# Supplementary material for: Prolonging somatic cell proliferation through constitutive hox gene expression in C. elegans
Source: Nat Commun. 2023 Oct 27;14:6850. doi: 10.1038/s41467-023-42644-1 (PMC10611754; doi:10.1038/s41467-023-42644-1)
Supplement: Supplementary file 4 — Supplementary Data 1 [file 41467_2023_42644_MOESM4_ESM.xlsx]

## Sheet: Sheet1
gene_id	transcript_id	gene_name	type	biotypes	description	gc	featWidth	GO BP	GO MF	GO CC	isPresent	log2 Ratio	pValue	fdr	seqnames	start	end	width	strand	GFP-positive Exp_1	GFP-positive Exp_2	GFP-positive Exp_3	GFP-negative Exp_1	GFP-negative Exp_2	GFP-negative Exp_3	F27mcm4_GFP_1 [FPKM]	F27mcm4_GFP_2 [FPKM]	F27mcm4_GFP_3 [FPKM]	F27mcm4_nonGFP_1 [FPKM]	F27mcm4_nonGFP_2 [FPKM]	F27mcm4_nonGFP_3 [FPKM]	Cluster
WBGene00001883	ZK131.3.1	his-9	protein_coding	protein_coding	WBGene00001883	0.5231	411		GO:0003677; GO:0046982	GO:0000786	FALSE	21.9199	2.03246e-08		II	13823648	13824058	411	+	0	0	242.003	0	0	0	0	0	34.9565	0	0	0
WBGene00001887	ZK131.7.1	his-13	protein_coding	protein_coding	WBGene00001887	0.5231	411		GO:0003677; GO:0046982	GO:0000786	FALSE	21.9199	2.03246e-08		II	13820210	13820620	411	+	0	0	242.003	0	0	0	0	0	34.9565	0	0	0
WBGene00021232	Y19D10B.3.1	irld-15	protein_coding	protein_coding	WBGene00021232	0.4041	1131				FALSE	20.3939	6.66666e-10		V	2301743	2303868	2126	-	0	80.7781	0	0	0	0	0	3.55832	0	0	0	0
WBGene00007490	C09G5.8a.1; C09G5.8b.1; C09G5.8c	mks-5	protein_coding	protein_coding	WBGene00007490	0.4198	2687	GO:0006935; GO:0022615; GO:0030030; GO:0060271; GO:0097500; GO:1904491; GO:1905515	GO:0003674	GO:0005929; GO:0035869; GO:0036064; GO:0042995	TRUE	10.5585	1.61538e-14	1.57421e-13	II	10720231	10729252	9022	+	154.722	192.825	600.124	0	0	0	3.14636	3.57528	13.2594	0	0	0	5
WBGene00018727	F53A9.4.1	jbts-14	protein_coding	protein_coding	WBGene00018727	0.3938	1267	GO:0030030; GO:0060271; GO:1905515		GO:0005929; GO:0016020; GO:0016021; GO:0035869; GO:0036064; GO:0042995	TRUE	9.85376	5.99619e-12	4.58623e-11	X	8704309	8707197	2889	+	72.13	128.333	381.582	0	0	0	3.11075	5.04632	17.8797	0	0	0	5
WBGene00013403	Y63D3A.2.1	fbxb-100	protein_coding	protein_coding	WBGene00013403	0.4581	967				TRUE	9.45078	5.11618e-13	4.32823e-12	I	14090738	14096346	5609	-	109.572	124.424	206.401	0	0	0	6.19151	6.41051	12.6717	0	0	0	5
WBGene00012503	Y26D4A.5a.1; Y26D4A.5b	Y26D4A.5	protein_coding	protein_coding	WBGene00012503	0.3366	451			GO:0016020; GO:0016021	TRUE	8.97389	8.1002e-11	5.46764e-10	I	13076270	13077020	751	+	62.2801	84.548	169.99	0	0	0	7.53733	9.32951	22.3519	0	0	0	5
WBGene00003024	C07H6.7.1; C07H6.7.2	lin-39	protein_coding	protein_coding	WBGene00003024	0.392	1298	GO:0006355; GO:0006357; GO:0009952; GO:0040026; GO:0042659; GO:0045893; GO:0048337; GO:0051302	GO:0000978; GO:0000981; GO:0000987; GO:0003677; GO:0003700; GO:0043565	GO:0005634	TRUE	8.62598	9.28721e-222	1.12589e-217	III	7528641	7536632	7992	-	422965	489327	319209	1102.19	853.987	1160.13	17805.5	18781.8	14599.9	26.5549	20.4692	30.9498	5
WBGene00001903	F35H10.11.1	his-29	protein_coding	protein_coding	WBGene00001903	0.5149	369		GO:0003677; GO:0046982	GO:0000786	TRUE	8.54853	8.97087e-10	5.39989e-09	IV	8331044	8331412	369	-	66.9587	118.209	49.4199	0	0	0	9.9153	15.9602	7.95106	0	0	0
WBGene00001908	F17E9.9.1	his-34	protein_coding	protein_coding	WBGene00001908	0.5149	369	GO:0045087	GO:0003677; GO:0046982	GO:0000786	TRUE	8.54853	8.97087e-10	5.39989e-09	IV	8335972	8336340	369	+	66.9587	118.209	49.4199	0	0	0	9.9153	15.9602	7.95106	0	0	0
WBGene00021041	W05G11.4.1	clp-10	protein_coding	protein_coding	WBGene00021041	0.4003	2101	GO:0006508	GO:0004198	GO:0005737	TRUE	8.51227	1.56465e-08	8.16893e-08	III	35454	39462	4009	-	38.5428	41.0405	150.898	0	0	0	1.0024	0.973195	4.26391	0	0	0
WBGene00011127	R07H5.7.1	fbxb-79	protein_coding	protein_coding	WBGene00011127	0.3416	723				TRUE	8.13908	3.46506e-07	1.53646e-06	IV	11188891	11189613	723	-	55.6117	106.184	13.8757	0	0	0	4.20294	7.31703	1.13937	0	0	0
WBGene00016072	C24H12.2.1	C24H12.2	protein_coding	protein_coding	WBGene00016072	0.4644	450				TRUE	8.01816	8.34456e-08	3.99531e-07	II	436867	438748	1882	+	28.6318	91.8525	41.6271	0	0	0	3.47665	10.1693	5.49178	0	0	0
WBGene00194670	K07E3.9.1	K07E3.9	protein_coding	protein_coding	WBGene00194670	0.3728	896				TRUE	7.9465	0.0420361	0.0689026	X	8108094	8109210	1117	+	20.9232	133.544	0	0	0	0	1.27599	7.4256	0	0	0	0
WBGene00045234	Y26D4A.17a.1; Y26D4A.17b	Y26D4A.17	protein_coding	protein_coding	WBGene00045234	0.35	447			GO:0016020; GO:0016021	TRUE	7.8465	1.74216e-07	8.00311e-07	I	13077073	13077941	869	+	28.02	35.9676	81.5071	0	0	0	3.4252	4.00882	10.8252	0	0	0
WBGene00021643	Y47G6A.17.1	ccep-290	protein_coding	protein_coding	WBGene00021643	0.4281	5260	GO:1904491; GO:1905515		GO:0035869; GO:1990805	TRUE	7.83355	5.4114e-12	4.15731e-11	I	3487812	3499706	11895	-	123.887	164.813	525.543	0	3.95364	0	1.28697	1.56106	5.93159	0	0.0233849	0	5
WBGene00010969	R01E6.5.1	R01E6.5	protein_coding	protein_coding	WBGene00010969	0.5052	869				TRUE	7.76469	9.40215e-22	1.51371e-20	X	13537051	13538042	992	+	1976.69	584.99	1233.2	3.09603	0	13.9904	124.292	33.5384	84.2489	0.111417	0	0.55749	5
WBGene00007641	C17E4.1a.1; C17E4.1b.1	C17E4.1	protein_coding	protein_coding	WBGene00007641	0.4034	1204				TRUE	7.70334	4.61288e-06	1.71335e-05	I	9408356	9410094	1739	-	14.3159	22.1488	95.3955	0	0	0	0.649706	0.916512	4.70382	0	0	0
WBGene00007448	C08F8.6.1	C08F8.6	protein_coding	protein_coding	WBGene00007448	0.429	1219	GO:0006468; GO:0007165; GO:0016310; GO:0018105	GO:0000166; GO:0004672; GO:0004674; GO:0005524; GO:0016301	GO:0005634; GO:0005737	TRUE	7.65404	6.85109e-09	3.74125e-08	IV	11162768	11164622	1855	-	100.762	71.658	72.8475	1.03201	0	0	4.51666	2.9287	3.54781	0.0264755	0	0
WBGene00010241	F58D2.2.1	F58D2.2	protein_coding	protein_coding	WBGene00010241	0.4432	2024			GO:0016020; GO:0016021	TRUE	7.64554	2.70886e-06	1.04651e-05	IV	13189717	13192349	2633	+	12.1134	39.7376	74.5819	0	0	0	0.327026	0.978149	2.18762	0	0	0
WBGene00003657	C08F8.8.1	nhr-67	protein_coding	protein_coding	WBGene00003657	0.382	1492	GO:0006355; GO:0006357; GO:0012501; GO:0016477; GO:0030154; GO:0030334; GO:0030522; GO:0035262; GO:0045944; GO:0048856; GO:2000134	GO:0000977; GO:0000978; GO:0003677; GO:0003700; GO:0004879; GO:0005515; GO:0008270; GO:0043565; GO:0046872	GO:0005634	TRUE	7.63643	2.42628e-116	9.80458e-113	IV	11169834	11174783	4950	+	37037.9	27941.4	29073.1	221.882	112.02	137.752	1356.45	933.025	1156.84	4.6507	2.33588	3.19709	5
WBGene00013613	Y102A5C.4.1	Y102A5C.4	protein_coding	protein_coding	WBGene00013613	0.4137	1593				TRUE	7.585	6.88041e-06	2.48543e-05	V	16922252	16924258	2007	+	15.4171	85.3382	19.0791	0	0	0	0.528826	2.66895	0.711036	0	0	0
WBGene00269431	T16A1.10.1	T16A1.10	protein_coding	protein_coding	WBGene00269431	0.3737	289				TRUE	7.54251	3.05145e-06	1.16981e-05	II	2091772	2092111	340	-	34.6885	13.6802	69.3786	0	0	0	6.55863	2.35834	14.252	0	0	0
WBGene00016220	C29F9.5.1	C29F9.5	protein_coding	protein_coding	WBGene00016220	0.5305	786	GO:0006355; GO:0016573; GO:0045944	GO:0003712; GO:0003713; GO:0004402; GO:0031490; GO:0046872	GO:0000123; GO:0005634; GO:0005667	TRUE	7.43048	7.42279e-08	3.57799e-07	III	117556	118767	1212	+	53.9599	105.533	50.2994	1.03201	0	0	3.75123	6.68926	3.79918	0.0410606	0	0
WBGene00009869	F49C5.7.1	F49C5.7	protein_coding	protein_coding	WBGene00009869	0.4658	672				TRUE	7.36227	0.000102114	0.000300981	II	12566165	12568297	2133	+	11.5628	5.86293	86.7232	0	0	0	0.9402	0.434669	7.66152	0	0	0
WBGene00010898	M28.7.1	nphp-1	protein_coding	protein_coding	WBGene00010898	0.4167	2076	GO:0007610; GO:0008104; GO:0008340; GO:0023041; GO:0030030; GO:0034606; GO:0034607; GO:0090251; GO:1905515	GO:0003674	GO:0005737; GO:0005929; GO:0035869; GO:0036064; GO:0097546; GO:0097730	TRUE	7.36118	1.99336e-16	2.26057e-15	II	10648938	10652256	3319	-	171.24	338.096	927.938	5.16004	0	3.22856	4.50716	8.11382	26.5363	0.0777304	0	0.0538527	5
WBGene00020758	T24C4.2.1	T24C4.2	protein_coding	protein_coding	WBGene00020758	0.4426	1351				TRUE	7.33354	4.09401e-07	1.80021e-06	III	867512	869987	2476	-	26.9799	67.098	104.068	1.03201	0	0	1.09122	2.47439	4.5731	0.0238887	0	0
WBGene00001207	R53.3a.1; R53.3b.1; R53.3c	egl-43	protein_coding	protein_coding	WBGene00001207	0.4648	1592	GO:0000122; GO:0006355; GO:0006357; GO:0007346; GO:0007399; GO:0030334; GO:0042659; GO:0045664; GO:0045944	GO:0000978; GO:0001228; GO:0003700; GO:0046872	GO:0005634	TRUE	7.25695	3.18006e-17	3.80196e-16	II	9955185	9962344	7160	+	1644.12	2220.09	1052.82	0	26.3576	6.45712	56.4308	69.477	39.2609	0	0.515093	0.14045	5
WBGene00008728	F13A7.13.1	sre-36	protein_coding	protein_coding	WBGene00008728	0.378	1053	GO:0007606		GO:0016020; GO:0016021	TRUE	7.22341	5.30932e-06	1.95163e-05	V	16399688	16401625	1938	+	27.5305	48.2063	17.3446	0	0	0	1.4286	2.28081	0.977881	0	0	0
WBGene00019072	F58H7.7.1	fbxc-8	protein_coding	protein_coding	WBGene00019072	0.3928	1413				TRUE	7.18176	3.05408e-06	1.16981e-05	IV	909415	911196	1782	+	37.119	118.341	21.2134	0.107292	0.0788369	0.715333	1.43542	4.17258	0.891285	0.00237459	0.00173584	0.0175304
WBGene00045299	C44C8.8.1	fbxc-11	protein_coding	protein_coding	WBGene00045299	0.3928	1413				TRUE	7.18176	3.05408e-06	1.16981e-05	IV	901110	902891	1782	+	37.119	118.341	21.2134	0.107292	0.0788369	0.715333	1.43542	4.17258	0.891285	0.00237459	0.00173584	0.0175304
WBGene00045300	C44C8.9.1	fbxc-10	protein_coding	protein_coding	WBGene00045300	0.3928	1413				TRUE	7.18176	3.05408e-06	1.16981e-05	IV	896958	898739	1782	+	37.119	118.341	21.2134	0.107292	0.0788369	0.715333	1.43542	4.17258	0.891285	0.00237459	0.00173584	0.0175304
WBGene00045301	C44C8.10.1	fbxc-9	protein_coding	protein_coding	WBGene00045301	0.3928	1413				TRUE	7.18176	3.05408e-06	1.16981e-05	IV	892806	894586	1781	+	37.119	118.341	21.2134	0.107292	0.0788369	0.715333	1.43542	4.17258	0.891285	0.00237459	0.00173584	0.0175304
WBGene00005029	AH6.7.1	sra-3	protein_coding	protein_coding	WBGene00005029	0.3346	1037	GO:0007186; GO:0007606; GO:0050907; GO:0050911	GO:0004930; GO:0004984	GO:0016020; GO:0016021	TRUE	7.13178	5.66354e-10	3.50481e-09	II	9539274	9540823	1550	-	191.613	643.619	90.1921	0	0	6.45712	10.0965	30.9217	5.16344	0	0	0.215618	5
WBGene00012240	W04A8.5.1	W04A8.5	protein_coding	protein_coding	WBGene00012240	0.3701	1070				TRUE	7.07607	0.000122069	0.000355049	I	13849599	13850893	1295	-	7.15794	63.1893	13.8757	0	0	0	0.365536	2.94221	0.769876	0	0	0
WBGene00011460	T05A10.3.1	ttr-14	protein_coding	protein_coding	WBGene00011460	0.3922	1415			GO:0005576; GO:0009986	FALSE	6.99105	0.000168061		X	10787503	10789700	2198	+	3.85428	267.74	8.67232	0	0	2.15237	0.148837	9.42694	0.363855	0	0	0.0526729
WBGene00009901	F49E12.8.1	F49E12.8	protein_coding	protein_coding	WBGene00009901	0.3971	894				TRUE	6.94445	4.1242e-06	1.54362e-05	II	8392571	8394202	1632	-	20.9232	89.2468	39.8927	1.03201	0	0	1.27884	4.97357	2.64914	0.0361003	0	0
WBGene00045190	R01H2.8.1	R01H2.8	protein_coding	protein_coding	WBGene00045190	0.3392	395			GO:0016020; GO:0016021	TRUE	6.89849	3.37309e-05	0.0001089	III	7069103	7069580	478	+	8.80977	30.6175	107.537	0	0	1.07619	1.21869	3.86177	16.1625	0	0	0.0943444
WBGene00005965	F41F3.6a.1; F41F3.6b	srx-74	protein_coding	protein_coding	WBGene00005965	0.3639	832				TRUE	6.88889	5.63393e-05	0.000174406	V	4658949	4662500	3552	-	8.80977	34.5261	31.2203	0	0	0	0.578585	2.06746	2.22773	0	0	0
WBGene00015375	C03B1.4.1	C03B1.4	protein_coding	protein_coding	WBGene00015375	0.4462	762				TRUE	6.77937	7.07955e-06	2.54977e-05	X	6364496	6365717	1222	+	22.0244	31.9204	81.5198	0	1.31788	0	1.57934	2.08702	6.35122	0	0.0538077	0
WBGene00016682	C45G9.11.1	C45G9.11	protein_coding	protein_coding	WBGene00016682	0.4169	1065				TRUE	6.77482	0.000702036	0.0017548	III	5063993	5068725	4733	-	44.0489	1.95431	22.548	0	0	0	2.26001	0.0914234	1.25692	0	0	0
WBGene00022733	ZK418.3.1	tmem-17	protein_coding	protein_coding	WBGene00022733	0.3402	438	GO:1905515		GO:0016020; GO:0016021; GO:0035869	TRUE	6.76841	7.80408e-05	0.000235053	III	7070281	7070885	605	+	11.5628	17.5888	39.8927	0	0	0	1.4425	2.00067	5.40715	0	0	0
WBGene00012176	W01C9.2.1	W01C9.2	protein_coding	protein_coding	WBGene00012176	0.3727	2015				TRUE	6.7313	3.1527e-05	0.00010244	II	8536133	8538603	2471	+	81.4904	9.77155	38.1582	0	0	1.07619	2.20982	0.241603	1.12425	0	0	0.0184943
WBGene00010647	K08C7.4.1	K08C7.4	protein_coding	protein_coding	WBGene00010647	0.4466	936				TRUE	6.70074	2.54899e-44	1.66137e-42	IV	10679383	10680475	1093	-	699.276	544.601	737.147	9.28808	3.95364	5.38094	40.8224	28.9878	46.7549	0.310324	0.131415	0.199071	5
WBGene00016935	C54G7.4.1	ifta-1	protein_coding	protein_coding	WBGene00016935	0.4101	3804	GO:0006935; GO:0035721; GO:0042073; GO:0060271; GO:1905515		GO:0005930; GO:0030991; GO:0036064	TRUE	6.69772	0.00184981	0.00422004	X	5545684	5552756	7073	-	168.487	324.415	1300.85	0	0	17.219	2.4202	4.24888	20.3018	0	0	0.156745
WBGene00021479	Y39H10A.2a.1; Y39H10A.2b.1; Y39H10A.2c.1	oac-55	protein_coding	protein_coding	WBGene00021479	0.4468	1902		GO:0016747	GO:0016020; GO:0016021	TRUE	6.6847	3.7282e-05	0.000119411	V	3761139	3766306	5168	+	19.822	22.1488	22.548	0	0	0	0.569459	0.580168	0.703796	0	0	0
WBGene00023451	K08E3.10.1	mlc-7	protein_coding	protein_coding	WBGene00023451	0.4363	706		GO:0005509	GO:0016460	TRUE	6.5609	1.54156e-49	1.53183e-47	III	13752406	13755861	3456	+	2656.7	3297.57	2062.28	12.3841	34.2649	38.7427	205.619	232.704	173.417	0.548561	1.50997	1.90025	5
WBGene00021641	Y47G6A.15.1	Y47G6A.15	protein_coding	protein_coding	WBGene00021641	0.4209	967				TRUE	6.54883	2.4236e-16	2.7306e-15	I	3472965	3476311	3347	-	998.808	6851.81	707.661	20.6402	40.8543	30.1332	56.4392	353.014	43.4458	0.667501	1.31442	1.07906	5
WBGene00010642	K07G5.3.1	mks-6	protein_coding	protein_coding	WBGene00010642	0.3663	3672	GO:1904491; GO:1905515	GO:0003674	GO:0035869; GO:0044292	TRUE	6.42643	1.10369e-07	5.22453e-07	I	7161016	7166518	5503	+	57.8141	133.544	452.695	7.22406	0	0	0.860314	1.81191	7.31901	0.0615239	0	0
WBGene00001904	F35H10.1.1	his-30	protein_coding	protein_coding	WBGene00001904	0.4974	384		GO:0003677; GO:0046982	GO:0000786	TRUE	6.41511	1.95653e-05	6.59287e-05	IV	8331666	8332049	384	+	28.6419	54.0544	20.2712	0.561826	0	0	4.07565	7.01316	3.13399	0.0457546	0	0
WBGene00001907	F17E9.13.1	his-33	protein_coding	protein_coding	WBGene00001907	0.4974	384		GO:0003677; GO:0046982	GO:0000786	TRUE	6.41511	1.95653e-05	6.59287e-05	IV	8335335	8335718	384	-	28.6419	54.0544	20.2712	0.561826	0	0	4.07565	7.01316	3.13399	0.0457546	0	0
WBGene00019482	K07C11.10.1	K07C11.10	protein_coding	protein_coding	WBGene00019482	0.4466	468	GO:0060271; GO:0097500		GO:0034464	TRUE	6.3962	3.51262e-05	0.000113013	V	8226061	8226852	792	-	22.0244	19.5431	62.4407	0	0	1.07619	2.57149	2.08047	7.92084	0	0	0.0796283
WBGene00045456	C10A4.9a.1; C10A4.9b.1	C10A4.9	protein_coding	protein_coding	WBGene00045456	0.3828	632			GO:0016020; GO:0016021	TRUE	6.38903	3.44162e-18	4.40114e-17	X	7420871	7422628	1758	+	930.53	3642.83	487.384	28.8963	11.8609	19.3714	80.4524	287.168	45.7829	1.42985	0.583882	1.06137	5
WBGene00021368	Y37E11AR.1.1	best-20	protein_coding	protein_coding	WBGene00021368	0.4514	1553	GO:0006811; GO:0006821	GO:0005254	GO:0005886; GO:0016020; GO:0016021; GO:0034707	TRUE	6.37605	1.32399e-05	4.58593e-05	IV	3756242	3759910	3669	+	25.3281	29.9661	46.8305	1.03201	0	0	0.891162	0.961329	1.79022	0.0207815	0	0
WBGene00235308	C37C3.17.1	C37C3.17	protein_coding	protein_coding	WBGene00235308	0.4356	489				TRUE	6.28754	4.44365e-23	7.98079e-22	V	7860786	7861688	903	-	2467.84	1103.53	1793.44	38.1843	3.95364	25.8285	275.761	112.432	217.734	2.44197	0.251543	1.82901	5
WBGene00019430	K06A5.2.1	K06A5.2	protein_coding	protein_coding	WBGene00019430	0.4357	1104			GO:0016020; GO:0016021	TRUE	6.23347	0.0186487	0.033508	I	6468113	6469392	1280	+	7.15794	39.7376	0	0	0	0	0.354278	1.79327	0	0	0	0
WBGene00013042	Y49E10.23a.1; Y49E10.23a.2; Y49E10.23b.1; Y49E10.23b.2	cccp-1	protein_coding	protein_coding	WBGene00013042	0.394	2402	GO:0090325; GO:0099518; GO:1990502	GO:0031267	GO:0005802; GO:0030424; GO:0043025; GO:0048471	TRUE	6.22029	5.22337e-15	5.25501e-14	III	12472868	12484651	11784	+	1613.29	2982.28	1056.29	30.9602	1.31788	43.0474	36.6999	61.857	26.1071	0.403084	0.0170697	0.620583	5
WBGene00005887	C03A7.3.1	srw-140	protein_coding	protein_coding	WBGene00005887	0.35	1140	GO:0007186	GO:0008528	GO:0005886; GO:0016020; GO:0016021	FALSE	6.14966	0.00685981		V	5165726	5167241	1516	+	1.10122	5.86293	38.1582	0	0	0	0.0527832	0.256226	1.98716	0	0	0
WBGene00017949	F31D5.6.1	F31D5.6	protein_coding	protein_coding	WBGene00017949	0.4132	242				TRUE	6.14681	3.93854e-06	1.47837e-05	II	4209738	4210066	329	+	49.0044	178.494	29.4859	0	3.95364	0	11.0648	36.7469	7.23349	0	0.508283	0
WBGene00016486	C36C9.3.1	fbxa-170	protein_coding	protein_coding	WBGene00016486	0.3938	1539				TRUE	6.14557	0.000592465	0.0015067	X	1676205	1678121	1917	-	15.4171	11.7259	17.3446	0	0	0	0.547381	0.379594	0.669077	0	0	0
WBGene00012492	Y20C6A.2.1	fbxb-7	protein_coding	protein_coding	WBGene00012492	0.3938	1064				TRUE	6.13823	0.00195405	0.00442619	V	17377406	17379226	1821	+	7.70855	5.86293	31.2203	0	0	0	0.395874	0.274528	1.74199	0	0	0
WBGene00044770	C53C11.5.1	C53C11.5	protein_coding	protein_coding	WBGene00044770	0.4103	680			GO:0016020; GO:0016021	TRUE	6.13159	4.65618e-11	3.22738e-10	X	17334052	17336169	2118	+	328.164	907.451	215.074	0	15.8146	5.38094	26.3698	66.4856	18.777	0	0.723556	0.274015	5
WBGene00045298	C44C8.7.1	fbxc-12	protein_coding	protein_coding	WBGene00045298	0.3928	1413				TRUE	6.11246	3.4682e-16	3.84675e-15	IV	905263	907044	1782	+	137.291	370.249	185.723	2.66686	1.00253	5.74816	5.30915	13.0547	7.8032	0.0590231	0.0220739	0.140868	5
WBGene00007328	C05C10.1.1	pho-10	protein_coding	protein_coding	WBGene00007328	0.4102	1236	GO:0016311	GO:0003993; GO:0016787; GO:0016791		TRUE	6.10357	0.000670778	0.00168745	II	9918125	9920568	2444	-	13.2147	14.3316	15.6102	0	0	0	0.584202	0.577683	0.749788	0	0	0
WBGene00016165	C27F2.1.1	wdr-60	protein_coding	protein_coding	WBGene00016165	0.3736	2136	GO:0007018; GO:0042073	GO:0045503; GO:0045504	GO:0005868; GO:0097014	TRUE	6.09796	6.10606e-09	3.35262e-08	III	4987209	4991450	4242	+	56.7129	128.984	386.785	2.06402	6.58941	0	1.4508	3.0085	10.7502	0.0302188	0.0959772	0
WBGene00001931	F54E12.5a.1; F54E12.5b.1; F54E12.5c.1	his-57	protein_coding	protein_coding	WBGene00001931	0.5125	482		GO:0003677; GO:0046982	GO:0000786; GO:0005634; GO:0005694	TRUE	6.03747	4.86467e-08	2.40026e-07	IV	11340412	11341703	1292	+	58.2101	72.9503	101.865	0	3.64251	0	6.59487	7.5357	12.5389	0	0.234967	0
WBGene00044387	C27A2.8.1	C27A2.8	protein_coding	protein_coding	WBGene00044387	0.3967	547	GO:0030431; GO:0032222; GO:1903818			TRUE	6.02981	3.49368e-15	3.54723e-14	II	5067088	5067980	893	-	212.536	234.517	1129.14	7.22406	10.5431	6.45712	21.231	21.36	122.549	0.413009	0.599656	0.408768	5
WBGene00017014	D1009.5.1	dylt-2	protein_coding	protein_coding	WBGene00017014	0.4194	372	GO:0007018	GO:0045505	GO:0005737; GO:0005868; GO:0005930	TRUE	6.01271	3.57056e-05	0.000114725	X	8939389	8940143	755	-	18.7208	32.5718	91.9266	2.06402	0	0	2.74983	4.36227	14.6706	0.173514	0	0
WBGene00021390	Y38A10A.4.1	fbxa-214	protein_coding	protein_coding	WBGene00021390	0.3758	1232				TRUE	6.00439	0.00112009	0.00268305	V	6067811	6070068	2258	-	12.664	10.423	17.3446	0	0	0	0.561678	0.421497	0.835803	0	0	0
WBGene00012345	W08E3.4.1	W08E3.4	protein_coding	protein_coding	WBGene00012345	0.4217	837	GO:0061817; GO:0090158	GO:0033149	GO:0005789; GO:0005886	TRUE	5.99874	0.00159237	0.00368474	I	13337460	13338921	1462	-	16.5183	16.2859	6.93786	0	0	0	1.07837	0.969394	0.492095	0	0	0
WBGene00019136	F59H6.5.1	F59H6.5	protein_coding	protein_coding	WBGene00019136	0.4548	4461				FALSE	5.99325	0.00239589		II	2003377	2008250	4874	+	4.72752	23.1055	11.825	0	0	0	0.0579064	0.258046	0.157368	0	0	0
WBGene00021028	W04C9.6.1	W04C9.6	protein_coding	protein_coding	WBGene00021028	0.4174	1380	GO:0055085	GO:0022857	GO:0016020; GO:0016021	TRUE	5.98661	0.00291421	0.00636947	I	484126	487990	3865	-	8.80977	25.406	5.20339	0	0	0	0.348828	0.917215	0.22385	0	0	0
WBGene00018460	F45D11.15.1	F45D11.15	protein_coding	protein_coding	WBGene00018460	0.4203	1506				FALSE	5.98387	0.117748		II	1010444	1012282	1839	-	2.85911e-07	0.00435562	39.8613	0.00261057	0.0363103	8.13297e-05	1.03737e-08	0.000144092	1.57136	5.42095e-05	0.000750115	1.87004e-06
WBGene00018461	F45D11.16.1	F45D11.16	protein_coding	protein_coding	WBGene00018461	0.4203	1506				FALSE	5.98387	0.117748		II	1016262	1018100	1839	-	2.85911e-07	0.00435562	39.8613	0.00261057	0.0363103	8.13297e-05	1.03737e-08	0.000144092	1.57136	5.42095e-05	0.000750115	1.87004e-06
WBGene00019705	M01D1.10.1	fbxb-45	protein_coding	protein_coding	WBGene00019705	0.376	1008				TRUE	5.97698	0.00395536	0.00837422	II	1042969	1044025	1057	-	6.05672	4.56006	29.4859	0	0	0	0.328324	0.225384	1.73661	0	0	0
WBGene00003889	B0212.5.1	osm-9	protein_coding	protein_coding	WBGene00003889	0.4769	2875	GO:0006811; GO:0006972; GO:0007608; GO:0008355; GO:0009612; GO:0010286; GO:0022401; GO:0042048; GO:0055085; GO:0098703	GO:0005216; GO:0005261; GO:0005262; GO:0097604	GO:0005887; GO:0016020; GO:0016021; GO:0043025; GO:0048471; GO:0097730	FALSE	5.96026	0.0505138		IV	3551090	3557431	6342	-	0	37.1319	1.73446	0	0	0	0	0.643462	0.035816	0	0	0
WBGene00020231	T05A8.5.1	T05A8.5	protein_coding	protein_coding	WBGene00020231	0.5432	1145				FALSE	5.95936	0.00426675		II	2731319	2735250	3932	-	5.50611	28.0118	5.20339	0	0	0	0.262763	1.21885	0.269793	0	0	0
WBGene00012621	Y38H6C.8.1	Y38H6C.8	protein_coding	protein_coding	WBGene00012621	0.4346	665	GO:0044419	GO:0005515; GO:0030246	GO:0009897	TRUE	5.89706	6.28761e-26	1.32565e-24	V	20514637	20515706	1070	+	510.416	936.766	367.706	6.19205	9.22517	15.0666	41.94	70.1815	32.8268	0.291191	0.431595	0.784548	5
WBGene00019604	K09H11.7.1	pgph-1	protein_coding	protein_coding	WBGene00019604	0.386	969	GO:0016311	GO:0016787; GO:0016791	GO:0005737	TRUE	5.8957	0.0102938	0.0197174	V	5752463	5753532	1070	-	0	22.5419	51.1479	0	0	0.932996	0	1.15899	3.13367	0	0	0.0333412
WBGene00006655	F10B5.4.1	tub-1	protein_coding	protein_coding	WBGene00006655	0.3655	1956	GO:0006629; GO:0006935; GO:0050896; GO:0061512; GO:0097500	GO:0003674	GO:0005575; GO:0005737; GO:0005929; GO:0030424; GO:0030425; GO:0042995	FALSE	5.8578	0.0117094		II	8154096	8156937	2842	-	4.40489	1.30287	31.2203	0	0	0	0.123053	0.0331854	0.947585	0	0	0
WBGene00000295	W01C8.6a.1; W01C8.6b.1	cat-1	protein_coding	protein_coding	WBGene00000295	0.4312	1800	GO:0006837; GO:0007631; GO:0015842; GO:0015872; GO:0042417; GO:0051610; GO:0055085; GO:0090494	GO:0005330; GO:0005335; GO:0022857	GO:0008021; GO:0016020; GO:0016021; GO:0030672; GO:0043195	TRUE	5.85657	0.00213149	0.0047923	X	5705719	5710625	4907	-	13.7653	13.6801	8.67232	0	0	0	0.417867	0.378645	0.28603	0	0	0
WBGene00021150	Y1B5A.1.1	Y1B5A.1	protein_coding	protein_coding	WBGene00021150	0.4542	273				TRUE	5.83439	0.00013428	0.000387314	X	7085367	7085639	273	+	24.1886	26.3199	18.7711	0.00309608	1.93321	0	4.84142	4.80324	4.08202	0.000354662	0.220313	0
WBGene00019812	R01H2.4a.1; R01H2.4b.1	R01H2.4	protein_coding	protein_coding	WBGene00019812	0.3924	1362				TRUE	5.81748	4.37252e-08	2.17782e-07	III	7061111	7064275	3165	-	49.555	65.7951	194.26	4.12804	0	1.07619	1.98809	2.40674	8.4675	0.0947832	0	0.0273613
WBGene00009908	F49H6.5a.1; F49H6.5b.1	F49H6.5	protein_coding	protein_coding	WBGene00009908	0.403	1070	GO:0006777	GO:0000166; GO:0003824; GO:0005525; GO:0016829; GO:0046872; GO:0051536; GO:0051539; GO:0061798; GO:0061799	GO:0019008	TRUE	5.77746	0.00292644	0.00639441	V	17023473	17025347	1875	+	15.2948	8.66899	10.6227	0	0	0	0.781063	0.403644	0.589385	0	0	0
WBGene00017110	E03H12.3.1	clec-176	protein_coding	protein_coding	WBGene00017110	0.3522	1008			GO:0016020; GO:0016021	FALSE	5.76078	0.136329		IV	4984046	4985375	1330	+	0	33.8747	0	0	0	0	0	1.67428	0	0	0	0
WBGene00017713	F22E5.20.1	F22E5.20	protein_coding	protein_coding	WBGene00017713	0.426	723				TRUE	5.72412	0.00930896	0.0180391	II	2672632	2673634	1003	-	2.16784	7.1658	24.9171	0	0	0	0.163838	0.493787	2.04602	0	0	0
WBGene00014914	Y52B11A.11.1	Y52B11A.11	protein_coding	protein_coding	WBGene00014914	0.4932	1026				FALSE	5.71441	0.00736582		I	11067699	11069996	2298	-	18.3741	2.28194	11.9203	0	0	0	0.978553	0.110808	0.689743	0	0	0
WBGene00013389	Y62H9A.1.1	Y62H9A.1	protein_coding	protein_coding	WBGene00013389	0.3579	1101			GO:0016020; GO:0016021	TRUE	5.71286	0.00426186	0.00896056	X	11875654	11877242	1589	+	7.15794	16.9373	8.67232	0	0	0	0.355244	0.766428	0.467624	0	0	0
WBGene00013712	Y106G6G.3.1	dlc-6	protein_coding	protein_coding	WBGene00013712	0.3918	513	GO:0007017		GO:0030286; GO:0110165	TRUE	5.69758	2.04295e-05	6.86248e-05	I	10323511	10324145	635	+	51.7574	32.5718	31.2203	0	0	2.15237	5.51291	3.16328	3.61301	0	0	0.145287
WBGene00016761	C49A9.7.1	tkr-2	protein_coding	protein_coding	WBGene00016761	0.4022	1176	GO:0007165; GO:0007186; GO:0007218	GO:0004930; GO:0008188	GO:0005887; GO:0016020; GO:0016021	TRUE	5.64591	4.65684e-17	5.50242e-16	IV	6202080	6205703	3624	+	376.067	343.307	206.401	8.25607	0	9.68568	17.4736	14.5442	10.4197	0.219549	0	0.285199	5
WBGene00000561	C34E10.7.1	cnd-1	protein_coding	protein_coding	WBGene00000561	0.3682	785	GO:0006357; GO:0007399; GO:0007413; GO:0014014; GO:0030154; GO:0030182	GO:0000978; GO:0000981; GO:0003677; GO:0003700; GO:0046983	GO:0005634	TRUE	5.64072	0.000614322	0.00155673	III	5240593	5242108	1516	-	9.91099	12.3773	251.497	0	0	5.38094	0.689879	0.785542	19.0201	0	0	0.237363
WBGene00018020	F33H12.6.1	F33H12.6	protein_coding	protein_coding	WBGene00018020	0.4544	4379				TRUE	5.61852	0.0452894	0.0736674	II	2594052	2598903	4852	-	10.8387	19.4129	0.0320326	0	0	0	0.135247	0.220866	0.000434277	0	0	0
WBGene00017097	E02C12.12.1; E02C12.12.2	E02C12.12	protein_coding	protein_coding	WBGene00017097	0.3686	714				FALSE	5.59121	0.00621251		V	9380068	9382336	2269	-	5.50611	14.3316	10.4068	0	0	0	0.421378	1.00002	0.865302	0	0	0
WBGene00009044	F22B5.6.1	F22B5.6	protein_coding	protein_coding	WBGene00009044	0.3411	689			GO:0016020; GO:0016021	FALSE	5.58972	0.011728		II	8454612	8456194	1583	-	3.30366	21.4974	5.20339	0	0	0	0.262001	1.55446	0.448349	0	0	0
WBGene00005297	F26F12.6a.1; F26F12.6b.1	srh-76	protein_coding	protein_coding	WBGene00005297	0.333	1008			GO:0016020; GO:0016021	TRUE	5.57999	0.0498285	0.0798824	V	5833831	5835183	1353	+	8.25916	21.4974	0	0	0	0	0.447714	1.06252	0	0	0	0
WBGene00020875	T28A11.13.1	T28A11.13	protein_coding	protein_coding	WBGene00020875	0.4444	369				TRUE	5.57296	0.00882382	0.0171864	V	3249743	3250205	463	-	14.3159	11.7259	3.46893	0	0	0	2.11991	1.58319	0.558108	0	0	0
WBGene00011124	R07H5.4.1	sdz-27	protein_coding	protein_coding	WBGene00011124	0.3523	721	GO:0007369		GO:0016020; GO:0016021	TRUE	5.56267	4.25005e-27	9.66666e-26	IV	11187012	11188264	1253	+	2272.92	1135.45	2454.27	23.7362	28.9934	71.0284	172.256	78.4599	202.086	1.02953	1.25109	3.41132	5
WBGene00016520	C39B5.2a.1; C39B5.2b.1	C39B5.2	protein_coding	protein_coding	WBGene00016520	0.384	1258				TRUE	5.54456	1.68242e-15	1.74773e-14	III	2233888	2236987	3100	+	695.972	514.635	397.193	1.03201	13.1788	20.4476	30.2299	20.3813	18.7443	0.0256547	0.325926	0.562842	5
WBGene00020220	T05A7.2.1	clec-140	protein_coding	protein_coding	WBGene00020220	0.4146	779		GO:0030246		TRUE	5.52165	2.49908e-07	1.1271e-06	II	4674420	4675729	1310	+	34.6885	57.9778	64.1752	1.03201	1.31788	1.07619	2.43317	3.70799	4.89079	0.0414296	0.0526335	0.0478383
WBGene00003395	F38E1.7.1; F38E1.7.2	mom-2	protein_coding	protein_coding	WBGene00003395	0.4258	1554	GO:0000132; GO:0001714; GO:0001764; GO:0007275; GO:0016055; GO:0030010; GO:0030182; GO:0045165; GO:0045167; GO:0048557; GO:0048598; GO:0060070; GO:0070986; GO:0097402; GO:0097475; GO:1904936; GO:1905485	GO:0005102; GO:0005109; GO:0005125; GO:0030971	GO:0005576; GO:0005615	TRUE	5.51154	5.7802e-19	7.70037e-18	V	8355953	8358185	2233	+	4627.33	3475.41	2854.93	83.5927	17.1325	138.828	162.707	111.421	109.067	1.68222	0.342998	3.09351	5
WBGene00011220	R10E11.9.1	R10E11.9	protein_coding	protein_coding	WBGene00011220	0.3436	614			GO:0016020; GO:0016021	TRUE	5.49535	1.69898e-24	3.26415e-23	III	9792548	9793642	1095	-	1148.57	1830.54	731.944	26.8322	11.8609	43.0475	102.215	148.533	70.7715	1.36664	0.600999	2.42776	5
WBGene00009248	F29C12.6.1	F29C12.6	protein_coding	protein_coding	WBGene00009248	0.4479	288				TRUE	5.48117	0.0111652	0.0211891	II	13129902	13130189	288	+	9.91099	14.3316	3.46893	0	0	0	1.8804	2.47922	0.715076	0	0	0
WBGene00013187	Y54E2A.1.1	npr-34	protein_coding	protein_coding	WBGene00013187	0.4743	1948	GO:0007165; GO:0007186; GO:0007218	GO:0004930; GO:0004983	GO:0005886; GO:0016020; GO:0016021	TRUE	5.47064	0.000134387	0.000387531	II	14734410	14739243	4834	-	40.7452	41.6919	15.6102	0	0	2.15237	1.14291	1.06629	0.475738	0	0	0.0382608
WBGene00016931	C54G6.2a.1; C54G6.2b.1; C54G6.2c.1	C54G6.2	protein_coding	protein_coding	WBGene00016931	0.4392	722	GO:0000902; GO:0051661; GO:0051684		GO:0000922; GO:0005737; GO:0005815; GO:0005856; GO:0031616	FALSE	5.46215	0.0160067		I	1006177	1010765	4589	+	2.75305	4.56006	20.8136	0	0	0	0.208355	0.314664	1.71143	0	0	0
WBGene00019699	M01D1.2a.1; M01D1.2b.1	math-34	protein_coding	protein_coding	WBGene00019699	0.4136	1669				FALSE	5.45717	0.163472		II	1028987	1033664	4678	+	0	0	27.7514	0	0	0	0	0	0.987139	0	0	0
WBGene00001890	ZK131.10.1	his-16	protein_coding	protein_coding	WBGene00001890	0.5273	385	GO:0045087; GO:0050829	GO:0003677; GO:0046982	GO:0000786	TRUE	5.45618	2.56321e-06	9.93407e-06	II	13817759	13818143	385	-	62.7625	164.195	55.482	6.23975	0	0	8.90768	21.2478	8.55541	0.506841	0	0
WBGene00001687	F59D12.4.1	gpn-1	protein_coding	protein_coding	WBGene00001687	0.3989	1835	GO:0001764; GO:0002119; GO:0009792; GO:0009966; GO:0016477; GO:0048730; GO:1905475		GO:0009986; GO:0016020; GO:0045202; GO:0046658; GO:0062023	TRUE	5.4486	8.61341e-50	8.7017e-48	X	15681693	15687477	5785	+	2244.29	3384.21	2553.13	51.6004	44.808	90.3997	66.8295	91.883	82.6012	0.879391	0.7597	1.70591	5
WBGene00022406	Y97E10B.4.1	srsx-7	protein_coding	protein_coding	WBGene00022406	0.3486	918	GO:0007186	GO:0004930	GO:0016020; GO:0016021	FALSE	5.44334	0.019694		V	7925783	7926920	1138	+	2.75305	20.846	3.46893	0	0	0	0.163869	1.13134	0.224337	0	0	0
WBGene00000257	F23B12.8a.1; F23B12.8a.2; F23B12.8b.1; F23B12.8b.2	bmk-1	protein_coding	protein_coding	WBGene00000257	0.439	3015	GO:0007018; GO:0090307; GO:1902845	GO:0000166; GO:0003774; GO:0005515; GO:0005524; GO:0008017; GO:0008574	GO:0000922; GO:0005634; GO:0005819; GO:0005874; GO:0005876; GO:0051233	TRUE	5.44102	1.40601e-22	2.4385e-21	V	14453305	14456998	3694	-	3019.55	5750.88	3840.1	103.201	30.3113	156.047	54.7243	95.0299	75.6145	1.07044	0.312781	1.79223	5
WBGene00007309	C04G2.10a.1; C04G2.10b.1; C04G2.10c.1	C04G2.10	protein_coding	protein_coding	WBGene00007309	0.4518	1030	GO:0000278; GO:0016310; GO:0035556; GO:0072355	GO:0016301; GO:0072354	GO:0005634; GO:0005737	FALSE	5.43623	0.0747289		IV	10115389	10118084	2696	+	2.20244	24.7546	0	0	0	0	0.11684	1.19738	0	0	0	0
WBGene00017586	F19B10.4.1	F19B10.4	protein_coding	protein_coding	WBGene00017586	0.4402	1011				TRUE	5.42698	8.99535e-14	8.23645e-13	II	3660084	3661809	1726	+	123.887	171.328	130.085	6.19205	0	3.22856	6.69579	8.44287	7.63879	0.191535	0	0.110582	5
WBGene00011910	T22B3.2a.1; T22B3.2b.1	alg-3	protein_coding	protein_coding	WBGene00011910	0.4489	3234	GO:0007283; GO:0035194	GO:0003676; GO:0003723; GO:0003727; GO:0035198	GO:0005737; GO:0043186	FALSE	5.42394	0.0118051		IV	11704246	11708264	4019	+	7.70855	3.90862	15.6102	0	0	0	0.130244	0.0602139	0.286561	0	0	0
WBGene00007191	B0491.4a.1; B0491.4b.1	lgc-20	protein_coding	protein_coding	WBGene00007191	0.4214	1524	GO:0006811; GO:0007165; GO:0007268; GO:0034220; GO:0042391; GO:0050877; GO:1902476	GO:0004888; GO:0005216; GO:0005230; GO:0005254; GO:0030594	GO:0005887; GO:0016020; GO:0016021; GO:0043005; GO:0045202	TRUE	5.41637	4.54849e-07	1.98708e-06	II	11340092	11343530	3439	-	69.9276	76.2181	324.345	0	9.22517	2.15238	2.5072	2.49165	12.6349	0	0.188327	0.0489056
WBGene00016189	C28G1.4.1	C28G1.4	protein_coding	protein_coding	WBGene00016189	0.4054	3340	GO:0006357	GO:0000977; GO:0000981	GO:0005634	FALSE	5.39907	0.074257		X	8849137	8853621	4485	-	12.664	0	13.8757	0	0	0	0.207182	0	0.246637	0	0	0
WBGene00008613	F09C3.5.1	fbxb-69	protein_coding	protein_coding	WBGene00008613	0.3713	1002				FALSE	5.38731	0.0286554		I	14283464	14285319	1856	-	0.550611	13.6802	12.1412	0	0	0	0.0300263	0.680201	0.719358	0	0	0
WBGene00008066	C43D7.2.1	fbxb-65	protein_coding	protein_coding	WBGene00008066	0.3806	1093				TRUE	5.36146	0.00268537	0.00591258	V	19329563	19330747	1185	+	4.40489	16.9373	29.4859	1.03201	0	0	0.220212	0.772038	1.60156	0.0295276	0	0
WBGene00269373	M01D1.12.1	M01D1.12	protein_coding	protein_coding	WBGene00269373	0.4382	1093				TRUE	5.3519	3.24494e-07	1.44255e-06	II	1026028	1027725	1698	+	208.131	180.448	931.407	6.19205	0	25.8285	10.405	8.22518	50.5905	0.177166	0	0.818285
WBGene00008529	F02E9.3.1	F02E9.3	protein_coding	protein_coding	WBGene00008529	0.3948	960				TRUE	5.34354	0.0123578	0.0232269	I	8404547	8405955	1409	-	6.05672	12.3773	6.93786	0	0	0	0.34474	0.642344	0.429045	0	0	0
WBGene00022654	ZK105.3.1	ZK105.3	protein_coding	protein_coding	WBGene00022654	0.3744	2409				FALSE	5.3353	0.103456		V	7697142	7700760	3619	+	0	23.4517	1.73446	0	0	0	0	0.485011	0.0427442	0	0	0
WBGene00001906	F17E9.10.1	his-32	protein_coding	protein_coding	WBGene00001906	0.5044	565		GO:0003677; GO:0046982	GO:0000786	TRUE	5.32941	4.76678e-28	1.14205e-26	IV	8334298	8334862	565	+	3827.65	7580.44	3100.22	149.06	61.9404	149.507	370.177	668.435	325.756	8.25046	3.41074	9.16303	5
WBGene00018456	F45D11.10a.1; F45D11.10b.1	fbxc-39	protein_coding	protein_coding	WBGene00018456	0.4065	1037				TRUE	5.31759	5.57286e-09	3.0821e-08	II	988737	991074	2338	+	123.337	165.465	192.525	1.03201	0	10.7619	6.49889	7.94951	11.022	0.0311221	0	0.359364
WBGene00018771	F53G12.3.1	duox-2	protein_coding	protein_coding	WBGene00018771	0.4138	4512	GO:0006952; GO:0006979; GO:0040032; GO:0042338; GO:0042554; GO:0050665; GO:0098869	GO:0004601; GO:0016174; GO:0016175; GO:0016491; GO:0020037; GO:0106293; GO:0106294	GO:0005886; GO:0016020; GO:0016021; GO:0043020	FALSE	5.31506	0.0241603		I	137845	144565	6721	+	17.4085	2.02336	5.62839	0	0	0	0.210823	0.0223417	0.0740567	0	0	0
WBGene00018042	F35D2.4.1	mks-3	protein_coding	protein_coding	WBGene00018042	0.3641	2694	GO:0060271; GO:1905515		GO:0016020; GO:0016021; GO:0035869; GO:0036038	TRUE	5.30132	5.73692e-07	2.46452e-06	II	7580270	7583557	3288	-	47.9031	87.2925	248.028	0	7.90729	2.15237	0.97161	1.61433	5.46579	0	0.0913173	0.027666
WBGene00008259	C52E4.7.1	C52E4.7	protein_coding	protein_coding	WBGene00008259	0.3734	1007				FALSE	5.29724	0.0250506		V	11994295	11995858	1564	+	2.75305	18.2402	3.46893	0	0	0	0.149386	0.902431	0.20451	0	0	0
WBGene00009280	F31B9.3.1	F31B9.3	protein_coding	protein_coding	WBGene00009280	0.4039	864				TRUE	5.27619	2.90351e-06	1.11673e-05	X	15923738	15925169	1432	+	29.733	47.5549	52.0339	2.06402	0	1.07619	1.8804	2.74217	3.57538	0.0747076	0	0.043132
WBGene00009695	F44F1.3.1	clp-8	protein_coding	protein_coding	WBGene00009695	0.3804	2003	GO:0006508	GO:0004198; GO:0008233; GO:0008234; GO:0016787	GO:0005737	FALSE	5.26873	0.0318936		I	13254141	13257729	3589	+	3.30366	18.8917	1.73446	0	0	0	0.090124	0.469897	0.0514083	0	0	0
WBGene00011414	T04A8.13.1	T04A8.13	protein_coding	protein_coding	WBGene00011414	0.3933	872				TRUE	5.26751	0.015329	0.0281374	III	4706978	4708382	1405	+	7.70855	11.0744	5.20339	0	0	0	0.483039	0.632729	0.354258	0	0	0
WBGene00019320	K02E10.6.1	K02E10.6	protein_coding	protein_coding	WBGene00019320	0.4309	803				TRUE	5.26185	2.48978e-14	2.37292e-13	X	2480755	2482911	2157	-	1009.27	3731.43	1019.86	15.4801	67.212	67.7998	68.6779	231.512	75.4009	0.60287	2.60408	2.92374	5
WBGene00019140	F59H6.10.1	bath-3	protein_coding	protein_coding	WBGene00019140	0.4008	1018				FALSE	5.26138	0.0181541		II	2029232	2030467	1236	-	3.30366	7.1658	13.8757	0	0	0	0.177327	0.350696	0.809202	0	0	0
WBGene00013154	Y53F4B.7.1	Y53F4B.7	protein_coding	protein_coding	WBGene00013154	0.4009	459				FALSE	5.24628	0.0159833		II	14992898	14993403	506	+	4.67861	9.13874	9.65364	0.00184803	0.0304889	0.00254546	0.556967	0.991944	1.24861	0.00012591	0.00206658	0.000192035
WBGene00016527	C39B5.9.1	fbxa-47	protein_coding	protein_coding	WBGene00016527	0.3634	930				FALSE	5.24451	0.0174114		III	2229992	2232460	2469	-	4.40489	12.3773	6.93786	0	0	0	0.258808	0.663065	0.442886	0	0	0
WBGene00016025	C23H5.3.1	xbx-4	protein_coding	protein_coding	WBGene00016025	0.4178	383				TRUE	5.23069	0.00149242	0.00347534	IV	2114626	2115625	1000	+	12.664	17.5888	15.6102	0	1.31788	0	1.80676	2.28797	2.41968	0	0.107053	0
WBGene00007286	C04A11.2.1	C04A11.2	protein_coding	protein_coding	WBGene00007286	0.4347	1608				TRUE	5.22842	1.52491e-15	1.58682e-14	X	13665958	13668830	2873	-	172.892	313.992	745.819	13.4161	11.8609	7.53331	5.87508	9.72852	27.5357	0.260919	0.229486	0.162228	5
WBGene00010047	F54D1.6.1; F54D1.6.2	F54D1.6	protein_coding	protein_coding	WBGene00010047	0.3994	4764	GO:0007160; GO:0051013	GO:0008568	GO:0016020; GO:0016021	TRUE	5.22784	1.05662e-39	5.2071e-38	IV	11287811	11294913	7103	+	11746.2	11573.4	9725.15	159.961	280.709	441.237	134.725	121.033	121.192	1.05005	1.83319	3.2072	5
WBGene00019174	H09G03.1.1	H09G03.1	protein_coding	protein_coding	WBGene00019174	0.3882	912				TRUE	5.21748	3.64832e-50	3.8797e-48	III	3226352	3230652	4301	+	1391.94	1324.37	2254.8	45.4084	38.2186	49.5046	83.3974	72.3483	146.779	1.55706	1.30378	1.87965	5
WBGene00005743	T13A10.12.1	srv-32	protein_coding	protein_coding	WBGene00005743	0.3673	1029			GO:0016020; GO:0016021	FALSE	5.20602	0.0274004		IV	6280147	6282243	2097	-	2.20244	15.6345	5.20339	0	0	0	0.116954	0.756975	0.300207	0	0	0
WBGene00018338	F42A9.9.1	F42A9.9	protein_coding	protein_coding	WBGene00018338	0.3948	1264			GO:0016020; GO:0016021	TRUE	5.19657	0.018254	0.0328914	IV	8637387	8638861	1475	-	10.5679	7.43172	4.76684	0	0	0	0.456842	0.292924	0.223889	0	0	0
WBGene00006140	T26H2.6a.1; T26H2.6b	str-81	protein_coding	protein_coding	WBGene00006140	0.3643	1206	GO:0007186; GO:0042048; GO:0050911	GO:0038022	GO:0005887; GO:0016020; GO:0016021	FALSE	5.19038	0.024236		V	19225543	19251083	25541	-	4.40489	3.25718	15.6102	0	0	0	0.199578	0.134558	0.76844	0	0	0
WBGene00018438	F45C12.7.1	btb-6	protein_coding	protein_coding	WBGene00018438	0.4156	1191				FALSE	5.17933	0.10101		II	1715162	1716497	1336	+	0	12.3773	10.4068	0	0	0	0	0.517759	0.518745	0	0	0
WBGene00001127	C02H7.1.1	dyf-11	protein_coding	protein_coding	WBGene00001127	0.4105	1671	GO:0006935; GO:0006972; GO:0008306; GO:0042073; GO:0043053; GO:0045184; GO:0048609; GO:0055088; GO:0060271; GO:0065003; GO:0070507; GO:1905515		GO:0005813; GO:0005930; GO:0030992; GO:0036064	FALSE	5.17167	0.100884		X	763769	766713	2945	+	7.15794	0	15.6102	0	0	0	0.234065	0	0.554601	0	0	0
WBGene00021416	Y38F2AL.2.1	mksr-2	protein_coding	protein_coding	WBGene00021416	0.4678	528	GO:0008104; GO:0008340; GO:0030030; GO:0035177; GO:0060271; GO:1904491; GO:1905515	GO:0005515	GO:0005737; GO:0005929; GO:0030425; GO:0035869; GO:0036038; GO:0036064; GO:0044292	TRUE	5.16379	2.18663e-05	7.32077e-05	IV	2304446	2306540	2095	-	24.2269	28.0118	105.802	3.09603	0	1.07619	2.5072	2.64314	11.8963	0.183373	0	0.0705796
WBGene00009743	F45H11.1a.1; F45H11.1b.1	sptf-1	protein_coding	protein_coding	WBGene00009743	0.418	1097	GO:0006357; GO:0010628; GO:0030182	GO:0000978; GO:0000981; GO:0046872		TRUE	5.15876	2.60138e-39	1.25145e-37	I	10366621	10371699	5079	+	1912.82	2401.19	2286.02	34.0563	59.3047	91.4759	95.2782	109.052	123.715	0.970858	1.68192	2.88752	5
WBGene00014154	ZK930.4.1	ZK930.4	protein_coding	protein_coding	WBGene00014154	0.4389	736				FALSE	5.15479	0.107695		II	11906517	11908601	2085	+	0	5.21149	17.3446	0	0	0	0	0.352775	1.39906	0	0	0
WBGene00018772	F53G12.4.1	F53G12.4	protein_coding	protein_coding	WBGene00018772	0.4729	1070		GO:0005515		TRUE	5.14416	0.000683222	0.00171414	I	134337	137282	2946	+	10.4616	22.8003	84.9887	0	0	3.22856	0.534244	1.06162	4.71549	0	0	0.104484
WBGene00012017	T25C8.1.1	T25C8.1	protein_coding	protein_coding	WBGene00012017	0.4381	1308	GO:0005975; GO:0016310	GO:0016773; GO:0050277	GO:0005829	TRUE	5.1398	0.0251071	0.0435752	III	13608072	13614704	6633	+	6.05672	12.3773	3.46893	0	0	0	0.25302	0.471445	0.157448	0	0	0
WBGene00021734	Y50C1A.2.1	Y50C1A.2	protein_coding	protein_coding	WBGene00021734	0.43	1221				FALSE	5.13242	0.0207862		I	412911	418660	5750	-	8.80977	4.56006	8.67232	0	0	0	0.394253	0.186066	0.421666	0	0	0
WBGene00219300	W10G6.6.1	W10G6.6	protein_coding	protein_coding	WBGene00219300	0.3896	249			GO:0016020; GO:0016021	TRUE	5.12923	0.000128199	0.000371188	X	16247920	16250554	2635	-	32.486	26.0575	20.8136	1.03201	1.31788	0	7.12891	5.2137	4.96245	0.129613	0.164665	0
WBGene00000405	T05G5.3.1; T05G5.3.2	cdk-1	protein_coding	protein_coding	WBGene00000405	0.4332	1205	GO:0000086; GO:0000278; GO:0001556; GO:0006468; GO:0007049; GO:0007095; GO:0008595; GO:0016310; GO:0018105; GO:0018107; GO:0032436; GO:0045836; GO:0051301; GO:0051321; GO:0051446; GO:0071902	GO:0000166; GO:0004672; GO:0004674; GO:0004693; GO:0004712; GO:0005524; GO:0008353; GO:0016301; GO:0016740; GO:0019901; GO:0106310	GO:0005634; GO:0005737; GO:0005815; GO:0005856	TRUE	5.10971	7.57586e-21	1.13106e-19	III	9747432	9748852	1421	+	4630.08	6763.89	4282.39	214.657	44.808	193.714	209.956	279.655	210.983	5.57088	1.15689	5.56671	5
WBGene00009130	F25H5.8.1	F25H5.8	protein_coding	protein_coding	WBGene00009130	0.3633	278			GO:0016020; GO:0016021	TRUE	5.10777	0.00462048	0.00962606	I	9177664	9178703	1040	-	32.486	39.7376	1.73446	2.06402	0	0	6.38524	7.12149	0.370399	0.232185	0	0
WBGene00010869	M05B5.1.1	M05B5.1	protein_coding	protein_coding	WBGene00010869	0.4492	1338	GO:0006470; GO:0035335	GO:0004725	GO:0016020; GO:0016021	TRUE	5.10243	5.49003e-15	5.50958e-14	I	7177953	7179430	1478	-	530.789	409.102	284.452	4.12804	6.58941	24.7523	21.6766	15.2331	12.6212	0.0964833	0.153219	0.640597	5
WBGene00021194	Y16E11A.2.1	Y16E11A.2	protein_coding	protein_coding	WBGene00021194	0.4551	4401				FALSE	5.08963	0.0249502		II	1979245	1984118	4874	-	10.7037	4.15182	6.58931	0	0	0	0.132894	0.0470003	0.088887	0	0	0
WBGene00022692	ZK250.9.1	ZK250.9	protein_coding	protein_coding	WBGene00022692	0.4551	4401				FALSE	5.08963	0.0249502		II	1963063	1967936	4874	-	10.7037	4.15182	6.58931	0	0	0	0.132894	0.0470003	0.088887	0	0	0
WBGene00001544	C17F4.6a.1; C17F4.6b.1; C17F4.6c.1	gcy-19	protein_coding	protein_coding	WBGene00001544	0.4591	3699	GO:0006182; GO:0006468; GO:0007165; GO:0007168; GO:0009190; GO:0035556	GO:0001653; GO:0004383; GO:0004672; GO:0005524; GO:0016829	GO:0005886; GO:0016020; GO:0016021	TRUE	5.08366	0.000517809	0.0013342	II	3250985	3259354	8370	-	19.822	18.2402	38.1582	0	0	2.15238	0.292812	0.245674	0.612424	0	0	0.0201493
WBGene00011903	T21E8.5.1	T21E8.5	protein_coding	protein_coding	WBGene00011903	0.4074	297				FALSE	5.0751	0.0285453		X	10886278	10887052	775	+	9.91099	2.60575	8.67232	0	0	0	1.82342	0.437108	1.73352	0	0	0
WBGene00005750	ZK105.2.1	srw-3	protein_coding	protein_coding	WBGene00005750	0.384	1047	GO:0007186	GO:0008528	GO:0005886; GO:0016020; GO:0016021	FALSE	5.07507	0.124545		V	7705616	7706955	1340	+	0	17.5888	3.46893	0	0	0	0	0.836956	0.196697	0	0	0
WBGene00016397	C34D4.1.1	maph-9	protein_coding	protein_coding	WBGene00016397	0.396	1543	GO:0000281; GO:0051225; GO:0090307; GO:1902412	GO:0008017	GO:0000235; GO:0005737; GO:0005856; GO:0005929; GO:0005930; GO:0042995; GO:0097546	TRUE	5.06437	0.00205345	0.00462456	IV	7156900	7160109	3210	+	12.1134	9.77155	52.0339	2.06402	0	0	0.42897	0.315508	2.00203	0.0418324	0	0
WBGene00012372	W09H1.1a.1; W09H1.1b.1	W09H1.1	protein_coding	protein_coding	WBGene00012372	0.4532	1382	GO:0006470; GO:0043409	GO:0004721; GO:0008330; GO:0017017	GO:0005737	TRUE	5.0511	0.00386209	0.00820398	II	13175857	13181561	5705	-	14.8665	18.2402	6.93785	1.03201	0	0	0.587796	0.65756	0.298034	0.0233529	0	0
WBGene00219302	Y43F8B.28.1	Y43F8B.28	protein_coding	protein_coding	WBGene00219302	0.5712	555				TRUE	5.04594	0.0118433	0.0223414	V	19485319	19485873	555	+	8.80977	29.3146	1.73446	0	0	1.07619	0.867356	2.63151	0.185533	0	0	0.067146
WBGene00008550	F07B10.4a.1; F07B10.4b.1	F07B10.4	protein_coding	protein_coding	WBGene00008550	0.3368	1029			GO:0016020; GO:0016021	FALSE	5.03823	0.198626		V	11261264	11263116	1853	-	0	0	20.8136	0	0	0	0	0	1.20083	0	0	0
WBGene00001345	F29G9.4a.1; F29G9.4b.1	fos-1	protein_coding	protein_coding	WBGene00001345	0.4276	1888	GO:0000122; GO:0001708; GO:0006355; GO:0006357; GO:0008340; GO:0009653; GO:0010628; GO:0034769; GO:0040025; GO:0042594; GO:0045087; GO:0045893; GO:0045944; GO:0060142; GO:1903854	GO:0000977; GO:0000978; GO:0000981; GO:0003677; GO:0003682; GO:0003700; GO:0005515; GO:0042802; GO:0042826; GO:0043565; GO:0051019; GO:0061629	GO:0005634; GO:0090575	TRUE	5.02056	4.34709e-100	1.05399e-96	V	6003601	6016087	12487	+	38476.1	37258.3	29373.2	1173.39	908.02	1155.82	1113.56	983.182	923.63	19.436	14.9629	21.199	5
WBGene00016467	C36B7.4.1	C36B7.4	protein_coding	protein_coding	WBGene00016467	0.4258	660			GO:0016020; GO:0016021	TRUE	5.01273	2.20945e-23	4.04411e-22	X	7083417	7086008	2592	-	2496.51	1449.19	2144.11	84.6216	21.7887	80.714	206.688	109.394	192.864	4.00961	1.02709	4.23478	5
WBGene00022405	Y97E10B.3.1	srsx-6	protein_coding	protein_coding	WBGene00022405	0.3529	921	GO:0007186	GO:0004930	GO:0016020; GO:0016021	FALSE	4.99852	0.0446066		V	7927084	7928451	1368	+	4.40489	13.6802	1.73446	0	0	0	0.261337	0.740023	0.111803	0	0	0
WBGene00005108	F07C4.5.1	srd-30	protein_coding	protein_coding	WBGene00005108	0.4503	975			GO:0016020; GO:0016021	TRUE	4.9832	0.0325205	0.0548936	V	7629804	7631298	1495	+	7.70855	8.46867	3.46893	0	0	0	0.43201	0.432737	0.211222	0	0	0
WBGene00019081	F59A3.8.1	F59A3.8	protein_coding	protein_coding	WBGene00019081	0.4391	1840	GO:0006468; GO:0007169; GO:0016310; GO:0018108; GO:0030154; GO:0045087	GO:0000166; GO:0004672; GO:0004712; GO:0004713; GO:0004715; GO:0005102; GO:0005524; GO:0016301; GO:0016740	GO:0031234	FALSE	4.9785	0.0540099		I	5522396	5525340	2945	-	2.20244	15.6345	1.73446	0	0	0	0.0654052	0.42333	0.0559624	0	0	0
WBGene00021791	Y51H7C.13.1	Y51H7C.13	protein_coding	protein_coding	WBGene00021791	0.4955	1114				FALSE	4.97006	0.204839		II	1463268	1466546	3279	-	0	19.5431	0	0	0	0	0	0.874021	0	0	0	0
WBGene00018659	F52C6.2.1	F52C6.2	protein_coding	protein_coding	WBGene00018659	0.4436	780				FALSE	4.9677	0.0562996		II	1926462	1927347	886	+	0.550611	7.1658	12.1412	0	0	0	0.0385723	0.457703	0.924098	0	0	0
WBGene00019087	F59A6.5.1	F59A6.5	protein_coding	protein_coding	WBGene00019087	0.4251	4030	GO:0018107; GO:0031032; GO:0035556	GO:0004674	GO:0005737; GO:0005856	TRUE	4.96077	2.67313e-53	3.56113e-51	II	4999520	5003806	4287	+	1095.72	1717.84	1214.12	43.3444	39.5364	46.276	14.8566	21.2369	17.8858	0.336351	0.305222	0.397628	5
WBGene00009599	F40G12.4.1	F40G12.4	protein_coding	protein_coding	WBGene00009599	0.3761	795				FALSE	4.9426	0.0458462		V	14267761	14268639	879	-	1.65183	12.3773	5.20339	0	0	0	0.113534	0.775661	0.388569	0	0	0
WBGene00005686	F36G9.6.1	sru-23	protein_coding	protein_coding	WBGene00005686	0.3807	972			GO:0016020; GO:0016021	FALSE	4.92138	0.209361		V	15970433	15972579	2147	-	0	18.8917	0	0	0	0	0	0.968316	0	0	0	0
WBGene00015722	C13A2.5.1	C13A2.5	protein_coding	protein_coding	WBGene00015722	0.3676	1700		GO:0016740; GO:0016757	GO:0016020; GO:0016021	FALSE	4.92138	0.209361		V	7275791	7278472	2682	+	0	18.8917	0	0	0	0	0	0.553649	0	0	0	0
WBGene00020053	R13A5.11a.1; R13A5.11b.1	R13A5.11	protein_coding	protein_coding	WBGene00020053	0.4128	1434	GO:0006470	GO:0004722; GO:0016787		FALSE	4.91837	0.03691		III	7591570	7593337	1768	-	5.50611	3.25718	10.4068	0	0	0	0.209808	0.113164	0.430841	0	0	0
WBGene00013955	ZK265.1a.1; ZK265.1b.1	kri-1	protein_coding	protein_coding	WBGene00013955	0.3704	2296	GO:0016525; GO:0045454; GO:2000114		GO:0005634; GO:0005886; GO:0016324; GO:0016327	TRUE	4.91444	0.00632963	0.0127677	I	8226509	8240637	14129	-	9.36038	20.1945	6.93786	0	0	1.07619	0.222765	0.438203	0.179392	0	0	0.0162309
WBGene00007269	C03C10.2.1	C03C10.2	protein_coding	protein_coding	WBGene00007269	0.3936	1057	GO:0006468; GO:0006897; GO:0007165; GO:0016310; GO:0018105	GO:0000166; GO:0004672; GO:0004674; GO:0004712; GO:0005524; GO:0016301; GO:0016740; GO:0106310	GO:0005634; GO:0005737	FALSE	4.91269	0.0607565		III	4091126	4093311	2186	+	0.550611	9.77155	8.67232	0	0	0	0.028464	0.460577	0.48709	0	0	0
WBGene00013659	Y105C5B.20.1	Y105C5B.20	protein_coding	protein_coding	WBGene00013659	0.4028	1060				FALSE	4.90606	0.0391553		IV	15993454	15994605	1152	-	2.75305	5.86293	10.4068	0	0	0	0.141917	0.275564	0.582854	0	0	0
WBGene00013100	Y51H4A.4a.1; Y51H4A.4b	zip-7	protein_coding	protein_coding	WBGene00013100	0.4637	510	GO:0006355; GO:0006357	GO:0000978; GO:0000981; GO:0003677; GO:0003700; GO:0005515; GO:0042802	GO:0005634	TRUE	4.90504	0.00343739	0.0073794	IV	16503249	16505682	2434	-	36.3403	29.9661	1.73446	1.03201	1.31788	0	3.88972	2.92447	0.201706	0.0632197	0.0803163	0
WBGene00000395	ZK112.7.1	cdh-3	protein_coding	protein_coding	WBGene00000395	0.3801	10160	GO:0007155; GO:0007156; GO:0016331; GO:0034769; GO:0045138	GO:0005198; GO:0005509; GO:0046872	GO:0005604; GO:0005737; GO:0005886; GO:0005887; GO:0016020; GO:0016021; GO:0016323; GO:0030054	TRUE	4.89263	1.10788e-36	4.67972e-35	III	7741326	7754448	13123	-	1194.27	2173.19	1600.91	39.2163	52.7153	75.3331	6.42297	10.6566	9.35454	0.120709	0.161423	0.256754	5
WBGene00001876	T10C6.13.1	his-2	protein_coding	protein_coding	WBGene00001876	0.5373	456		GO:0003677; GO:0046982	GO:0000786; GO:0005634; GO:0005694	TRUE	4.87893	2.04632e-16	2.31847e-15	V	16041828	16042283	456	-	275.54	304.851	119.86	6.43623	9.65323	8.3983	33.0176	33.3071	15.6049	0.441399	0.658614	0.637752	5
WBGene00009979	F53F1.1.1	cutl-1	protein_coding	protein_coding	WBGene00009979	0.38	1200			GO:0016020; GO:0016021	FALSE	4.86184	0.00864554		V	13404031	13406014	1984	-	3.85428	16.2859	15.6102	1.03201	0	0	0.175504	0.676152	0.772282	0.0268947	0	0
WBGene00003252	F01F1.13a.1; F01F1.13b.1	mig-21	protein_coding	protein_coding	WBGene00003252	0.4043	931	GO:0001764; GO:0007399; GO:0030334; GO:0035545; GO:0060828; GO:0097402	GO:0038023	GO:0005886; GO:0016020; GO:0016021	TRUE	4.83942	7.32087e-11	4.96648e-10	III	5877020	5878419	1400	-	219.143	154.39	485.65	5.16004	21.0861	4.30475	12.8549	8.25754	30.9521	0.173235	0.704266	0.160026	5
WBGene00017589	F19B10.10.1; F19B10.10.2	F19B10.10	protein_coding	protein_coding	WBGene00017589	0.4418	2072	GO:0045087			TRUE	4.83535	8.78207e-22	1.41576e-20	II	3677535	3681415	3881	-	962.469	1400.59	1007.72	39.2163	64.5762	15.0666	25.3818	33.6771	28.8736	0.591892	0.96963	0.251798	5
WBGene00007271	C03C10.5.1	C03C10.5	protein_coding	protein_coding	WBGene00007271	0.4048	415				TRUE	4.83219	0.000604501	0.00153377	III	4089766	4092120	2355	-	22.0244	19.5431	84.9887	0	0	4.30475	2.89989	2.34617	12.158	0	0	0.359191
WBGene00184956	F49C5.12.1	F49C5.12	protein_coding	protein_coding	WBGene00184956	0.3898	626				TRUE	4.79783	0.00142077	0.00332702	II	12557808	12560264	2457	-	8.25916	30.6175	52.0339	3.09603	0	0	0.72092	2.43674	4.93471	0.154666	0	0
WBGene00007244	C01G12.3.1; C01G12.3.2	C01G12.3	protein_coding	protein_coding	WBGene00007244	0.4262	744				FALSE	4.79315	0.0581489		II	14581377	14582361	985	-	1.65183	3.90862	12.1412	0	0	0	0.121235	0.26156	0.968162	0	0	0
WBGene00016309	C32B5.16.1	sdz-4	protein_coding	protein_coding	WBGene00016309	0.3555	1159				FALSE	4.78428	0.174324		II	958918	960179	1262	+	15.4171	0	1.73446	0	0	0	0.72685	0	0.0888446	0	0	0
WBGene00017611	F19G12.3.1	F19G12.3	protein_coding	protein_coding	WBGene00017611	0.5345	348				TRUE	4.77895	0.00890156	0.0173244	X	1425727	1426164	438	+	39.0934	26.0575	1.73446	0	2.63576	0	6.13832	3.73049	0.295893	0	0.235641	0
WBGene00206378	C14E2.11.1	C14E2.11	protein_coding	protein_coding	WBGene00206378	0.3431	1122	GO:0009790			FALSE	4.77695	0.159707		X	1801456	1805087	3632	+	0	5.21149	12.1412	0	0	0	0	0.23141	0.642421	0	0	0
WBGene00019452	K06H6.4.1	K06H6.4	protein_coding	protein_coding	WBGene00019452	0.3877	1509		GO:0016740; GO:0016757	GO:0016020; GO:0016021	FALSE	4.77208	0.223687		V	579277	581372	2096	+	0	0	17.3446	0	0	0	0	0	0.682378	0	0	0
WBGene00000906	F23B2.4.1	daf-10	protein_coding	protein_coding	WBGene00000906	0.3577	3643	GO:0006935; GO:0035721; GO:0046626; GO:0060271; GO:0061065; GO:0061066; GO:0061512; GO:0097500; GO:1905515		GO:0005929; GO:0030991; GO:0036064; GO:0042995; GO:0097730	TRUE	4.77034	2.72779e-09	1.55986e-08	IV	9136933	9146210	9278	-	185.005	205.202	782.243	3.09603	18.4503	21.5237	2.77492	2.80632	12.7477	0.0265773	0.157568	0.20459
WBGene00011447	T04F8.9.1	T04F8.9	protein_coding	protein_coding	WBGene00011447	0.4233	978			GO:0016020; GO:0016021	TRUE	4.76024	6.12311e-05	0.000188259	X	11674416	11677090	2675	+	33.5873	22.1488	34.6893	1.03201	0	2.15237	1.87655	1.1283	2.10574	0.0329997	0	0.0762087
WBGene00022076	Y69A2AR.5.1	daao-1	protein_coding	protein_coding	WBGene00022076	0.424	1073	GO:0019478; GO:0046416	GO:0003884; GO:0016491; GO:0071949	GO:0005737; GO:0005777	FALSE	4.74005	0.0652553		IV	2614200	2617135	2936	+	4.40489	10.423	1.73446	0	0	0	0.224316	0.483956	0.0959654	0	0	0
WBGene00005660	T05B11.2.1	srr-9	protein_coding	protein_coding	WBGene00005660	0.359	1167			GO:0016020; GO:0016021	FALSE	4.72191	0.175499		V	7738010	7739596	1587	+	0	13.0287	3.46893	0	0	0	0	0.556218	0.176471	0	0	0
WBGene00010461	K01D12.1.1	K01D12.1	protein_coding	protein_coding	WBGene00010461	0.3557	998			GO:0016020; GO:0016021	FALSE	4.7156	0.185556		V	12377556	12378832	1277	+	1.10122	0	15.6102	0	0	0	0.0602934	0	0.928595	0	0	0
WBGene00009061	F22G12.1.1	pals-14	protein_coding	protein_coding	WBGene00009061	0.4054	1068				FALSE	4.70838	0.23001		I	13139132	13141789	2658	+	0	16.2859	0	0	0	0	0	0.759721	0	0	0	0
WBGene00015610	C08F1.6.1	C08F1.6	protein_coding	protein_coding	WBGene00015610	0.4066	905			GO:0016020; GO:0016021	FALSE	4.70755	0.169628		II	1787222	1788187	966	-	4.40489	0	12.1412	0	0	0	0.265957	0	0.79646	0	0	0
WBGene00001631	H38K22.5a.1; H38K22.5a.2; H38K22.5b.1; H38K22.5b.2; H38K22.5c.1; H38K22.5c.2; H38K22.5d.1	gly-6	protein_coding	protein_coding	WBGene00001631	0.4108	2374	GO:0006486	GO:0016740; GO:0016757; GO:0030246; GO:0046872	GO:0000139; GO:0005794; GO:0016020; GO:0016021	TRUE	4.70709	1.76421e-75	1.06938e-72	III	4324280	4331227	6948	-	10378.5	7763.16	10502.2	301.346	401.954	393.885	238.879	162.919	262.632	3.96963	5.26768	5.74532	5
WBGene00011261	R13H4.1.1	nphp-4	protein_coding	protein_coding	WBGene00011261	0.3724	3993	GO:0008104; GO:0008340; GO:0016358; GO:0023041; GO:0034606; GO:0034607; GO:0035177; GO:0090090; GO:1904491; GO:1905515		GO:0005856; GO:0035869; GO:0036064; GO:0097546; GO:0097730	TRUE	4.70488	2.58007e-46	2.08521e-44	V	11831203	11843625	12423	-	1875.93	1379.74	2207.97	63.9846	56.6689	88.2473	25.671	17.2152	32.8279	0.501119	0.441539	0.765293	5
WBGene00016005	C18H9.8a.1; C18H9.8b.1	ift-74	protein_coding	protein_coding	WBGene00016005	0.3813	1834	GO:0006935; GO:0035264; GO:0035735; GO:0042073; GO:0050906; GO:0060271	GO:0005515; GO:0048487	GO:0005813; GO:0005929; GO:0030992; GO:0031514; GO:0097730	TRUE	4.70152	9.22889e-05	0.000274422	II	6680130	6682971	2842	+	26.9799	31.9204	251.497	4.12804	0	7.53331	0.803835	0.867126	8.1411	0.0703897	0	0.142237
WBGene00017416	F13B6.1.1; F13B6.1.2	F13B6.1	protein_coding	protein_coding	WBGene00017416	0.3857	1248				TRUE	4.68766	6.70031e-22	1.09324e-20	IV	7456525	7458214	1690	+	4671.93	3661.07	3540.05	62.9525	144.967	252.904	204.554	146.153	168.401	1.57748	3.61391	7.01725	5
WBGene00008070	C43D7.8.1	C43D7.8	protein_coding	protein_coding	WBGene00008070	0.3886	386				FALSE	4.68667	0.0621468		V	19310583	19311058	476	-	2.75305	3.25718	10.4068	0	0	0	0.38972	0.420405	1.60058	0	0	0
WBGene00008071	C43D7.9.1	fbxb-64	protein_coding	protein_coding	WBGene00008071	0.4089	834				FALSE	4.67782	0.0636007		V	19313275	19316512	3238	+	3.30366	2.60575	10.4068	0	0	0	0.216449	0.155661	0.740798	0	0	0
WBGene00000484	F38G1.1.1; F38G1.1.2	che-2	protein_coding	protein_coding	WBGene00000484	0.4096	2391	GO:0006935; GO:0030512; GO:0040014; GO:0040018; GO:0040024; GO:0060271; GO:0090325; GO:0090326	GO:0003674	GO:0005813; GO:0005929; GO:0030992; GO:0036064; GO:0097730	TRUE	4.63678	0.00129602	0.00305971	X	481378	486504	5127	+	28.6318	41.0405	185.588	0	10.5431	0	0.654326	0.855158	4.60807	0	0.137186	0
WBGene00235351	C32B5.18.1	C32B5.18	protein_coding	protein_coding	WBGene00235351	0.3607	280				FALSE	4.62171	0.168792		II	960533	960857	325	+	5.50611	9.77155	0	0	0	0	1.07451	1.73868	0	0	0	0
WBGene00013437	Y66D12A.11.1	Y66D12A.11	protein_coding	protein_coding	WBGene00013437	0.496	1119			GO:0016020; GO:0016021	FALSE	4.618	0.239201		III	11563467	11565536	2070	+	0	0	15.6102	0	0	0	0	0	0.828184	0	0	0
WBGene00013233	Y56A3A.14.1	sdz-33	protein_coding	protein_coding	WBGene00013233	0.3675	955				TRUE	4.60944	0.000151576	0.000432877	III	11907477	11908474	998	+	31.9152	49.7585	51.0258	5.16004	0	0	1.82608	2.59584	3.17202	0.168972	0	0
WBGene00022111	Y71F9AL.6.1	Y71F9AL.6	protein_coding	protein_coding	WBGene00022111	0.3934	816			GO:0016020; GO:0016021	TRUE	4.60741	9.03195e-06	3.19785e-05	I	2890446	2891261	816	+	28.0811	30.6175	52.0339	2.06402	1.31788	1.07619	1.8804	1.86936	3.78569	0.0791021	0.0502469	0.0456692
WBGene00018053	F35F10.2.1	srbc-3	protein_coding	protein_coding	WBGene00018053	0.3776	903			GO:0016020; GO:0016021	FALSE	4.60581	0.110616		V	3308469	3309689	1221	+	1.10122	0.651436	13.8757	0	0	0	0.0666365	0.0359416	0.912256	0	0	0
WBGene00018455	F45D11.9.1	fbxc-42	protein_coding	protein_coding	WBGene00018455	0.402	1535				FALSE	4.59308	0.189687		II	991600	993638	2039	+	9.91099	0	5.20339	0	0	0	0.352805	0	0.201246	0	0	0
WBGene00011267	R17.1.1	fbxb-85	protein_coding	protein_coding	WBGene00011267	0.3293	990				TRUE	4.58317	3.32795e-06	1.26751e-05	III	10847619	10848670	1052	-	62.7696	187.614	52.0339	6.19205	6.58941	0	3.46449	9.44154	3.12033	0.195598	0.207078	0
WBGene00000241	Y105E8A.5.1	bbs-1	protein_coding	protein_coding	WBGene00000241	0.4523	1919	GO:0015031; GO:0030030; GO:0035721; GO:0061512; GO:1905515	GO:0003674; GO:0005113; GO:0005119	GO:0005737; GO:0005813; GO:0005856; GO:0005929; GO:0005930; GO:0034464; GO:0036064; GO:0042995; GO:0043005	TRUE	4.57242	1.70501e-06	6.806e-06	I	14371142	14376025	4884	-	94.705	161.556	471.774	6.19205	23.7219	1.07619	2.69664	4.19433	14.5951	0.100908	0.384589	0.0194195
WBGene00018766	F53G2.1.1	F53G2.1	protein_coding	protein_coding	WBGene00018766	0.352	2145			GO:0031462	TRUE	4.56287	4.35698e-16	4.80179e-15	II	2488754	2496641	7888	+	211.435	429.297	645.221	16.5121	26.3576	11.8381	5.3861	9.97111	17.8579	0.240736	0.382298	0.191108	5
WBGene00009756	F46B3.1.1	F46B3.1	protein_coding	protein_coding	WBGene00009756	0.4425	617				FALSE	4.56283	0.196329		V	20596210	20597244	1035	-	0	4.56006	10.4068	0	0	0	0	0.368212	1.00134	0	0	0
WBGene00007372	C06B8.7.1	C06B8.7	protein_coding	protein_coding	WBGene00007372	0.4525	9546	GO:0006897	GO:0005044	GO:0016020; GO:0016021	TRUE	4.55771	9.40075e-26	1.96492e-24	V	15498743	15511421	12679	+	2038.36	2237.68	1411.85	47.4724	65.8941	128.066	11.6677	11.6786	8.78046	0.155519	0.214757	0.464557	5
WBGene00001905	F17E9.12.1	his-31	protein_coding	protein_coding	WBGene00001905	0.4495	465		GO:0003677; GO:0046982		TRUE	4.54246	3.00831e-20	4.3468e-19	IV	8333557	8334021	465	-	907.83	1921.59	610.351	39.536	52.9997	56.2792	106.679	205.883	77.9248	2.65891	3.54604	4.19103	5
WBGene00018761	F53E10.5.1	F53E10.5	protein_coding	protein_coding	WBGene00018761	0.397	1383				TRUE	4.54076	2.36388e-09	1.35946e-08	V	2596020	2598930	2911	-	116.179	80.7781	107.537	7.22406	0	5.38094	4.59019	2.90995	4.61619	0.163352	0	0.134729
WBGene00003099	F17E9.11.1	lys-10	protein_coding	protein_coding	WBGene00003099	0.361	734	GO:0007165			FALSE	4.53913	0.206244		IV	8332826	8333559	734	+	0	11.0744	3.46893	0	0	0	0	0.751689	0.280575	0	0	0
WBGene00077495	Y20C6A.4.1	Y20C6A.4	protein_coding	protein_coding	WBGene00077495	0.4007	846				FALSE	4.53913	0.206244		V	17380232	17381119	888	+	0	11.0744	3.46893	0	0	0	0	0.652175	0.24343	0	0	0
WBGene00019561	K09C6.7a.1; K09C6.7b.1	K09C6.7	protein_coding	protein_coding	WBGene00019561	0.4696	1825	GO:0000727; GO:0007165; GO:0018105	GO:0004674	GO:0005634; GO:0005737	TRUE	4.53053	0.00146006	0.00341046	V	835773	839099	3327	-	41.4018	15.3789	26.9484	0	3.95364	0	1.2396	0.419834	0.876636	0	0.0673997	0
WBGene00000099	B0207.4.1	air-2	protein_coding	protein_coding	WBGene00000099	0.4193	1121	GO:0006325; GO:0006468; GO:0007049; GO:0007052; GO:0007059; GO:0016310; GO:0018105; GO:0018107; GO:0030261; GO:0031991; GO:0032465; GO:0035404; GO:0045184; GO:0046777; GO:0051256; GO:0051257; GO:0051301; GO:0051321	GO:0000166; GO:0004672; GO:0004674; GO:0004712; GO:0005515; GO:0005524; GO:0016301; GO:0016740; GO:0019894; GO:0035174; GO:0051117; GO:0106310	GO:0000793; GO:0000794; GO:0005694; GO:0005737; GO:0005819; GO:0005856; GO:0005876; GO:0030496; GO:0031616; GO:0032133; GO:0051233	TRUE	4.51514	2.23583e-08	1.14949e-07	I	5937477	5938885	1409	+	356.245	377.182	315.672	20.6402	0	24.7523	17.3648	16.7633	16.7178	0.575801	0	0.764602
WBGene00002117	F52B11.6.1	ins-34	protein_coding	protein_coding	WBGene00002117	0.4337	475				FALSE	4.5086	0.0840221		IV	14106584	14107715	1132	+	3.85428	1.95431	8.67232	0	0	0	0.443379	0.204981	1.0839	0	0	0
WBGene00013553	Y75B8A.18a.1; Y75B8A.18b.1	Y75B8A.18	protein_coding	protein_coding	WBGene00013553	0.382	442				TRUE	4.50078	2.50776e-21	3.89764e-20	III	12225638	12226267	630	-	310.545	636.453	319.141	21.6722	15.8146	18.2952	38.3474	71.6584	42.8173	1.53163	1.1119	1.43169	5
WBGene00020786	T25B2.2a.1; T25B2.2a.2; T25B2.2b.1; T25B2.2b.2; T25B2.2c.1	T25B2.2	protein_coding	protein_coding	WBGene00020786	0.4394	1734				FALSE	4.49864	0.0203331		X	6169305	6173748	4444	+	3.30366	9.12011	15.6102	1.03201	0	0	0.104105	0.262038	0.534451	0.0186123	0	0
WBGene00021299	Y27F2A.8.1	Y27F2A.8	protein_coding	protein_coding	WBGene00021299	0.4142	618				FALSE	4.49238	0.207731		II	3183763	3184630	868	+	3.88888	0	9.77207	0	0	0	0.343844	0	0.938745	0	0	0
WBGene00017973	F32A6.2.1	ift-81	protein_coding	protein_coding	WBGene00017973	0.3976	2042	GO:0006935; GO:0035264; GO:0042073; GO:0050906; GO:0060271	GO:0005515; GO:0015631	GO:0005813; GO:0005929; GO:0030992; GO:0097730	TRUE	4.46598	0.000110871	0.000324816	X	5298561	5306328	7768	+	23.6763	67.098	244.559	4.12804	0	10.7619	0.633553	1.63707	7.11014	0.0632197	0	0.182498
WBGene00004402	Y116A8C.14a.1; Y116A8C.14b.1	rom-3	protein_coding	protein_coding	WBGene00004402	0.4542	2108	GO:0006508	GO:0004252	GO:0016020; GO:0016021	FALSE	4.45838	0.256065		IV	16965284	16970490	5207	-	0	13.6802	0	0	0	0	0	0.323322	0	0	0	0
WBGene00011340	T01G5.2.1	ugt-30	protein_coding	protein_coding	WBGene00011340	0.3624	1766		GO:0008194; GO:0015020; GO:0016740; GO:0016757	GO:0016020; GO:0016021; GO:0043231	FALSE	4.45838	0.256065		V	15121729	15125228	3500	-	0	13.6802	0	0	0	0	0	0.385935	0	0	0	0
WBGene00009758	F46B3.3a.1; F46B3.3b.1; F46B3.3c.1	ttr-11	protein_coding	protein_coding	WBGene00009758	0.4408	313			GO:0005576; GO:0009986	FALSE	4.45678	0.214785		V	20603366	20604378	1013	+	0	5.21149	8.67232	0	0	0	0	0.829528	1.6449	0	0	0
WBGene00022043	Y65B4BR.8.1	psf-3	protein_coding	protein_coding	WBGene00022043	0.415	735	GO:0006260; GO:1902975		GO:0000811; GO:0005634	TRUE	4.45598	8.88574e-11	5.96797e-10	I	534455	535344	890	+	153.07	218.231	107.537	8.25607	1.31788	11.8381	11.3796	14.7925	8.68598	0.351278	0.0557843	0.557723	5
WBGene00007062	Y59A8B.9.1	ebp-3	protein_coding	protein_coding	WBGene00007062	0.4894	564	GO:0031110; GO:0051225; GO:1904825	GO:0008017; GO:0051010	GO:0005737; GO:0005815; GO:0005856; GO:0005874; GO:0005881; GO:0035371; GO:0051233	FALSE	4.44548	0.257463		V	18055969	18060708	4740	+	0	0	14.4969	0	0	0	0	0	1.52597	0	0	0
WBGene00021017	W03G9.7.1	cil-7	protein_coding	protein_coding	WBGene00021017	0.398	1706			GO:0030424; GO:0030425; GO:0043025; GO:0097546; GO:0097730	FALSE	4.44548	0.257463		I	4986954	4989454	2501	-	0	0	13.8757	0	0	0	0	0	0.482865	0	0	0
WBGene00000413	Y54E10A.15.1	cdt-1	protein_coding	protein_coding	WBGene00000413	0.4081	2651	GO:0000076; GO:0000278; GO:0007049; GO:0030174; GO:0071163; GO:0110039	GO:0003677; GO:0005515; GO:0070182	GO:0000785; GO:0005634; GO:0005737	TRUE	4.44094	5.09069e-12	3.91589e-11	I	3223160	3228104	4945	-	2178.77	2814.86	2086.56	179.57	19.7682	125.914	44.9083	52.9005	46.7273	2.1183	0.231996	1.64471	5
WBGene00018768	F53G2.3.1	F53G2.3	protein_coding	protein_coding	WBGene00018768	0.4714	384				FALSE	4.44079	0.0995242		II	2480399	2481312	914	+	3.85428	1.30287	8.67232	0	0	0	0.54845	0.169038	1.34077	0	0	0
WBGene00012972	Y48A6B.11a.1; Y48A6B.11b.1	rsa-2	protein_coding	protein_coding	WBGene00012972	0.4835	2986	GO:0007049; GO:0007052; GO:0033365; GO:0048566	GO:0005515; GO:0008013; GO:0030674	GO:0005737; GO:0005813; GO:0005815; GO:0005856	TRUE	4.43776	1.2289e-34	4.39468e-33	III	11063479	11068753	5275	+	3885.66	5996.47	3767.26	238.394	134.424	256.133	71.1051	100.051	74.9006	2.49672	1.40059	2.97031	5
WBGene00044005	F37C12.18.1	F37C12.18	protein_coding	protein_coding	WBGene00044005	0.3755	783				FALSE	4.4341	0.219811		III	7194094	7195425	1332	-	3.30366	0	10.4068	0	0	0	0.230547	0	0.789049	0	0	0
WBGene00021648	Y47G6A.24a.1; Y47G6A.24a.2; Y47G6A.24b.1	mis-12	protein_coding	protein_coding	WBGene00021648	0.3802	754	GO:0051382		GO:0000776	TRUE	4.43258	5.54828e-07	2.38941e-06	I	3604520	3605763	1244	-	403.598	549.161	258.436	31.9923	0	23.6761	29.2213	36.2526	20.3295	1.32567	0	1.08633
WBGene00011434	T04D3.5.1; T04D3.5.2	T04D3.5	protein_coding	protein_coding	WBGene00011434	0.4428	1234				TRUE	4.40967	3.20594e-42	1.8596e-40	I	13329175	13330998	1824	-	1469.58	2496.31	1637.33	76.3687	96.2054	91.4759	65.0734	100.785	78.7719	1.93537	2.42553	2.56695	5
WBGene00012642	Y39A1A.2.1	Y39A1A.2	protein_coding	protein_coding	WBGene00012642	0.4123	667				FALSE	4.40964	0.0199018		III	10601905	10603566	1662	-	4.9555	9.12011	12.1412	0	0	1.07619	0.405963	0.681221	1.08065	0	0	0.0558711
WBGene00019432	K06A5.4.1	knl-2	protein_coding	protein_coding	WBGene00019432	0.4188	3018	GO:0007049; GO:0007059; GO:0051301; GO:0051321		GO:0000775; GO:0000776; GO:0005634; GO:0005694	TRUE	4.40785	4.55298e-24	8.62435e-23	I	6460433	6464286	3854	+	5569.43	9262.78	5829.53	391.131	159.464	421.865	100.836	152.91	114.674	4.05292	1.64386	4.84039	5
WBGene00021198	Y17G9B.1.1	npp-26	protein_coding	protein_coding	WBGene00021198	0.3968	1477				TRUE	4.40435	0.00719486	0.0143341	IV	4764748	4767839	3092	+	22.0244	8.46867	15.6102	2.06402	0	0	0.814798	0.285659	0.627446	0.0437016	0	0
WBGene00009457	F36A2.10.1	F36A2.10	protein_coding	protein_coding	WBGene00009457	0.4739	595				TRUE	4.40364	1.28979e-06	5.25407e-06	I	8819499	8820139	641	-	25.8787	61.8865	107.537	2.06402	3.95364	3.22856	2.37657	5.18194	10.7297	0.108483	0.20673	0.187896
WBGene00003154	Y17G7B.5a.1; Y17G7B.5a.2; Y17G7B.5b.1	mcm-2	protein_coding	protein_coding	WBGene00003154	0.4759	2119	GO:0000727; GO:0006260; GO:0006268; GO:0006270; GO:0007049; GO:0032508; GO:1902975; GO:1905775	GO:0000166; GO:0003677; GO:0003678; GO:0003697; GO:0004386; GO:0005524; GO:0016787; GO:0016887; GO:0017116; GO:0043138; GO:0046872	GO:0000793; GO:0005634; GO:0042555; GO:0045120	TRUE	4.40262	1.81631e-21	2.85963e-20	II	12001510	12006625	5116	-	3549.79	2928.21	1984.23	178.538	59.3046	161.428	91.5371	68.8469	55.5916	2.6349	0.870724	2.63799	5
WBGene00008609	F09B12.5.1	F09B12.5	protein_coding	protein_coding	WBGene00008609	0.4208	1155			GO:0005886	FALSE	4.39865	0.0211819		X	15084749	15088135	3387	+	3.85428	37.1319	5.20339	0	0	2.15237	0.182342	1.60169	0.267457	0	0	0.06453
WBGene00012650	Y39A1A.12.1; Y39A1A.12.2	orc-1	protein_coding	protein_coding	WBGene00012650	0.428	2105	GO:0006260; GO:0006270; GO:0033314	GO:0000166; GO:0003677; GO:0003688; GO:0005524; GO:0016887	GO:0005634; GO:0005664	TRUE	4.38853	1.79464e-15	1.86112e-14	III	10643002	10646107	3106	+	1344.04	1631.85	940.079	77.4007	18.4503	90.3997	34.8888	38.6225	26.5132	1.14989	0.272694	1.4871	5
WBGene00005146	H04J21.2.1	srd-69	protein_coding	protein_coding	WBGene00005146	0.4338	975			GO:0016020; GO:0016021	FALSE	4.38633	0.214827		III	2362948	2366278	3331	+	3.85428	9.12011	0	0	0	0	0.216005	0.466025	0	0	0	0
WBGene00001938	F22B3.1.1	his-64	protein_coding	protein_coding	WBGene00001938	0.4988	413	GO:0045944	GO:0003677; GO:0046982		TRUE	4.38278	1.76991e-17	2.15428e-16	IV	11407084	11407496	413	+	827.562	1637.85	711.12	27.9425	44.3308	79.7321	109.49	197.578	102.221	2.11582	3.33948	6.68511	5
WBGene00017265	F08F3.9a.1; F08F3.9b.1	snpc-1.3	protein_coding	protein_coding	WBGene00017265	0.443	1349	GO:0042795; GO:0042796	GO:0043565	GO:0019185	FALSE	4.36296	0.0864434		V	5437084	5439161	2078	-	1.10122	43.6462	0	0	0	2.15237	0.0446055	1.61194	0	0	0	0.0552499
WBGene00008643	F10B5.9.1	tmem-138	protein_coding	protein_coding	WBGene00008643	0.3259	583			GO:0005773; GO:0005774; GO:0005929; GO:0016020; GO:0016021; GO:0035869; GO:0042995	FALSE	4.35613	0.239418		II	8157362	8158045	684	+	0	2.60575	10.4068	0	0	0	0	0.222678	1.05973	0	0	0
WBGene00011069	R06F6.6.1	ceh-62	protein_coding	protein_coding	WBGene00011069	0.4059	1094	GO:0006357	GO:0003677	GO:0005634	FALSE	4.34953	0.103034		II	10805739	10808523	2785	+	2.75305	6.51436	3.46893	0	0	0	0.137506	0.296666	0.188247	0	0	0
WBGene00009368	F33H2.5.1	pole-1	protein_coding	protein_coding	WBGene00009368	0.4505	6562	GO:0000278; GO:0006260; GO:0006272; GO:0006281; GO:0006287; GO:0006297; GO:0044260; GO:0045004; GO:0071897; GO:0090305	GO:0000166; GO:0003676; GO:0003677; GO:0003887; GO:0008270; GO:0008310; GO:0016740; GO:0016779; GO:0046872; GO:0051536; GO:0051539	GO:0000228; GO:0005634; GO:0008622; GO:0042575	TRUE	4.34864	2.62554e-09	1.50423e-08	I	15005603	15013904	8302	-	2291.64	2154.95	1734.46	136.225	10.5431	156.047	19.0825	16.3612	15.692	0.649211	0.0499866	0.823465
WBGene00011431	T04D3.1.1	T04D3.1	protein_coding	protein_coding	WBGene00011431	0.4367	1493	GO:0006914		GO:0005737	TRUE	4.34802	0.0280512	0.0481473	I	13302759	13304311	1553	-	13.2147	7.81724	3.46893	1.03201	0	0	0.483639	0.26086	0.137938	0.0216167	0	0
WBGene00002297	T19E10.1a.1; T19E10.1a.2; T19E10.1b.1; T19E10.1b.2	ect-2	protein_coding	protein_coding	WBGene00002297	0.4336	3135	GO:0000281; GO:0007399; GO:0032880; GO:0032970; GO:0043547; GO:0045167; GO:0090630; GO:2000431	GO:0005085; GO:0005096; GO:0005515	GO:0005634; GO:0005737; GO:0005938	TRUE	4.34154	8.53098e-06	3.0311e-05	II	10778389	10783962	5574	-	788.474	1091.81	638.283	73.2726	0	50.5808	13.7428	17.3509	12.0872	0.730919	0	0.558693
WBGene00019426	K06A1.3.1	cutl-16	protein_coding	protein_coding	WBGene00019426	0.3936	1791			GO:0016020; GO:0016021	TRUE	4.3394	2.43616e-07	1.10036e-06	II	6441428	6443921	2494	+	243.921	167.419	346.893	16.5121	0	20.4476	7.44181	4.65718	11.4987	0.288319	0	0.395341
WBGene00010200	F57C7.4.1	F57C7.4	protein_coding	protein_coding	WBGene00010200	0.3849	4568			GO:0016020; GO:0016021	TRUE	4.33629	9.60349e-05	0.000284306	X	10581062	10589538	8477	-	132.697	103.578	180.384	1.03201	0	19.3714	1.58731	1.12968	2.34435	0.00706516	0	0.146845
WBGene00006775	F56A12.1.1	unc-39	protein_coding	protein_coding	WBGene00006775	0.4256	1008	GO:0001764; GO:0006357; GO:0007411; GO:0008078; GO:0018991; GO:0030334; GO:0040011; GO:0040017; GO:0110037	GO:0000978; GO:0000981; GO:0003677; GO:0005515	GO:0005634; GO:0005667	TRUE	4.33347	7.6715e-05	0.00023129	V	14373389	14375799	2411	+	43.4982	138.756	36.4237	2.06402	0	8.6095	2.35796	6.85811	2.14523	0.0640351	0	0.295762
WBGene00006974	M03D4.1a.1; M03D4.1b.1; M03D4.1c.1; M03D4.1d.1; M03D4.1d.2; M03D4.1e.1; M03D4.1f.1; M03D4.1f.2	zen-4	protein_coding	protein_coding	WBGene00006974	0.4132	2876	GO:0000070; GO:0007017; GO:0007018; GO:0031991; GO:0035046; GO:0040038; GO:0051256; GO:0051257	GO:0000166; GO:0003774; GO:0003777; GO:0005515; GO:0005524; GO:0008017; GO:0008574; GO:0016887; GO:0019901; GO:0042802	GO:0005634; GO:0005813; GO:0005871; GO:0005874; GO:0030496; GO:0032154; GO:0051233; GO:0097149; GO:1990023	TRUE	4.32431	9.92982e-35	3.60417e-33	IV	6118219	6121775	3557	+	873.268	1110.7	1113.53	48.5045	34.265	71.0284	16.5914	19.2407	22.9859	0.527421	0.370668	0.855203	5
WBGene00022511	ZC53.4.1	ZC53.4	protein_coding	protein_coding	WBGene00022511	0.2873	4233				FALSE	4.31591	0.120122		X	1925750	1937689	11940	+	2.75305	1.30287	8.67232	0	0	0	0.0355379	0.0153344	0.121629	0	0	0
WBGene00003839	T09A12.3a.1; T09A12.3b.1	ocr-2	protein_coding	protein_coding	WBGene00003839	0.3754	2146	GO:0006811; GO:0010286; GO:0034220; GO:0055085	GO:0005216; GO:0097604	GO:0005886; GO:0016020; GO:0016021; GO:0097730	FALSE	4.3136	0.109179		IV	8213826	8220036	6211	-	3.85428	0	20.8136	0	0	1.07619	0.0981383	0	0.575793	0	0	0.0173654
WBGene00019190	H12I13.1.1	H12I13.1	protein_coding	protein_coding	WBGene00019190	0.4201	2733	GO:0006468; GO:0006508; GO:0016579	GO:0000166; GO:0004672; GO:0004843; GO:0005524; GO:0008233; GO:0008234; GO:0016787		FALSE	4.30918	0.131822		II	6061977	6067166	5190	-	6.60733	0.651436	5.20339	0	0	0	0.132103	0.0118753	0.113031	0	0	0
WBGene00013033	Y49E10.10.1; Y49E10.10.2	Y49E10.10	protein_coding	protein_coding	WBGene00013033	0.5029	1358			GO:0016020; GO:0016021	FALSE	4.307	0.14328		III	12395465	12398983	3519	+	1.65183	0.651436	10.4068	0	0	0	0.0664648	0.0238993	0.454952	0	0	0
WBGene00194870	F53A2.11.1	F53A2.11	protein_coding	protein_coding	WBGene00194870	0.351	1362	GO:0006486; GO:0036065	GO:0008417; GO:0046920	GO:0016020	FALSE	4.307	0.14328		III	13319265	13321892	2628	-	1.65183	0.651436	10.4068	0	0	0	0.0662696	0.0238291	0.453616	0	0	0
WBGene00021396	Y38C1AA.5a.1; Y38C1AA.5b.1	cutl-24	protein_coding	protein_coding	WBGene00021396	0.4624	2019			GO:0016020; GO:0016021	TRUE	4.30109	6.77209e-16	7.29112e-15	IV	165077	169980	4904	+	2276.78	3094.97	5416.73	74.3046	202.954	270.123	61.6183	76.372	159.276	1.15092	3.12741	4.63287	5
WBGene00001608	R07B1.8.1	R07B1.8	protein_coding	protein_coding	WBGene00001608	0.4099	1415				TRUE	4.2932	0.0115899	0.0219264	X	9870804	9872654	1851	-	47.9031	1902.85	41.6271	7.22406	15.8146	78.5617	1.84984	66.9978	1.7465	0.159658	0.347716	1.92256
WBGene00045501	Y6G8.8.1	Y6G8.8	protein_coding	protein_coding	WBGene00045501	0.3706	1206				FALSE	4.2844	0.264001		V	17620566	17622750	2185	+	0	10.423	1.73446	0	0	0	0	0.430584	0.0853822	0	0	0
WBGene00001901	K06C4.13.1	his-27	protein_coding	protein_coding	WBGene00001901	0.5572	411		GO:0003677; GO:0046982	GO:0000786	TRUE	4.28308	0.000161611	0.0004598	V	8890038	8890448	411	+	118.422	206.475	41.4287	0	2.39044	15.6328	15.744	25.0287	5.98424	0	0.18095	1.31711
WBGene00001923	F07B7.5.1	his-49	protein_coding	protein_coding	WBGene00001923	0.5572	411		GO:0003677; GO:0046982	GO:0000786	TRUE	4.28308	0.000161611	0.0004598	V	8847943	8848353	411	+	118.422	206.475	41.4287	0	2.39044	15.6328	15.744	25.0287	5.98424	0	0.18095	1.31711
WBGene00001210	K11G9.4.1	egl-46	protein_coding	protein_coding	WBGene00001210	0.4408	1207	GO:0000122; GO:0001764; GO:0007411; GO:0010564; GO:0030182; GO:0031536; GO:0045165; GO:0055057	GO:0000978; GO:0000981; GO:0001227; GO:0003700; GO:0061629	GO:0005634; GO:0017053	TRUE	4.27597	5.2395e-16	5.69672e-15	V	6679317	6681573	2257	-	491.145	418.222	1115.26	21.6722	34.2649	48.4284	22.2345	17.2629	54.8552	0.561514	0.883213	1.38937	5
WBGene00010586	K05C4.10.1	K05C4.10	protein_coding	protein_coding	WBGene00010586	0.3996	543			GO:0016020; GO:0016021	FALSE	4.27531	0.122005		I	14725296	14726131	836	+	4.40489	5.86293	1.73446	0	0	0	0.443262	0.537933	0.189633	0	0	0
WBGene00001609	F02A9.6.1	glp-1	protein_coding	protein_coding	WBGene00001609	0.4196	4326	GO:0001555; GO:0001708; GO:0002119; GO:0006357; GO:0007219; GO:0007275; GO:0007349; GO:0009880; GO:0010468; GO:0010608; GO:0030154; GO:0043055; GO:0043282; GO:0045944; GO:0099636; GO:1905936; GO:1905938; GO:2000648; GO:2000737	GO:0003713; GO:0004888; GO:0005509; GO:0061629	GO:0005634; GO:0005737; GO:0005829; GO:0005886; GO:0012505; GO:0016020; GO:0016021; GO:0016328; GO:0030424; GO:0042995; GO:0044214; GO:0090575	TRUE	4.27479	2.34701e-13	2.05139e-12	III	9092241	9099698	7458	+	2762.96	2532.78	2429.98	208.466	31.6292	158.2	34.8991	29.1693	33.3477	1.507	0.22747	1.26632	5
WBGene00008641	F10B5.5.1	pch-2	protein_coding	protein_coding	WBGene00008641	0.382	1377	GO:0007131; GO:0051321; GO:0051598	GO:0000166; GO:0005524; GO:0016887	GO:0000776; GO:0005634; GO:0005694	TRUE	4.27468	2.48329e-08	1.26811e-07	II	8158349	8159925	1577	+	214.188	214.974	130.085	20.6402	1.31788	6.45712	8.49935	7.77796	5.60844	0.468753	0.0297759	0.162379
WBGene00011546	T06G6.4.1	T06G6.4	protein_coding	protein_coding	WBGene00011546	0.418	1091				TRUE	4.2732	2.21005e-32	6.69812e-31	I	12712158	12714722	2565	-	765.349	606.487	555.028	44.3764	30.3113	24.7523	38.3319	27.6956	30.2023	1.27201	0.864376	0.785627	5
WBGene00020825	T26A8.2.1	tmem-231	protein_coding	protein_coding	WBGene00020825	0.3683	1409	GO:0032880; GO:0060271; GO:1905515	GO:0003674	GO:0005886; GO:0016020; GO:0016021; GO:0035869; GO:0042995; GO:0060170	TRUE	4.27117	1.1616e-07	5.48153e-07	IV	8424278	8428512	4235	+	87.5471	130.939	556.763	16.5121	17.1325	6.45712	3.39513	4.62989	23.4589	0.366486	0.378296	0.158691
WBGene00001820	F53B2.6.1	ham-1	protein_coding	protein_coding	WBGene00001820	0.4721	1826	GO:0001709; GO:0001764; GO:0006357; GO:0045167; GO:0045944; GO:0051653; GO:0055059; GO:1990179	GO:0000977; GO:0001228	GO:0005634; GO:0005737; GO:0005938	TRUE	4.26454	1.833e-28	4.47113e-27	IV	12542034	12545729	3696	+	3361.48	4826.49	3885.2	137.257	318.927	173.266	100.59	131.687	126.317	2.35071	5.43393	3.28578	5
WBGene00018377	F43C9.3.1	hum-10	protein_coding	protein_coding	WBGene00018377	0.3899	2562		GO:0000166; GO:0003774; GO:0005515; GO:0005524	GO:0016459	FALSE	4.24951	0.279371		X	4777512	4782297	4786	-	0	0	12.1412	0	0	0	0	0	0.281341	0	0	0
WBGene00020046	R13A1.9.1	best-16	protein_coding	protein_coding	WBGene00020046	0.3718	1544	GO:0006811; GO:0006821	GO:0005254	GO:0005886; GO:0016020; GO:0016021; GO:0034707	FALSE	4.24951	0.279371		IV	7193520	7195834	2315	-	0	0	12.1412	0	0	0	0	0	0.466837	0	0	0
WBGene00045297	C16A11.9.1	fbxc-43	protein_coding	protein_coding	WBGene00045297	0.4074	837				FALSE	4.24892	0.114651		II	4234950	4235982	1033	-	3.85428	4.56006	3.46893	0	0	0	0.251619	0.27143	0.246048	0	0	0
WBGene00001934	F55G1.11.1	his-60	protein_coding	protein_coding	WBGene00001934	0.4657	466		GO:0003677; GO:0046982		TRUE	4.24821	1.73205e-19	2.39699e-18	IV	7487560	7488025	466	-	1573.99	3715.75	1313.79	101.374	98.635	147.011	184.562	397.259	167.374	6.80306	6.58519	10.9242	5
WBGene00008113	C46C2.5.1	C46C2.5	protein_coding	protein_coding	WBGene00008113	0.3249	714				TRUE	4.24573	0.0619655	0.096606	IV	9191639	9192622	984	-	19.2714	20.846	0	2.06402	0	0	1.47482	1.45458	0	0.0904024	0	0
WBGene00017189	F07B7.8.1	F07B7.8	protein_coding	protein_coding	WBGene00017189	0.3575	537				FALSE	4.24056	0.149883		V	8846203	8846835	633	-	0.550611	7.49152	2.6017	0	0	0	0.0560268	0.695039	0.287628	0	0	0
WBGene00019442	K06C4.1.1	K06C4.1	protein_coding	protein_coding	WBGene00019442	0.3575	537				FALSE	4.24056	0.149883		V	8888298	8888930	633	-	0.550611	7.49152	2.6017	0	0	0	0.0560268	0.695039	0.287628	0	0	0
WBGene00001940	H02I12.6.1	his-66	protein_coding	protein_coding	WBGene00001940	0.49	502		GO:0003677; GO:0046982	GO:0000786	TRUE	4.23922	6.37168e-14	5.91454e-13	IV	11400311	11400812	502	-	593.905	547.728	236.107	13.1969	20.2983	39.7911	64.6456	54.3595	27.9225	0.822117	1.25799	2.74478	5
WBGene00001920	B0035.9.1	his-46	protein_coding	protein_coding	WBGene00001920	0.5385	312		GO:0003677; GO:0046982		TRUE	4.23403	2.43807e-17	2.93222e-16	IV	11326018	11326329	312	-	269.383	502.921	217.295	17.8486	14.1688	20.6298	47.1782	80.3079	41.3471	1.78902	1.41287	2.28963	5
WBGene00001930	F54E12.3.1	his-56	protein_coding	protein_coding	WBGene00001930	0.5385	312		GO:0003677; GO:0046982		TRUE	4.23403	2.43807e-17	2.93222e-16	IV	11338522	11338833	312	+	269.383	502.921	217.295	17.8486	14.1688	20.6298	47.1782	80.3079	41.3471	1.78902	1.41287	2.28963	5
WBGene00023515	F08H9.12.1	srz-97	protein_coding	protein_coding	WBGene00023515	0.294	864			GO:0016020; GO:0016021	TRUE	4.22414	0.033952	0.057032	V	14465095	14468246	3152	-	9.91099	9.12011	3.46893	1.03201	0	0	0.6268	0.525896	0.238359	0.0373538	0	0
WBGene00014186	ZK1025.6.1	nhr-244	protein_coding	protein_coding	WBGene00014186	0.4253	522			GO:0005634	FALSE	4.20903	0.0831319		I	11454780	11455450	671	+	0	3.65269	67.3156	0	4.11167	0	0	0.348623	7.65587	0	0.245059	0
WBGene00050892	F46B3.18.1	ttr-57	protein_coding	protein_coding	WBGene00050892	0.4175	491			GO:0009986	FALSE	4.20706	0.154758		V	20605105	20606331	1227	+	0.550611	2.60575	8.67232	0	0	0	0.0612758	0.264402	1.04858	0	0	0
WBGene00008433	D2089.2.1	marc-2	protein_coding	protein_coding	WBGene00008433	0.4028	643	GO:0000209; GO:0016567	GO:0004842; GO:0008270; GO:0046872	GO:0016020; GO:0016021	FALSE	4.20578	0.0310721		II	10660225	10660959	735	-	9.36038	4.56006	8.67232	0	0	1.07619	0.795441	0.353324	0.800707	0	0	0.0579565
WBGene00006187	ZC513.11.1	str-138	protein_coding	protein_coding	WBGene00006187	0.3343	987	GO:0007186; GO:0042048; GO:0050911	GO:0038022	GO:0005887; GO:0016020; GO:0016021	TRUE	4.20521	0.0284956	0.0488133	V	8058659	8060317	1659	+	7.70855	7.81724	6.93786	0	1.31788	0	0.426757	0.394593	0.417309	0	0.0415415	0
WBGene00017414	F13A2.5a.1; F13A2.5b.1	F13A2.5	protein_coding	protein_coding	WBGene00017414	0.453	465				FALSE	4.20253	0.0360312		V	4401298	4401940	643	-	3.85428	5.21149	13.8757	1.03201	0	0	0.452914	0.558371	1.77154	0.0694057	0	0
WBGene00012431	Y11D7A.7.1	Y11D7A.7	protein_coding	protein_coding	WBGene00012431	0.3714	840				TRUE	4.19306	0.0131325	0.0244856	IV	9249523	9250459	937	+	7.15794	19.5431	13.8757	0	0	2.15237	0.465623	1.15912	0.980675	0	0	0.0887287
WBGene00007315	C04H5.7a.1; C04H5.7a.2; C04H5.7b.1	C04H5.7	protein_coding	protein_coding	WBGene00007315	0.3798	723				FALSE	4.1915	0.126612		II	14537946	14539162	1217	+	2.75306	5.21149	3.46893	0	0	0	0.208067	0.359118	0.284843	0	0	0
WBGene00001689	C38C10.4.1	gpr-2	protein_coding	protein_coding	WBGene00001689	0.4218	1740	GO:0007049; GO:0050790; GO:0051301	GO:0005092; GO:0030695	GO:0005737; GO:0005818; GO:0005819; GO:0005856; GO:0005938	TRUE	4.1895	2.43882e-06	9.48232e-06	III	9391270	9393164	1895	-	437.178	416.601	291.026	25.4267	0	36.3532	13.7289	11.9285	9.92959	0.45699	0	0.723467
WBGene00013713	Y106G6G.4.1	Y106G6G.4	protein_coding	protein_coding	WBGene00013713	0.4334	1119			GO:0016020; GO:0016021	TRUE	4.18664	2.40373e-08	1.23007e-07	I	10321711	10323398	1688	-	115.078	85.9896	48.565	2.06402	6.58941	5.38094	5.61935	3.82851	2.57657	0.0576831	0.183206	0.166515
WBGene00016625	C44B7.3.1	aff-1	protein_coding	protein_coding	WBGene00016625	0.3738	1977	GO:0000768; GO:0007275; GO:0046662		GO:0005576; GO:0005886; GO:0016020; GO:0016021; GO:0016324; GO:0043229; GO:0044291	TRUE	4.18145	4.52115e-45	3.1142e-43	II	6860582	6863752	3171	-	879.325	760.878	712.865	46.4404	34.2649	48.4284	24.3035	19.1744	21.4067	0.734605	0.53922	0.848241	5
WBGene00020691	T22E5.3.1	igdb-3	protein_coding	protein_coding	WBGene00020691	0.3975	1849	GO:0007156; GO:0007416; GO:0010842		GO:0045202	TRUE	4.17851	2.14485e-20	3.13277e-19	X	6385280	6387863	2584	+	563.275	572.613	359.034	18.5762	43.4901	21.5237	16.646	15.429	11.5278	0.314184	0.731773	0.403094	5
WBGene00008937	F18E2.4.1	srt-43	protein_coding	protein_coding	WBGene00008937	0.3978	1008			GO:0016020; GO:0016021	FALSE	4.16984	0.273092		V	12769268	12770845	1578	+	2.75305	0	8.67232	0	0	0	0.149238	0	0.510768	0	0	0
WBGene00000264	C36A4.8a.1; C36A4.8b.1	brc-1	protein_coding	protein_coding	WBGene00000264	0.3901	1988	GO:0000070; GO:0000724; GO:0006281; GO:0006289; GO:0006915; GO:0006974; GO:0007049; GO:0009792; GO:0016567; GO:0035066; GO:0035067; GO:0045717; GO:0045944; GO:0051307; GO:0071479	GO:0004842; GO:0005515; GO:0016740; GO:0046872; GO:0061630	GO:0005634; GO:0005694; GO:0005737; GO:0005886; GO:0031436; GO:0070531	TRUE	4.16845	6.31815e-07	2.69416e-06	III	3853026	3862958	9933	-	187.758	179.145	148.895	19.6082	0	8.6095	5.1607	4.48954	4.44644	0.308451	0	0.149964
WBGene00045048	D1007.19.1	D1007.19	protein_coding	protein_coding	WBGene00045048	0.3712	520				TRUE	4.16789	0.00851034	0.0166405	I	4589380	4589899	520	-	16.5183	18.8917	5.20339	1.03201	1.31788	0	1.73575	1.81001	0.594063	0.0620647	0.078849	0
WBGene00008092	C44F1.2.1	gmeb-3	protein_coding	protein_coding	WBGene00008092	0.4229	1251	GO:0045944	GO:0000978; GO:0001228; GO:0003677; GO:0005515; GO:0046872		FALSE	4.16285	0.272032		III	3768500	3770321	1822	+	6.05672	0	5.20339	0	0	0	0.264549	0	0.246933	0	0	0
WBGene00019956	R08C7.13.1	fbxb-75	protein_coding	protein_coding	WBGene00019956	0.369	1187				FALSE	4.16285	0.272032		IV	4439816	4441177	1362	-	6.05672	0	5.20339	0	0	0	0.278812	0	0.260247	0	0	0
WBGene00012236	W04A8.1a.1; W04A8.1b.1	W04A8.1	protein_coding	protein_coding	WBGene00012236	0.4408	2160	GO:0070940	GO:0008420		TRUE	4.16226	8.28316e-12	6.23319e-11	I	13835292	13840047	4756	-	449.298	1152.39	473.509	51.6004	13.1788	50.5808	11.366	26.5803	13.0144	0.747076	0.189822	0.810882	5
WBGene00004028	Y18H1A.6a.1; Y18H1A.6b.1; Y18H1A.6c.1; Y18H1A.6d.1	pif-1	protein_coding	protein_coding	WBGene00004028	0.47	1790	GO:0000002; GO:0000723; GO:0006260; GO:0006281; GO:0006310; GO:0006974; GO:0032508	GO:0000166; GO:0003677; GO:0003678; GO:0004386; GO:0005524; GO:0016787; GO:0016887; GO:0043139	GO:0005634; GO:0005657; GO:0005739	TRUE	4.16072	3.50414e-05	0.000112771	I	719929	731078	11150	+	328.714	880.326	424.944	62.2138	0	28.5797	10.0344	24.5021	14.0938	1.08692	0	0.55288
WBGene00016295	C32B5.1a.1; C32B5.1b.1; C32B5.1c.1	fbxc-40	protein_coding	protein_coding	WBGene00016295	0.4054	1212				TRUE	4.15805	7.32106e-20	1.03201e-18	II	986003	988666	2664	+	1358.38	1463.97	1321.86	73.2726	34.2649	123.821	61.2414	60.1788	64.7491	1.89062	0.87957	3.53766	5
WBGene00021716	Y49F6B.3.1	fbxb-112	protein_coding	protein_coding	WBGene00021716	0.3634	930				FALSE	4.15574	0.290293		II	3491179	3492881	1703	+	0	11.0744	0	0	0	0	0	0.593269	0	0	0	0
WBGene00005611	R09B5.7a.1; R09B5.7b.1	srj-23	protein_coding	protein_coding	WBGene00005611	0.4054	879			GO:0016020; GO:0016021	FALSE	4.15378	0.122668		V	1451634	1454340	2707	+	0	9.77155	12.1412	0	0	1.07619	0	0.553845	0.820019	0	0	0.042396
WBGene00022441	Y110A2AL.4a.1; Y110A2AL.4b.1	Y110A2AL.4	protein_coding	protein_coding	WBGene00022441	0.4492	822				TRUE	4.15285	1.86479e-08	9.6569e-08	II	2839304	2840386	1083	+	390.859	426.462	1018.72	24.1804	8.1451	70.6825	25.9663	25.832	73.5308	0.919374	0.308094	2.97578
WBGene00003422	Y47G6A.11.1	msh-6	protein_coding	protein_coding	WBGene00003422	0.42	3667	GO:0006281; GO:0006298; GO:0006974; GO:0043570	GO:0000166; GO:0000400; GO:0003677; GO:0003690; GO:0005524; GO:0030983	GO:0005634; GO:0032301	TRUE	4.15253	1.27296e-39	6.22264e-38	I	3449326	3462177	12852	+	1694.78	1882	1928.72	93.9128	73.8014	140.981	25.2539	25.5695	31.2254	0.800901	0.626148	1.33129	5
WBGene00015766	C14C11.2.1; C14C11.2.2	C14C11.2	protein_coding	protein_coding	WBGene00015766	0.4166	1928				TRUE	4.1524	6.73704e-27	1.50411e-25	V	5660928	5663473	2546	+	1311.46	1139.66	1793.53	53.9367	115.974	69.9522	37.1683	29.4498	55.227	0.874867	1.87144	1.25638	5
WBGene00015175	B0414.1.1	srz-4	protein_coding	protein_coding	WBGene00015175	0.3418	1059			GO:0016020; GO:0016021	TRUE	4.15233	0.000102275	0.000301382	I	5801872	5803266	1395	+	54.5105	20.846	41.6271	2.06402	0	4.30475	2.81261	0.980708	2.33362	0.0609512	0	0.140759
WBGene00077756	Y11D7A.19.1	Y11D7A.19	protein_coding	protein_coding	WBGene00077756	0.3971	700				FALSE	4.14915	0.131878		IV	9265810	9266561	752	-	2.75305	3.25718	5.20339	0	0	0	0.214903	0.231824	0.441304	0	0	0
WBGene00012523	Y32B12B.3.1	srbc-65	protein_coding	protein_coding	WBGene00012523	0.3556	852			GO:0016020; GO:0016021	FALSE	4.14473	0.150024		V	16550980	16552282	1303	+	1.10122	6.51436	3.46893	0	0	0	0.0706254	0.380931	0.241716	0	0	0
WBGene00013404	Y63D3A.3.1	fbxb-101	protein_coding	protein_coding	WBGene00013404	0.4025	969				TRUE	4.14197	2.64062e-13	2.29643e-12	I	14088094	14089858	1765	+	542.352	720.489	1547.14	42.3124	88.2981	29.0571	30.5832	37.0439	94.7885	1.36555	2.83498	1.03837	5
WBGene00003156	Y39G10AR.14a.1; Y39G10AR.14a.2; Y39G10AR.14b.1	mcm-4	protein_coding	protein_coding	WBGene00003156	0.4713	1894	GO:0000003; GO:0000727; GO:0006260; GO:0006268; GO:0006270; GO:0006271; GO:0007049; GO:0007399; GO:0008406; GO:0032508; GO:0040011; GO:1902975	GO:0000166; GO:0003677; GO:0003678; GO:0003697; GO:0004386; GO:0005515; GO:0005524; GO:0016787; GO:0016887; GO:0017116; GO:0046872	GO:0005634; GO:0005694; GO:0042555	TRUE	4.14139	2.61772e-23	4.77211e-22	I	2318291	2321847	3557	-	5966.97	6787.97	4624.09	433.444	160.782	389.579	172.147	178.556	144.942	7.15678	2.64107	7.12265	5
WBGene00001958	C18A3.8.1	hlh-14	protein_coding	protein_coding	WBGene00001958	0.3868	680	GO:0000003; GO:0001764; GO:0002119; GO:0006357; GO:0007399; GO:0009786; GO:0010171; GO:0014018; GO:0018991; GO:0040010; GO:0040011; GO:0045664; GO:0045944	GO:0000977; GO:0000981; GO:0003677; GO:0003700; GO:0043565; GO:0046983	GO:0005634; GO:0090575	TRUE	4.13895	6.28058e-05	0.000192758	II	5737790	5738888	1099	-	91.952	114.653	333.017	23.7362	0	6.45712	7.38887	8.40019	29.0741	1.09161	0	0.328818
WBGene00000451	C33D12.7.1; C33D12.7.2	ceh-30	protein_coding	protein_coding	WBGene00000451	0.4388	961	GO:0006357; GO:0007399; GO:0007548; GO:0030154; GO:0043066	GO:0000977; GO:0000981; GO:0003674; GO:0003677	GO:0005634	TRUE	4.13706	1.91707e-08	9.91496e-08	X	3063585	3065551	1967	+	60.5672	115.304	175.181	5.16004	11.8609	3.22856	3.44381	5.97772	10.8221	0.167917	0.383989	0.116335
WBGene00000411	R06F6.1.1	cdl-1	protein_coding	protein_coding	WBGene00000411	0.4394	1600	GO:0006397; GO:0006398; GO:0006915; GO:0007076; GO:0009792; GO:0051028	GO:0003723; GO:0003729; GO:0003730; GO:0071207	GO:0005634; GO:0005737; GO:0071204	TRUE	4.1353	3.18933e-30	8.59206e-29	II	10785452	10787272	1821	+	1919.43	2388.82	1654.68	164.089	83.0265	91.4759	65.5507	74.3835	61.3964	3.2072	1.61443	1.97976	5
WBGene00001833	Y110A7A.1a.1; Y110A7A.1b.1	hcp-6	protein_coding	protein_coding	WBGene00001833	0.4204	5286	GO:0000070; GO:0007049; GO:0007076; GO:0009792; GO:0010032; GO:0030261; GO:0051301; GO:0051315	GO:0003682; GO:0042393	GO:0000779; GO:0000793; GO:0000796; GO:0005634; GO:0005654	TRUE	4.12158	9.37776e-42	5.19117e-40	I	5165152	5171313	6162	+	1621.55	1678.75	1706.71	117.649	63.2583	105.466	16.7621	15.8224	19.1682	0.696027	0.372318	0.690895	5
WBGene00003885	Y41G9A.1.1	osm-5	protein_coding	protein_coding	WBGene00003885	0.4274	2487	GO:0006970; GO:0035641; GO:0042073; GO:0043053; GO:0050921; GO:0060271; GO:1905515	GO:0003674; GO:0019894	GO:0005814; GO:0030992; GO:0036064; GO:0043005; GO:0097546; GO:0097730	TRUE	4.12097	4.02521e-07	1.77317e-06	X	2984278	2991375	7098	+	150.317	220.186	858.56	7.22406	42.1722	21.5237	3.30261	4.41089	20.4948	0.0908386	0.527562	0.299687
WBGene00017406	F12E12.5.1	sdz-12	protein_coding	protein_coding	WBGene00017406	0.4602	993	GO:0006357	GO:0000978; GO:0003700; GO:0046872		FALSE	4.10065	0.169932		II	3730152	3731548	1397	-	6.60733	0.651436	3.46893	0	0	0	0.363582	0.0326841	0.207394	0	0	0
WBGene00004149	T16A1.7.1	trpl-5	protein_coding	protein_coding	WBGene00004149	0.4093	1698	GO:0098655	GO:0005261	GO:0005887; GO:0016020; GO:0016021	FALSE	4.09653	0.29034		II	2086719	2090618	3900	-	2.20244	0	8.67232	0	0	0	0.0708749	0	0.303212	0	0	0
WBGene00002150	M02A10.2a.1; M02A10.2b.1; M02A10.2c.1; M02A10.2d.1; M02A10.2e.1; M02A10.2f.1	irk-2	protein_coding	protein_coding	WBGene00002150	0.4157	1694	GO:0006811; GO:0006813; GO:0034765; GO:1990573	GO:0005242; GO:0005244	GO:0005886; GO:0016020; GO:0016021	TRUE	4.08364	4.69225e-19	6.28554e-18	X	703029	714478	11450	-	1138.66	1001.91	855.09	45.4084	100.159	32.2856	36.7288	29.4665	29.9673	0.838277	1.8395	0.659965	5
WBGene00077439	F55B12.10.1	F55B12.10	protein_coding	protein_coding	WBGene00077439	0.5159	252				TRUE	4.07857	0.000203542	0.00056686	V	13839769	13840281	513	+	26.9799	31.269	17.3446	1.03201	1.31788	2.15237	5.85013	6.18196	4.08615	0.12807	0.162704	0.295762
WBGene00020136	T01B6.4.1	nlp-45	protein_coding	protein_coding	WBGene00020136	0.4498	598	GO:0007218			TRUE	4.07711	0.0163582	0.0298121	X	2337656	2338306	651	-	8.80977	43.6462	1.73446	2.06402	0	1.07619	0.804987	3.6363	0.172192	0.107939	0	0.0623178
WBGene00020196	T03G11.3.1	T03G11.3	protein_coding	protein_coding	WBGene00020196	0.455	1244		GO:0046872		TRUE	4.06624	0.000248578	0.000681266	X	5174369	5177506	3138	+	14.8665	31.269	128.35	1.03201	3.95364	5.38094	0.653001	1.25229	6.12528	0.0259435	0.0988782	0.149783
WBGene00012198	W02B8.2.1	W02B8.2	protein_coding	protein_coding	WBGene00012198	0.4662	3910	GO:0018107; GO:0031032; GO:0035556	GO:0004674	GO:0005737; GO:0005856	TRUE	4.06226	8.70507e-20	1.22285e-18	II	13908921	13915254	6334	+	597.413	846.216	405.865	28.8962	28.9934	52.7332	8.34878	10.7825	6.16245	0.231116	0.230699	0.467017	5
WBGene00000865	ZC168.4.1; ZC168.4.2; ZC168.4.3; ZC168.4.4	cyb-1	protein_coding	protein_coding	WBGene00000865	0.4385	1542	GO:0000079; GO:0000278; GO:0001556; GO:0001934; GO:0007049; GO:0044772; GO:0051301	GO:0005515; GO:0016538; GO:0031625	GO:0000307; GO:0005634; GO:0005737; GO:0005813	TRUE	4.05639	4.49936e-25	8.95661e-24	IV	10735259	10737177	1919	+	811.597	1676.14	855.091	66.0486	67.212	67.7998	28.7595	54.1552	32.9213	1.3395	1.35608	1.52254	5
WBGene00000584	R03C1.3a.1; R03C1.3b.1	cog-1	protein_coding	protein_coding	WBGene00000584	0.4538	1022	GO:0003388; GO:0006357; GO:0007368; GO:0007389; GO:0008406; GO:0010628; GO:0010629; GO:0018991; GO:0030154	GO:0000978; GO:0000981; GO:0003677; GO:0140297	GO:0005634	TRUE	4.05174	2.07576e-05	6.96883e-05	II	14902493	14907533	5041	+	399.743	118.562	218.542	26.8322	0	17.219	21.3725	5.77972	12.695	0.821052	0	0.583423
WBGene00002228	C06G3.2.1	klp-18	protein_coding	protein_coding	WBGene00002228	0.452	3197	GO:0007018; GO:0090306	GO:0000166; GO:0003774; GO:0003777; GO:0005524; GO:0008017; GO:0016887	GO:0000922; GO:0005871; GO:0005874; GO:0005938	TRUE	4.04718	2.30804e-14	2.21014e-13	IV	7040211	7043694	3484	+	530.789	795.404	378.113	18.5762	26.3576	58.1141	9.07203	12.3953	7.02147	0.18171	0.2565	0.629455	5
WBGene00015716	C12D12.5a.1; C12D12.5b.1	sox-4	protein_coding	protein_coding	WBGene00015716	0.416	950	GO:0006355; GO:0006357; GO:0009653; GO:0030154; GO:0045087	GO:0000978; GO:0000981; GO:0003677	GO:0005634	TRUE	4.04192	0.0580373	0.0913037	X	3505286	3511529	6244	-	8.25916	9.77155	1.73446	1.03201	0	0	0.474799	0.512183	0.108333	0.0339544	0	0
WBGene00001553	F57F5.2a.1; F57F5.2b.1; F57F5.2c.1	gcy-33	protein_coding	protein_coding	WBGene00001553	0.382	2304	GO:0006182; GO:0007635; GO:0009190; GO:0019934; GO:0035556; GO:0038060; GO:0050896; GO:0050913; GO:0070482	GO:0000166; GO:0004383; GO:0005525; GO:0016829; GO:0019826; GO:0020037; GO:0046872; GO:0070026; GO:0070027	GO:0005737; GO:0008074	TRUE	4.03614	0.00507907	0.0104717	V	11995868	12001965	6098	-	28.0811	89.2468	20.8136	8.25607	0	0	0.665975	1.92985	0.536307	0.112061	0	0
WBGene00003018	T14F9.5.1	lin-32	protein_coding	protein_coding	WBGene00003018	0.4528	466	GO:0003398; GO:0006357; GO:0007399; GO:0007568; GO:0009792; GO:0014014; GO:0021780; GO:0030154; GO:0030182; GO:0045138; GO:0048665; GO:0048666; GO:0051179	GO:0000978; GO:0000981; GO:0003677; GO:0042803; GO:0043565; GO:0046982; GO:0046983	GO:0005634	TRUE	4.03416	7.65295e-06	2.74325e-05	X	2229208	2230122	915	-	79.2879	62.5379	171.712	1.03201	3.95364	13.9904	9.29709	6.68607	21.8758	0.0692568	0.263958	1.03961
WBGene00021661	Y48G1A.6a.1; Y48G1A.6b.1	mbtr-1	protein_coding	protein_coding	WBGene00021661	0.4232	2196	GO:0006355; GO:0045892	GO:0003682; GO:0042393	GO:0005634	TRUE	4.03391	1.16283e-13	1.05359e-12	I	343069	348424	5356	-	438.286	926.342	452.695	54.6965	15.8146	39.8189	10.9056	21.0161	12.2383	0.778918	0.224052	0.627889	5
WBGene00010800	M01B2.7.1	srsx-37	protein_coding	protein_coding	WBGene00010800	0.3905	909	GO:0007186	GO:0004930	GO:0016020; GO:0016021	FALSE	4.03201	0.163972		V	15257581	15259149	1569	-	3.85428	4.56006	1.73446	0	0	0	0.231688	0.249931	0.113279	0	0	0
WBGene00022728	ZK402.1.1	ZK402.1	protein_coding	protein_coding	WBGene00022728	0.4284	789				FALSE	4.03201	0.163972		X	1404271	1406101	1831	+	3.89818	4.65261	1.81595	0	0	0	0.269967	0.293787	0.136639	0	0	0
WBGene00007303	C04F12.9.1; C04F12.9.2	rnh-1.3	protein_coding	protein_coding	WBGene00007303	0.4651	500	GO:0043137; GO:0090502	GO:0003676; GO:0004523		TRUE	4.0313	8.14248e-10	4.94546e-09	I	9710093	9710767	675	-	102.964	97.0638	105.802	7.22406	1.31788	9.68568	11.2523	9.67165	12.5624	0.451831	0.082003	0.670789	1
WBGene00005670	C28C12.13.1	sru-7	protein_coding	protein_coding	WBGene00005670	0.3483	999			GO:0016020; GO:0016021	FALSE	4.03114	0.305252		IV	8492542	8494487	1946	+	0	8.46867	1.73446	0	0	0	0	0.422341	0.103074	0	0	0
WBGene00020205	T04B8.3a.1; T04B8.3b.1	arrd-1	protein_coding	protein_coding	WBGene00020205	0.4098	929	GO:0015031		GO:0005737	TRUE	4.02394	0.00220248	0.00493907	II	627506	628662	1157	+	30.2836	54.0692	53.7684	8.25607	0	0	1.78026	2.89811	3.43421	0.277772	0	0
WBGene00012010	T25B9.4.1	T25B9.4	protein_coding	protein_coding	WBGene00012010	0.3929	1685	GO:0006468; GO:0007169; GO:0016310; GO:0018108; GO:0030154; GO:0045087	GO:0000166; GO:0004672; GO:0004712; GO:0004713; GO:0004715; GO:0005102; GO:0005524; GO:0016301; GO:0016740	GO:0031234	FALSE	4.02291	0.153753		IV	10755760	10757716	1957	-	0	16.2859	3.46893	1.03201	0	0	0	0.481533	0.122221	0.0191535	0	0
WBGene00016370	C33H5.1.1	C33H5.1	protein_coding	protein_coding	WBGene00016370	0.3511	974			GO:0016020; GO:0016021	FALSE	4.02269	0.306286		IV	7808912	7810681	1770	+	0	0	10.4068	0	0	0	0	0	0.634318	0	0	0
WBGene00016371	C33H5.2.1	C33H5.2	protein_coding	protein_coding	WBGene00016371	0.3551	1549		GO:0016740; GO:0016757	GO:0016020; GO:0016021	FALSE	4.02269	0.306286		IV	7805040	7807948	2909	+	0	0	10.4068	0	0	0	0	0	0.398854	0	0	0
WBGene00017562	F18C5.9.1	F18C5.9	protein_coding	protein_coding	WBGene00017562	0.4143	420				FALSE	4.02269	0.306286		II	6567134	6567870	737	+	0	0	10.4068	0	0	0	0	0	1.47101	0	0	0
WBGene00011576	T07C12.12.1	rmh-2	protein_coding	protein_coding	WBGene00011576	0.3633	2023	GO:0000712; GO:0000724	GO:0000166	GO:0016604; GO:0031422	TRUE	4.01881	7.3586e-21	1.09998e-19	V	9927782	9930775	2994	-	779.114	818.856	721.537	63.9846	21.0861	57.0379	21.0441	20.1662	21.1744	0.989109	0.324283	0.976323	5
WBGene00003159	F32D1.10.1	mcm-7	protein_coding	protein_coding	WBGene00003159	0.4704	2449	GO:0000070; GO:0000727; GO:0006260; GO:0006268; GO:0006270; GO:0006271; GO:0007049; GO:0009792; GO:0032508; GO:0072689	GO:0000166; GO:0003677; GO:0003678; GO:0003697; GO:0004386; GO:0005524; GO:0016787; GO:0016887; GO:0017116	GO:0005634; GO:0042555	TRUE	4.01759	8.21496e-37	3.50669e-35	V	4347166	4349768	2603	+	3437.46	3633.71	2894.82	255.938	134.424	223.847	76.6964	73.9223	70.1749	3.26822	1.7077	3.1651	5
WBGene00021012	W03G1.6a.1; W03G1.6b.1; W03G1.6c.1; W03G1.6d.1; W03G1.6e.1; W03G1.6f.1; W03G1.6g.1; W03G1.6h.1	pig-1	protein_coding	protein_coding	WBGene00021012	0.4602	1914	GO:0006468; GO:0006915; GO:0007399; GO:0014019; GO:0016310; GO:0018108; GO:0030155; GO:0031581; GO:0035556; GO:0043065; GO:0055059; GO:1904746	GO:0000166; GO:0004672; GO:0004674; GO:0004712; GO:0004715; GO:0005524; GO:0016301; GO:0016740; GO:0106310	GO:0005737; GO:0005813; GO:0005815; GO:0005856	TRUE	4.01545	4.53086e-32	1.34297e-30	IV	506737	519457	12721	-	755.989	889.21	770.102	63.9846	31.6292	52.7332	21.5824	23.146	23.8867	1.04544	0.514125	0.954042	5
WBGene00007259	C02B4.3.1	C02B4.3	protein_coding	protein_coding	WBGene00007259	0.4135	561				FALSE	4.00976	0.169911		X	12658476	12661062	2587	-	1.10122	3.90862	5.20339	0	0	0	0.10726	0.347115	0.550646	0	0	0
WBGene00018433	F45C12.2.1	ceh-82	protein_coding	protein_coding	WBGene00018433	0.4746	828		GO:0003677		FALSE	4.00824	0.308058		II	1732276	1733291	1016	+	6.60733	0	3.46893	0	0	0	0.436035	0	0.248722	0	0	0
WBGene00016619	C43H6.6.1	C43H6.6	protein_coding	protein_coding	WBGene00016619	0.4045	1718	GO:0050728		GO:0005615; GO:0016020; GO:0016021	TRUE	4.00585	0.0466575	0.0754473	X	2395505	2398826	3322	+	7.70855	0.651436	62.4407	0	0	4.30475	0.245174	0.0188913	2.15771	0	0	0.0867661
WBGene00013801	Y116A8C.24a.1; Y116A8C.24b.1	Y116A8C.24	protein_coding	protein_coding	WBGene00013801	0.4091	1648	GO:0006468; GO:0007169; GO:0016310; GO:0018108; GO:0030154; GO:0045087	GO:0000166; GO:0004672; GO:0004712; GO:0004713; GO:0004715; GO:0005102; GO:0005524; GO:0016301; GO:0016740	GO:0031234	FALSE	4.00585	0.0613605		IV	17068795	17070903	2109	-	1.65183	11.0744	6.39046	1.03201	0	0	0.0547689	0.334794	0.23021	0.0195835	0	0
WBGene00000868	T06E6.2a.1; T06E6.2a.2; T06E6.2b.1	cyb-3	protein_coding	protein_coding	WBGene00000868	0.4674	1452	GO:0000070; GO:0000079; GO:0000278; GO:0001556; GO:0001934; GO:0007049; GO:0007098; GO:0010389; GO:0035046; GO:0044772; GO:0045144; GO:0045842; GO:0051301; GO:0051321; GO:0051383; GO:0051445	GO:0016538; GO:0019901	GO:0000307; GO:0005634; GO:0005737; GO:0005813	TRUE	4.00287	6.63526e-23	1.17774e-21	V	15395696	15397348	1653	+	1195.38	2240.94	1005.99	109.393	73.8013	93.6283	44.9846	76.8914	41.1316	2.35607	1.58132	2.23288	5
WBGene00004181	W02D9.1a.1; W02D9.1a.2; W02D9.1b.1; W02D9.1b.2	pri-2	protein_coding	protein_coding	WBGene00004181	0.4608	1535	GO:0006260; GO:0006269; GO:0110039	GO:0003677; GO:0046872; GO:0051536; GO:0051539	GO:0005658; GO:1990077	TRUE	3.99963	2.82886e-21	4.3687e-20	I	12528312	12532182	3871	-	4318.44	4623.24	3824.49	414.868	135.742	246.447	153.725	150.056	147.916	8.45214	2.75124	5.55956	5
WBGene00016449	C35D10.13.1	tost-1	protein_coding	protein_coding	WBGene00016449	0.3897	621	GO:0007049; GO:0007059; GO:0051301; GO:0051781; GO:0051984	GO:0005515	GO:0005634; GO:0005737; GO:0048471	TRUE	3.98472	3.73364e-12	2.9108e-11	III	4877526	4878311	786	-	167.936	205.202	157.836	18.5762	10.5431	4.30475	14.7767	16.4628	15.0891	0.935469	0.528199	0.240039	1
WBGene00004223	F54G8.5.1	ptr-9	protein_coding	protein_coding	WBGene00004223	0.371	2555	GO:0006897; GO:0018996		GO:0005886; GO:0016020; GO:0016021; GO:0030659	TRUE	3.98286	0.000175882	0.000496672	III	9157243	9161653	4411	-	31.3848	29.3146	26.017	2.06402	0	3.22856	0.671203	0.57162	0.604526	0.0252631	0	0.0437566
WBGene00002119	Y53H1A.4a.1; Y53H1A.4b.1; Y53H1A.4c	ins-36	protein_coding	protein_coding	WBGene00002119	0.3908	249				TRUE	3.98255	0.000282999	0.000768032	I	11212426	11215091	2666	-	34.1379	32.5718	19.0791	3.09603	0	2.15238	7.49139	6.51713	4.54892	0.388839	0	0.299326
WBGene00021446	Y39A3CR.6.1	hlh-33	protein_coding	protein_coding	WBGene00021446	0.4519	1248		GO:0046983		TRUE	3.97793	3.14618e-22	5.28783e-21	III	1855392	1859592	4201	+	1537.31	1050.77	1023.33	53.6645	57.9868	117.304	67.3087	41.9474	48.6802	1.34474	1.44557	3.25481	5
WBGene00005757	ZC482.6.1	srw-10	protein_coding	protein_coding	WBGene00005757	0.3714	1131	GO:0007186	GO:0008528	GO:0005886; GO:0016020; GO:0016021	FALSE	3.9767	0.311948		III	12755348	12756613	1266	+	0	9.77155	0	0	0	0	0	0.430442	0	0	0	0
WBGene00009043	F22B5.5.1	F22B5.5	protein_coding	protein_coding	WBGene00009043	0.397	1053				FALSE	3.9767	0.311948		II	8453254	8454613	1360	-	0	9.77155	0	0	0	0	0	0.462326	0	0	0	0
WBGene00021779	Y51H7C.1.1	Y51H7C.1	protein_coding	protein_coding	WBGene00021779	0.518	1417				FALSE	3.9767	0.311948		II	1467727	1469604	1878	+	0	9.77155	0	0	0	0	0	0.343563	0	0	0	0
WBGene00194957	Y116A8C.465.1	Y116A8C.465	protein_coding	protein_coding	WBGene00194957	0.5281	267				FALSE	3.9767	0.311948		IV	17065382	17065761	380	+	0	9.77155	0	0	0	0	0	1.82333	0	0	0	0
WBGene00015374	C03B1.3.1	C03B1.3	protein_coding	protein_coding	WBGene00015374	0.4143	350				TRUE	3.96874	0.00721483	0.0143692	X	6366013	6366831	819	+	7.70855	10.423	38.1582	1.03201	2.63576	0	1.20346	1.48367	6.47246	0.0922105	0.234294	0
WBGene00000797	AH9.2.1	crn-4	protein_coding	protein_coding	WBGene00000797	0.432	1162	GO:0000467; GO:0000737; GO:0000738; GO:0006309; GO:0006401; GO:0006915	GO:0000175; GO:0003676; GO:0003697; GO:0004518; GO:0004520; GO:0004536; GO:0004540; GO:0008408; GO:0016787	GO:0005737	TRUE	3.96874	6.60263e-06	2.39293e-05	X	2255852	2258101	2250	-	52.308	102.927	64.1752	8.25607	0	5.38094	2.45973	4.41303	3.27876	0.222194	0	0.160353
WBGene00007447	C08F8.5.1	fbxb-9	protein_coding	protein_coding	WBGene00007447	0.3441	715				FALSE	3.96515	0.179063		IV	11161787	11162551	765	-	2.75305	5.21149	1.73446	0	0	0	0.210394	0.363136	0.144015	0	0	0
WBGene00008799	F14E5.1.1	F14E5.1	protein_coding	protein_coding	WBGene00008799	0.3345	1468	GO:0015749; GO:0055085	GO:0015149; GO:0022857	GO:0016020; GO:0016021	TRUE	3.96134	2.9004e-08	1.4669e-07	II	8417618	8419758	2141	+	7081.96	6249.23	3710.02	59.8565	322.881	711.36	263.604	212.087	150.037	1.27512	6.84289	16.7799
WBGene00015041	B0213.11a.1; B0213.11b.1; B0213.11c.1	cyp-34A6	protein_coding	protein_coding	WBGene00015041	0.3763	1557	GO:0006082; GO:0006805	GO:0004497; GO:0005506; GO:0008395; GO:0016491; GO:0016705; GO:0016712; GO:0020037; GO:0046872	GO:0005737; GO:0043231	TRUE	3.95946	3.18825e-11	2.25371e-10	V	3958160	3961358	3199	-	923.372	595.413	829.073	61.9205	11.8609	76.4093	32.4051	19.0521	31.6121	1.24369	0.237003	1.69935	5
WBGene00000265	K04C2.4.1; K04C2.4.2	brd-1	protein_coding	protein_coding	WBGene00000265	0.4094	2198	GO:0006281; GO:0006974; GO:0016567	GO:0005515; GO:0016740; GO:0046872; GO:0061630	GO:0005634; GO:0005694; GO:0005737; GO:0031436	TRUE	3.95728	6.71889e-18	8.40589e-17	III	6885204	6889523	4320	-	794.531	1280.72	752.757	41.2804	98.8411	43.0475	19.7519	29.0296	20.3318	0.587328	1.39905	0.678181	5
WBGene00003937	K07C11.1.1	pax-1	protein_coding	protein_coding	WBGene00003937	0.4044	774	GO:0006355; GO:0006357; GO:0048856	GO:0000978; GO:0000981; GO:0003677	GO:0005634	FALSE	3.95652	0.304528		V	8224965	8226037	1073	+	4.40489	5.21149	0	0	0	0	0.310971	0.335455	0	0	0	0
WBGene00007060	T26A5.1.1	wht-6	protein_coding	protein_coding	WBGene00007060	0.3921	1933	GO:0055085	GO:0000166; GO:0005524; GO:0140359	GO:0005886; GO:0016020; GO:0016021	FALSE	3.95106	0.315135		III	6471720	6475246	3527	+	0	4.56006	5.20339	0	0	0	0	0.117531	0.15981	0	0	0
WBGene00014145	ZK899.7.1	ZK899.7	protein_coding	protein_coding	WBGene00014145	0.3944	573				FALSE	3.95039	0.024974		X	9447861	9449399	1539	-	5.50611	14.3316	13.8757	2.06402	0	0	0.525068	1.2461	1.43764	0.112648	0	0
WBGene00018805	F54D10.4.1; F54D10.4.2	F54D10.4	protein_coding	protein_coding	WBGene00018805	0.4077	1002				TRUE	3.94991	0.05506	0.0871058	II	3805493	3807053	1561	-	6.05672	9.12011	3.46893	0	1.31788	0	0.33029	0.453467	0.205531	0	0.0409196	0
WBGene00008107	C45G3.1.1	aspm-1	protein_coding	protein_coding	WBGene00008107	0.4133	3741	GO:0000212; GO:0000278; GO:0007051; GO:0032880; GO:0051295; GO:0051296	GO:0005516; GO:0019904	GO:0000922; GO:0005819; GO:0051233	TRUE	3.94621	9.00415e-32	2.64304e-30	I	9221834	9226390	4557	-	823.714	958.263	679.91	63.9846	36.9007	58.1141	12.0313	12.7618	10.7898	0.534875	0.306881	0.537922	5
WBGene00013416	Y64G10A.7a.1; Y64G10A.7b.1; Y64G10A.7c.1; Y64G10A.7d.1; Y64G10A.7e.1	Y64G10A.7	protein_coding	protein_coding	WBGene00013416	0.4417	5237	GO:0040017	GO:0005509		TRUE	3.93441	2.13326e-18	2.75709e-17	IV	14291901	14319564	27664	+	2925.4	2273.51	2880.94	85.6567	284.663	159.276	30.523	21.6286	32.6589	0.511498	1.69111	1.05316	5
WBGene00001123	C43C3.3.1	dyf-7	protein_coding	protein_coding	WBGene00001123	0.3862	1846	GO:0003391; GO:0007399; GO:1990138	GO:0043621	GO:0005576; GO:0005886; GO:0016020; GO:0016021; GO:0030425; GO:0032590; GO:0042995	TRUE	3.93411	8.58088e-15	8.52672e-14	X	9698678	9701679	3002	+	177.847	245.592	322.61	21.6722	18.4503	8.6095	5.26431	6.62819	10.3752	0.367144	0.310954	0.1615	5
WBGene00009731	F45G2.3.1	exo-1	protein_coding	protein_coding	WBGene00009731	0.4016	2251	GO:0006281; GO:0006298; GO:0006310; GO:0006974; GO:0090305	GO:0003677; GO:0003824; GO:0004518; GO:0004519; GO:0004527; GO:0016787; GO:0017108; GO:0035312; GO:0046872	GO:0005634	TRUE	3.92812	2.0191e-15	2.08143e-14	III	13423514	13426204	2691	+	1546.67	1899.59	1276.57	168.217	42.1722	99.0092	37.5445	42.0434	33.668	2.33701	0.582873	1.52309	5
WBGene00009362	F33E2.6.1	F33E2.6	protein_coding	protein_coding	WBGene00009362	0.4565	2747				FALSE	3.92659	0.311895		I	12587242	12591091	3850	+	5.50611	3.90862	0	0	0	0	0.109525	0.0708889	0	0	0	0
WBGene00012673	Y39B6A.11.1	dyf-17	protein_coding	protein_coding	WBGene00012673	0.5259	1101			GO:0035869	FALSE	3.92072	0.0970694		V	19127530	19130938	3409	+	2.75305	0.651436	15.6102	1.03201	0	0	0.136632	0.029478	0.841724	0.029313	0	0
WBGene00005210	T02B11.1.1	srg-53	protein_coding	protein_coding	WBGene00005210	0.3514	888	GO:0007606	GO:0004888	GO:0016020; GO:0016021	FALSE	3.91972	0.31906		V	879793	881574	1782	+	9.36038	0	0	0	0	0	0.575978	0	0	0	0	0
WBGene00007777	C27D8.1.1	C27D8.1	protein_coding	protein_coding	WBGene00007777	0.4543	1127	GO:0006468; GO:0007165; GO:0016310; GO:0018105	GO:0000166; GO:0004672; GO:0004674; GO:0005524; GO:0016301	GO:0005634; GO:0005737	FALSE	3.91972	0.31906		IV	12717831	12719391	1561	+	9.36038	0	0	0	0	0	0.453832	0	0	0	0	0
WBGene00008246	C50H2.13.1	C50H2.13	protein_coding	protein_coding	WBGene00008246	0.3938	673			GO:0016020; GO:0016021	FALSE	3.91133	0.316556		V	9926544	9927884	1341	+	6.05672	3.25718	0	0	0	0	0.491754	0.241124	0	0	0	0
WBGene00219234	B0511.17.1	B0511.17	protein_coding	protein_coding	WBGene00219234	0.3664	262	GO:0009790			FALSE	3.90967	0.204542		I	10643029	10643724	696	+	1.10122	6.51436	1.73446	0	0	0	0.229667	1.23875	0.393019	0	0	0
WBGene00009075	F23B2.7a.1; F23B2.7b.1	F23B2.7	protein_coding	protein_coding	WBGene00009075	0.4476	839			GO:0016020; GO:0016021	FALSE	3.90854	0.320468		IV	9150491	9152043	1553	+	0	2.60575	6.93786	0	0	0	0	0.154733	0.490922	0	0	0
WBGene00009509	F37D6.3.1	F37D6.3	protein_coding	protein_coding	WBGene00009509	0.4706	510		GO:0003723		FALSE	3.90854	0.320468		I	10486714	10487322	609	+	0	2.60575	6.93786	0	0	0	0	0.254551	0.807615	0	0	0
WBGene00003219	F54F7.5.1	mes-1	protein_coding	protein_coding	WBGene00003219	0.4146	3403	GO:0001708; GO:0003006; GO:0006468; GO:0007049; GO:0007163; GO:0007276; GO:0008356; GO:0018108; GO:0040001; GO:0045167; GO:0048557; GO:0051301; GO:0070986	GO:0000166; GO:0004672; GO:0004713; GO:0005524	GO:0005886; GO:0016020; GO:0016021	TRUE	3.90646	6.89585e-13	5.7535e-12	X	11857478	11862373	4896	+	246.674	778.467	442.288	28.8962	22.404	46.276	3.96083	11.397	7.71601	0.265549	0.204827	0.47089	5
WBGene00017632	F20B6.9.1	F20B6.9	protein_coding	protein_coding	WBGene00017632	0.4444	360				FALSE	3.90592	0.059716		X	4204602	4206444	1843	-	5.50611	9.12011	3.46893	0	1.31788	0	0.835733	1.26215	0.572061	0	0.113893	0
WBGene00010662	K08E3.2.1	K08E3.2	protein_coding	protein_coding	WBGene00010662	0.4452	831			GO:0005856	FALSE	3.90061	0.180902		III	13747472	13748686	1215	-	3.30366	2.60575	3.46893	0	0	0	0.21723	0.156223	0.247824	0	0	0
WBGene00003892	Y75B8A.12.1	osm-12	protein_coding	protein_coding	WBGene00003892	0.4178	2166	GO:0006935; GO:0008104; GO:0015031; GO:0030030; GO:0042073; GO:0046907; GO:0060271; GO:1904107; GO:1905515		GO:0005737; GO:0005856; GO:0005929; GO:0005930; GO:0016020; GO:0034464; GO:0036064; GO:0042995; GO:0043005; GO:0097730	TRUE	3.88846	0.000847832	0.00208289	III	12191056	12202450	11395	-	97.4581	80.1267	482.181	0	32.947	11.8381	2.45858	1.84303	13.216	0	0.47324	0.189255
WBGene00010585	K05C4.9.1	K05C4.9	protein_coding	protein_coding	WBGene00010585	0.3597	2249				TRUE	3.88761	3.40709e-17	4.05739e-16	I	14726804	14730719	3916	-	437.185	1093.76	496.057	41.2804	47.4437	48.4284	10.6219	24.2296	13.0946	0.574009	0.656315	0.745652	5
WBGene00021605	Y46H3C.5.1; Y46H3C.5.2	Y46H3C.5	protein_coding	protein_coding	WBGene00021605	0.4922	651				TRUE	3.88229	0.00159048	0.00368105	V	1691029	1692052	1024	-	118.932	14.983	12.1412	6.19205	2.63576	1.07619	9.98258	1.14665	1.10721	0.297453	0.125965	0.0572443
WBGene00021362	Y37E11AL.6a.1; Y37E11AL.6b.1; Y37E11AL.6c.1	fmil-1	protein_coding	protein_coding	WBGene00021362	0.4904	3279	GO:0007155	GO:0005509	GO:0005887; GO:0016020; GO:0016021	TRUE	3.88168	5.54431e-10	3.43277e-09	IV	3658877	3668703	9827	-	1493.81	482.715	667.769	20.6402	88.2981	71.0284	24.8931	7.33437	12.0902	0.196851	0.837786	0.750094	1
WBGene00001688	F22B7.13.1	gpr-1	protein_coding	protein_coding	WBGene00001688	0.4299	1698	GO:0007049; GO:0050790; GO:0051301	GO:0001965; GO:0005092; GO:0005515; GO:0030695	GO:0005737; GO:0005818; GO:0005819; GO:0005856; GO:0005938	TRUE	3.88118	1.25039e-08	6.59923e-08	III	8628926	8630776	1851	+	460.317	370.334	231.048	31.3338	3.95364	36.8276	14.8131	10.866	8.07818	0.577085	0.0724408	0.751036
WBGene00189987	C18H7.12.1	C18H7.12	protein_coding	protein_coding	WBGene00189987	0.3968	1570			GO:0016020; GO:0016021	FALSE	3.87808	0.324325		IV	583813	587829	4017	-	0	9.12011	0	0	0	0	0	0.28941	0	0	0	0
WBGene00001914	K03A1.1.1	his-40	protein_coding	protein_coding	WBGene00001914	0.4941	589		GO:0003677; GO:0046982	GO:0000786	TRUE	3.87585	4.79587e-11	3.31851e-10	X	7310110	7310698	589	+	303.432	511.086	200.166	9.84687	37.1297	23.0149	28.1496	43.2307	20.1755	0.522815	1.96124	1.35307	1
WBGene00001937	F22B3.2.1	his-63	protein_coding	protein_coding	WBGene00001937	0.5161	529		GO:0003677; GO:0046982	GO:0000786	TRUE	3.87565	3.07317e-10	1.94956e-09	IV	11406365	11406893	529	-	141.78	295.951	95.9504	12.7706	14.4125	9.49498	14.6448	27.8727	10.7681	0.754954	0.84763	0.621533	1
WBGene00050880	F32H2.12.1	F32H2.12	protein_coding	protein_coding	WBGene00050880	0.3688	762				FALSE	3.87389	0.208982		I	8973066	8974575	1510	-	6.05672	1.30287	1.73446	0	0	0	0.434318	0.0851845	0.135132	0	0	0
WBGene00022503	ZC13.2.1	ZC13.2	protein_coding	protein_coding	WBGene00022503	0.3643	1507			GO:0016020; GO:0016021	TRUE	3.86823	8.90736e-05	0.000265643	X	880629	883049	2421	+	19.822	37.7833	78.0509	1.03201	3.95364	4.30475	0.71872	1.24911	3.07478	0.0214158	0.0816221	0.0989145
WBGene00001118	ZK520.3a.1; ZK520.3b.1; ZK520.3b.2	dyf-2	protein_coding	protein_coding	WBGene00001118	0.4467	2680	GO:0006935; GO:0007635; GO:0008104; GO:0015031; GO:0030030; GO:0035721; GO:0042048; GO:0042073; GO:0060271; GO:1905515		GO:0005929; GO:0030991; GO:0030992; GO:0042995; GO:0097730	TRUE	3.86815	1.18152e-05	4.11359e-05	III	13674917	13686445	11529	-	107.369	153.739	492.587	7.22406	5.27153	38.7427	2.18913	2.858	10.9118	0.0842969	0.0611962	0.500589
WBGene00019317	K02E10.1.1	K02E10.1	protein_coding	protein_coding	WBGene00019317	0.399	1248	GO:0006904; GO:0009306; GO:0017157; GO:0032869; GO:0072659	GO:0003924; GO:0005525	GO:0005768; GO:0005794; GO:0005886; GO:0008021; GO:0032593; GO:0055037	TRUE	3.86762	5.56031e-18	7.00704e-17	X	2496180	2501001	4822	+	2500.87	3575.73	2088.29	191.954	92.2517	274.428	109.497	142.746	99.3405	4.81002	2.29976	7.61446	5
WBGene00015636	C09D4.6.1	C09D4.6	protein_coding	protein_coding	WBGene00015636	0.3569	664			GO:0016020; GO:0016021	TRUE	3.86206	0.000116529	0.000340322	I	5486487	5487150	664	-	25.3281	33.2233	24.2825	1.03201	2.63576	2.15237	2.0843	2.4928	2.17107	0.0486049	0.123498	0.112247
WBGene00005011	F26F4.8.1	F26F4.8	protein_coding	protein_coding	WBGene00005011	0.4009	1130				TRUE	3.85563	5.75595e-54	8.02062e-52	III	4903997	4905473	1477	-	1111.13	1259.23	1174.23	72.2406	94.8875	78.5617	53.7295	55.5187	61.6914	1.99925	2.61248	2.40745	5
WBGene00019404	K05B2.4.1	K05B2.4	protein_coding	protein_coding	WBGene00019404	0.4146	1341	GO:0006629; GO:0006631; GO:0006637	GO:0016790; GO:0047617	GO:0005737	TRUE	3.84814	0.000283624	0.000769383	X	4919019	4920988	1970	-	118.932	108.138	291.39	0	7.90729	27.9809	4.84613	4.01758	12.9002	0	0.183452	0.722533
WBGene00022628	ZC513.3.1	ZC513.3	protein_coding	protein_coding	WBGene00022628	0.4027	1860			GO:0016020; GO:0016021	TRUE	3.84557	0.147122	0.203882	V	8047044	8049528	2485	+	8.80977	8.46867	0	0	0	1.07619	0.258808	0.226838	0	0	0	0.0200355
WBGene00022429	Y108F1.1.1	Y108F1.1	protein_coding	protein_coding	WBGene00022429	0.4826	717				FALSE	3.84492	0.328558		X	274498	277897	3400	+	2.47153	0	6.31033	0	0	0	0.188353	0	0.522495	0	0	0
WBGene00017722	F22F7.4a.1; F22F7.4b; F22F7.4c.1	F22F7.4	protein_coding	protein_coding	WBGene00017722	0.4285	1456		GO:0016740; GO:0016757	GO:0016020; GO:0016021	TRUE	3.84456	0.0656766	0.101595	V	2103658	2106076	2419	-	6.05672	7.81724	3.46893	1.03201	0	0	0.227301	0.267489	0.141444	0.022166	0	0
WBGene00016178	C28C12.2.1	mesp-1	protein_coding	protein_coding	WBGene00016178	0.5083	720				FALSE	3.84135	0.171034		IV	8499310	8500076	767	+	1.65183	15.6345	0	0	0	1.07619	0.12536	1.08184	0	0	0	0.0517584
WBGene00008242	C50H2.6.1	ceh-75	protein_coding	protein_coding	WBGene00008242	0.3608	715		GO:0003677	GO:0005634	FALSE	3.83902	0.0632879		V	9921337	9922194	858	+	4.40489	7.81724	5.20339	1.03201	0	0	0.336631	0.544704	0.432046	0.045138	0	0
WBGene00004287	K03D3.10.1	rac-2	protein_coding	protein_coding	WBGene00004287	0.4694	588	GO:0001764; GO:0007015; GO:0007163; GO:0008045; GO:0008360; GO:0030865; GO:0032956; GO:0033563; GO:0043652; GO:0048812; GO:0048846	GO:0000166; GO:0003924; GO:0005515; GO:0005525; GO:0019901	GO:0005856; GO:0005886; GO:0005938; GO:0016020; GO:0030424; GO:0031410; GO:0042995; GO:0043005	TRUE	3.83653	0.0660284	0.102061	IV	16308225	16309829	1605	+	6.60733	7.1658	3.46893	0	0	1.07619	0.614008	0.607157	0.350241	0	0	0.0633776
WBGene00019129	F59G1.8a.1; F59G1.8b.1	F59G1.8	protein_coding	protein_coding	WBGene00019129	0.3974	833				TRUE	3.83206	0.00755732	0.0149702	II	5906545	5907613	1069	+	20.3726	38.4348	19.0791	0	0	5.38094	1.33637	2.29875	1.35976	0	0	0.223686
WBGene00021470	Y39G10AR.12a.1; Y39G10AR.12b.1	tpxl-1	protein_coding	protein_coding	WBGene00021470	0.4978	1786	GO:0030953; GO:0090307	GO:0005515; GO:0019901; GO:0044877	GO:0000235; GO:0005813; GO:0005874; GO:0031616; GO:0072687	TRUE	3.83069	7.12661e-25	1.40026e-23	I	2297280	2304393	7114	-	3134.07	3988.09	3068.27	306.507	133.106	275.504	95.8856	111.249	101.991	5.3669	2.31867	5.3416	5
WBGene00017411	F13A2.2.1	F13A2.2	protein_coding	protein_coding	WBGene00017411	0.3775	898				FALSE	3.82406	0.33124		V	4382916	4385242	2327	-	5.50611	3.25718	0	0	0	0	0.335038	0.180709	0	0	0	0
WBGene00022465	Y110A7A.20.1	ift-20	protein_coding	protein_coding	WBGene00022465	0.4123	405	GO:0042073; GO:0051642; GO:0061512		GO:0005794; GO:0005813; GO:0005929; GO:0030425; GO:0030992; GO:0042995; GO:0043025; GO:0097730	TRUE	3.81321	0.000142978	0.000410547	I	5100751	5101674	924	+	32.486	62.5379	145.695	1.03201	13.1788	3.22856	4.38296	7.69311	21.3569	0.0796881	1.01238	0.276045
WBGene00010893	M28.1.1	cutl-9	protein_coding	protein_coding	WBGene00010893	0.396	1813			GO:0016020; GO:0016021	TRUE	3.80578	9.60237e-08	4.57585e-07	II	10622265	10625943	3679	+	748.28	831.884	1956.48	19.6082	166.053	67.7998	22.5524	22.8601	64.0657	0.338224	2.84952	1.29496
WBGene00003507	C14C11.6.1	mut-14	protein_coding	protein_coding	WBGene00003507	0.4193	1748	GO:0007276; GO:0030154; GO:0035194	GO:0000166; GO:0003676; GO:0003723; GO:0003724; GO:0004386; GO:0005524; GO:0016787	GO:0005634; GO:0043186; GO:1990633	TRUE	3.80163	3.0719e-07	1.37116e-06	V	5658713	5660704	1992	-	419.565	186.962	388.52	20.6402	3.95364	46.276	13.1155	5.32876	13.1954	0.369264	0.0703687	0.916728
WBGene00011513	T06C12.4.1	fbxa-197	protein_coding	protein_coding	WBGene00011513	0.3674	1244				FALSE	3.80145	0.198923		V	15867683	15869051	1369	+	0.550611	16.2859	0	0	0	1.07619	0.0241852	0.652237	0	0	0	0.0299566
WBGene00017696	F22B7.6a.1; F22B7.6b.1	polk-1	protein_coding	protein_coding	WBGene00017696	0.3854	1955	GO:0000003; GO:0006260; GO:0006281; GO:0006974; GO:0009792; GO:0019985; GO:0042276; GO:0071897	GO:0003684; GO:0003887; GO:0016740; GO:0016779; GO:0046872	GO:0005634	TRUE	3.80094	1.32569e-22	2.30248e-21	III	8626291	8628571	2281	-	962.465	1525.01	1254.02	106.297	51.3974	109.771	26.9007	38.8634	38.0808	1.70035	0.817933	1.94432	5
WBGene00255600	F54H5.14.1	F54H5.14	protein_coding	protein_coding	WBGene00255600	0.364	1335		GO:0008289		FALSE	3.80028	0.138111		II	6623423	6625389	1967	-	2.20244	28.0118	0	0	0	2.15237	0.0901465	1.04538	0	0	0	0.0558293
WBGene00010318	F59B10.2.1	F59B10.2	protein_coding	protein_coding	WBGene00010318	0.4079	1662				TRUE	3.80011	0.000610028	0.00154682	II	10507269	10509932	2664	-	36.3403	24.1031	135.288	7.22406	0	6.45712	1.19477	0.722531	4.83257	0.13593	0	0.134534
WBGene00001889	ZK131.9.1	his-15	protein_coding	protein_coding	WBGene00001889	0.5149	369	GO:0045087	GO:0003677; GO:0046982	GO:0000786	FALSE	3.79663	0.261485		II	13818371	13818739	369	+	0	0	29.6125	1.61144	0	0	0	0	4.76429	0.136569	0	0
WBGene00001918	F08G2.1.1	his-44	protein_coding	protein_coding	WBGene00001918	0.5149	369	GO:0045087	GO:0003677; GO:0046982	GO:0000786	FALSE	3.79663	0.261485		II	13826730	13827098	369	-	0	0	29.6125	1.61144	0	0	0	0	4.76429	0.136569	0	0
WBGene00001830	T06E4.1.1; T06E4.1.2	hcp-2	protein_coding	protein_coding	WBGene00001830	0.4237	4127	GO:0000212; GO:0008104; GO:0051257; GO:0051306; GO:0051307; GO:0051316	GO:0005515	GO:0000776	TRUE	3.79348	1.06322e-15	1.11984e-14	V	9645746	9650297	4552	+	1052.22	1513.94	945.283	113.521	35.5828	103.314	13.9315	18.2763	13.598	0.860214	0.268243	0.866862	5
WBGene00004176	ZK488.10.1	pqn-97	protein_coding	protein_coding	WBGene00004176	0.3951	529			GO:0016020; GO:0016021	FALSE	3.79071	0.193384		V	609144	609726	583	-	1.65183	0	15.6102	0	0	1.07619	0.170622	0	1.75187	0	0	0.0704462
WBGene00001666	T07A9.7.1	gpa-4	protein_coding	protein_coding	WBGene00001666	0.3703	1982	GO:0007165; GO:0007186; GO:0007188	GO:0000166; GO:0001664; GO:0003924; GO:0005525; GO:0019001; GO:0031683; GO:0046872	GO:0005834; GO:0005929; GO:0097730	TRUE	3.79017	4.58643e-17	5.42452e-16	IV	401695	405346	3652	+	232.358	248.197	222.011	14.4481	26.3576	10.7619	6.40588	6.23888	6.64999	0.227967	0.413738	0.188022	1
WBGene00012275	W05B5.2.1	npr-14	protein_coding	protein_coding	WBGene00012275	0.4383	1864	GO:0007165; GO:0007186; GO:0007218	GO:0004930; GO:0004983; GO:0008528	GO:0005887; GO:0016020; GO:0016021	FALSE	3.78712	0.336023		I	13050445	13057435	6991	+	0	4.89824	3.21252	0	0	0	0	0.130921	0.102317	0	0	0
WBGene00011915	T22C1.4.1	ctf-8	protein_coding	protein_coding	WBGene00011915	0.3963	487	GO:0007064	GO:0003674	GO:0031390	TRUE	3.7813	4.48363e-25	8.93998e-24	I	7940134	7940790	657	-	1005.04	1078.3	672.637	88.4768	49.0174	62.468	112.766	110.312	81.9976	5.68153	3.13144	4.44175	5
WBGene00011689	T10C6.7.1	T10C6.7	protein_coding	protein_coding	WBGene00011689	0.4203	2201	GO:0009790			TRUE	3.78011	1.07456e-11	7.98217e-11	V	16027449	16031713	4265	-	167.936	120.516	109.271	14.4481	7.90729	6.45712	4.16917	2.72796	2.94737	0.205285	0.111771	0.101589	1
WBGene00018900	F55G1.4.1; F55G1.4.2	rod-1	protein_coding	protein_coding	WBGene00018900	0.405	6362	GO:0000070; GO:0007049; GO:0007059; GO:0007079; GO:0007094; GO:0010696; GO:0051301; GO:0090268; GO:1901970; GO:1902423; GO:1903394; GO:1905342; GO:1905561	GO:0005515; GO:0019904; GO:0031267	GO:0000775; GO:0000776; GO:0005694; GO:0005737; GO:0005819; GO:0005828; GO:0005856; GO:1990423	TRUE	3.77916	3.61524e-45	2.53338e-43	IV	7478171	7485523	7353	+	1798.84	1979.07	1656.41	101.137	143.649	151.742	15.4499	15.4982	15.457	0.497142	0.702475	0.825919	5
WBGene00021987	Y59E1A.1.1	fbxa-40	protein_coding	protein_coding	WBGene00021987	0.3908	1428				FALSE	3.77506	0.337594		X	1937947	1942199	4253	-	7.15794	1.30287	0	0	0	0	0.273896	0.0454556	0	0	0	0
WBGene00001919	B0035.10.1	his-45	protein_coding	protein_coding	WBGene00001919	0.5094	534		GO:0003677; GO:0046982	GO:0000786	TRUE	3.77476	7.45685e-18	9.27173e-17	IV	11326557	11327090	534	+	285.09	292.048	482.994	20.2925	35.667	21.6096	29.172	27.2475	53.697	1.18839	2.07801	1.4013	5
WBGene00009420	F35E8.6.1	F35E8.6	protein_coding	protein_coding	WBGene00009420	0.4908	819				FALSE	3.77221	0.337966		V	15912148	15913056	909	+	0	8.46867	0	0	0	0	0	0.515163	0	0	0	0
WBGene00044003	Y41E3.18.1	Y41E3.18	protein_coding	protein_coding	WBGene00044003	0.3931	1478	GO:0002084	GO:0008474; GO:0016787	GO:0005886; GO:0010008	FALSE	3.77221	0.337966		IV	15061929	15065748	3820	-	0	8.46867	0	0	0	0	0	0.285466	0	0	0	0
WBGene00009990	F53F4.7.1	F53F4.7	protein_coding	protein_coding	WBGene00009990	0.3516	1095				TRUE	3.77205	0.00605492	0.0122626	V	13612439	13613979	1541	-	12.664	10.423	39.8927	0	1.31788	3.22856	0.631952	0.474233	2.16286	0	0.0374443	0.102099
WBGene00006060	ZC513.12.1	sth-1	protein_coding	protein_coding	WBGene00006060	0.3881	402			GO:0005886	FALSE	3.77011	0.216581		V	8052137	8053730	1594	+	0	52.7664	0	0	3.95364	0	0	6.5395	0	0	0.305981	0
WBGene00020010	R11G1.1.1	R11G1.1	protein_coding	protein_coding	WBGene00020010	0.441	5048	GO:0006898	GO:0042562	GO:0005886; GO:0016324; GO:0043235	TRUE	3.76908	0.00470464	0.00977787	X	3659492	3666879	7388	+	13.2147	101.624	32.9548	1.03201	0	9.68568	0.143042	1.00298	0.387569	0.00639336	0	0.0664411
WBGene00015268	BE0003N10.3a.1; BE0003N10.3b.1	BE0003N10.3	protein_coding	protein_coding	WBGene00015268	0.4778	2378		GO:0008270; GO:0046872		TRUE	3.7624	1.08518e-28	2.71251e-27	III	1045809	1053246	7438	-	3207.86	2293.06	2634.66	217.754	127.835	252.904	73.7104	48.0415	65.7751	2.86364	1.67247	3.68273	5
WBGene00020368	T08H4.3.1	ast-1	protein_coding	protein_coding	WBGene00020368	0.4471	1418	GO:0006355; GO:0006357; GO:0030154; GO:0045944; GO:0048664; GO:0071542; GO:0110037	GO:0000981; GO:0003677; GO:0003700; GO:0043565	GO:0005634	TRUE	3.76184	2.99243e-08	1.51155e-07	II	4127848	4134867	7020	-	593.558	801.918	2547.93	43.3444	171.325	76.4093	22.8725	28.1752	106.674	0.95592	3.75895	1.86593
WBGene00019248	H27M09.5.1	H27M09.5	protein_coding	protein_coding	WBGene00019248	0.3691	1119			GO:0016020; GO:0016021	FALSE	3.7556	0.0477379		I	6845175	6846952	1778	-	3.85428	23.4517	1.73446	1.03201	0	1.07619	0.188208	1.04414	0.0920205	0.0288415	0	0.033303
WBGene00008518	F02C12.4.1	irld-2	protein_coding	protein_coding	WBGene00008518	0.4407	987				FALSE	3.75348	0.340418		X	13391949	13395149	3201	-	0	0	8.67232	0	0	0	0	0	0.521636	0	0	0
WBGene00008822	F14H3.3.1; F14H3.3.2	F14H3.3	protein_coding	protein_coding	WBGene00008822	0.3762	1040				FALSE	3.75348	0.340418		V	16051923	16053510	1588	-	0	0	8.67232	0	0	0	0	0	0.495052	0	0	0
WBGene00011847	T19H5.2.1	chil-26	protein_coding	protein_coding	WBGene00011847	0.3408	1118	GO:0005975	GO:0008061	GO:0016020; GO:0016021	FALSE	3.75348	0.340418		II	9475055	9476375	1321	+	0	0	8.67232	0	0	0	0	0	0.460514	0	0	0
WBGene00012021	T25E12.6.1	T25E12.6	protein_coding	protein_coding	WBGene00012021	0.433	1164				FALSE	3.75348	0.340418		V	16742423	16744881	2459	+	0	0	8.67232	0	0	0	0	0	0.442315	0	0	0
WBGene00013940	ZK218.6.1	nhr-248	protein_coding	protein_coding	WBGene00013940	0.3782	1071	GO:0006355	GO:0003677; GO:0003700; GO:0008270; GO:0043565; GO:0046872	GO:0005634	FALSE	3.75348	0.340418		V	17103410	17104627	1218	-	0	0	8.67232	0	0	0	0	0	0.480723	0	0	0
WBGene00017382	F11D5.5.1	F11D5.5	protein_coding	protein_coding	WBGene00017382	0.3673	1149	GO:0015749; GO:0055085	GO:0015149; GO:0022857	GO:0016020; GO:0016021	FALSE	3.75348	0.340418		X	3302070	3303927	1858	+	0	0	8.67232	0	0	0	0	0	0.448089	0	0	0
WBGene00008118	C46F11.3.1	madf-8	protein_coding	protein_coding	WBGene00008118	0.3823	1109	GO:0006357		GO:0005634; GO:0005667	TRUE	3.75304	3.7528e-15	3.80713e-14	III	3648792	3650832	2041	-	701.478	1477.46	690.317	99.0729	42.1722	71.0284	34.5627	66.3739	36.9544	2.79375	1.18309	2.21782	5
WBGene00001829	ZK1055.1.1	hcp-1	protein_coding	protein_coding	WBGene00001829	0.4426	4666	GO:0000070; GO:0000212; GO:0008104; GO:0031134; GO:0051257; GO:0051307; GO:0051316; GO:0051382	GO:0005515	GO:0000776; GO:0005634; GO:0005819	TRUE	3.75203	3.14986e-11	2.22787e-10	V	6594194	6599208	5015	+	845.188	885.954	688.582	88.7528	15.8146	74.2569	9.89769	9.45975	8.76113	0.594843	0.105447	0.551084	5
WBGene00001853	Y73B6BL.9a.1; Y73B6BL.9b.1	hil-2	protein_coding	protein_coding	WBGene00001853	0.4772	636	GO:0006334; GO:0030261; GO:0045910	GO:0003677; GO:0003690; GO:0031492	GO:0000786; GO:0005634; GO:0005694	TRUE	3.74386	1.8988e-22	3.25129e-21	IV	6294234	6295219	986	+	15449	24867.3	24875.7	1263.18	1192.68	2409.58	1326.26	1946.45	2320.2	62.0628	58.2975	131.09	5
WBGene00004764	K04G11.2.1	sel-7	protein_coding	protein_coding	WBGene00004764	0.4133	1783	GO:0000122; GO:0040034; GO:0042659; GO:0042661; GO:0045747; GO:0046331	GO:0005515; GO:0042802; GO:0043565	GO:0005634	TRUE	3.74372	6.78011e-17	7.95695e-16	X	14332770	14340481	7712	-	1317.61	676.191	882.842	103.201	40.8543	69.9522	40.3796	18.8943	29.3955	1.81008	0.712869	1.35855	5
WBGene00044149	T24D5.6.1; T24D5.6.2	T24D5.6	protein_coding	protein_coding	WBGene00044149	0.474	954				TRUE	3.74314	0.0894713	0.13281	X	12603622	12604708	1087	+	7.17694	7.03323	1.95823	0	0	1.16517	0.41107	0.367299	0.121861	0	0	0.0422927
WBGene00004042	C14B9.4a.1; C14B9.4b.1	plk-1	protein_coding	protein_coding	WBGene00004042	0.4496	2296	GO:0000278; GO:0006468; GO:0007049; GO:0007052; GO:0007077; GO:0007098; GO:0007147; GO:0016310; GO:0032465; GO:0040038; GO:0045132; GO:0051301; GO:0051321; GO:0051726; GO:0110039	GO:0000166; GO:0004672; GO:0004674; GO:0004712; GO:0005515; GO:0005524; GO:0016301; GO:0016740; GO:0106310	GO:0000775; GO:0000776; GO:0000793; GO:0000922; GO:0005634; GO:0005694; GO:0005737; GO:0005813; GO:0005815; GO:0005856; GO:0030496; GO:0051233	TRUE	3.73906	4.36981e-20	6.24708e-19	III	8101348	8104076	2729	+	1795.54	2216.84	1651.21	217.754	81.7087	123.762	42.7315	48.1034	42.6952	2.96592	1.10718	1.86655	5
WBGene00020851	T27B7.5a.1; T27B7.5b	nhr-227	protein_coding	protein_coding	WBGene00020851	0.3738	984	GO:0006355	GO:0003677; GO:0003700; GO:0008270; GO:0043565; GO:0046872	GO:0005634	TRUE	3.7369	5.23179e-10	3.2459e-09	V	2285432	2287520	2089	+	180.05	250.803	234.153	24.7682	3.95364	20.4476	9.99823	12.6985	14.1271	0.787163	0.125005	0.719568	5
WBGene00001832	T03F1.9.1; T03F1.9.2	hcp-4	protein_coding	protein_coding	WBGene00001832	0.4536	2733	GO:0000070; GO:0000278; GO:0007080; GO:0008608; GO:0046603; GO:0051382; GO:0070199; GO:0090307; GO:0098813	GO:0005515	GO:0000775; GO:0000776; GO:0000779; GO:0000793; GO:0005634; GO:0005654; GO:0005694; GO:0005737	TRUE	3.73176	1.67999e-28	4.12279e-27	I	3862775	3865938	3164	-	1019.18	1599.93	907.125	93.9128	77.755	93.6283	20.3768	29.1658	19.705	1.07461	0.88514	1.1863	5
WBGene00235264	M04G7.5.1	M04G7.5	protein_coding	protein_coding	WBGene00235264	0.4868	228				FALSE	3.73145	0.343316		IV	455073	455401	329	+	4.9555	3.25718	0	0	0	0	1.18762	0.711739	0	0	0	0
WBGene00008062	C41G7.4.1	set-32	protein_coding	protein_coding	WBGene00008062	0.3896	1653				TRUE	3.72907	0.013837	0.025665	I	9519244	9521275	2032	+	6.60733	28.0118	8.67232	1.03201	0	2.15237	0.218413	0.84427	0.311467	0.0195243	0	0.045089
WBGene00000098	K07C11.2.1; K07C11.2.2	air-1	protein_coding	protein_coding	WBGene00000098	0.4032	1382	GO:0006468; GO:0007052; GO:0016310; GO:0032465; GO:0035404; GO:0090307; GO:1904781	GO:0000166; GO:0004672; GO:0004674; GO:0004712; GO:0005515; GO:0005524; GO:0016301; GO:0016740; GO:0035174; GO:0106310	GO:0000235; GO:0000794; GO:0005813; GO:0005828; GO:0005876; GO:0031616; GO:0032133; GO:0051233	TRUE	3.7287	4.95211e-19	6.62632e-18	V	8221410	8223587	2178	+	1090.21	1097.02	894.983	104.233	36.9007	90.3997	43.1049	39.5476	38.4464	2.35864	0.83071	2.26509	5
WBGene00077489	C04G6.13.1	C04G6.13	protein_coding	protein_coding	WBGene00077489	0.3925	800				FALSE	3.72832	0.156697		II	5094245	5095370	1126	+	0	22.8003	5.20339	2.06402	0	0	0	1.41992	0.386141	0.0806842	0	0
WBGene00001185	F38G1.2.1	egl-17	protein_coding	protein_coding	WBGene00001185	0.384	815	GO:0001934; GO:0008284; GO:0008543; GO:0009887; GO:0010628; GO:0030154; GO:0030334; GO:0046662	GO:0005104; GO:0005105; GO:0005111; GO:0008083	GO:0005615; GO:0005737	TRUE	3.72417	1.15365e-09	6.87935e-09	X	489695	492273	2579	+	363.403	140.059	317.407	29.9283	7.90729	23.6761	24.3644	8.56183	23.1211	1.14839	0.301851	1.00595
WBGene00002231	C02F5.1.1	knl-1	protein_coding	protein_coding	WBGene00002231	0.415	3376	GO:0000212; GO:0007049; GO:0007059; GO:0007094; GO:0030953; GO:0034501; GO:0043060; GO:0045184; GO:0051301; GO:0051307; GO:0051321; GO:0051382; GO:1903394; GO:1905342	GO:0005515; GO:0008017; GO:0044877	GO:0000775; GO:0000776; GO:0000785; GO:0000940; GO:0005694; GO:0005737; GO:0005938	TRUE	3.69661	5.32148e-10	3.29986e-09	III	8250636	8254286	3651	+	1370.47	1203.2	1271.36	150.673	22.404	122.685	22.1816	17.7562	22.3571	1.39572	0.206465	1.25839	5
WBGene00019159	H05C05.3.1	H05C05.3	protein_coding	protein_coding	WBGene00019159	0.4201	1176				FALSE	3.6949	0.0866947		III	2967048	2968932	1885	-	8.25916	3.90862	3.46893	1.03201	0	0	0.383755	0.165588	0.175121	0.0274436	0	0
WBGene00003886	R31.3.1	osm-6	protein_coding	protein_coding	WBGene00003886	0.3706	1457	GO:0006935; GO:0006970; GO:0042073; GO:0050954; GO:0060271; GO:1902075; GO:1905515	GO:0003674	GO:0005737; GO:0005814; GO:0005929; GO:0030992; GO:0035869; GO:0036064; GO:0043025; GO:0097730	TRUE	3.69351	2.00413e-07	9.13729e-07	V	11924632	11927406	2775	-	70.4782	144.619	398.927	16.5121	14.4967	16.1428	2.64314	4.94514	16.2548	0.354412	0.309551	0.383659
WBGene00015129	B0303.8.1	sdz-1	protein_coding	protein_coding	WBGene00015129	0.3503	805	GO:0048382	GO:0003674	GO:0005575	TRUE	3.69164	0.00993165	0.0190931	III	8699481	8700333	853	-	22.575	79.4752	60.7062	12.3841	0	0	1.53235	4.91869	4.477	0.481098	0	0
WBGene00010779	K11H3.2.1	K11H3.2	protein_coding	protein_coding	WBGene00010779	0.3936	752				FALSE	3.69161	0.238834		III	9846393	9847521	1129	+	1.10122	1.95431	5.20339	0	0	0	0.080017	0.129476	0.410788	0	0	0
WBGene00044588	ZK1236.9a.1; ZK1236.9b.1	ZK1236.9	protein_coding	protein_coding	WBGene00044588	0.3486	764				TRUE	3.68699	0.00156871	0.00363346	III	8432469	8435174	2706	-	46.2513	34.5261	46.8305	0	9.22517	1.07619	3.30577	2.25001	3.63664	0	0.375422	0.0487457
WBGene00009381	F34H10.4.1	F34H10.4	protein_coding	protein_coding	WBGene00009381	0.3801	1376				TRUE	3.68624	3.84231e-06	1.4466e-05	X	9648532	9650928	2397	+	64.9721	119.864	53.7684	6.19205	1.31788	10.7619	2.58008	4.33995	2.31984	0.140728	0.0297976	0.270829
WBGene00008710	F11E6.7.1	F11E6.7	protein_coding	protein_coding	WBGene00008710	0.4233	3180	GO:0000723		GO:0005634	TRUE	3.67913	3.87707e-20	5.58879e-19	IV	17457834	17461272	3439	-	774.159	1041.65	648.689	80.4967	36.9007	74.2569	13.3024	16.3195	12.1104	0.791618	0.361019	0.808603	5
WBGene00014156	ZK930.6.1	ZK930.6	protein_coding	protein_coding	WBGene00014156	0.4369	840	GO:0006508	GO:0004176; GO:0004252		TRUE	3.67666	4.85951e-05	0.000152188	II	11885588	11886601	1014	+	287.969	232.563	280.983	28.8962	0	33.3618	18.7324	13.7935	19.8587	1.07579	0	1.37529
WBGene00011499	T05G5.4.1	T05G5.4	protein_coding	protein_coding	WBGene00011499	0.3383	600			GO:0016020; GO:0016021	FALSE	3.67599	0.103674		III	9748863	9749673	811	+	3.85428	9.77155	1.73446	1.03201	0	0	0.351008	0.811382	0.171618	0.0537894	0	0
WBGene00017736	F23C8.7.1	F23C8.7	protein_coding	protein_coding	WBGene00017736	0.4746	1437	GO:0006468; GO:0007169; GO:0016310; GO:0018108; GO:0030154; GO:0045087	GO:0000166; GO:0004672; GO:0004712; GO:0004713; GO:0004715; GO:0005102; GO:0005524; GO:0016301; GO:0016740	GO:0031234	TRUE	3.67529	6.96556e-16	7.49277e-15	I	2422334	2425185	2852	-	1586.86	796.707	2393.56	154.801	118.609	100.085	60.3403	27.622	98.8865	3.36886	2.56794	2.41179	5
WBGene00006211	T08B6.6.1	str-166	protein_coding	protein_coding	WBGene00006211	0.3769	1064	GO:0007186; GO:0042048; GO:0050911	GO:0038022	GO:0005887; GO:0016020; GO:0016021	FALSE	3.67394	0.244616		IV	4884296	4886897	2602	+	1.65183	4.56006	1.73446	0	0	0	0.0848301	0.213522	0.0967772	0	0	0
WBGene00019809	R01H2.1.1	R01H2.1	protein_coding	protein_coding	WBGene00019809	0.4794	315				FALSE	3.6736	0.24216		III	7062880	7063194	315	+	1.65183	1.30287	5.20339	0	0	0	0.286537	0.206065	0.980675	0	0	0
WBGene00043984	C56E6.7.1	C56E6.7	protein_coding	protein_coding	WBGene00043984	0.4098	915				FALSE	3.67235	0.35117		II	6516359	6518380	2022	+	0	4.64359	4.10249	0	0	0	0	0.25284	0.26618	0	0	0
WBGene00017721	F22F7.3.1	F22F7.3	protein_coding	protein_coding	WBGene00017721	0.4022	1651		GO:0016740; GO:0016757	GO:0016020; GO:0016021	TRUE	3.66381	0.0209985	0.0372007	V	2110704	2114488	3785	+	12.1134	14.983	13.8757	3.09603	0	0	0.400909	0.452133	0.49895	0.0586439	0	0
WBGene00194682	F40D4.17.1	F40D4.17	protein_coding	protein_coding	WBGene00194682	0.4472	445				FALSE	3.66322	0.0827916		V	17154643	17155430	788	-	4.40489	5.86293	5.20339	0	0	1.07619	0.540879	0.656399	0.694186	0	0	0.0837439
WBGene00001939	H02I12.7.1	his-65	protein_coding	protein_coding	WBGene00001939	0.5	506		GO:0003677; GO:0046982	GO:0000786	TRUE	3.66049	1.089e-18	1.435e-17	IV	11401059	11401564	506	+	528.886	923.88	432.657	56.0705	53.2313	41.341	57.1133	90.9659	50.7624	3.46536	3.27296	2.82915	5
WBGene00001016	F43G6.1.1	dna-2	protein_coding	protein_coding	WBGene00001016	0.4497	3302	GO:0006259; GO:0032508; GO:0071932	GO:0000014; GO:0003723; GO:0004386; GO:0017108; GO:0017116; GO:0043139	GO:0005634; GO:0005737	TRUE	3.65999	2.00571e-15	2.06938e-14	II	11778435	11782231	3797	+	524.181	413.011	355.565	53.6645	28.9934	19.3714	8.67421	6.23157	6.3928	0.508247	0.273178	0.203146	5
WBGene00000871	C37A2.4a.1; C37A2.4b.1	cye-1	protein_coding	protein_coding	WBGene00000871	0.3855	2076	GO:0000079; GO:0000082; GO:0006468; GO:0007049; GO:0007088; GO:0007281; GO:0008284; GO:0008406; GO:0009791; GO:0009792; GO:0010608; GO:0040026; GO:0042023; GO:0044772; GO:0045931; GO:0048815; GO:0051301; GO:0051321; GO:0051445; GO:0051729; GO:0051782; GO:1904776; GO:1904781	GO:0005515; GO:0016538	GO:0000307; GO:0000785; GO:0005634; GO:0005737; GO:0005813; GO:0005814; GO:0005856; GO:0097134	TRUE	3.65836	0.000772326	0.0019151	I	6780806	6784396	3591	+	290.172	228.654	218.542	51.6004	0	6.45712	7.63754	5.48738	6.24967	0.777304	0	0.107705
WBGene00009754	F46A9.1.1	F46A9.1	protein_coding	protein_coding	WBGene00009754	0.3519	1165				FALSE	3.65795	0.353101		I	9457456	9458842	1387	+	0	7.81724	0	0	0	0	0	0.334303	0	0	0	0
WBGene00022311	Y77E11A.8.1	Y77E11A.8	protein_coding	protein_coding	WBGene00022311	0.4236	1053				FALSE	3.65795	0.353101		IV	1423095	1425062	1968	-	0	7.7848	0	0	0	0	0	0.368326	0	0	0	0
WBGene00006155	F10A3.6.1	str-99	protein_coding	protein_coding	WBGene00006155	0.3698	1014	GO:0007186; GO:0042048; GO:0050911	GO:0038022	GO:0005887; GO:0016020; GO:0016021	FALSE	3.64838	0.354387		V	16157335	16158491	1157	-	2.75305	0	5.20339	0	0	0	0.148355	0	0.304648	0	0	0
WBGene00010310	F59B2.8.1	F59B2.8	protein_coding	protein_coding	WBGene00010310	0.3471	1308	GO:0009790			TRUE	3.64805	1.79056e-33	5.86675e-32	III	9007974	9010121	2148	-	1239.42	1414.27	1358.09	73.2726	122.563	124.838	51.7771	53.8688	61.6408	1.75186	2.91524	3.30494	5
WBGene00010580	K05C4.3.1	K05C4.3	protein_coding	protein_coding	WBGene00010580	0.3557	1563			GO:0031462	TRUE	3.64671	0.0453876	0.0737974	I	14748538	14753138	4601	-	1.65183	27.3603	26.017	0	0	4.30475	0.0577474	0.872119	0.988204	0	0	0.0953706
WBGene00011429	T04C12.7.1	T04C12.7	protein_coding	protein_coding	WBGene00011429	0.3735	680			GO:0016020; GO:0016021	FALSE	3.64668	0.354616		V	11054127	11055142	1016	+	4.40489	0	3.46893	0	0	0	0.353958	0	0.302856	0	0	0
WBGene00012547	Y37D8A.5.1	Y37D8A.5	protein_coding	protein_coding	WBGene00012547	0.5094	1007			GO:0016020; GO:0016021	FALSE	3.64668	0.354616		III	12854051	12855315	1265	-	4.40489	0	3.46893	0	0	0	0.239018	0	0.20451	0	0	0
WBGene00006170	C13B7.5.1	str-119	protein_coding	protein_coding	WBGene00006170	0.4615	1014	GO:0007186; GO:0042048; GO:0050911	GO:0038022	GO:0005887; GO:0016020; GO:0016021	FALSE	3.645	0.354842		V	2426479	2428124	1646	-	6.04609	0	1.72952	0	0	0	0.325808	0	0.10126	0	0	0
WBGene00020365	T08G2.2.1	T08G2.2	protein_coding	protein_coding	WBGene00020365	0.4136	1383			GO:0016020; GO:0016021	FALSE	3.645	0.354842		X	17205243	17209365	4123	-	6.05672	0	1.73446	0	0	0	0.239299	0	0.0744547	0	0	0
WBGene00006201	Y9C9A.10.1	str-155	protein_coding	protein_coding	WBGene00006201	0.3715	1023	GO:0007186; GO:0042048; GO:0050911	GO:0038022	GO:0005887; GO:0016020; GO:0016021	FALSE	3.64335	0.355064		IV	4915989	4917553	1565	+	7.70855	0	0	0	0	0	0.41174	0	0	0	0	0
WBGene00010093	F55C5.4.1	capg-2	protein_coding	protein_coding	WBGene00010093	0.3889	3212	GO:0000070	GO:0005515	GO:0000796; GO:0005634	TRUE	3.64059	2.40959e-18	3.09772e-17	V	12271873	12275676	3804	+	869.414	742.638	855.091	89.7848	31.6292	75.3331	14.7903	11.519	15.8047	0.874162	0.306362	0.812149	5
WBGene00003405	ZC302.1.1; ZC302.1.2; ZC302.1.3	mre-11	protein_coding	protein_coding	WBGene00003405	0.3976	2485	GO:0000723; GO:0000724; GO:0006281; GO:0006302; GO:0006303; GO:0006974; GO:0007095; GO:0031573; GO:0042138; GO:0051321; GO:0097552	GO:0000014; GO:0004518; GO:0004519; GO:0004520; GO:0004527; GO:0008296; GO:0016787; GO:0030145	GO:0005634; GO:0030870; GO:0035861	TRUE	3.64044	9.86685e-22	1.58013e-20	V	10733931	10736892	2962	-	923.374	816.25	825.605	49.5364	51.3974	104.39	20.3038	16.3648	19.724	0.623395	0.643484	1.45465	5
WBGene00013849	ZC84.6.1	ZC84.6	protein_coding	protein_coding	WBGene00013849	0.4321	4712	GO:0010951	GO:0004867		TRUE	3.63577	5.33724e-05	0.000165821	III	9192983	9199507	6525	-	593.008	353.73	794.384	5.16004	18.4503	116.228	6.87671	3.74007	10.0086	0.0342463	0.121821	0.854145
WBGene00021658	Y48G1A.2.1	Y48G1A.2	protein_coding	protein_coding	WBGene00021658	0.456	728				TRUE	3.63566	0.0187543	0.0336616	I	347469	348357	889	+	37.4415	48.2063	8.67232	0	0	7.53331	2.81027	3.29903	0.707218	0	0	0.358327
WBGene00018252	F40H3.6.1	F40H3.6	protein_coding	protein_coding	WBGene00018252	0.4456	671				FALSE	3.63152	0.0590154		II	6187010	6187722	713	-	2.75305	10.423	13.8757	2.06402	0	0	0.224191	0.773897	1.22767	0.0961957	0	0
WBGene00001932	F54E12.4.1	his-58	protein_coding	protein_coding	WBGene00001932	0.4891	503		GO:0003677; GO:0046982	GO:0000786	TRUE	3.63116	6.87971e-21	1.03094e-19	IV	11339630	11340132	503	-	813.043	911.086	478.573	60.557	73.0121	45.6313	88.3224	90.2412	56.4846	3.76497	4.51596	3.14138	5
WBGene00012306	W06F12.2a.1; W06F12.2b.1; W06F12.2c.1; W06F12.2d.1; W06F12.2e.1	W06F12.2	protein_coding	protein_coding	WBGene00012306	0.4682	1910			GO:0016020; GO:0016021	TRUE	3.63068	1.98596e-10	1.28816e-09	III	13726641	13731679	5039	-	1719.56	1727.61	1550.61	67.0805	65.8941	270.123	49.1936	45.0636	48.1968	1.09832	1.07334	4.89727	5
WBGene00022488	Y119D3B.11.1; Y119D3B.11.2	orc-3	protein_coding	protein_coding	WBGene00022488	0.4586	1912				TRUE	3.62273	4.02481e-06	1.50828e-05	III	1208104	1213650	5547	+	357.346	435.16	213.339	50.5684	2.63576	27.9809	10.2124	11.339	6.62417	0.827097	0.0428886	0.506756
WBGene00017453	F14D2.5.1	F14D2.5	protein_coding	protein_coding	WBGene00017453	0.5325	385				FALSE	3.62145	0.358025		II	3340556	3341260	705	+	1.10122	6.51436	0	0	0	0	0.156293	0.842995	0	0	0	0
WBGene00011739	T12G3.4.1; T12G3.4.2	T12G3.4	protein_coding	protein_coding	WBGene00011739	0.4094	1426	GO:0009058	GO:0016844	GO:0016020; GO:0016021	TRUE	3.61951	1.92736e-13	1.7055e-12	IV	12048256	12049943	1688	+	774.707	775.858	884.577	58.8245	27.6755	110.847	29.6855	27.1067	36.8269	1.29004	0.603808	2.69173	5
WBGene00000469	ZK909.4.1	ces-2	protein_coding	protein_coding	WBGene00000469	0.4112	1002	GO:0006355; GO:0006357; GO:0006915; GO:0007568; GO:0043068; GO:0045944	GO:0000977; GO:0000978; GO:0000981; GO:0003677; GO:0003700; GO:0005515; GO:0042802; GO:0046982; GO:1990837	GO:0005634	FALSE	3.61836	0.358443		I	14961501	14965361	3861	+	0	2.60575	5.20339	0	0	0	0	0.129562	0.308296	0	0	0
WBGene00019425	K06A1.2a.1; K06A1.2b.1	K06A1.2	protein_coding	protein_coding	WBGene00019425	0.3939	1321			GO:0016020; GO:0016021	FALSE	3.61836	0.358443		II	6444010	6446134	2125	+	0	2.60575	5.20339	0	0	0	0	0.0982749	0.233848	0	0	0
WBGene00016349	C33E10.8.1	C33E10.8	protein_coding	protein_coding	WBGene00016349	0.3945	1227				TRUE	3.61825	0.000240738	0.000662685	X	17293094	17294828	1735	-	31.9354	34.5261	53.7684	6.19205	0	3.22856	1.42218	1.4019	2.60155	0.157817	0	0.091115
WBGene00013038	Y49E10.19.1	ani-1	protein_coding	protein_coding	WBGene00013038	0.4636	3820	GO:0000281; GO:0000915; GO:0007049; GO:0008104; GO:0009792; GO:0030590; GO:0030865; GO:0031106; GO:0040002; GO:0040011; GO:0040035; GO:0040038; GO:0045138; GO:0051017; GO:0051301; GO:0051321	GO:0008017; GO:0031267; GO:0051015	GO:0005634; GO:0005737; GO:0005819; GO:0005826; GO:0005856; GO:0005874; GO:0005938; GO:0030426; GO:0030496; GO:0031252; GO:0032154	TRUE	3.61744	2.08452e-39	1.01083e-37	III	12446353	12453202	6850	-	3114.25	4083.86	2591.29	293.091	238.537	265.818	44.5468	53.2624	40.2719	2.3994	1.94274	2.40961	5
WBGene00005405	ZC132.7.1	srh-192	protein_coding	protein_coding	WBGene00005405	0.3411	1032			GO:0016020; GO:0016021	TRUE	3.61442	0.010402	0.0198932	V	4311993	4315157	3165	-	29.733	21.4974	39.8927	7.22406	0	0	1.57429	1.03781	2.29489	0.218911	0	0
WBGene00020664	T21H3.5a.1; T21H3.5b	T21H3.5	protein_coding	protein_coding	WBGene00020664	0.4174	1265			GO:0016020; GO:0016021	TRUE	3.61276	2.37262e-08	1.21569e-07	V	1158251	1164293	6043	-	93.0532	97.064	195.994	9.28808	17.1325	5.38094	4.01945	3.8228	9.19819	0.229615	0.421359	0.147297
WBGene00023172	Y23H5A.8a.1; Y23H5A.8b	Y23H5A.8	protein_coding	protein_coding	WBGene00023172	0.4766	479				TRUE	3.6112	0.00757778	0.0150058	I	2632987	2634561	1575	+	17.2265	26.9418	8.93254	3.55698	0	1.42885	1.96511	2.80224	1.1071	0.232226	0	0.103295
WBGene00013764	Y113G7B.15.1	Y113G7B.15	protein_coding	protein_coding	WBGene00013764	0.4536	1089	GO:0006508; GO:0051603	GO:0004197; GO:0008233; GO:0008234; GO:0016787	GO:0005615; GO:0005764; GO:0110165	TRUE	3.60551	0.0379355	0.0629128	V	20228966	20233843	4878	-	7.15794	15.6345	3.46893	1.03201	0	1.07619	0.359158	0.715268	0.189111	0.0296361	0	0.0342204
WBGene00004963	C17D12.6a.1; C17D12.6b.1	spe-9	protein_coding	protein_coding	WBGene00004963	0.4708	1592	GO:0007155; GO:0007338	GO:0005102; GO:0005509	GO:0005737; GO:0005886; GO:0009986; GO:0016020; GO:0016021; GO:0031143; GO:0043227	FALSE	3.60418	0.360369		I	11582743	11586069	3327	-	0	5.86293	1.73446	0	0	0	0	0.183478	0.0646802	0	0	0
WBGene00013145	Y53C12B.6.1	cutl-2	protein_coding	protein_coding	WBGene00013145	0.4026	1160				FALSE	3.60418	0.360369		II	9721828	9724526	2699	-	0	5.86293	1.73446	0	0	0	0	0.251808	0.088768	0	0	0
WBGene00003161	Y69A2AR.30a.1; Y69A2AR.30a.2; Y69A2AR.30a.3; Y69A2AR.30b.1; Y69A2AR.30b.2; Y69A2AR.30c.1	mdf-2	protein_coding	protein_coding	WBGene00003161	0.4299	756	GO:0007049; GO:0007094; GO:0009792; GO:0034059; GO:0051301; GO:0051726	GO:0005515	GO:0000776; GO:0005634; GO:0005654; GO:0005737; GO:0005813; GO:0045120; GO:0051233	TRUE	3.59772	6.13381e-16	6.63338e-15	IV	2636228	2641117	4890	-	180.049	312.038	289.656	16.5121	21.0861	26.9047	13.0135	20.5636	22.7462	0.683041	0.867756	1.23234	1
WBGene00045056	F13H10.9.1	F13H10.9	protein_coding	protein_coding	WBGene00045056	0.4038	582			GO:0016020; GO:0016021	TRUE	3.59436	0.000787323	0.00194949	IV	11002119	11003801	1683	+	23.1257	37.7833	45.0961	2.06402	0	6.45712	2.17118	3.23438	4.60007	0.110906	0	0.384186
WBGene00017858	F27C1.11.1	F27C1.11	protein_coding	protein_coding	WBGene00017858	0.3842	4084	GO:0035556			TRUE	3.58016	0.000576223	0.0014691	I	5433907	5443026	9120	-	33.0366	42.9948	43.3616	7.22406	2.63576	0	0.442014	0.524498	0.630331	0.0553173	0.0200791	0
WBGene00004955	F56A3.4.1; F56A3.4.2	spd-5	protein_coding	protein_coding	WBGene00004955	0.4222	3858	GO:0007049; GO:0007098; GO:0007274; GO:0008104; GO:0033365; GO:0045977; GO:0048167; GO:0048790	GO:0005515; GO:0042802; GO:0098882	GO:0005737; GO:0005813; GO:0005815; GO:0005856; GO:0048788	TRUE	3.57666	6.53608e-36	2.62374e-34	I	5171285	5176664	5380	-	2773.98	3664.98	2643.32	287.93	193.729	278.732	39.2886	47.3286	40.6759	2.33394	1.56226	2.50179	5
WBGene00018272	F41C3.6.1	F41C3.6	protein_coding	protein_coding	WBGene00018272	0.3663	1021				TRUE	3.5758	0.00125467	0.0029731	II	4735113	4736850	1738	+	49.0044	105.533	268.842	8.25607	0	26.9047	2.62261	5.14962	15.6322	0.252879	0	0.912489
WBGene00000275	R06C7.8.1	bub-1	protein_coding	protein_coding	WBGene00000275	0.4406	3062	GO:0000212; GO:0000280; GO:0006468; GO:0007049; GO:0007094; GO:0008406; GO:0016310; GO:0034501; GO:0048598; GO:0048666; GO:0051257; GO:0051301; GO:0051307; GO:0051316; GO:0051321; GO:0051754; GO:0110039; GO:1903394; GO:1905342	GO:0000166; GO:0004672; GO:0004674; GO:0004712; GO:0005515; GO:0005524; GO:0016301; GO:0016740; GO:0043515; GO:0106310	GO:0000775; GO:0000776; GO:0005634; GO:0005694; GO:0005737; GO:0005938	TRUE	3.57545	1.22496e-33	4.09097e-32	I	7251941	7255223	3283	+	1424.43	1712.63	1153.42	142.417	118.609	99.0092	25.4192	27.8658	22.363	1.45453	1.20514	1.11969	5
WBGene00017832	F26F4.13.1	kbp-2	protein_coding	protein_coding	WBGene00017832	0.3556	613	GO:0007049; GO:0051301; GO:0051382	GO:0005515	GO:0000775; GO:0000776; GO:0000818; GO:0005634; GO:0005694	TRUE	3.57414	3.17758e-18	4.07207e-17	III	4903177	4903884	708	-	526.384	898.982	442.288	46.4404	65.8941	45.1999	46.921	73.0641	42.8345	2.36919	3.34433	2.5533	5
WBGene00206528	Y53H1A.7.1	Y53H1A.7	protein_coding	protein_coding	WBGene00206528	0.4789	474				TRUE	3.56793	0.000109114	0.000320055	I	11213762	11214696	935	+	30.2836	55.3721	31.2203	6.19205	1.31788	2.15237	3.49104	5.82004	3.91029	0.408527	0.086501	0.157241
WBGene00022099	Y69A2AR.28.1	Y69A2AR.28	protein_coding	protein_coding	WBGene00022099	0.4878	449				TRUE	3.56721	4.62114e-11	3.20492e-10	IV	2612432	2613061	630	-	207.03	215.625	97.13	17.5442	15.8146	10.7619	25.1948	23.9258	12.8427	1.22194	1.09581	0.829979	1
WBGene00015582	C07H6.9a.1; C07H6.9b.1	C07H6.9	protein_coding	protein_coding	WBGene00015582	0.3526	480			GO:0016020; GO:0016021	TRUE	3.56484	0.000324478	0.000869892	III	7498819	7499447	629	-	46.8019	77.5209	27.7514	7.22406	0	5.38094	5.32226	8.03784	3.42879	0.470168	0	0.387784
WBGene00001933	F55G1.2.1	his-59	protein_coding	protein_coding	WBGene00001933	0.4318	741		GO:0003677; GO:0046982	GO:0000786	TRUE	3.56403	1.0173e-16	1.18243e-15	IV	7488216	7488956	741	+	820.322	772.747	449.922	37.4437	81.7087	54.8855	60.4911	51.9556	36.0469	1.58025	3.43062	2.56487	1
WBGene00005324	T27A1.1.1	T27A1.1	protein_coding	protein_coding	WBGene00005324	0.4419	525			GO:0016020; GO:0016021	FALSE	3.5612	0.366249		II	503229	506014	2786	-	0	0.651436	6.93884	0	0	0	0	0.0618196	0.784652	0	0	0
WBGene00017459	F14D2.11.1; F14D2.11.2	F14D2.11	protein_coding	protein_coding	WBGene00017459	0.3573	709				FALSE	3.5612	0.366249		II	3341268	3342104	837	-	0	0.651436	6.93786	0	0	0	0	0.0457439	0.580527	0	0	0
WBGene00012356	W09D6.1a.1; W09D6.1b.1; W09D6.1c.1	W09D6.1	protein_coding	protein_coding	WBGene00012356	0.4764	2666	GO:0043041			TRUE	3.56023	3.23757e-11	2.28609e-10	III	11068858	11072981	4124	+	211.985	407.148	294.858	36.1203	10.5431	30.1332	4.34481	7.60861	6.56602	0.423698	0.123035	0.391391	5
WBGene00011691	T10C6.10a.1; T10C6.10b.1	T10C6.10	protein_coding	protein_coding	WBGene00011691	0.4264	1080	GO:0009790			TRUE	3.55699	1.89212e-12	1.51707e-11	V	16036413	16038293	1881	+	441.452	187.89	275.531	22.6528	18.4693	35.0664	22.335	8.66749	15.1459	0.655939	0.532047	1.12433	1
WBGene00185005	T03F6.10.1	T03F6.10	protein_coding	protein_coding	WBGene00185005	0.3098	439				TRUE	3.54788	1.93923e-07	8.86476e-07	III	13377830	13378342	513	-	203.175	430.6	81.5198	16.5121	28.9934	16.1428	25.289	48.8678	11.0242	1.17626	2.05474	1.27333
WBGene00017386	F11G11.8.1	nspd-5	protein_coding	protein_coding	WBGene00017386	0.4971	348				FALSE	3.54731	0.36816		II	4860064	4860411	348	-	0	3.90862	3.46893	0	0	0	0	0.559574	0.591787	0	0	0
WBGene00003418	H26D21.2.1	msh-2	protein_coding	protein_coding	WBGene00003418	0.4248	2639	GO:0000003; GO:0006298; GO:0006312; GO:0006974; GO:0042771; GO:0043570	GO:0000166; GO:0000406; GO:0003677; GO:0003690; GO:0005524; GO:0030983	GO:0005634; GO:0032300; GO:0032301	TRUE	3.5449	2.71883e-16	3.04906e-15	I	3694296	3697549	3254	-	785.722	607.139	608.797	56.7605	28.9934	85.0188	16.2688	11.462	13.6956	0.672623	0.341808	1.11558	5
WBGene00017907	F28F9.3.1	F28F9.3	protein_coding	protein_coding	WBGene00017907	0.5294	323				FALSE	3.54146	0.24521		IV	3826872	3835895	9024	+	0	12.3773	1.73446	1.03201	0	0	0	1.90914	0.318795	0.0999185	0	0
WBGene00005987	T01D3.4a.1; T01D3.4b	srx-96	protein_coding	protein_coding	WBGene00005987	0.3481	781			GO:0016020; GO:0016021	FALSE	3.54108	0.369022		V	13711360	13713019	1660	+	0.550611	0	6.93786	0	0	0	0.0384983	0	0.527043	0	0	0
WBGene00018278	F41C6.4a.1; F41C6.4b.1	F41C6.4	protein_coding	protein_coding	WBGene00018278	0.3701	1200	GO:0006508; GO:0016485	GO:0004222	GO:0005886	FALSE	3.54108	0.369022		X	6873359	6874823	1465	-	0.550611	0	6.93786	0	0	0	0.025072	0	0.343236	0	0	0
WBGene00019991	R09H3.3.1; R09H3.3.2	R09H3.3	protein_coding	protein_coding	WBGene00019991	0.4652	1010				FALSE	3.54108	0.369022		X	1667019	1668848	1830	-	0.550611	0	6.93786	0	0	0	0.0297885	0	0.407806	0	0	0
WBGene00022141	Y71G12B.1a.1; Y71G12B.1b.1	chaf-2	protein_coding	protein_coding	WBGene00022141	0.481	1536	GO:0006334		GO:0005634; GO:0033186	TRUE	3.54031	6.41708e-13	5.36883e-12	I	1823447	1825967	2521	+	748.831	862.5	634.813	85.6567	23.7219	82.8664	26.639	27.9757	24.536	1.74395	0.480487	1.86815	5
WBGene00009385	F35B12.5a.1; F35B12.5a.2; F35B12.5b; F35B12.5c.1; F35B12.5c.2	sas-5	protein_coding	protein_coding	WBGene00009385	0.4086	1623	GO:0007049; GO:0007099	GO:0005515	GO:0005737; GO:0005814; GO:0005856	TRUE	3.54009	1.80891e-27	4.22533e-26	V	11610708	11613054	2347	+	1185.47	1827.93	1243.61	92.8808	143.649	130.218	39.9113	56.1118	45.4899	1.78967	2.75364	2.7783	5
WBGene00009225	F28F8.8a.1; F28F8.8b.1	fbxa-94	protein_coding	protein_coding	WBGene00009225	0.4232	966				FALSE	3.53952	0.369236		V	15571490	15574106	2617	+	3.85428	0	3.46893	0	0	0	0.218017	0	0.21319	0	0	0
WBGene00015065	B0228.8.1	B0228.8	protein_coding	protein_coding	WBGene00015065	0.3473	1365				FALSE	3.53952	0.369236		II	7759710	7761540	1831	-	3.85428	0	3.46893	0	0	0	0.154289	0	0.150873	0	0	0
WBGene00008978	F20D1.8.1	cutl-3	protein_coding	protein_coding	WBGene00008978	0.3968	1623			GO:0016020; GO:0016021	TRUE	3.53882	1.03789e-10	6.92101e-10	X	14994752	14999198	4447	-	1031.84	1446.19	2539.25	57.7925	216.133	158.2	34.7393	44.3936	92.8832	1.11357	4.14309	3.3753	5
WBGene00006896	F59F3.1.1	ver-3	protein_coding	protein_coding	WBGene00006896	0.3827	4212	GO:0006468; GO:0007169; GO:0007275; GO:0016310; GO:0018108; GO:0033674; GO:0045138	GO:0000166; GO:0004672; GO:0004712; GO:0004713; GO:0004714; GO:0005524; GO:0016301; GO:0016740	GO:0005886; GO:0005887; GO:0016020; GO:0016021; GO:0043235	TRUE	3.5388	4.44551e-19	5.97483e-18	X	10992483	10997846	5364	+	792.879	1410.36	764.899	59.8565	94.8875	101.162	10.2859	16.6823	10.7811	0.444414	0.70088	0.831673	5
WBGene00003671	C47F8.8.1	nhr-81	protein_coding	protein_coding	WBGene00003671	0.4527	1058	GO:0006355	GO:0003677; GO:0003700; GO:0008270; GO:0043565; GO:0046872	GO:0005634	FALSE	3.53878	0.369339		I	12328100	12329508	1409	-	5.50611	0	1.73446	0	0	0	0.284371	0	0.097326	0	0	0
WBGene00011315	T01C1.2.1	mbr-1	protein_coding	protein_coding	WBGene00011315	0.4218	1522	GO:0006357; GO:0007399	GO:0003677	GO:0005634	FALSE	3.53878	0.369339		X	10719554	10722054	2501	-	5.50611	0	1.73446	0	0	0	0.197677	0	0.067655	0	0	0
WBGene00016519	C39B5.1.1	srz-56	protein_coding	protein_coding	WBGene00016519	0.3679	1071			GO:0016020; GO:0016021	FALSE	3.53878	0.369339		III	2240771	2243843	3073	+	5.50611	0	1.73446	0	0	0	0.280919	0	0.0961446	0	0	0
WBGene00010035	F54C8.1.1	F54C8.1	protein_coding	protein_coding	WBGene00010035	0.4369	982	GO:0006629; GO:0006631; GO:0006635	GO:0003857; GO:0016491; GO:0016616; GO:0070403	GO:0005739; GO:0005759	FALSE	3.53872	0.0308935		III	9439699	9440929	1231	+	8.80977	6.51436	10.4068	1.03201	0	1.07619	0.490206	0.330502	0.62915	0.0328652	0	0.0379491
WBGene00206362	B0041.11.1; B0041.11.2; B0041.11.3	B0041.11	protein_coding	protein_coding	WBGene00206362	0.485	617				TRUE	3.53844	2.08894e-14	2.01146e-13	I	4661115	4662219	1105	-	451.476	669.809	282.494	29.9283	54.0331	37.5777	39.9635	54.059	27.1683	1.51618	2.72324	2.10794	1
WBGene00019584	K09F5.5.1	set-12	protein_coding	protein_coding	WBGene00019584	0.4174	1428	GO:0006355; GO:0010452; GO:0032259; GO:0034968	GO:0008168; GO:0016740; GO:0018024; GO:0046975	GO:0000785; GO:0005634	FALSE	3.53814	0.0409643		X	7733334	7736271	2938	-	2.75305	12.3773	12.1412	0	1.31788	1.07619	0.105345	0.431828	0.504759	0	0.0287125	0.0260967
WBGene00010155	F56F3.4.1	F56F3.4	protein_coding	protein_coding	WBGene00010155	0.3788	1378		GO:0008270; GO:0046872		FALSE	3.53383	0.370023		III	4468878	4470808	1931	+	0	7.1658	0	0	0	0	0	0.259077	0	0	0	0
WBGene00016491	C37A2.3.1	acdh-5	protein_coding	protein_coding	WBGene00016491	0.4091	1452		GO:0016491; GO:0016627; GO:0050660		TRUE	3.53365	0.0258445	0.0447261	I	6784854	6787139	2286	+	17.0689	8.46867	24.2825	4.12804	0	0	0.642341	0.290578	0.992832	0.0889082	0	0
WBGene00008308	C54E10.3.1	C54E10.3	protein_coding	protein_coding	WBGene00008308	0.4054	957			GO:0016020; GO:0016021	FALSE	3.52614	0.371088		V	18811005	18813481	2477	+	3.85428	3.25718	0	0	0	0	0.220068	0.169568	0	0	0	0
WBGene00011472	T05C12.9.1	T05C12.9	protein_coding	protein_coding	WBGene00011472	0.3565	965			GO:0016020; GO:0016021	FALSE	3.51286	0.109971		II	8191773	8193329	1557	-	3.85428	6.51436	3.46893	1.03201	0	0	0.218243	0.336324	0.213411	0.0334442	0	0
WBGene00008921	F17C11.10.1; F17C11.10.2	ctf-4	protein_coding	protein_coding	WBGene00008921	0.4052	3432	GO:0000278; GO:0006261; GO:0006281	GO:0003682	GO:0005634; GO:0031298; GO:0043596	TRUE	3.50862	2.30021e-19	3.16162e-18	V	10961722	10965562	3841	-	1306.05	1117.86	1052.82	154.801	85.6623	64.5712	20.794	16.2276	18.2119	1.41056	0.776543	0.651504	5
WBGene00019150	H04J21.1.1	H04J21.1	protein_coding	protein_coding	WBGene00019150	0.405	3099				FALSE	3.50201	0.1495		III	2366884	2372655	5772	-	21.4738	0	15.6102	0	0	3.22856	0.378628	0	0.299044	0	0	0.0360756
WBGene00044367	T05A8.8.1	T05A8.8	protein_coding	protein_coding	WBGene00044367	0.5251	459				TRUE	3.49961	0.00110243	0.00264492	II	2736678	2737556	879	+	43.4982	71.658	34.6893	3.09603	10.5431	0	5.17827	7.77796	4.48675	0.210939	0.714623	0
WBGene00000227	Y48G1BL.2a.1; Y48G1BL.2b.1	atm-1	protein_coding	protein_coding	WBGene00000227	0.4308	6594	GO:0000077; GO:0000723; GO:0006281; GO:0006468; GO:0006974; GO:0007049; GO:0008630; GO:0010212; GO:0016310; GO:0016572; GO:1904262	GO:0000166; GO:0004674; GO:0004712; GO:0005524; GO:0016301; GO:0016740; GO:0106310	GO:0000785; GO:0005634	TRUE	3.49884	1.81263e-38	8.32369e-37	I	183364	208465	25102	+	1139.76	1080.73	879.373	105.265	88.2981	80.714	9.44476	8.16549	7.91723	0.499229	0.416606	0.423863	5
WBGene00012132	T28F3.6.1	ifta-2	protein_coding	protein_coding	WBGene00012132	0.4164	807	GO:0006886; GO:0008104; GO:0008340; GO:0040024; GO:0048009	GO:0000166; GO:0003924; GO:0005525	GO:0005737; GO:0005856; GO:0005929; GO:0005930; GO:0012505; GO:0042995; GO:0097546	TRUE	3.49458	0.000295336	0.000798119	IV	17300809	17302033	1225	-	41.8464	51.4635	218.542	7.22406	18.4503	2.15237	2.83342	3.17716	16.0772	0.279945	0.711302	0.092357
WBGene00011320	T01C3.3.1	T01C3.3	protein_coding	protein_coding	WBGene00011320	0.4361	876	GO:0016567	GO:0046872; GO:0061630		FALSE	3.49408	0.375548		V	14991707	14992677	971	-	1.10122	5.86293	0	0	0	0	0.0686904	0.333445	0	0	0	0
WBGene00013392	Y62H9A.4.1; Y62H9A.4.2	Y62H9A.4	protein_coding	protein_coding	WBGene00013392	0.3929	719				TRUE	3.49266	0.0178398	0.0322265	X	11880124	11881264	1141	+	7.70855	7.81724	34.6893	1.03201	0	3.22856	0.585827	0.541674	2.86428	0.0448869	0	0.155491
WBGene00194643	C48D1.9a.1; C48D1.9b.1; C48D1.9c.1	C48D1.9	protein_coding	protein_coding	WBGene00194643	0.3938	651			GO:0016020; GO:0016021	FALSE	3.48962	0.284313		IV	13207468	13209666	2199	-	3.30366	1.95431	1.73446	0	0	0	0.277166	0.149495	0.158101	0	0	0
WBGene00021359	Y37E11AL.3a.1; Y37E11AL.3a.2; Y37E11AL.3b.1; Y37E11AL.3b.2	Y37E11AL.3	protein_coding	protein_coding	WBGene00021359	0.4593	777				TRUE	3.48751	1.26672e-26	2.78702e-25	IV	3694905	3698436	3532	+	589.704	735.474	534.215	67.0806	42.1723	55.9617	41.4705	47.1585	40.8173	2.69986	1.68861	2.494	5
WBGene00019347	K02H8.1a.1; K02H8.1a.2; K02H8.1b.1; K02H8.1b.2; K02H8.1b.3; K02H8.1c.1; K02H8.1c.2; K02H8.1c.3	mbl-1	protein_coding	protein_coding	WBGene00019347	0.4832	971	GO:0000381; GO:0008150	GO:0003723; GO:0046872	GO:0005634; GO:0005654; GO:0005737	TRUE	3.48743	1.50055e-12	1.21194e-11	X	16986629	17008462	21834	+	349.638	785.633	457.898	54.6964	61.9405	25.8285	19.6714	40.3018	27.9904	1.76123	1.98422	0.920907	1
WBGene00019811	R01H2.3.1; R01H2.3.2	egg-2	protein_coding	protein_coding	WBGene00019811	0.4423	1780	GO:0007338; GO:0030703; GO:1903078; GO:1904778	GO:0038023	GO:0005768; GO:0005886; GO:0010008; GO:0016020; GO:0016021	FALSE	3.48688	0.376555		III	7058516	7060597	2082	-	0	1.95431	5.20339	0	0	0	0	0.0546999	0.173546	0	0	0
WBGene00004391	T23G5.1.1; T23G5.1.2	rnr-1	protein_coding	protein_coding	WBGene00004391	0.4564	2551	GO:0006260; GO:0008152; GO:0009263	GO:0000166; GO:0003824; GO:0004748; GO:0005524; GO:0016491	GO:0005971	TRUE	3.4866	3.05577e-38	1.39793e-36	III	9225374	9228786	3413	-	4486.93	5511.8	4598.07	429.316	336.06	535.941	96.109	107.646	107.007	5.26297	4.09854	7.27498	5
WBGene00017774	F25B5.2a.1; F25B5.2a.2; F25B5.2b.1; F25B5.2b.2	nop-1	protein_coding	protein_coding	WBGene00017774	0.4289	2652	GO:0000281; GO:0007049; GO:0008595; GO:0051301	GO:0003674	GO:0005634; GO:0005737; GO:0005938; GO:0032154	TRUE	3.48418	2.50435e-29	6.50113e-28	III	5958722	5962322	3601	+	1907.31	2731.47	1626.93	157.897	213.497	189.409	39.2983	51.3141	36.4203	1.86194	2.50462	2.47316	5
WBGene00010859	M04C9.4.1	M04C9.4	protein_coding	protein_coding	WBGene00010859	0.4228	1450				FALSE	3.48312	0.369601		I	9355072	9357079	2008	-	0	0	13.8757	1.03201	0	0	0	0	0.568115	0.0222577	0	0
WBGene00003157	R10E4.4.1; R10E4.4.2	mcm-5	protein_coding	protein_coding	WBGene00003157	0.4258	2426	GO:0000727; GO:0006260; GO:0006270; GO:0007049; GO:0032508	GO:0000166; GO:0003677; GO:0003678; GO:0003688; GO:0003697; GO:0004386; GO:0005524; GO:0016787; GO:0016887; GO:0017116; GO:0043138	GO:0005634; GO:0005737; GO:0005829; GO:0042555	TRUE	3.47528	1.45578e-28	3.60173e-27	III	4288264	4291283	3020	-	2145.73	1696.99	1878.42	189.89	114.656	208.781	48.3293	34.85	45.9676	2.4478	1.47037	2.98006	5
WBGene00018613	F48E8.7a.1; F48E8.7b.1	skpt-1	protein_coding	protein_coding	WBGene00018613	0.4358	1550	GO:0000086; GO:0031146; GO:0051726		GO:0005634; GO:0005829; GO:0019005	TRUE	3.47252	4.13573e-09	2.31689e-08	III	5446510	5448419	1910	-	2093.42	1852.03	1521.12	246.651	39.5364	205.552	73.7991	59.5293	58.2616	4.9764	0.793577	4.59215
WBGene00002068	C27A2.3.1; C27A2.3.2	ify-1	protein_coding	protein_coding	WBGene00002068	0.429	1013	GO:0000281; GO:0007049; GO:0040038; GO:0050821; GO:0051298; GO:0051301; GO:0051306; GO:0051307; GO:0051321; GO:0051642; GO:0060471	GO:0002020; GO:0005515; GO:0031625	GO:0000793; GO:0005694; GO:0005737; GO:0005819; GO:0005856; GO:0005876	TRUE	3.46733	3.13411e-28	7.58379e-27	II	5054084	5055338	1255	-	1437.1	1814.9	1306.05	173.377	100.159	137.752	77.5179	89.2599	76.542	5.35239	3.07612	4.70883	5
WBGene00002047	Y39G10AR.13a.1; Y39G10AR.13a.2; Y39G10AR.13b.1	icp-1	protein_coding	protein_coding	WBGene00002047	0.4819	2079	GO:0000070; GO:0000278; GO:0000281; GO:0007079; GO:0007080; GO:0007143; GO:0016572; GO:0032147; GO:0045860; GO:0051257; GO:0051310; GO:0071902; GO:0090307; GO:0098813; GO:1902412	GO:0005515; GO:0030295; GO:0043539	GO:0000776; GO:0005634; GO:0005694; GO:0005737; GO:0005819; GO:0005856; GO:0030496; GO:0032133; GO:0043232; GO:1990385	TRUE	3.46551	1.63123e-06	6.52439e-06	I	2304512	2306816	2305	-	635.955	904.845	608.797	102.169	7.90729	83.9426	16.7147	21.6837	17.3847	1.53684	0.11833	1.39815
WBGene00012177	W01C9.4.1	decr-1.2	protein_coding	protein_coding	WBGene00012177	0.3967	1026	GO:0006635	GO:0008670; GO:0016491	GO:0005739	FALSE	3.46307	0.122266		II	8545652	8546854	1203	+	2.75305	7.1658	3.46893	0	0	1.07619	0.14662	0.347961	0.200723	0	0	0.0363217
WBGene00008035	C39E9.12.1	C39E9.12	protein_coding	protein_coding	WBGene00008035	0.4714	1345				TRUE	3.45536	1.43036e-13	1.28067e-12	IV	13094007	13095490	1484	+	496.651	407.799	322.61	59.8565	22.404	29.0571	20.1769	15.1056	14.2398	1.39173	0.518234	0.748092	5
WBGene00009705	F44F4.10.1	F44F4.10	protein_coding	protein_coding	WBGene00009705	0.4647	934				FALSE	3.4543	0.313293		II	10915901	10917274	1374	-	0.550611	4.56006	1.73446	0	0	0	0.0322124	0.243241	0.110247	0	0	0
WBGene00012700	Y39B6A.42.1; Y39B6A.42.2	Y39B6A.42	protein_coding	protein_coding	WBGene00012700	0.5023	434				TRUE	3.44636	0.00333954	0.00719098	V	18968021	18969640	1620	-	23.1257	35.1776	12.1412	3.09602	0	3.22856	2.91159	4.03822	1.66082	0.22309	0	0.2576
WBGene00000032	R09F10.2.1	abu-9	protein_coding	protein_coding	WBGene00000032	0.4645	1212	GO:0030968			FALSE	3.43923	0.186083		X	8322111	8323418	1308	+	0	30.348	3.46893	3.09603	2.72029e-07	0	0	1.2475	0.169919	0.0798853	6.9829e-09	0
WBGene00013723	Y106G6H.13.1	Y106G6H.13	protein_coding	protein_coding	WBGene00013723	0.4515	536				TRUE	3.43909	0.0761277	0.11555	I	10471185	10471960	776	+	11.0122	9.12011	3.46893	0	0	2.15237	1.12263	0.847713	0.38422	0	0	0.139052
WBGene00012210	W02D9.4.1	W02D9.4	protein_coding	protein_coding	WBGene00012210	0.3807	922				FALSE	3.43362	0.30473		I	12537903	12538986	1084	-	1.10122	3.90862	1.73446	0	0	0	0.0652633	0.211206	0.111682	0	0	0
WBGene00018952	F56C9.8.1	F56C9.8	protein_coding	protein_coding	WBGene00018952	0.3455	1230			GO:0016020; GO:0016021	TRUE	3.42834	2.00688e-07	9.14639e-07	III	7315903	7319595	3693	-	656.328	2882.61	851.622	60.8885	138.378	208.78	29.1569	116.76	41.1046	1.54809	3.50013	5.87773
WBGene00003055	F48E8.1a.1; F48E8.1a.2; F48E8.1b.1; F48E8.1c.1	lon-1	protein_coding	protein_coding	WBGene00003055	0.4741	1142	GO:0000003; GO:0030512; GO:0032876; GO:0040010; GO:0040015; GO:0042661; GO:1901048	GO:0005515	GO:0005615; GO:0005887; GO:0005912	TRUE	3.42685	2.14333e-31	6.15723e-30	III	5474478	5478005	3528	+	1210.79	1673.54	1410.12	148.609	100.159	149.59	57.9335	73.0102	73.3059	4.06954	2.72864	4.53589	5
WBGene00015912	C17F4.5.1	fbxc-50	protein_coding	protein_coding	WBGene00015912	0.4802	1160				TRUE	3.42511	4.67602e-08	2.31566e-07	II	3246316	3248174	1859	-	69.9276	127.03	79.7853	6.19205	6.58941	12.9142	3.29394	5.45585	4.08333	0.166933	0.176731	0.385511
WBGene00006411	F14D12.6a.1; F14D12.6b.1	octr-1	protein_coding	protein_coding	WBGene00006411	0.4132	1402	GO:0007165; GO:0007186; GO:0007187; GO:0007268; GO:0045824; GO:0071927; GO:0098664; GO:1900101; GO:1903894	GO:0004930; GO:0004989; GO:0004993; GO:0030594	GO:0005887; GO:0016020; GO:0016021; GO:0030425; GO:0045202	FALSE	3.42443	0.385354		X	5609155	5611250	2096	-	6.60734	0	0	0	0	0	0.257516	0	0	0	0	0
WBGene00018134	F37A4.4.1	F37A4.4	protein_coding	protein_coding	WBGene00018134	0.3849	3601				FALSE	3.42443	0.385354		III	6713583	6718022	4440	+	6.60733	0	0	0	0	0	0.10026	0	0	0	0	0
WBGene00022807	ZK697.7a.1; ZK697.7b.1	srab-25	protein_coding	protein_coding	WBGene00022807	0.3578	889			GO:0016020; GO:0016021	FALSE	3.42443	0.385354		V	1738927	1741157	2231	-	6.60733	0	0	0	0	0	0.405887	0	0	0	0	0
WBGene00022338	Y82E9BR.5.1	Y82E9BR.5	protein_coding	protein_coding	WBGene00022338	0.3976	1069				FALSE	3.42338	0.385502		III	1384820	1388350	3531	+	3.30366	0	3.46893	0	0	0	0.168867	0	0.192649	0	0	0
WBGene00009826	F47G4.5.1	F47G4.5	protein_coding	protein_coding	WBGene00009826	0.5219	868	GO:0007019; GO:0051013	GO:0005515; GO:0008017; GO:0008568	GO:0005737; GO:0005856; GO:0008352	FALSE	3.42285	0.385578		I	14060876	14062137	1262	-	1.65183	0	5.20339	0	0	0	0.103985	0	0.35589	0	0	0
WBGene00005182	T09D3.5.1	srg-25	protein_coding	protein_coding	WBGene00005182	0.3506	1101	GO:0007606	GO:0004888	GO:0016020; GO:0016021	FALSE	3.42231	0.385654		V	5342139	5344365	2227	-	0	0	6.93786	0	0	0	0	0	0.3741	0	0	0
WBGene00009625	F41E7.9.1	F41E7.9	protein_coding	protein_coding	WBGene00009625	0.4162	1545				FALSE	3.42231	0.385654		X	10312756	10316005	3250	-	0	0	6.93786	0	0	0	0	0	0.266591	0	0	0
WBGene00011671	T10B9.1.1	cyp-13A4	protein_coding	protein_coding	WBGene00011671	0.3832	1563		GO:0004497; GO:0005506; GO:0016491; GO:0016705; GO:0020037; GO:0046872		FALSE	3.42231	0.385654		II	9795848	9797740	1893	-	0	0	6.93786	0	0	0	0	0	0.263521	0	0	0
WBGene00015634	C09D4.3.1	C09D4.3	protein_coding	protein_coding	WBGene00015634	0.417	1525	GO:0006468; GO:0007165; GO:0016310; GO:0018105	GO:0000166; GO:0004672; GO:0004674; GO:0005524; GO:0016301	GO:0005634; GO:0005737	FALSE	3.42231	0.385654		I	5488309	5490626	2318	+	0	0	6.93786	0	0	0	0	0	0.270088	0	0	0
WBGene00016085	C25A8.5.1	C25A8.5	protein_coding	protein_coding	WBGene00016085	0.4733	1293	GO:0006468; GO:0007169; GO:0016310; GO:0018108; GO:0030154; GO:0045087	GO:0000166; GO:0004672; GO:0004712; GO:0004713; GO:0004715; GO:0005102; GO:0005524; GO:0016301; GO:0016740	GO:0031234	FALSE	3.42231	0.385654		IV	6999557	7001493	1937	+	0	0	6.94318	0	0	0	0	0	0.318793	0	0	0
WBGene00016430	C35A11.3a.1; C35A11.3b.1	C35A11.3	protein_coding	protein_coding	WBGene00016430	0.4997	778				FALSE	3.42231	0.385654		V	5372418	5375354	2937	+	0	0	6.93786	0	0	0	0	0	0.529073	0	0	0
WBGene00017450	F14D2.1.1	bath-27	protein_coding	protein_coding	WBGene00017450	0.3833	900				FALSE	3.42231	0.385654		II	3360221	3361354	1134	+	0	0	6.30377	0	0	0	0	0	0.415822	0	0	0
WBGene00017723	F22F7.6.1	bgnt-1.2	protein_coding	protein_coding	WBGene00017723	0.402	1286		GO:0016740		FALSE	3.42231	0.385654		V	2115490	2118644	3155	-	0	0	6.93786	0	0	0	0	0	0.320283	0	0	0
WBGene00022838	ZK993.2a.1; ZK993.2b.1	ZK993.2	protein_coding	protein_coding	WBGene00022838	0.3976	1374	GO:0016567	GO:0061630		FALSE	3.42231	0.385654		I	1107578	1112251	4674	+	0	0	6.93786	0	0	0	0	0	0.29977	0	0	0
WBGene00001536	ZK455.2.1	gcy-9	protein_coding	protein_coding	WBGene00001536	0.3874	3637	GO:0003031; GO:0006182; GO:0006468; GO:0007165; GO:0007168; GO:0009190; GO:0019722; GO:0035556; GO:0045921; GO:0050907; GO:0071468; GO:1904457	GO:0000166; GO:0001653; GO:0004383; GO:0004672; GO:0005524; GO:0005525; GO:0016829; GO:0046872	GO:0005886; GO:0005929; GO:0016020; GO:0016021; GO:0042995; GO:0043025; GO:0097730	FALSE	3.41647	0.027277		X	11332553	11338301	5749	-	3.85428	14.3316	17.3446	1.03201	0	2.15237	0.0579062	0.19632	0.28312	0.00887371	0	0.0204927
WBGene00003158	ZK632.1a.1; ZK632.1b.1	mcm-6	protein_coding	protein_coding	WBGene00003158	0.4276	2177	GO:0000727; GO:0006260; GO:0006268; GO:0006270; GO:0007049; GO:0032508; GO:1902969	GO:0000166; GO:0003677; GO:0003678; GO:0003697; GO:0004386; GO:0005515; GO:0005524; GO:0016787; GO:0016887; GO:0017116; GO:1990518	GO:0005634; GO:0042555	TRUE	3.41609	1.73582e-37	7.70816e-36	III	9794367	9798643	4277	+	3773.34	3373.14	3168.87	381.843	241.173	342.228	94.7093	77.195	86.4161	5.48519	3.44662	5.44355	5
WBGene00011551	T06G6.12.1	T06G6.12	protein_coding	protein_coding	WBGene00011551	0.4321	405				TRUE	3.41351	0.0352326	0.058857	I	12722045	12722883	839	-	14.3159	23.4517	8.67232	0	0	4.30475	1.93147	2.88492	1.27125	0	0	0.36806
WBGene00015765	C14C11.1.1	C14C11.1	protein_coding	protein_coding	WBGene00015765	0.4156	1143				FALSE	3.4113	0.387219		V	5663591	5665264	1674	+	3.30366	3.25718	0	0	0	0	0.157934	0.141974	0	0	0	0
WBGene00019155	H04M03.11.1	H04M03.11	protein_coding	protein_coding	WBGene00019155	0.3586	753			GO:0016020; GO:0016021	FALSE	3.40993	0.387414		IV	5882707	5884529	1823	-	0	3.25718	3.46893	0	0	0	0	0.215507	0.273495	0	0	0
WBGene00011121	R07E5.17.1	R07E5.17	protein_coding	protein_coding	WBGene00011121	0.3445	1164			GO:0016020; GO:0016021	TRUE	3.40504	5.51051e-09	3.04901e-08	III	4402595	4404436	1842	-	197.119	273.603	405.865	47.4724	11.8609	22.5999	9.25338	11.7107	20.7003	1.27542	0.317022	0.672326
WBGene00001942	T23D8.6.1	his-68	protein_coding	protein_coding	WBGene00001942	0.4758	557		GO:0003677; GO:0046982	GO:0000786	TRUE	3.40146	1.21025e-06	4.95337e-06	I	9989061	9989617	557	+	126.723	436.202	101.816	30.9603	15.8146	16.1428	12.4315	39.0163	10.852	1.73826	0.883335	1.00357
WBGene00013101	Y51H4A.5.1	Y51H4A.5	protein_coding	protein_coding	WBGene00013101	0.4222	1054	GO:0006629			FALSE	3.398	0.389114		IV	16522529	16526132	3604	-	0	6.51436	0	0	0	0	0	0.307925	0	0	0	0
WBGene00022083	Y69A2AR.12.1	Y69A2AR.12	protein_coding	protein_coding	WBGene00022083	0.4545	1615			GO:0016020; GO:0016021	FALSE	3.398	0.389114		IV	2568614	2572056	3443	+	0	6.79943	0	0	0	0	0	0.209756	0	0	0	0
WBGene00022344	Y82E9BR.11.1	pals-40	protein_coding	protein_coding	WBGene00022344	0.4171	645				FALSE	3.398	0.389114		III	1376945	1378003	1059	-	0	6.51436	0	0	0	0	0	0.503183	0	0	0	0
WBGene00007640	C17D12.7.1	C17D12.7	protein_coding	protein_coding	WBGene00007640	0.4064	2490				TRUE	3.39301	1.01465e-07	4.81246e-07	I	11604027	11611314	7288	-	107.369	124.424	72.8475	15.4801	9.22517	4.30475	2.35616	2.48954	1.73686	0.19442	0.115265	0.0598651
WBGene00004298	W06D4.6.1	rad-54	protein_coding	protein_coding	WBGene00004298	0.3938	2664	GO:0007131; GO:0045003	GO:0000166; GO:0005524; GO:0008094; GO:0015616	GO:0005634	TRUE	3.39259	2.32513e-12	1.84836e-11	I	9065087	9070264	5178	+	282.463	219.534	227.215	35.0883	22.404	11.8381	5.79366	4.10564	5.06351	0.411901	0.261646	0.153876	1
WBGene00008226	C50B8.4.1	C50B8.4	protein_coding	protein_coding	WBGene00008226	0.3451	649			GO:0016020; GO:0016021	TRUE	3.39024	1.38522e-14	1.35866e-13	V	13572037	13573423	1387	+	766.45	1700.25	711.13	80.4967	106.748	116.228	64.5305	130.521	65.051	3.87881	5.11729	6.20144	5
WBGene00003001	R107.8.1	lin-12	protein_coding	protein_coding	WBGene00003001	0.4002	4847	GO:0001708; GO:0002119; GO:0007219; GO:0007275; GO:0018991; GO:0030154; GO:0030431; GO:0040025; GO:0040028; GO:0042659; GO:0042661; GO:0043054; GO:0045168; GO:0048337; GO:0048858; GO:0110011	GO:0004888; GO:0005112; GO:0005509; GO:0005515; GO:0061629; GO:0140297	GO:0005634; GO:0005886; GO:0016020; GO:0016021; GO:0016324; GO:0090575	TRUE	3.39012	4.15474e-26	8.85201e-25	III	9060096	9071760	11665	-	7921.64	6177.57	7709.69	760.591	452.033	866.331	89.3033	63.4977	94.4307	4.9073	2.90149	6.18922	5
WBGene00001998	F32A11.2.1; F32A11.2.2	hpr-17	protein_coding	protein_coding	WBGene00001998	0.4329	1668	GO:0000077; GO:0006281; GO:0006974; GO:0033314	GO:0000166; GO:0003682; GO:0005524	GO:0005634	TRUE	3.38964	1.09977e-10	7.30647e-10	II	13153461	13157093	3633	-	115.078	149.179	86.7232	11.3521	9.22517	12.9142	3.76982	4.45579	3.08666	0.212836	0.172069	0.268101	1
WBGene00001511	ZK177.6.1	fzy-1	protein_coding	protein_coding	WBGene00001511	0.425	1819	GO:0007049; GO:0008356; GO:0009949; GO:0031145; GO:0040038; GO:0051301; GO:0051321; GO:1904668; GO:1905786; GO:1990949	GO:0005515; GO:0010997; GO:0097027; GO:1990757	GO:0000793; GO:0005680; GO:0005694; GO:0005737	TRUE	3.38953	1.0039e-12	8.26784e-12	II	5501633	5503908	2276	+	817.106	1029.27	756.226	122.809	34.2649	90.3997	24.5455	28.191	24.6813	2.11136	0.586057	1.72092	5
WBGene00019199	H14E04.2a.1; H14E04.2b.1; H14E04.2c.1; H14E04.2d.1	H14E04.2	protein_coding	protein_coding	WBGene00019199	0.4654	1951	GO:0009116	GO:0003824		TRUE	3.38627	5.39199e-25	1.06461e-23	III	2376193	2384840	8648	+	1018.08	820.159	848.153	94.9447	56.6689	104.39	28.5135	20.9437	25.8087	1.52187	0.903672	1.8528	5
WBGene00000513	B0285.10.1	ckb-3	protein_coding	protein_coding	WBGene00000513	0.3948	1107	GO:0006629; GO:0006646; GO:0006656; GO:0006657; GO:0008654; GO:0016310	GO:0000166; GO:0004103; GO:0004305; GO:0005524; GO:0016301; GO:0016740	GO:0005737	TRUE	3.38444	7.30703e-11	4.95986e-10	III	4370885	4372820	1936	+	143.159	84.6867	137.023	12.3841	10.5431	11.8381	7.06636	3.81137	7.34842	0.34985	0.296307	0.370304	1
WBGene00011626	T08G5.7.1	T08G5.7	protein_coding	protein_coding	WBGene00011626	0.4641	711				FALSE	3.38252	0.320985		V	14044374	14045217	844	+	0.550611	2.28003	4.33616	0	0.658941	0	0.0423156	0.159766	0.362064	0	0.0288337	0
WBGene00050929	F58D12.5.1	F58D12.5	protein_coding	protein_coding	WBGene00050929	0.4641	711				FALSE	3.38252	0.320985		V	14048817	14049660	844	-	0.550611	2.28003	4.33616	0	0.658941	0	0.0423156	0.159766	0.362064	0	0.0288337	0
WBGene00021797	Y52E8A.4a.1; Y52E8A.4b.1	plep-1	protein_coding	protein_coding	WBGene00021797	0.4159	1226			GO:0016020; GO:0016021; GO:0110165	FALSE	3.3684	0.265353		II	4309725	4312215	2491	-	0	9.12011	3.46893	1.03201	0	0	0	0.370615	0.167979	0.0263244	0	0
WBGene00000468	F43G9.11.1	ces-1	protein_coding	protein_coding	WBGene00000468	0.4074	837	GO:0000122; GO:0006357; GO:0043069	GO:0000977; GO:0000981; GO:0005515; GO:0043565	GO:0005634	FALSE	3.36816	0.393389		I	8633925	8636044	2120	+	4.40489	1.95431	0	0	0	0	0.287564	0.116327	0	0	0	0
WBGene00003576	W01B6.9.1	ndc-80	protein_coding	protein_coding	WBGene00003576	0.3927	1910	GO:0007049; GO:0007079; GO:0030334; GO:0034501; GO:0035262; GO:0051301; GO:0051315; GO:0051321; GO:1901970; GO:1903394; GO:1905342; GO:1905561	GO:0005515; GO:0019904; GO:0044877	GO:0000775; GO:0000776; GO:0005634; GO:0005694; GO:0005737; GO:0005856; GO:0031262	TRUE	3.36659	4.66502e-13	3.97149e-12	IV	10086137	10088437	2301	+	907.407	933.508	823.87	116.617	34.2649	106.543	25.9594	24.35	25.6079	1.90938	0.558135	1.93159	5
WBGene00019562	K09C6.8a.1; K09C6.8b	K09C6.8	protein_coding	protein_coding	WBGene00019562	0.4728	1776	GO:0000727; GO:0007165; GO:0018105	GO:0004674	GO:0005634; GO:0005737	FALSE	3.36282	0.0642278		V	840236	843218	2983	-	15.8617	3.5127	14.6787	3.09603	0	0	0.488013	0.0985397	0.490676	0.0545163	0	0
WBGene00017710	F22E5.12.1	F22E5.12	protein_coding	protein_coding	WBGene00017710	0.3929	420	GO:0051260		GO:0016020; GO:0016021	TRUE	3.36133	0.000981371	0.00238277	II	2646328	2646843	516	-	70.4782	29.3146	32.9548	5.16004	0	7.53331	9.16919	3.47735	4.65821	0.38421	0	0.621101
WBGene00011175	R09E10.5.1	R09E10.5	protein_coding	protein_coding	WBGene00011175	0.4092	4372	GO:0007160; GO:0051013	GO:0008568	GO:0016020; GO:0016021	FALSE	3.35874	0.369972		IV	10296046	10302310	6265	-	0	164.813	0	2.06402	0	13.9904	0	1.87813	0	0.0147638	0	0.110809
WBGene00021911	Y55B1BR.1.1	Y55B1BR.1	protein_coding	protein_coding	WBGene00021911	0.4512	1733				FALSE	3.35348	0.387854		III	440267	443494	3228	+	0	12.3773	0	1.03201	0	0	0	0.355828	0	0.018623	0	0
WBGene00003955	W03D2.4.1	pcn-1	protein_coding	protein_coding	WBGene00003955	0.4874	991	GO:0006260; GO:0006272; GO:0006275; GO:0006298; GO:0019985; GO:0050790	GO:0003677; GO:0005515; GO:0030337; GO:0070182	GO:0005634; GO:0043626	TRUE	3.34944	9.19832e-17	1.07222e-15	IV	4047937	4049448	1512	-	2068.64	1910.01	1332.07	213.626	93.5696	213.085	114.061	96.0231	79.7998	6.74132	2.93754	7.44569	5
WBGene00014034	ZK643.2.1	ZK643.2	protein_coding	protein_coding	WBGene00014034	0.3538	865	GO:0006226; GO:0006231; GO:0009165	GO:0003824; GO:0004132; GO:0016787; GO:0046872		TRUE	3.34701	3.56613e-25	7.14582e-24	III	8956459	8957731	1273	+	838.58	1179.75	704.192	92.8808	77.755	96.8568	52.9729	67.9498	48.3308	3.35795	2.79663	3.87739	1
WBGene00010609	K07A1.2.1; K07A1.2.2; K07A1.2.3	dut-1	protein_coding	protein_coding	WBGene00010609	0.4513	1584	GO:0006226; GO:0046081	GO:0000287; GO:0004170; GO:0016787		TRUE	3.34579	1.85733e-16	2.1162e-15	I	9585317	9587206	1890	+	1329.17	1410.36	803.057	93.9128	84.3445	170.038	45.8513	44.3597	30.0982	1.85411	1.65663	3.71719	5
WBGene00018351	F42G2.2a.1; F42G2.2b.1; F42G2.2c.1	F42G2.2	protein_coding	protein_coding	WBGene00018351	0.3664	1800				TRUE	3.34004	1.6161e-06	6.47197e-06	II	2422207	2425837	3631	+	131.596	78.1723	55.5028	13.4161	3.95364	8.6095	3.9948	2.16368	1.83059	0.233088	0.0683358	0.165627
WBGene00009641	F42G4.2.1	F42G4.2	protein_coding	protein_coding	WBGene00009641	0.4282	1385				FALSE	3.33195	0.173843		II	13047941	13050807	2867	+	3.30366	0.651436	8.67232	1.03201	0	0	0.130338	0.0234334	0.371736	0.0233023	0	0
WBGene00013862	ZC302.2a.1; ZC302.2b	wdr-5.3	protein_coding	protein_coding	WBGene00013862	0.419	1623			GO:0044666	TRUE	3.32843	3.40253e-08	1.70803e-07	V	10737116	10739350	2235	+	321.557	244.94	268.842	37.1523	6.58941	38.7427	10.8259	7.51892	9.83396	0.715867	0.126314	0.826604
WBGene00010606	K06G5.2.1	cyp-13B2	protein_coding	protein_coding	WBGene00010606	0.3901	1769		GO:0004497; GO:0005506; GO:0016491; GO:0016705; GO:0020037; GO:0046872		TRUE	3.31814	0.181255	0.244287	X	14225573	14228768	3196	+	12.664	0	19.0791	3.09603	0	0	0.391174	0	0.640294	0.0547321	0	0
WBGene00018752	F53C3.8.1	F53C3.8	protein_coding	protein_coding	WBGene00018752	0.5024	828				TRUE	3.31548	0.00170119	0.00390746	II	3891424	3893574	2151	+	30.8342	22.1488	45.0961	3.09603	0	6.45712	2.03483	1.33271	3.23339	0.116934	0	0.270044
WBGene00019313	K02E7.9.1	btb-10	protein_coding	protein_coding	WBGene00019313	0.4072	997				FALSE	3.31476	0.335394		II	1059664	1060802	1139	-	2.20244	0.651436	3.46893	0	0	0	0.120708	0.032553	0.206561	0	0	0
WBGene00020011	R11G1.2.1	R11G1.2	protein_coding	protein_coding	WBGene00020011	0.4006	639				TRUE	3.31317	5.5034e-27	1.23551e-25	X	3652017	3655419	3403	+	595.21	639.711	483.915	51.6004	51.3974	69.9522	50.8973	49.8765	44.9591	2.52533	2.50244	3.79076	1
WBGene00016155	C27A12.4.1	C27A12.4	protein_coding	protein_coding	WBGene00016155	0.5103	1313				TRUE	3.31222	0.000109242	0.000320354	I	6035452	6037745	2294	+	281.362	116.607	256.701	36.1203	1.31788	27.9809	11.7092	4.4246	11.6068	0.860303	0.0312273	0.737942
WBGene00001891	K06C4.5.1	his-17	protein_coding	protein_coding	WBGene00001891	0.5234	535		GO:0003677; GO:0046982	GO:0000786	TRUE	3.30584	4.46085e-13	3.80569e-12	V	8897458	8897992	535	-	542.522	793.632	356.252	81.8458	47.1953	41.6031	55.4101	73.9059	39.5324	4.78418	2.74453	2.69276	1
WBGene00016088	C25B8.4a.1; C25B8.4b.1; C25B8.4c.1	clec-266	protein_coding	protein_coding	WBGene00016088	0.4385	747	GO:0044419	GO:0030246	GO:0009897; GO:0016020; GO:0016021	TRUE	3.30404	0.0539389	0.08553	X	6617393	6622915	5523	-	3.30367	44.9491	48.565	0	0	9.68568	0.241561	2.99668	3.85813	0	0	0.448808
WBGene00019950	R08C7.6.1	clec-175	protein_coding	protein_coding	WBGene00019950	0.4202	1761		GO:0030246		FALSE	3.30106	0.403102		IV	4422339	4426566	4228	+	6.05672	0	0	0	0	0	0.187933	0	0	0	0	0
WBGene00269429	H43I07.4.1	H43I07.4	protein_coding	protein_coding	WBGene00269429	0.4286	315				FALSE	3.30106	0.403102		V	4216147	4216461	315	+	6.05672	0	0	0	0	0	1.05064	0	0	0	0	0
WBGene00010172	F56H6.12.1	oac-36	protein_coding	protein_coding	WBGene00010172	0.4101	2007	GO:0009103; GO:0033692	GO:0016747	GO:0016020; GO:0016021	FALSE	3.29884	0.403427		I	12312335	12314895	2561	+	4.40489	0	1.73446	0	0	0	0.119926	0	0.0513059	0	0	0
WBGene00009488	F36G9.12.1	oac-20	protein_coding	protein_coding	WBGene00009488	0.4155	2171		GO:0016747	GO:0016020; GO:0016021	FALSE	3.29419	0.404105		V	15978714	15981666	2953	+	1.10122	0	5.20339	0	0	0	0.0277166	0	0.142291	0	0	0
WBGene00003155	C25D7.6.1	mcm-3	protein_coding	protein_coding	WBGene00003155	0.4402	2685	GO:0000727; GO:0006260; GO:0006270; GO:0006271; GO:0032508; GO:1902975	GO:0000166; GO:0003677; GO:0003678; GO:0003697; GO:0004386; GO:0005524; GO:0016787; GO:0016887; GO:0017116	GO:0000793; GO:0005634; GO:0042555; GO:0045120	TRUE	3.28656	4.51959e-19	6.06095e-18	V	15056719	15059599	2881	-	1999.27	1478.76	1359.82	227.042	105.431	162.504	40.6867	27.4389	30.0667	2.6444	1.22165	2.09578	5
WBGene00017638	F20D6.9.1	F20D6.9	protein_coding	protein_coding	WBGene00017638	0.423	357		GO:0003677; GO:0046982	GO:0000786; GO:0005634	FALSE	3.2848	0.339902		V	8177093	8177449	357	-	1.10122	3.25718	1.73446	0	0	0	0.168551	0.454556	0.288434	0	0	0
WBGene00004013	F38A6.1a.1; F38A6.1b.1; F38A6.1c.1	pha-4	protein_coding	protein_coding	WBGene00004013	0.4225	2097	GO:0006355; GO:0006357; GO:0008340; GO:0009653; GO:0016239; GO:0030154; GO:0045727; GO:0045944; GO:0048598; GO:0060465; GO:0060573; GO:0061771; GO:1903935	GO:0000978; GO:0000981; GO:0003677; GO:0003700; GO:0043565	GO:0005634	TRUE	3.28362	0.000106318	0.000312157	V	20752883	20760317	7435	+	1146.37	16333.5	1748.34	486.076	723.516	765.169	29.8712	388.055	49.4968	7.24887	10.7343	12.6353
WBGene00012137	T28F4.2.1	asic-2	protein_coding	protein_coding	WBGene00012137	0.3982	1665	GO:0006811; GO:0006814; GO:0035725	GO:0005272; GO:0015280	GO:0005887; GO:0016020; GO:0016021	TRUE	3.28311	0.00194279	0.00440396	I	7480108	7483392	3285	+	50.6562	80.1267	39.8927	1.03201	1.31788	15.0666	1.66243	2.3976	1.42242	0.0193836	0.0246255	0.313348
WBGene00000490	C27A7.4.1	che-11	protein_coding	protein_coding	WBGene00000490	0.3832	4314	GO:0006972; GO:0006979; GO:0008340; GO:0009408; GO:0035721; GO:0042073; GO:0043053; GO:0060271; GO:1905798; GO:1905801		GO:0005930; GO:0030991; GO:0036064; GO:0097730	TRUE	3.27957	1.62324e-05	5.5417e-05	V	12144295	12150689	6395	-	106.268	102.927	534.215	15.4801	26.3576	34.438	1.34601	1.18867	7.35165	0.112217	0.190086	0.276429
WBGene00003229	F53G12.5a.1; F53G12.5b.1; F53G12.5c.1; F53G12.5c.2	mex-3	protein_coding	protein_coding	WBGene00003229	0.457	1522	GO:0001708; GO:0009880; GO:0010468; GO:0010628; GO:0017148; GO:0048308; GO:0051148	GO:0003676; GO:0003723; GO:0003727; GO:0005515	GO:0005737; GO:0043186	TRUE	3.27599	2.71e-28	6.59704e-27	I	127297	134065	6769	+	2894.56	1744.54	2357.14	226.01	216.133	279.808	103.919	57.1059	91.9431	4.64385	4.41804	6.36607	1
WBGene00017181	F02E11.3.1	F02E11.3	protein_coding	protein_coding	WBGene00017181	0.4853	814				FALSE	3.27583	0.403521		II	3272349	3275023	2675	-	0	11.7259	0	0	0	1.07619	0	0.717685	0	0	0	0.0457814
WBGene00012228	W03H9.2a; W03H9.2b.1	W03H9.2	protein_coding	protein_coding	WBGene00012228	0.4674	706				TRUE	3.26968	6.82632e-11	4.65442e-10	II	14142949	14143874	926	-	132.147	156.996	180.384	19.6082	7.90729	20.4475	10.2277	11.0789	15.1685	0.868557	0.348455	1.00291	1
WBGene00001049	F33H2.1.1	dog-1	protein_coding	protein_coding	WBGene00001049	0.4363	3179	GO:0000003; GO:0000723; GO:0006139; GO:0006289; GO:0032508; GO:0043570; GO:0090329; GO:1990918	GO:0000166; GO:0003676; GO:0003677; GO:0003678; GO:0004386; GO:0005524; GO:0016787; GO:0016818; GO:0016887	GO:0005634	TRUE	3.25904	2.12138e-13	1.86764e-12	I	15017283	15023017	5735	-	723.503	725.7	565.435	90.8168	31.6292	87.1712	12.4358	11.3731	10.5595	0.893389	0.309542	0.949528	5
WBGene00008068	C43D7.5.1	sdz-6	protein_coding	protein_coding	WBGene00008068	0.427	459	GO:0007369			FALSE	3.25736	0.409505		V	19320624	19321203	580	+	0	2.60575	3.46893	0	0	0	0	0.282835	0.448675	0	0	0
WBGene00043992	F58A4.14a.1; F58A4.14b.1	bbs-4	protein_coding	protein_coding	WBGene00043992	0.3839	1161	GO:0007098; GO:0015031; GO:0030030; GO:0060271; GO:0061512	GO:0030674	GO:0000242; GO:0005737; GO:0005815; GO:0005856; GO:0005886; GO:0005929; GO:0016020; GO:0036064; GO:0042995; GO:0060170	TRUE	3.25488	0.0008231	0.00202979	III	9609568	9612191	2624	-	39.0934	97.7155	194.26	4.12804	27.6755	3.22856	1.83991	4.19319	9.93345	0.111193	0.74163	0.0962947
WBGene00008497	F01D5.7a.1; F01D5.7b.1	F01D5.7	protein_coding	protein_coding	WBGene00008497	0.4866	1022	GO:0002084	GO:0008474; GO:0016787	GO:0005886; GO:0010008	FALSE	3.24801	0.410884		II	14008666	14010583	1918	+	0	5.86293	0	0	0	0	0	0.28581	0	0	0	0
WBGene00011547	T06G6.5a.1	T06G6.5	protein_coding	protein_coding	WBGene00011547	0.4072	749				FALSE	3.24801	0.410884		I	12715648	12716583	936	+	0	5.86293	0	0	0	0	0	0.389984	0	0	0	0
WBGene00012726	Y39G8B.5.1	Y39G8B.5	protein_coding	protein_coding	WBGene00012726	0.4081	2181	GO:0006468; GO:0016310; GO:0018105; GO:0018107	GO:0004672; GO:0004674; GO:0005524; GO:0016301		FALSE	3.24801	0.410884		II	13987616	13991838	4223	-	0	5.86293	0	0	0	0	0	0.133928	0	0	0	0
WBGene00235267	Y77E11A.23.1	Y77E11A.23	protein_coding	protein_coding	WBGene00235267	0.3732	1053				FALSE	3.24801	0.410884		IV	1429041	1430367	1327	-	0	5.86293	0	0	0	0	0	0.277396	0	0	0	0
WBGene00044441	Y119C1B.11.1	Y119C1B.11	protein_coding	protein_coding	WBGene00044441	0.5583	240				FALSE	3.2465	0.302227		I	4552851	4553121	271	-	0	9.77155	1.73446	0	0	1.07619	0	2.02846	0.429045	0	0	0.155275
WBGene00195168	T13C5.9.1	T13C5.9	protein_coding	protein_coding	WBGene00195168	0.3997	698				TRUE	3.24585	0.00308293	0.00670753	X	6190252	6191210	959	+	91.952	121.819	270.576	1.03201	46.1259	4.30475	7.19832	8.69504	23.0136	0.0462373	2.05595	0.213559
WBGene00016340	C33C12.8.1	gba-2	protein_coding	protein_coding	WBGene00016340	0.4345	1579	GO:0006629; GO:0006665; GO:0006680	GO:0004348; GO:0016787		TRUE	3.24298	0.0597608	0.0936263	II	2182503	2186434	3932	-	12.664	9.77155	8.67232	0	0	3.22856	0.438244	0.308315	0.326064	0	0	0.0708031
WBGene00021913	Y55B1BR.3.1; Y55B1BR.3.2	cec-8	protein_coding	protein_coding	WBGene00021913	0.45	2228	GO:0010468; GO:0097240	GO:0003682; GO:0035064	GO:0000793; GO:0005637	TRUE	3.23704	5.38755e-11	3.71309e-10	III	429300	431750	2451	+	271.451	313.341	310.469	25.8002	15.8146	52.7332	6.65736	7.00673	8.2728	0.362137	0.220834	0.819585	1
WBGene00011350	T01H3.4.1	perm-1	protein_coding	protein_coding	WBGene00011350	0.4166	1714			GO:0016020; GO:0016021	FALSE	3.22793	0.0819946		II	7880812	7882767	1956	+	1.65183	7.1658	12.1412	1.03201	0	1.07619	0.05266	0.20829	0.420535	0.0188294	0	0.0217422
WBGene00012307	W06F12.3.1	W06F12.3	protein_coding	protein_coding	WBGene00012307	0.4573	1006	GO:0006468; GO:0007165; GO:0016310; GO:0018105	GO:0000166; GO:0004672; GO:0004674; GO:0005524; GO:0016301	GO:0005634; GO:0005737	TRUE	3.22469	0.0152281	0.027967	III	13735071	13736541	1471	+	9.36038	39.0862	12.1412	2.06402	0	4.30475	0.508418	1.9357	0.716497	0.0641624	0	0.148175
WBGene00005137	C13B7.3a.1; C13B7.3b; C13B7.3c; C13B7.3d	srd-60	protein_coding	protein_coding	WBGene00005137	0.4252	578			GO:0016020; GO:0016021	FALSE	3.22401	0.414433		V	2419081	2421583	2503	+	0.550611	5.08963	0	0	0	0	0.0520076	0.438325	0	0	0	0
WBGene00045511	F11A5.18.1	F11A5.18	protein_coding	protein_coding	WBGene00045511	0.3506	502				FALSE	3.22401	0.414433		V	16202809	16204862	2054	+	0.550611	5.21149	0	0	0	0	0.0599331	0.517216	0	0	0	0
WBGene00045292	T14C1.3.1	fbxa-179	protein_coding	protein_coding	WBGene00045292	0.39	1164				TRUE	3.21872	0.0032768	0.00707221	X	14411418	14412855	1438	-	25.8787	17.5888	27.7514	3.09603	0	4.30475	1.21483	0.752829	1.41541	0.0831796	0	0.128062
WBGene00194708	Y36E3A.2.1	Y36E3A.2	protein_coding	protein_coding	WBGene00194708	0.3498	606			GO:0016020; GO:0016021	TRUE	3.21765	2.11196e-13	1.8607e-12	V	15426166	15426970	805	+	186.657	261.226	152.633	21.6722	25.0398	18.2952	16.8305	21.4762	14.9529	1.11839	1.28552	1.04542	1
WBGene00003681	Y15E3A.1a.1; Y15E3A.1a.2; Y15E3A.1a.3; Y15E3A.1b.1	nhr-91	protein_coding	protein_coding	WBGene00003681	0.4441	1768	GO:0006355; GO:0006357; GO:0030154; GO:0030522; GO:0045944; GO:0048856	GO:0000978; GO:0003677; GO:0003700; GO:0004879; GO:0005515; GO:0008270; GO:0043565; GO:0046872	GO:0005634	TRUE	3.21236	1.27078e-34	4.51778e-33	X	15309374	15314899	5526	+	2421.03	1777.12	1812.51	198.146	249.08	202.323	74.8246	50.078	60.8623	3.50483	4.38309	3.96268	1
WBGene00020418	T10E9.8.1; T10E9.8.2	T10E9.8	protein_coding	protein_coding	WBGene00020418	0.3313	637			GO:0016020; GO:0016021	TRUE	3.21086	3.06402e-07	1.36814e-06	I	6539129	6541084	1956	-	169.038	157.648	149.164	14.4481	5.27153	31.2094	14.5	12.33	13.9019	0.709311	0.257466	1.69657
WBGene00194835	Y17G9B.11a.1; Y17G9B.11b.1	Y17G9B.11	protein_coding	protein_coding	WBGene00194835	0.3734	286				TRUE	3.21011	0.000242734	0.000667725	IV	4756605	4756942	338	+	22.0244	35.829	57.2373	3.09603	2.63576	6.45712	4.20054	6.23051	11.8605	0.337944	0.286223	0.780441
WBGene00014153	ZK930.3a.1; ZK930.3b.1	vab-23	protein_coding	protein_coding	WBGene00014153	0.4288	732	GO:0010172; GO:0040025; GO:0045666; GO:0048730; GO:0098609		GO:0005634; GO:0016607	TRUE	3.21001	2.13325e-08	1.09955e-07	II	11897365	11901210	3846	-	566.028	270.998	480.447	40.2483	19.7682	81.7903	42.2236	18.432	38.9392	1.71832	0.839621	3.86651
WBGene00022177	Y71H2AM.12.1	Y71H2AM.12	protein_coding	protein_coding	WBGene00022177	0.4058	993	GO:0007015; GO:0007163; GO:0008045; GO:0008360; GO:0030865; GO:0032956; GO:0043652	GO:0003924; GO:0005525; GO:0019901	GO:0005856; GO:0005886; GO:0005938; GO:0031410; GO:0042995; GO:0043005	FALSE	3.20803	0.188107		III	2731346	2734091	2746	-	0	0.651436	30.108	2.06402	0	1.07619	0	0.0326841	1.80004	0.0650024	0	0.0375288
WBGene00008086	C44C10.5.1	C44C10.5	protein_coding	protein_coding	WBGene00008086	0.4237	918	GO:0007062	GO:0003677	GO:0005634; GO:0008278	FALSE	3.20661	0.0687625		X	11691109	11692456	1348	+	3.30366	8.46867	8.67232	1.03201	0	1.07619	0.196643	0.459607	0.560844	0.0351565	0	0.0405948
WBGene00001941	T23D8.5.1	his-67	protein_coding	protein_coding	WBGene00001941	0.4774	486	GO:0045944	GO:0003677; GO:0046982		TRUE	3.20351	0.0219214	0.0386719	I	9988341	9988826	486	-	20.6628	41.5145	7.06066	1.05732	0	6.93497	2.32315	4.25576	0.862498	0.0680357	0	0.494122
WBGene00011803	T16G12.1.1	T16G12.1	protein_coding	protein_coding	WBGene00011803	0.3903	5847	GO:0006508; GO:0009792; GO:0030154; GO:0043171; GO:0046662; GO:0048477; GO:1903538	GO:0004177; GO:0008233; GO:0008237; GO:0008270; GO:0016787; GO:0042277; GO:0046872; GO:0070006	GO:0005737	TRUE	3.20215	0.175442	0.237561	III	10040191	10049857	9667	-	0	24.1031	26.017	0	0	5.38094	0	0.205378	0.264163	0	0	0.0318677
WBGene00003222	Y2H9A.1.1	mes-4	protein_coding	protein_coding	WBGene00003222	0.4207	3121	GO:0006325; GO:0006355; GO:0010452; GO:0016571; GO:0018992; GO:0031507; GO:0032259; GO:0040029	GO:0008168; GO:0016740; GO:0042054; GO:0046872; GO:0046975	GO:0000228; GO:0000785; GO:0000805; GO:0005634; GO:0005694; GO:0030849	TRUE	3.20172	1.42566e-28	3.54166e-27	V	13433050	13437545	4496	-	784.07	631.242	757.961	77.4007	94.8875	64.5712	13.7273	10.0766	14.4179	0.775561	0.945885	0.716425	1
WBGene00003176	F37C12.12.1	mec-14	protein_coding	protein_coding	WBGene00003176	0.3875	1569	GO:0007638; GO:0050976; GO:1905789; GO:1905792	GO:0016491; GO:0047834		FALSE	3.20143	0.357843		III	7190207	7192992	2786	-	1.10122	1.30287	3.46893	0	0	0	0.0383511	0.0413707	0.131257	0	0	0
WBGene00014131	ZK892.7.1	sdz-38	protein_coding	protein_coding	WBGene00014131	0.3851	740				FALSE	3.20143	0.357843		II	9980886	9981752	867	-	1.10122	1.30287	3.46893	0	0	0	0.0813146	0.087717	0.2783	0	0	0
WBGene00004035	Y73F8A.1.1	pkd-2	protein_coding	protein_coding	WBGene00004035	0.4507	2210	GO:0006811; GO:0006816; GO:0007610; GO:0007617; GO:0023041; GO:0034606; GO:0034608; GO:0050982; GO:0060179; GO:0070588	GO:0005262; GO:0005509	GO:0005783; GO:0005789; GO:0005886; GO:0005929; GO:0016020; GO:0016021; GO:0030424; GO:0030425; GO:0031090; GO:0042995; GO:0043025; GO:0043204; GO:0048471; GO:0060170; GO:0071683; GO:0097730	FALSE	3.19678	0.29149		IV	15227883	15234973	7091	-	4.40489	0	6.93786	0	0	1.07619	0.10891	0	0.186373	0	0	0.0168625
WBGene00007710	C25A1.9a.1; C25A1.9b.1	rsa-1	protein_coding	protein_coding	WBGene00007710	0.3942	1385	GO:0007049; GO:0007052; GO:0009792; GO:0033365; GO:0090307	GO:0005509; GO:0005515; GO:0008048; GO:0051721	GO:0005737; GO:0005813; GO:0005815; GO:0005856	TRUE	3.1961	1.17577e-31	3.41819e-30	I	10185780	10187550	1771	+	1735.53	2374.48	1536.73	215.69	201.636	199.095	68.471	85.4148	65.8716	4.87018	4.52941	4.97779	1
WBGene00001949	M05B5.5a.1; M05B5.5b	hlh-2	protein_coding	protein_coding	WBGene00001949	0.4212	1390	GO:0000003; GO:0001708; GO:0002119; GO:0006357; GO:0007399; GO:0008340; GO:0008406; GO:0009792; GO:0010171; GO:0010628; GO:0014018; GO:0030718; GO:0032094; GO:0034769; GO:0035262; GO:0040025; GO:0042743; GO:0043068; GO:0045138; GO:0045944; GO:0046034; GO:0048665; GO:0048666; GO:1903356; GO:1990636; GO:2000114	GO:0000977; GO:0000978; GO:0000981; GO:0003677; GO:0005515; GO:0042803; GO:0043425; GO:0043565; GO:0046982; GO:0046983	GO:0005634; GO:0005667; GO:0005737; GO:0090575	TRUE	3.19376	4.61587e-22	7.63414e-21	I	7190834	7193924	3091	-	3153.9	1614.91	2268.68	224.978	282.027	262.59	123.982	57.8825	96.8964	5.06163	6.31246	6.54167	1
WBGene00018608	F48E3.9.1	F48E3.9	protein_coding	protein_coding	WBGene00018608	0.3983	1981				TRUE	3.19368	8.71921e-05	0.000260738	X	7481326	7485038	3713	+	105.167	171.979	322.61	27.8642	2.63576	34.438	2.90081	4.32519	9.66814	0.439873	0.0413947	0.601976
WBGene00018229	F40C5.2.1	F40C5.2	protein_coding	protein_coding	WBGene00018229	0.52	150				FALSE	3.19337	0.165088		V	3571196	3571391	196	+	1.92714	4.23434	5.20339	0	1.31788	0	0.702016	1.4064	2.05942	0	0.273343	0
WBGene00020754	T24A6.17.1	T24A6.17	protein_coding	protein_coding	WBGene00020754	0.52	150				FALSE	3.19337	0.165088		V	3564240	3564435	196	-	1.92714	4.23434	5.20339	0	1.31788	0	0.702016	1.4064	2.05942	0	0.273343	0
WBGene00003990	F35C8.6.1; F35C8.6.2	pfn-2	protein_coding	protein_coding	WBGene00003990	0.4301	840	GO:0042989; GO:0071689	GO:0003779; GO:0003785	GO:0005737; GO:0005856; GO:0005938	TRUE	3.19104	4.20624e-13	3.60624e-12	X	5353033	5354144	1112	-	3711.12	5034.95	1619.99	323.019	375.596	436.932	241.264	298.45	114.426	12.0186	13.9029	18.0012	1
WBGene00021098	W08F4.9.1	fbxb-14	protein_coding	protein_coding	WBGene00021098	0.4455	752				TRUE	3.18879	0.007398	0.0146834	II	582111	582862	752	-	24.9101	10.5702	34.5939	2.91734	0	4.11309	1.81002	0.700292	2.73106	0.121321	0	0.189398
WBGene00001921	B0035.7.1	his-47	protein_coding	protein_coding	WBGene00001921	0.4608	586		GO:0003677; GO:0046982	GO:0000786	TRUE	3.18615	2.03373e-05	6.8353e-05	IV	11323885	11324470	586	-	67.8044	109.148	43.7244	5.7584	4.44852	13.947	6.32246	9.27967	4.42972	0.307305	0.236179	0.824152
WBGene00016900	C53C11.2.1	C53C11.2	protein_coding	protein_coding	WBGene00016900	0.4327	342			GO:0016020; GO:0016021	TRUE	3.18512	0.00700453	0.0139918	X	17337279	17338632	1354	+	51.7574	50.1606	6.93786	2.06402	9.22517	1.07619	8.26936	7.30719	1.20434	0.188735	0.839212	0.108965
WBGene00022101	Y69A2AR.32a.1; Y69A2AR.32b.1; Y69A2AR.32b.2; Y69A2AR.32b.3; Y69A2AR.32c.1	Y69A2AR.32	protein_coding	protein_coding	WBGene00022101	0.4844	844	GO:0048024	GO:0003676; GO:0003723; GO:0003729	GO:0005634	TRUE	3.18507	3.85535e-18	4.9106e-17	IV	2610408	2612435	2028	+	317.152	310.084	251.497	34.0563	39.5365	23.6761	20.5329	18.3042	17.6905	1.26188	1.4574	0.97139	1
WBGene00012268	W04G5.8.1	W04G5.8	protein_coding	protein_coding	WBGene00012268	0.4247	1281				TRUE	3.1803	2.11257e-06	8.27755e-06	I	11649982	11651912	1931	+	58.9154	186.962	128.301	10.3201	9.22517	21.5237	2.51307	7.27141	5.94606	0.251941	0.224052	0.581827
WBGene00001899	ZK131.2.1	his-25	protein_coding	protein_coding	WBGene00001899	0.4778	609		GO:0003677; GO:0046982	GO:0000786	TRUE	3.17929	1.31066e-12	1.06639e-11	II	13824686	13825294	609	-	5188.6	5629.52	2040.63	330.564	545.077	544.904	465.541	460.54	198.928	16.9747	27.8461	30.9833	1
WBGene00018471	F45E4.6.1	F45E4.6	protein_coding	protein_coding	WBGene00018471	0.3628	1232			GO:0016020; GO:0016021	TRUE	3.17906	0.0563996	0.089016	IV	7630718	7632672	1955	-	7.70855	72.9609	36.4237	0	13.1788	0	0.341891	2.95048	1.75519	0	0.332804	0
WBGene00010107	F55C9.11.1	F55C9.11	protein_coding	protein_coding	WBGene00010107	0.3611	252				FALSE	3.17811	0.421272		V	19307242	19307583	342	-	0	0.651436	5.20339	0	0	0	0	0.128791	1.22584	0	0	0
WBGene00006063	F08C6.4a.1; F08C6.4b.1	sto-1	protein_coding	protein_coding	WBGene00006063	0.4461	1360			GO:0005886; GO:0016020; GO:0016021; GO:0110165	TRUE	3.17637	7.41715e-12	5.6234e-11	X	7562831	7564805	1975	+	3015.14	4675.36	2957.26	450.988	173.961	552.084	121.142	171.273	129.092	10.3703	3.97956	14.057	5
WBGene00009909	F49H6.8.1	F49H6.8	protein_coding	protein_coding	WBGene00009909	0.5272	294				FALSE	3.17486	0.421758		V	17022370	17022663	294	-	1.65183	3.90862	0	0	0	0	0.307004	0.662353	0	0	0	0
WBGene00011963	T23G5.3.1	T23G5.3	protein_coding	protein_coding	WBGene00011963	0.403	789	GO:0051260			TRUE	3.17247	1.39877e-07	6.50452e-07	III	9229235	9231210	1976	-	182.803	393.468	204.667	13.4161	23.7219	49.5046	12.6599	24.8454	15.4	0.531759	0.935395	2.17267
WBGene00020777	T24E12.10.1	T24E12.10	protein_coding	protein_coding	WBGene00020777	0.4328	4161				FALSE	3.16581	0.24804		II	3765087	3773191	8105	-	14.3159	0	5.20339	0	0	2.15237	0.187995	0	0.07424	0	0	0.0179121
WBGene00013175	Y53F4B.36.1	Y53F4B.36	protein_coding	protein_coding	WBGene00013175	0.4158	938				FALSE	3.16561	0.246848		II	15175943	15177271	1329	+	0	10.423	8.67232	2.06402	0	0	0	0.553608	0.548885	0.0688138	0	0
WBGene00008007	C38D4.7.1	C38D4.7	protein_coding	protein_coding	WBGene00008007	0.4677	943				FALSE	3.1615	0.423762		III	4810031	4811162	1132	-	3.85428	0	1.73446	0	0	0	0.223335	0	0.109195	0	0	0
WBGene00017987	F32D1.8a.1; F32D1.8b	F32D1.8	protein_coding	protein_coding	WBGene00017987	0.4842	330				FALSE	3.1615	0.423762		V	4376619	4377722	1104	-	3.85428	0	1.73446	0	0	0	0.637231	0	0.311561	0	0	0
WBGene00021809	Y53G8AR.1.1	Y53G8AR.1	protein_coding	protein_coding	WBGene00021809	0.4493	819				FALSE	3.1615	0.423762		III	3333036	3333957	922	+	3.85428	0	1.73446	0	0	0	0.257149	0	0.125728	0	0	0
WBGene00017120	E04A4.6.1	tctn-1	protein_coding	protein_coding	WBGene00017120	0.3942	1423	GO:0030030; GO:0060271		GO:0016020; GO:0016021; GO:0035869	TRUE	3.16104	5.92084e-07	2.53707e-06	IV	4745825	4747832	2008	-	154.722	183.054	506.463	26.8322	18.4503	48.4284	5.94117	6.40895	21.1297	0.58968	0.403388	1.17848
WBGene00045239	Y49E10.29.1	Y49E10.29	protein_coding	protein_coding	WBGene00045239	0.502	1960			GO:0016020; GO:0016021	TRUE	3.15833	0.0194707	0.0347889	III	12469169	12472541	3373	+	12.1134	39.0862	8.67232	4.12804	2.63576	0	0.337704	0.993529	0.262681	0.0658646	0.0418382	0
WBGene00022455	Y110A7A.4.1	tyms-1	protein_coding	protein_coding	WBGene00022455	0.4236	1027	GO:0006231; GO:0009165; GO:0032259	GO:0003824; GO:0004799; GO:0008168; GO:0016740	GO:0005739; GO:0005829	TRUE	3.1579	6.06442e-22	9.94844e-21	I	5138256	5139382	1127	+	689.915	654.042	730.209	106.297	60.6226	64.5712	36.7072	31.7284	42.211	3.23679	1.83648	2.17718	1
WBGene00004952	Y34D9A.4.1	spd-1	protein_coding	protein_coding	WBGene00004952	0.5081	1791	GO:0000226; GO:0007052; GO:0008406; GO:0009792; GO:0040014; GO:0040017; GO:0051256; GO:0061073; GO:1903562	GO:0008017	GO:0005634; GO:0005737; GO:0005819; GO:0005874; GO:1990023	TRUE	3.15692	2.52623e-20	3.66333e-19	I	1030629	1033436	2808	-	482.335	421.479	362.503	41.2804	61.9404	39.8189	14.7156	11.7245	12.0161	0.720797	1.07597	0.769874	1
WBGene00008524	F02D10.3.1	F02D10.3	protein_coding	protein_coding	WBGene00008524	0.4242	1035				FALSE	3.15672	0.424481		X	13456889	13462619	5731	-	2.20244	0	3.46893	0	0	0	0.116276	0	0.198978	0	0	0
WBGene00001165	F56A11.3.1	efn-4	protein_coding	protein_coding	WBGene00001165	0.4512	1281	GO:0007399; GO:0007411; GO:0009792; GO:0016331; GO:0030155; GO:0042074; GO:0045138; GO:0048013; GO:1902667	GO:0005515; GO:0046875	GO:0005886; GO:0016020; GO:0030424; GO:0031225; GO:0043025	TRUE	3.1554	0.0132065	0.0245972	IV	559234	568076	8843	+	22.0244	159.602	60.7062	23.7362	0	3.22856	0.939466	6.2073	2.81341	0.579465	0	0.0872741
WBGene00000953	F58G6.6a.1; F58G6.6b.1	del-2	protein_coding	protein_coding	WBGene00000953	0.357	1889				TRUE	3.15539	0.00152112	0.00353335	IV	9636980	9642003	5024	-	51.2068	25.406	246.294	10.3201	3.95364	21.5237	1.48123	0.670066	7.74053	0.170851	0.0651162	0.394559
WBGene00012936	Y47D3A.29a.1; Y47D3A.29b.1	pola-1	protein_coding	protein_coding	WBGene00012936	0.4606	4580	GO:0006260; GO:0006272; GO:0006273; GO:0071897; GO:1902975	GO:0000166; GO:0003676; GO:0003677; GO:0003682; GO:0003688; GO:0003697; GO:0003887; GO:0016740; GO:0016779; GO:0017076; GO:0019103; GO:0046872; GO:0051536; GO:0051539	GO:0005634; GO:0005658; GO:0043625	TRUE	3.15231	7.67087e-55	1.17714e-52	III	11142448	11154287	11840	+	1868.22	1795.36	1668.55	205.37	189.775	204.476	22.2889	19.5299	21.6284	1.40228	1.28913	1.54597	1
WBGene00012925	Y47D3A.11.1	wht-8	protein_coding	protein_coding	WBGene00012925	0.4597	1860	GO:0055085	GO:0000166; GO:0005524; GO:0140359	GO:0005886; GO:0016020; GO:0016021	FALSE	3.15175	0.425229		III	11218797	11222666	3870	+	0.550611	0	5.20339	0	0	0	0.0161755	0	0.166082	0	0	0
WBGene00001437	F26A1.2.1	fkh-5	protein_coding	protein_coding	WBGene00001437	0.3817	1386	GO:0006355	GO:0000977; GO:0000987; GO:0003677; GO:0003700; GO:0043565	GO:0005634	FALSE	3.1496	0.123952		III	4844662	4846546	1885	+	2.75305	1.95431	34.6893	0	0	4.30475	0.108537	0.0702496	1.48587	0	0	0.10755
WBGene00018806	F54D10.5.1; F54D10.5.2	F54D10.5	protein_coding	protein_coding	WBGene00018806	0.4163	954				TRUE	3.14912	0.00276347	0.00607463	II	3807096	3808223	1128	-	27.5305	45.6006	22.548	4.12804	0	6.45712	1.57686	2.38142	1.40317	0.135319	0	0.234378
WBGene00013711	Y106G6G.2.1	Y106G6G.2	protein_coding	protein_coding	WBGene00013711	0.3942	5185	GO:0032012; GO:0050790	GO:0005085		TRUE	3.14802	2.25392e-12	1.79529e-11	I	10300573	10327870	27298	-	3506.29	3036.35	3796.74	215.69	660.259	291.647	36.9509	29.1753	43.4722	1.30091	3.96176	1.94775	1
WBGene00017134	EEED8.3.1	EEED8.3	protein_coding	protein_coding	WBGene00017134	0.3746	969				FALSE	3.14794	0.208419		II	5414207	5415580	1374	+	0.550611	5.21149	5.20339	0	0	1.07619	0.0310489	0.267949	0.318795	0	0	0.0384583
WBGene00016857	C50H11.11.1	srt-16	protein_coding	protein_coding	WBGene00016857	0.4062	906			GO:0016020; GO:0016021	FALSE	3.14466	0.38543		V	3063160	3064518	1359	-	0.563721	3.30273	1.84583	0	0	0	0.0339986	0.181618	0.120952	0	0	0
WBGene00018908	F56A3.1.1	fncm-1	protein_coding	protein_coding	WBGene00018908	0.3675	2479				TRUE	3.1431	0.000800647	0.00198006	I	5190142	5195243	5102	+	152.519	112.699	121.412	16.5121	0	26.9047	3.36181	2.26493	2.90761	0.208301	0	0.375817
WBGene00044257	Y45F10D.16.1	Y45F10D.16	protein_coding	protein_coding	WBGene00044257	0.3866	688			GO:0016020; GO:0016021	FALSE	3.13995	0.0457937		IV	13776415	13777149	735	+	4.40489	9.12011	17.3446	0	1.31788	2.15237	0.349842	0.660428	1.49667	0	0.0595952	0.108332
WBGene00016826	C50E10.2a.1; C50E10.2b.1; C50E10.2c.1; C50E10.2d	C50E10.2	protein_coding	protein_coding	WBGene00016826	0.4234	1211				FALSE	3.13972	0.321317		II	12305543	12309714	4172	-	9.91099	0.651436	0	1.03201	0	0	0.447197	0.0268004	0	0.0266504	0	0
WBGene00020318	T07F8.1.1	T07F8.1	protein_coding	protein_coding	WBGene00020318	0.4034	2469				TRUE	3.13145	0.0074449	0.0147668	II	7149248	7151760	2513	+	19.822	15.6345	31.2203	5.16004	0	2.15237	0.438684	0.315483	0.750699	0.0653578	0	0.0301872
WBGene00001869	R12B2.4.1	him-10	protein_coding	protein_coding	WBGene00001869	0.4048	1596	GO:0000003; GO:0000070; GO:0007049; GO:0007052; GO:0008608; GO:0045132; GO:0051301; GO:0051315; GO:0051321; GO:0051383	GO:0005198; GO:0005515; GO:0044877	GO:0000775; GO:0000776; GO:0005634; GO:0005694; GO:0031262	TRUE	3.13128	1.73527e-09	1.01421e-08	III	5803260	5805112	1853	+	354.043	463.171	296.593	71.2086	19.7682	35.5142	12.1213	14.4585	11.0326	1.39529	0.385352	0.770539
WBGene00044347	Y71G12B.30a.1; Y71G12B.30b.1; Y71G12B.30c.1	Y71G12B.30	protein_coding	protein_coding	WBGene00044347	0.4853	801	GO:0006470	GO:0004722; GO:0016787	GO:0005634; GO:0005737	FALSE	3.12734	0.0985723		I	1818581	1822948	4368	-	5.50611	3.90862	19.0791	3.09603	0	0	0.375283	0.242899	1.41285	0.12077	0	0
WBGene00007768	C27C7.5a.1; C27C7.5b.1	C27C7.5	protein_coding	protein_coding	WBGene00007768	0.3968	859		GO:0016936; GO:0030246		FALSE	3.12366	0.308521		I	11423993	11426054	2062	-	5.50611	0	5.20339	1.03201	0	0	0.350045	0	0.35941	0.0375494	0	0
WBGene00021304	Y32G9A.6a.1; Y32G9A.6b.1; Y32G9A.6c.1; Y32G9A.6d.1; Y32G9A.6e.1; Y32G9A.6f.1; Y32G9A.6g; Y32G9A.6h	nphp-2	protein_coding	protein_coding	WBGene00021304	0.4538	1399	GO:1904108	GO:0003674	GO:0097543	TRUE	3.12304	0.00317247	0.00687519	V	1895797	1906560	10764	+	12.1134	97.0643	46.8305	2.06402	3.95364	11.8381	0.473124	3.45665	1.98728	0.0461382	0.0879231	0.293014
WBGene00022682	ZK185.2.1	ZK185.2	protein_coding	protein_coding	WBGene00022682	0.4349	1605	GO:0006812; GO:0098655	GO:0008324	GO:0005886; GO:0016020; GO:0016021	TRUE	3.11985	7.66776e-07	3.23439e-06	IV	4536553	4541771	5219	+	181.151	86.6411	171.712	7.22406	27.6755	16.1428	6.16724	2.68944	6.35148	0.140757	0.536468	0.348281
WBGene00000386	K06A5.7.1; K06A5.7.2	cdc-25.1	protein_coding	protein_coding	WBGene00000386	0.4229	2298	GO:0000086; GO:0000212; GO:0006470; GO:0007049; GO:0010971; GO:0035335; GO:0045931; GO:0051301; GO:0051321; GO:0110032; GO:1902751	GO:0004721; GO:0004725; GO:0005515; GO:0016787	GO:0005634; GO:0005737	TRUE	3.11617	1.38259e-40	7.1022e-39	I	6469386	6471995	2610	-	1353.4	1596.67	1463.89	160.993	195.046	153.895	32.1812	34.6162	37.8187	2.1909	2.64065	2.31899	1
WBGene00015515	C06A8.5.1	spdl-1	protein_coding	protein_coding	WBGene00015515	0.4213	1602	GO:0000070; GO:0007049; GO:0007059; GO:0007079; GO:0007094; GO:0008608; GO:0009792; GO:0010696; GO:0034501; GO:0051301; GO:0090268; GO:1901970; GO:1902423; GO:1905342; GO:1905561; GO:1905824	GO:0005515	GO:0000775; GO:0000776; GO:0000922; GO:0005694; GO:0005737; GO:0005856; GO:0005874	TRUE	3.11078	1.17895e-10	7.80576e-10	II	7781566	7783354	1789	+	409.104	424.085	277.514	61.9205	19.7682	46.276	13.9539	13.1888	10.2842	1.20875	0.383909	1.00027	1
WBGene00017536	F17A9.4.1	F17A9.4	protein_coding	protein_coding	WBGene00017536	0.4148	1608		GO:0003824; GO:0010181; GO:0016491		TRUE	3.10671	1.23233e-41	6.7907e-40	V	6108964	6110722	1759	-	7381.49	10423.6	9216.94	971.12	1101.75	1064.35	250.832	322.958	340.291	18.8865	21.3167	22.9205	1
WBGene00044634	C29E4.14.1	C29E4.14	protein_coding	protein_coding	WBGene00044634	0.3481	451		GO:0005509		FALSE	3.10455	0.199359		III	7920123	7921059	937	+	2.75305	5.86293	1.73446	0	0	1.07619	0.333552	0.647667	0.228317	0	0	0.0826298
WBGene00219278	R09A8.9.1	R09A8.9	protein_coding	protein_coding	WBGene00219278	0.4888	356				TRUE	3.10237	0.00504492	0.0104119	X	12604710	12605171	462	+	19.2714	23.4517	13.8757	4.12804	1.31788	1.07619	2.95793	3.282	2.31395	0.362625	0.115173	0.10468
WBGene00007719	C25D7.9.1	C25D7.9	protein_coding	protein_coding	WBGene00007719	0.5574	183				FALSE	3.09803	0.433361		V	15065135	15065317	183	+	3.30366	1.95431	0	0	0	0	0.986439	0.532054	0	0	0	0
WBGene00017894	F28B12.1a.1; F28B12.1b.1; F28B12.1b.2; F28B12.1c.1; F28B12.1d.1; F28B12.1d.2	F28B12.1	protein_coding	protein_coding	WBGene00017894	0.3481	638				TRUE	3.08714	2.66849e-10	1.70984e-09	II	5942927	5943995	1069	+	556.117	494.44	496.056	67.0807	23.7219	90.3996	47.6066	38.5925	46.1377	3.28653	1.15624	4.90419	1
WBGene00001875	T10C6.14.1	his-1	protein_coding	protein_coding	WBGene00001875	0.464	528	GO:0006334	GO:0003677; GO:0046982	GO:0000786; GO:0005634; GO:0005694	TRUE	3.08137	5.21174e-06	1.91984e-05	V	16042486	16043013	528	+	236.398	279.73	67.6531	14.4481	36.9704	18.3194	24.4644	26.3948	7.60682	0.855741	2.17843	1.20144
WBGene00000023	Y53C10A.9.1	abt-5	protein_coding	protein_coding	WBGene00000023	0.401	4805	GO:0006869; GO:0055085	GO:0000166; GO:0005319; GO:0005524; GO:0042626; GO:0140359	GO:0016020; GO:0016021; GO:0043231	FALSE	3.08055	0.436026		I	12011195	12018668	7474	+	0	5.21149	0	0	0	0	0	0.0540359	0	0	0	0
WBGene00000752	C34F6.3.1	col-179	protein_coding	protein_coding	WBGene00000752	0.5082	972	GO:0030198; GO:0045087; GO:0048856; GO:0050829	GO:0005201; GO:0042302	GO:0005615; GO:0016020; GO:0016021; GO:0031012	FALSE	3.08055	0.436026		X	11201465	11202488	1024	+	0	5.21149	0	0	0	0	0	0.267122	0	0	0	0
WBGene00005081	K10B4.5.1	srd-3	protein_coding	protein_coding	WBGene00005081	0.4145	1035			GO:0016020; GO:0016021	FALSE	3.08055	0.436026		II	126938	128706	1769	-	0	5.21149	0	0	0	0	0	0.250862	0	0	0	0
WBGene00012065	T26H2.3.1	fbxb-2	protein_coding	protein_coding	WBGene00012065	0.3843	1158				FALSE	3.08055	0.436026		V	19236091	19237298	1208	-	0	5.21149	0	0	0	0	0	0.224216	0	0	0	0
WBGene00013590	Y81G3A.1.1	Y81G3A.1	protein_coding	protein_coding	WBGene00013590	0.4441	975				FALSE	3.08055	0.436026		II	13082413	13083828	1416	-	0	5.21149	0	0	0	0	0	0.2663	0	0	0	0
WBGene00013933	ZK39.8.1	clec-99	protein_coding	protein_coding	WBGene00013933	0.5014	706		GO:0030246		FALSE	3.08055	0.436026		I	11156745	11158831	2087	-	0	5.21149	0	0	0	0	0	0.367765	0	0	0	0
WBGene00014179	ZK1010.5.1	ZK1010.5	protein_coding	protein_coding	WBGene00014179	0.4834	2410				FALSE	3.08055	0.436026		III	12984493	12987542	3050	-	0	5.21149	0	0	0	0	0	0.107735	0	0	0	0
WBGene00015628	C09B9.3.1; C09B9.3.2	best-6	protein_coding	protein_coding	WBGene00015628	0.367	1396	GO:0008150; GO:0015698	GO:0003674; GO:0005254	GO:0005575; GO:0016020; GO:0016021	FALSE	3.08055	0.436026		IV	5026523	5029078	2556	-	0	5.21149	0	0	0	0	0	0.18599	0	0	0	0
WBGene00021454	Y39F10A.3.1	Y39F10A.3	protein_coding	protein_coding	WBGene00021454	0.4065	930				FALSE	3.08055	0.436026		II	781884	783001	1118	-	0	5.21149	0	0	0	0	0	0.279185	0	0	0	0
WBGene00022713	ZK355.3.1	ZK355.3	protein_coding	protein_coding	WBGene00022713	0.4216	574				FALSE	3.08055	0.436026		II	2927017	2927633	617	-	0	5.21149	0	0	0	0	0	0.452339	0	0	0	0
WBGene00014178	ZK1010.4a.1; ZK1010.4b.1	ZK1010.4	protein_coding	protein_coding	WBGene00014178	0.4516	606				TRUE	3.08015	2.42425e-13	2.11586e-12	III	12981070	12984423	3354	+	1084.7	683.357	917.531	56.7605	141.013	120.532	97.725	56.1346	89.813	2.92671	7.23357	6.88175	1
WBGene00010051	F54D5.5a.1; F54D5.5b.1	F54D5.5	protein_coding	protein_coding	WBGene00010051	0.4436	1528				TRUE	3.07894	1.52606e-05	5.23648e-05	II	11564385	11567020	2636	-	108.47	315.296	320.876	57.7925	15.8146	13.9904	3.87894	10.2804	12.467	1.1828	0.322001	0.317054
WBGene00016971	C56E6.3a.1; C56E6.3b.1	toe-2	protein_coding	protein_coding	WBGene00016971	0.3952	2252	GO:0009786; GO:0016310; GO:0043065	GO:0005515; GO:0016301		TRUE	3.07747	1.98433e-25	4.02948e-24	II	6517188	6519845	2658	-	480.683	595.33	450.328	58.8245	55.351	66.7236	11.6632	13.1705	11.8716	0.816873	0.764681	1.02597	1
WBGene00015291	C01B12.8.1	C01B12.8	protein_coding	protein_coding	WBGene00015291	0.3829	632				TRUE	3.07101	3.39265e-13	2.92942e-12	II	24666	25446	781	+	180.6	269.043	163.04	24.7682	22.404	25.8285	15.6145	21.2089	15.3153	1.22558	1.10289	1.41517	1
WBGene00000712	F41F3.4.1	col-139	protein_coding	protein_coding	WBGene00000712	0.5569	1029		GO:0042302	GO:0016020; GO:0016021	TRUE	3.06946	0.00168593	0.00387754	V	4652863	4654007	1145	-	78.7373	42.3434	50.2994	7.22406	0	12.9142	4.1811	2.05014	2.902	0.219549	0	0.43459
WBGene00001922	B0035.8.1	his-48	protein_coding	protein_coding	WBGene00001922	0.4841	504	GO:0006334; GO:0045087	GO:0003677; GO:0044877; GO:0046982	GO:0000786; GO:0005634; GO:0005694	TRUE	3.06864	4.69402e-17	5.54096e-16	IV	11324719	11325222	504	+	1111.29	1037.94	596.931	84.1434	125.458	118.697	120.482	102.602	70.3142	5.22101	7.74446	8.1552	1
WBGene00000804	Y48E1B.12.1	csc-1	protein_coding	protein_coding	WBGene00000804	0.5143	945	GO:0000281; GO:0007049; GO:0007079; GO:0007080; GO:0040038; GO:0045132; GO:0051301; GO:1990386	GO:0005515	GO:0000775; GO:0000793; GO:0000794; GO:0005634; GO:0005694; GO:0005737; GO:0005819; GO:0005856; GO:1990023; GO:1990385	TRUE	3.06617	2.95149e-06	1.13338e-05	II	13596955	13598068	1114	+	137.102	182.402	74.5819	14.4481	6.58941	25.8285	7.92753	9.61638	4.68545	0.478128	0.216939	0.946439
WBGene00000660	T21B4.2.1	col-85	protein_coding	protein_coding	WBGene00000660	0.6215	951	GO:0048856	GO:0042302	GO:0016020; GO:0016021	FALSE	3.06378	0.204512		II	12493800	12495106	1307	-	3.85428	1.30287	5.21035	1.03201	0	0	0.221456	0.0682551	0.325264	0.0339366	0	0
WBGene00005559	F22E5.4.1	sri-47	protein_coding	protein_coding	WBGene00005559	0.3906	978			GO:0016020; GO:0016021	FALSE	3.06091	0.436304		II	2656906	2658258	1353	+	0	0	10.4068	0	0	1.07619	0	0	0.631723	0	0	0.0381043
WBGene00016647	C44C8.2.1	fbxc-4	protein_coding	protein_coding	WBGene00016647	0.3918	1128				TRUE	3.06007	6.25498e-08	3.03924e-07	IV	899543	900918	1376	+	248.068	290.885	398.833	16.6237	28.8165	66.3022	12.0168	12.8477	20.9909	0.460875	0.794796	2.03537
WBGene00016648	C44C8.3.1	fbxc-2	protein_coding	protein_coding	WBGene00016648	0.3918	1128				TRUE	3.06007	6.25498e-08	3.03924e-07	IV	895391	896766	1376	+	248.068	290.885	398.833	16.6237	28.8165	66.3022	12.0168	12.8477	20.9909	0.460875	0.794796	2.03537
WBGene00019073	F58H7.8.1	fbxc-3	protein_coding	protein_coding	WBGene00019073	0.3918	1128				TRUE	3.06007	6.25498e-08	3.03924e-07	IV	907848	909223	1376	+	248.068	290.885	398.833	16.6237	28.8165	66.3022	12.0168	12.8477	20.9909	0.460875	0.794796	2.03537
WBGene00006394	K10D3.3.1	taf-11.2	protein_coding	protein_coding	WBGene00006394	0.3858	985	GO:0006367; GO:0045893; GO:0051123	GO:0003713; GO:0046982	GO:0005634; GO:0005669	TRUE	3.05782	0.0286598	0.0490876	I	7132747	7134312	1566	+	14.8665	14.3316	10.4068	1.03201	3.95364	0	0.824703	0.72489	0.627234	0.0327651	0.124878	0
WBGene00009144	F26A3.6.1	del-3	protein_coding	protein_coding	WBGene00009144	0.3771	1477	GO:0006811; GO:0006814; GO:0035725	GO:0005272	GO:0016020; GO:0016021	TRUE	3.05693	0.0626851	0.0976023	I	7670314	7672714	2401	-	10.4616	37.1319	97.13	0	0	17.219	0.387029	1.25251	3.90411	0	0	0.403695
WBGene00004876	K11G12.4a.1; K11G12.4b	smf-1	protein_coding	protein_coding	WBGene00004876	0.4144	1652	GO:0000041; GO:0006811; GO:0010038; GO:0010042; GO:0030001; GO:0034755; GO:0055071; GO:0055072; GO:0070574; GO:0071421; GO:1901216; GO:1905803	GO:0005381; GO:0005384; GO:0015086; GO:0046873; GO:0046915	GO:0005886; GO:0016020; GO:0016021; GO:0016324; GO:0030659; GO:0031410	TRUE	3.05535	4.57739e-22	7.58083e-21	X	6719666	6723066	3401	-	1268.61	1581.04	940.079	149.641	179.132	128.066	41.9607	47.681	33.7834	2.83274	3.37354	2.68442	1
WBGene00022162	Y71G12B.27.1	Y71G12B.27	protein_coding	protein_coding	WBGene00022162	0.4292	438	GO:0007049; GO:0007346; GO:0045737; GO:0050790; GO:0051301	GO:0016538; GO:0019901; GO:0042393; GO:0043130; GO:0061575	GO:0000307; GO:0019005	FALSE	3.05366	0.440145		I	1797435	1798722	1288	-	0.550611	4.56006	0	0	0	0	0.0686904	0.518692	0	0	0	0
WBGene00044755	C32D5.14.1	C32D5.14	protein_coding	protein_coding	WBGene00044755	0.3601	361				FALSE	3.05279	0.405023		II	6335478	6336334	857	+	0.550611	1.30287	3.46893	0	0	0	0.0833418	0.179808	0.570476	0	0	0
WBGene00001929	F54E12.1.1	his-55	protein_coding	protein_coding	WBGene00001929	0.4938	563		GO:0003677; GO:0046982	GO:0000786	TRUE	3.05174	0.00585195	0.0118932	IV	11337733	11338295	563	-	272.276	249.398	47.9399	31.6622	0	36.6952	26.4257	22.0698	5.05519	1.75873	0	2.25697
WBGene00022112	Y71F9AL.7.1	Y71F9AL.7	protein_coding	protein_coding	WBGene00022112	0.4379	934				TRUE	3.04772	0.0189896	0.0340347	I	2887800	2889434	1635	+	7.15794	20.846	26.017	4.12804	0	2.15237	0.418761	1.11196	1.65371	0.138217	0	0.0797988
WBGene00008722	F12F6.7.1; F12F6.7.2	F12F6.7	protein_coding	protein_coding	WBGene00008722	0.3924	1547	GO:0006260; GO:0006271; GO:0071897	GO:0003677; GO:0003887; GO:0016740; GO:0016779	GO:0005634; GO:0042575; GO:0043625	TRUE	3.04649	1.34606e-54	2.0146e-52	IV	11558737	11561891	3155	-	2798.2	3055.24	2726.58	373.587	325.517	338.999	98.8359	98.3939	104.635	7.55208	6.54645	7.58811	1
WBGene00016646	C44C8.1.1	fbxc-5	protein_coding	protein_coding	WBGene00016646	0.3918	1128				TRUE	3.0441	4.52958e-06	1.68597e-05	IV	903696	905071	1376	+	357.732	370.151	522.214	12.2167	42.4375	96.9509	17.329	16.3487	27.4846	0.338696	1.17048	2.97624
WBGene00016649	C44C8.4.1	fbxc-1	protein_coding	protein_coding	WBGene00016649	0.3918	1128				TRUE	3.0441	4.52958e-06	1.68597e-05	IV	891239	892614	1376	+	357.732	370.151	522.214	12.2167	42.4375	96.9509	17.329	16.3487	27.4846	0.338696	1.17048	2.97624
WBGene00011746	T13F2.6.1	T13F2.6	protein_coding	protein_coding	WBGene00011746	0.3893	2489				TRUE	3.04336	5.18937e-21	7.87368e-20	IV	9778288	9781203	2916	+	563.275	670.328	575.842	86.6887	50.0795	81.7902	12.3658	13.4176	13.735	1.08919	0.625977	1.13789	1
WBGene00012899	Y46G5A.7.1	Y46G5A.7	protein_coding	protein_coding	WBGene00012899	0.3589	953	GO:0009790			TRUE	3.04323	3.18544e-06	1.2159e-05	II	12755170	12756218	1049	-	175.094	601.276	182.119	21.6722	35.5828	59.1903	10.0393	31.4336	11.3452	0.711172	1.16164	2.15072
WBGene00012819	Y43F8B.9.1	Y43F8B.9	protein_coding	protein_coding	WBGene00012819	0.464	666				TRUE	3.03805	1.50873e-11	1.10237e-10	V	19479203	19480459	1257	+	261.54	286.632	383.316	25.8002	28.9934	58.1141	21.458	21.4419	34.169	1.21147	1.3544	3.02157	1
WBGene00013391	Y62H9A.3.1	Y62H9A.3	protein_coding	protein_coding	WBGene00013391	0.4207	725				FALSE	3.03752	0.409794		X	11879110	11879971	862	-	2.75305	0.651436	1.73446	0	0	0	0.207492	0.0447659	0.142029	0	0	0
WBGene00044424	F54D12.10.1	F54D12.10	protein_coding	protein_coding	WBGene00044424	0.3442	459				FALSE	3.03752	0.409794		II	1377628	1378359	732	-	2.75305	0.651436	1.73446	0	0	0	0.327739	0.0707087	0.224337	0	0	0
WBGene00011575	T07C12.11.1	madf-4	protein_coding	protein_coding	WBGene00011575	0.3815	1135	GO:0006357		GO:0005634; GO:0005667	TRUE	3.03683	1.82216e-06	7.24738e-06	V	9960747	9962494	1748	-	164.633	120.516	138.757	12.3841	6.58941	32.2856	7.92584	5.29007	7.25786	0.341219	0.180623	0.985006
WBGene00006499	F44A2.1a.1; F44A2.1b.1	tag-153	protein_coding	protein_coding	WBGene00006499	0.4336	2630	GO:0000289; GO:0006355; GO:2000036		GO:0000932; GO:0030015	TRUE	3.03597	2.88127e-64	8.51942e-62	V	9323085	9327209	4125	+	4597.6	4668.85	4953.62	616.109	562.736	554.237	95.5214	88.4438	111.819	7.32599	6.6569	7.29735	1
WBGene00000498	Y39H10A.7a.1; Y39H10A.7b.1; Y39H10A.7b.2	chk-1	protein_coding	protein_coding	WBGene00000498	0.4943	1774	GO:0006468; GO:0006974; GO:0007049; GO:0009792; GO:0016310; GO:0033314; GO:0035556	GO:0000166; GO:0004672; GO:0004674; GO:0004712; GO:0005524; GO:0016301; GO:0016740; GO:0106310	GO:0005634; GO:0005737; GO:0048471	TRUE	3.03213	2.3979e-20	3.48558e-19	V	3757047	3759469	2423	-	798.385	982.367	607.063	85.6567	86.9801	119.457	24.5915	27.5888	20.3156	1.50999	1.52542	2.33175	1
WBGene00013729	Y111B2A.3.1	Y111B2A.3	protein_coding	protein_coding	WBGene00013729	0.4428	2493				TRUE	3.02945	1.01285e-12	8.33591e-12	III	12496538	12499352	2815	+	682.207	795.404	740.196	135.193	46.1259	89.3235	14.9527	15.8957	17.6268	1.69589	0.575632	1.24071	1
WBGene00013517	Y73F8A.2.1	lgc-52	protein_coding	protein_coding	WBGene00013517	0.4088	1272	GO:0006811; GO:0007165; GO:0007268; GO:0034220; GO:0042391; GO:0050877; GO:1902476	GO:0004888; GO:0005216; GO:0005230; GO:0005254; GO:0030594	GO:0005886; GO:0005887; GO:0016020; GO:0016021; GO:0043005; GO:0045202	FALSE	3.02845	0.411231		IV	15236251	15243675	7425	+	0	0	17.3446	2.06402	0	0	0	0	0.80952	0.0507448	0	0
WBGene00011252	R11H6.4a.1; R11H6.4b.1; R11H6.4c.1	R11H6.4	protein_coding	protein_coding	WBGene00011252	0.402	494				TRUE	3.02804	3.1748e-07	1.41345e-06	V	14609943	14610705	763	+	151.418	287.284	88.4577	15.4801	23.7219	25.8285	16.7384	28.9557	10.6241	0.979374	1.49307	1.8094
WBGene00013312	Y57G11C.17a.1; Y57G11C.17b	hhat-2	protein_coding	protein_coding	WBGene00013312	0.4344	1110	GO:0018345	GO:0016409; GO:0016740; GO:0016746	GO:0005783; GO:0016020; GO:0016021	TRUE	3.02504	6.00745e-12	4.59195e-11	IV	14826449	14829115	2667	-	542.902	431.251	574.108	85.6567	30.3113	73.1807	26.7254	19.3562	30.7057	2.41326	0.84958	2.28297	1
WBGene00017343	F10E7.1.1	F10E7.1	protein_coding	protein_coding	WBGene00017343	0.3238	1742	GO:0006486; GO:0036065	GO:0008417; GO:0046920	GO:0016020	TRUE	3.02112	0.0714376	0.109321	II	7126757	7129015	2259	+	9.66696	9.12011	32.9548	6.19205	0	0	0.303227	0.260835	1.1231	0.111161	0	0
WBGene00022824	ZK813.5.1	ZK813.5	protein_coding	protein_coding	WBGene00022824	0.4183	1511	GO:0007186; GO:0007602; GO:0009584; GO:0071482	GO:0004930; GO:0008020	GO:0005887; GO:0016020; GO:0016021	TRUE	3.0184	0.0228687	0.0401153	X	3448744	3451222	2479	-	14.8665	14.3316	91.9266	11.3521	0	3.22856	0.537613	0.472546	3.61182	0.234951	0	0.0739895
WBGene00008080	C44B9.3.1	C44B9.3	protein_coding	protein_coding	WBGene00008080	0.3998	1143			GO:0016020; GO:0016021	FALSE	3.01719	0.445766		III	10878191	10880183	1993	-	4.9555	0	0	0	0	0	0.236901	0	0	0	0	0
WBGene00009152	F26D2.14.1	F26D2.14	protein_coding	protein_coding	WBGene00009152	0.4837	765				FALSE	3.01719	0.445766		V	16435855	16436736	882	+	4.9555	0	0	0	0	0	0.353958	0	0	0	0	0
WBGene00010171	F56H6.11.1	oac-35	protein_coding	protein_coding	WBGene00010171	0.4036	1992	GO:0009103; GO:0033692	GO:0016747	GO:0016020; GO:0016021	FALSE	3.01719	0.445766		I	12307731	12310406	2676	+	4.9555	0	0	0	0	0	0.135933	0	0	0	0	0
WBGene00005711	T03G11.2.1	sru-48	protein_coding	protein_coding	WBGene00005711	0.4026	996			GO:0016020; GO:0016021	FALSE	3.01492	0.443322		X	5180174	5181495	1322	+	0	9.77155	0	1.03201	0	0	0	0.488785	0	0.0324033	0	0
WBGene00017893	F28B4.4.1; F28B4.4.2	F28B4.4	protein_coding	protein_coding	WBGene00017893	0.406	699			GO:0016020; GO:0016021	TRUE	3.01449	0.0217981	0.0384747	X	3206818	3209644	2827	-	33.0366	280.118	22.548	12.3841	0	29.0571	2.58252	19.9653	1.91505	0.554054	0	1.43946
WBGene00001117	F54C1.5a.1; F54C1.5b.1; F54C1.5b.2	dyf-1	protein_coding	protein_coding	WBGene00001117	0.3763	2189	GO:0018095; GO:0030030; GO:0042073; GO:0072659	GO:0120170	GO:0005879; GO:0005929; GO:0030992; GO:0036064; GO:0042995	TRUE	3.01201	2.85604e-05	9.35271e-05	I	4989568	4994675	5108	-	183.904	190.871	792.65	26.8322	35.5828	81.7902	4.59062	4.34417	21.4973	0.383333	0.505728	1.29384
WBGene00017700	F22D3.4.1	F22D3.4	protein_coding	protein_coding	WBGene00017700	0.3525	1458				FALSE	3.01141	0.0913714		II	6924115	6925951	1837	-	1.10122	14.983	10.4068	1.03201	0	2.15237	0.0412708	0.511983	0.423749	0.0221356	0	0.0511194
WBGene00013960	ZK265.8a.1; ZK265.8b.1; ZK265.8b.2	cutl-8	protein_coding	protein_coding	WBGene00013960	0.3882	1330			GO:0016020; GO:0016021	TRUE	3.00925	1.69949e-14	1.65486e-13	I	8270304	8275701	5398	+	2390.75	2057.89	2756.06	298.251	166.053	429.399	98.2219	77.0874	123.023	7.01285	3.88434	11.1798	1
WBGene00000736	F46B3.17.1	col-163	protein_coding	protein_coding	WBGene00000736	0.4962	2223			GO:0005581; GO:0016020; GO:0016021	FALSE	3.00916	0.447009		V	20600095	20602474	2380	+	3.30366	0	1.73446	0	0	0	0.0812049	0	0.0463207	0	0	0
WBGene00008793	F14D7.6a.1; F14D7.6b.1; F14D7.6b.2; F14D7.6c.1; F14D7.6c.2; F14D7.6c.3; F14D7.6c.4; F14D7.6d.1	F14D7.6	protein_coding	protein_coding	WBGene00008793	0.3851	1423	GO:0006810; GO:0055085	GO:0022857	GO:0016020; GO:0016021	FALSE	3.00743	0.279973		V	14301413	14306444	5032	+	0	8.46867	8.67231	2.06402	0	0	0	0.2965	0.361809	0.04536	0	0
WBGene00004721	ZC328.4.1	san-1	protein_coding	protein_coding	WBGene00004721	0.3858	1410	GO:0006468; GO:0007094; GO:0034059; GO:0051726; GO:0051754	GO:0004672; GO:0005515	GO:0000776; GO:0005634; GO:0005654; GO:0043229	TRUE	3.00447	3.87715e-12	3.01686e-11	I	6407458	6409212	1755	+	314.399	284.026	303.531	57.7925	23.7219	30.1332	12.1839	10.0358	12.7801	1.28179	0.523423	0.740035	1
WBGene00010370	H06O01.3a.1; H06O01.3b.1; H06O01.3c.1	ctg-1	protein_coding	protein_coding	WBGene00010370	0.3877	1219	GO:0110011		GO:0005737; GO:0005829	TRUE	3.00087	1.57827e-18	2.05735e-17	I	7005443	7009190	3748	+	14073	10233.4	17381.1	1243.57	2272.03	1692.84	630.826	418.244	846.49	31.903	57.9874	48.0882	1
WBGene00011277	R53.8.1	R53.8	protein_coding	protein_coding	WBGene00011277	0.3833	600				FALSE	3.00076	0.448312		II	9976705	9977877	1173	+	1.65183	0	3.46893	0	0	0	0.150432	0	0.343236	0	0	0
WBGene00012626	Y38H6C.14.1	famh-161	protein_coding	protein_coding	WBGene00012626	0.4563	2709	GO:0044782	GO:0005515	GO:0005737; GO:0005856; GO:0005929; GO:0005930; GO:0035869; GO:0042995; GO:0097546	TRUE	2.99942	0.0145737	0.0268832	V	20529953	20534169	4217	-	28.6318	72.3094	150.898	0	26.3576	5.38094	0.577517	1.32984	3.30693	0	0.302706	0.0687819
WBGene00012935	Y47D3A.28.1	mcm-10	protein_coding	protein_coding	WBGene00012935	0.4596	2178	GO:0006260; GO:0006270	GO:0003688; GO:0003690; GO:0003697; GO:0046872	GO:0005634; GO:0031298	TRUE	2.99862	2.34658e-13	2.05139e-12	III	11317570	11326664	9095	+	167.936	152.436	137.023	18.5762	17.1325	21.5237	4.2132	3.48693	3.73494	0.266725	0.244729	0.342204	1
WBGene00009507	F37D6.1.1	mus-101	protein_coding	protein_coding	WBGene00009507	0.4106	3692	GO:0006261; GO:0006270; GO:0006974; GO:0007095; GO:0009792; GO:0033314; GO:0036093			TRUE	2.99843	3.73941e-18	4.77188e-17	I	10479283	10484969	5687	-	994.954	880.091	745.819	121.777	69.8477	135.6	14.7254	11.8762	11.9928	1.0315	0.588591	1.27181	1
WBGene00001902	K06C4.2.1	his-28	protein_coding	protein_coding	WBGene00001902	0.5353	312		GO:0003677; GO:0046982		TRUE	2.99671	0.00146446	0.00341835	V	8889488	8889799	312	-	61.4895	88.1296	23.1199	2.93797	16.2595	2.806	10.7689	14.0728	4.39927	0.294482	1.62135	0.311428
WBGene00001924	F07B7.9.1	his-50	protein_coding	protein_coding	WBGene00001924	0.5353	312		GO:0003677; GO:0046982		TRUE	2.99671	0.00146446	0.00341835	V	8847393	8847704	312	-	61.4895	88.1296	23.1199	2.93797	16.2595	2.806	10.7689	14.0728	4.39927	0.294482	1.62135	0.311428
WBGene00011038	R05H5.3.1	R05H5.3	protein_coding	protein_coding	WBGene00011038	0.4538	595				TRUE	2.99669	2.49015e-11	1.77681e-10	II	10197625	10198324	700	+	2643.48	2931.46	1097.92	366.363	201.636	267.971	242.764	245.46	109.547	19.2557	10.5432	15.5954	1
WBGene00004737	F10G7.4.1	scc-1	protein_coding	protein_coding	WBGene00004737	0.4464	2135	GO:0007049; GO:0007062; GO:0007064; GO:0007130; GO:0051301; GO:0051321; GO:1990414	GO:0003682; GO:0003684	GO:0000795; GO:0005634; GO:0005694; GO:0005737; GO:0008278; GO:0034990; GO:0034991	TRUE	2.99543	1.01154e-17	1.24876e-16	II	4698721	4700994	2274	+	524.181	655.345	385.051	74.3046	54.0331	67.7998	13.4156	15.2928	10.707	1.08839	0.787382	1.09965	1
WBGene00003377	C39E6.4.1	mls-2	protein_coding	protein_coding	WBGene00003377	0.4069	1295	GO:0000132; GO:0002119; GO:0003387; GO:0006357; GO:0008284; GO:0042661; GO:0045687; GO:0045944	GO:0000977; GO:0000981; GO:0003677	GO:0005634	FALSE	2.99194	0.449682		X	4758804	4761612	2809	-	0	0	5.20339	0	0	0	0	0	0.238543	0	0	0
WBGene00005389	Y60A3A.4a.1; Y60A3A.4b.1	srh-173	protein_coding	protein_coding	WBGene00005389	0.4051	803			GO:0016020; GO:0016021	FALSE	2.99194	0.449682		V	19973284	19975063	1780	+	0	0	5.20339	0	0	0	0	0	0.384459	0	0	0
WBGene00005594	F31F4.8.1	srj-6	protein_coding	protein_coding	WBGene00005594	0.4086	996			GO:0016020; GO:0016021	FALSE	2.99194	0.449682		V	653303	654502	1200	-	0	0	5.20339	0	0	0	0	0	0.310153	0	0	0
WBGene00006235	Y68A4A.3.1	str-199	protein_coding	protein_coding	WBGene00006235	0.3786	972	GO:0007186; GO:0042048; GO:0050911	GO:0038022	GO:0005887; GO:0016020; GO:0016021	FALSE	2.99194	0.449682		V	17189186	17190499	1314	-	0	0	5.20339	0	0	0	0	0	0.317811	0	0	0
WBGene00006925	K09F5.2.1	vit-1	protein_coding	protein_coding	WBGene00006925	0.475	5088	GO:0006869	GO:0005319; GO:0045735	GO:0005576	FALSE	2.99194	0.449682		X	7727889	7733168	5280	+	0	0	5.20339	0	0	0	0	0	0.060714	0	0	0
WBGene00007369	C06B8.3.1	C06B8.3	protein_coding	protein_coding	WBGene00007369	0.4499	489		GO:0016491		FALSE	2.99194	0.449682		V	15484054	15484637	584	-	0	0	5.20339	0	0	0	0	0	0.631723	0	0	0
WBGene00008015	C38D9.7.1	fbxa-174	protein_coding	protein_coding	WBGene00008015	0.3654	1218				FALSE	2.99194	0.449682		V	17555854	17558477	2624	-	0	0	5.20339	0	0	0	0	0	0.253623	0	0	0
WBGene00008162	C47F8.6.1	C47F8.6	protein_coding	protein_coding	WBGene00008162	0.4413	1074	GO:0006486	GO:0016740; GO:0016757; GO:0016758	GO:0000139; GO:0005794; GO:0016020; GO:0016021	FALSE	2.99194	0.449682		I	12319350	12320854	1505	+	0	0	5.20339	0	0	0	0	0	0.287628	0	0	0
WBGene00009874	F49C12.4.1	F49C12.4	protein_coding	protein_coding	WBGene00009874	0.3664	969			GO:0016020; GO:0016021	FALSE	2.99194	0.449682		IV	9302665	9304094	1430	-	0	0	5.20339	0	0	0	0	0	0.318795	0	0	0
WBGene00010099	F55C9.1.1	fbxb-117	protein_coding	protein_coding	WBGene00010099	0.3973	1032				FALSE	2.99194	0.449682		V	19282614	19284594	1981	+	0	0	5.20339	0	0	0	0	0	0.299334	0	0	0
WBGene00010145	F56C4.2.1	F56C4.2	protein_coding	protein_coding	WBGene00010145	0.3933	600			GO:0016020; GO:0016021	FALSE	2.99194	0.449682		IV	10639277	10642690	3414	+	0	0	5.20339	0	0	0	0	0	0.514854	0	0	0
WBGene00013822	Y116F11B.6.1	Y116F11B.6	protein_coding	protein_coding	WBGene00013822	0.3914	1068				FALSE	2.99194	0.449682		V	19842632	19845977	3346	-	0	0	5.20339	0	0	0	0	0	0.289244	0	0	0
WBGene00015087	B0252.1.1	B0252.1	protein_coding	protein_coding	WBGene00015087	0.3472	2615	GO:0006468; GO:0007169; GO:0007275; GO:0007409; GO:0016310; GO:0033674	GO:0004672; GO:0016301	GO:0005887; GO:0016020; GO:0016021; GO:0043235	FALSE	2.99194	0.449682		II	6919680	6923665	3986	+	0	0	5.20339	0	0	0	0	0	0.118131	0	0	0
WBGene00016834	C50E10.11.1	sre-50	protein_coding	protein_coding	WBGene00016834	0.3908	1062	GO:0007606		GO:0016020; GO:0016021	FALSE	2.99194	0.449682		II	12303525	12305132	1608	+	0	0	5.20339	0	0	0	0	0	0.290878	0	0	0
WBGene00017091	E02C12.4.1	ttr-40	protein_coding	protein_coding	WBGene00017091	0.3402	485			GO:0005576; GO:0009986	FALSE	2.99194	0.449682		V	9354512	9355471	960	-	0	0	5.20339	0	0	0	0	0	0.636933	0	0	0
WBGene00017264	F08F3.8.1	F08F3.8	protein_coding	protein_coding	WBGene00017264	0.4331	912			GO:0016020; GO:0016021	FALSE	2.99194	0.449682		V	5431512	5432599	1088	-	0	0	5.20339	0	0	0	0	0	0.33872	0	0	0
WBGene00018143	F37C4.3.1	oac-23	protein_coding	protein_coding	WBGene00018143	0.407	2128	GO:0009103; GO:0033692	GO:0016747	GO:0016020; GO:0016021	FALSE	2.99194	0.449682		IV	3881852	3884683	2832	+	0	0	5.20339	0	0	0	0	0	0.145166	0	0	0
WBGene00018821	F54D12.8.1	F54D12.8	protein_coding	protein_coding	WBGene00018821	0.453	1011				FALSE	2.99194	0.449682		II	1395004	1398038	3035	-	0	0	5.20339	0	0	0	0	0	0.305552	0	0	0
WBGene00018970	F56D6.1.1	clec-68	protein_coding	protein_coding	WBGene00018970	0.4173	1402	GO:0045087	GO:0030246		FALSE	2.99194	0.449682		IV	3926417	3929024	2608	+	0	0	5.20339	0	0	0	0	0	0.220337	0	0	0
WBGene00019024	F58A6.5.1	F58A6.5	protein_coding	protein_coding	WBGene00019024	0.3808	977			GO:0016020; GO:0016021	FALSE	2.99194	0.449682		II	5146967	5148465	1499	-	0	0	5.20339	0	0	0	0	0	0.316185	0	0	0
WBGene00019035	F58E1.3.1	fbxb-26	protein_coding	protein_coding	WBGene00019035	0.3704	1088				FALSE	2.99194	0.449682		II	1682518	1683655	1138	+	0	0	5.20339	0	0	0	0	0	0.283927	0	0	0
WBGene00019094	F59A7.7.1	F59A7.7	protein_coding	protein_coding	WBGene00019094	0.501	489	GO:0006535; GO:0019344	GO:0004124	GO:0005737	FALSE	2.99194	0.449682		V	2012206	2013333	1128	+	0	0	5.00133	0	0	0	0	0	0.607191	0	0	0
WBGene00020537	T16A1.8.1	fbxb-37	protein_coding	protein_coding	WBGene00020537	0.3537	1148				FALSE	2.99194	0.449682		II	2092681	2093876	1196	-	0	0	5.20339	0	0	0	0	0	0.269088	0	0	0
WBGene00021450	Y39D8B.2.1	mltn-6	protein_coding	protein_coding	WBGene00021450	0.4455	2469			GO:0016020; GO:0016021	FALSE	2.99194	0.449682		V	364950	369088	4139	+	0	0	5.20339	0	0	0	0	0	0.125117	0	0	0
WBGene00044020	ZK856.14a.1; ZK856.14b.1	ZK856.14	protein_coding	protein_coding	WBGene00044020	0.3762	743			GO:0016020; GO:0016021	FALSE	2.99194	0.449682		V	10217079	10219022	1944	+	0	0	5.20339	0	0	0	0	0	0.415484	0	0	0
WBGene00013043	Y49E10.24a.1; Y49E10.24b.1	arrd-16	protein_coding	protein_coding	WBGene00013043	0.4262	1007	GO:0015031		GO:0005737	TRUE	2.99175	0.185606	0.249236	III	12484732	12488339	3608	+	14.3159	37.1319	0	0	0	6.45712	0.776809	1.83709	0	0	0	0.222042
WBGene00021496	Y40C5A.3a.1; Y40C5A.3b.1; Y40C5A.3c.1; Y40C5A.3d.1; Y40C5A.3e.1; Y40C5A.3f.1; Y40C5A.3g.1; Y40C5A.3h.1; Y40C5A.3i.1; Y40C5A.3j.1; Y40C5A.3k.1; Y40C5A.3l.1; Y40C5A.3m.1; Y40C5A.3n.1; Y40C5A.3o.1; Y40C5A.3p.1; Y40C5A.3q.1	Y40C5A.3	protein_coding	protein_coding	WBGene00021496	0.4607	4903				TRUE	2.98688	0.0311582	0.0528591	IV	7333638	7346851	13214	-	12.1134	7.1658	15.6102	2.06402	0	2.15237	0.134999	0.0728142	0.189014	0.0131649	0	0.0152013
WBGene00004354	F45B8.1.1	rgs-11	protein_coding	protein_coding	WBGene00004354	0.398	1103	GO:0009968			TRUE	2.98325	0.0649976	0.100737	X	14964553	14965976	1424	+	31.3848	26.0575	8.67232	8.25607	0	0	1.55478	1.17698	0.466776	0.234079	0	0
WBGene00012333	W07G1.6.1	sre-43	protein_coding	protein_coding	WBGene00012333	0.4367	1083	GO:0007606		GO:0016020; GO:0016021	FALSE	2.97424	0.0567709		II	13966534	13969079	2546	-	2.75305	30.6175	8.67232	3.09603	0	2.15237	0.138903	1.40849	0.475397	0.0894007	0	0.06882
WBGene00016221	C29F9.6.1; C29F9.6.2; C29F9.6.3	C29F9.6	protein_coding	protein_coding	WBGene00016221	0.4895	986	GO:0006355	GO:0003712; GO:0046872	GO:0005634	TRUE	2.96949	9.20845e-15	9.07594e-14	III	114903	116619	1717	+	7225.66	8303.86	4962.3	604.757	1282.3	730.73	400.43	419.582	298.783	19.1809	40.4609	25.6629	1
WBGene00012077	T27A8.5.1	T27A8.5	protein_coding	protein_coding	WBGene00012077	0.4225	1704				FALSE	2.9671	0.216744		X	16063860	16066877	3018	-	2.20244	3.90862	3.46893	1.03201	0	0	0.0706254	0.114279	0.120858	0.0189399	0	0
WBGene00022213	Y73B3A.11.1	Y73B3A.11	protein_coding	protein_coding	WBGene00022213	0.4242	396				TRUE	2.96414	5.49636e-05	0.000170546	X	146463	148812	2350	+	58.3647	56.0235	52.0339	3.09603	5.27153	12.9142	8.05343	7.04837	7.80083	0.244497	0.414156	1.12927
WBGene00010836	M03B6.4.1	M03B6.4	protein_coding	protein_coding	WBGene00010836	0.3758	1381			GO:0016020; GO:0016021	TRUE	2.96308	0.00767347	0.0151779	X	13858841	13861066	2226	+	22.0244	65.7951	36.4237	11.3521	0	4.30475	0.871438	2.37363	1.56581	0.257068	0	0.107939
WBGene00206412	T24H7.8.1	T24H7.8	protein_coding	protein_coding	WBGene00206412	0.3426	359				TRUE	2.96238	0.0140744	0.0260373	II	6242096	6242523	428	+	17.6195	33.8747	19.0791	0	2.63576	6.45712	2.6818	4.70105	3.1551	0	0.228421	0.622831
WBGene00018726	F53A9.3.1	F53A9.3	protein_coding	protein_coding	WBGene00018726	0.3788	499				FALSE	2.95934	0.36017		X	8708365	8709370	1006	+	1.10122	0	8.67232	0	0	1.07619	0.120587	0	1.03177	0	0	0.0746815
WBGene00021898	Y54G2A.36.1; Y54G2A.36.2; Y54G2A.36.3; Y54G2A.36.4	Y54G2A.36	protein_coding	protein_coding	WBGene00021898	0.4506	797			GO:0016020; GO:0016021	TRUE	2.95906	1.92058e-06	7.59646e-06	IV	2897694	2901648	3955	+	71.0287	63.1893	114.454	6.68774	10.5431	15.0666	4.86664	3.94754	8.52017	0.262249	0.4113	0.6542
WBGene00000870	Y38F1A.5.1; Y38F1A.5.2	cyd-1	protein_coding	protein_coding	WBGene00000870	0.4563	1898	GO:0000079; GO:0002119; GO:0007049; GO:0007506; GO:0007530; GO:0008356; GO:0008406; GO:0008584; GO:0010628; GO:0030154; GO:0032875; GO:0032877; GO:0040035; GO:0044772; GO:0044843; GO:0051301; GO:0051302; GO:0051781; GO:0051782; GO:0090727; GO:1900087; GO:1902806; GO:1904787	GO:0005515; GO:0016538	GO:0000307; GO:0005634; GO:0005737	TRUE	2.95864	6.27878e-16	6.77806e-15	II	12980591	12993118	12528	+	1166.19	1240.34	650.425	124.873	160.782	108.695	33.5738	32.5579	20.3446	2.05749	2.6355	1.98307	1
WBGene00011228	R11.3.1	R11.3	protein_coding	protein_coding	WBGene00011228	0.4115	1587				TRUE	2.95834	0.0243894	0.0424694	X	16196911	16199932	3022	-	30.2836	13.0287	34.6893	0	1.31788	8.6095	1.04269	0.409014	1.29768	0	0.0258358	0.187857
WBGene00004180	F58A4.4a.1; F58A4.4b.1; F58A4.4b.2	pri-1	protein_coding	protein_coding	WBGene00004180	0.3947	753	GO:0006260; GO:0006269	GO:0003896; GO:0003899; GO:0016740; GO:0016779; GO:0046872	GO:0005658; GO:1990077	TRUE	2.95432	3.24681e-09	1.83844e-08	III	9612254	9614281	2028	-	176.557	200.478	278.901	35.0883	13.5922	35.1512	12.8	13.252	21.9685	1.45589	0.561068	1.61498
WBGene00013333	Y57G11C.44a.1; Y57G11C.44b.1; Y57G11C.44c.1	Y57G11C.44	protein_coding	protein_coding	WBGene00013333	0.4184	346	GO:0006811; GO:0006814; GO:0035725	GO:0005272	GO:0016020; GO:0016021	FALSE	2.95257	0.193832		IV	14770654	14771425	772	-	2.20244	12.3773	1.73446	2.06402	0	0	0.34782	1.78222	0.297604	0.186553	0	0
WBGene00020379	T09B4.5a.1; T09B4.5b.1	T09B4.5	protein_coding	protein_coding	WBGene00020379	0.4258	1267			GO:0016020; GO:0016021	TRUE	2.9519	6.89183e-10	4.22608e-09	I	6154075	6157438	3364	+	987.798	2574.47	1139.54	130.033	260.941	217.39	42.6008	101.234	53.3953	3.20953	6.4075	5.9414	1
WBGene00019586	K09F6.3.1	K09F6.3	protein_coding	protein_coding	WBGene00019586	0.4158	4252	GO:0006470; GO:0035335	GO:0004725	GO:0016020; GO:0016021	TRUE	2.94468	0.0710125	0.108752	II	2255172	2261142	5971	+	14.8665	14.983	12.1412	0	0	5.38094	0.191047	0.175558	0.169519	0	0	0.0438218
WBGene00020849	T27B7.2.1	nhr-225	protein_coding	protein_coding	WBGene00020849	0.3921	1219	GO:0006355	GO:0003677; GO:0003700; GO:0008270; GO:0043565; GO:0046872	GO:0005634	TRUE	2.94436	1.46879e-16	1.68619e-15	V	2288328	2290468	2141	-	1340.18	1379.09	1340.74	116.617	258.305	153.895	60.0738	56.3641	65.2966	2.99173	6.59253	4.37165	1
WBGene00020134	T01B6.1.1	T01B6.1	protein_coding	protein_coding	WBGene00020134	0.4482	1111				TRUE	2.93999	1.03422e-05	3.63102e-05	X	2335684	2348635	12952	+	145.912	379.787	97.13	28.8962	14.4967	37.6665	7.17632	17.031	5.19025	0.813378	0.405955	1.174
WBGene00007168	B0393.3.1	B0393.3	protein_coding	protein_coding	WBGene00007168	0.4164	2154	GO:0031146		GO:0019005	TRUE	2.93858	1.11427e-25	2.30517e-24	III	4757201	4759728	2528	+	3877.95	4390.68	3952.84	686.286	506.067	401.418	98.3744	101.555	108.946	9.96378	7.30946	6.45322	1
WBGene00022729	ZK402.2.1	ZK402.2	protein_coding	protein_coding	WBGene00022729	0.4485	330				TRUE	2.93782	1.0104e-06	4.182e-06	X	1403744	1404117	374	+	88.2337	112.579	50.3995	10.7011	13.0193	10.0715	14.6099	16.9963	9.06696	1.0141	1.22743	1.05683
WBGene00004874	F35G12.8.1; F35G12.8.2	smc-4	protein_coding	protein_coding	WBGene00004874	0.4126	5002	GO:0000070; GO:0007049; GO:0007076; GO:0030261; GO:0051276; GO:0051301; GO:0051321; GO:0110039	GO:0000166; GO:0005515; GO:0005524; GO:0016887	GO:0000775; GO:0000793; GO:0005634; GO:0005694	TRUE	2.93721	1.32149e-16	1.5243e-15	III	4587415	4593124	5710	+	2612.1	2579.04	2414.37	465.436	200.318	326.085	28.5346	25.6879	28.6556	2.90992	1.24595	2.25742	1
WBGene00019614	K10B4.2.1	srt-54	protein_coding	protein_coding	WBGene00019614	0.3875	1164			GO:0016020; GO:0016021	TRUE	2.93606	0.151458	0.209244	II	117216	118691	1476	+	6.05672	16.2859	1.73446	3.09603	0	0	0.284322	0.697064	0.088463	0.0831796	0	0
WBGene00021505	Y41D4A.3.1	Y41D4A.3	protein_coding	protein_coding	WBGene00021505	0.3756	1222				TRUE	2.93494	0.00683244	0.0136863	IV	1753824	1755750	1927	+	27.5305	31.269	41.6271	4.12804	9.22517	0	1.23103	1.27484	2.02234	0.105642	0.234869	0
WBGene00007937	C34E11.4.1	C34E11.4	protein_coding	protein_coding	WBGene00007937	0.3426	467				FALSE	2.93443	0.356798		X	11804210	11805306	1097	+	0	2.60575	6.93786	0	0	1.07619	0	0.27799	0.881978	0	0	0.0797988
WBGene00007652	C17G1.5.1	C17G1.5	protein_coding	protein_coding	WBGene00007652	0.3945	1346				TRUE	2.93136	5.36569e-55	8.44783e-53	X	9941630	9944838	3209	+	2190.33	2272.86	2391.83	293.091	295.205	309.942	88.9181	84.1282	105.495	6.8096	6.82343	7.97372	1
WBGene00013491	Y70C5B.1.1	Y70C5B.1	protein_coding	protein_coding	WBGene00013491	0.423	513				TRUE	2.92064	0.0496447	0.0796404	V	16662114	16662960	847	-	6.33202	9.77155	20.8136	0	3.95364	1.07619	0.674451	0.948985	2.40868	0	0.239775	0.0726434
WBGene00235081	W06G6.21.1	W06G6.21	protein_coding	protein_coding	WBGene00235081	0.423	513				TRUE	2.92064	0.0496447	0.0796404	V	16652498	16653344	847	+	6.33202	9.77155	20.8136	0	3.95364	1.07619	0.674451	0.948985	2.40868	0	0.239775	0.0726434
WBGene00009326	F32D8.1.1	F32D8.1	protein_coding	protein_coding	WBGene00009326	0.392	1130	GO:0006468; GO:0016310	GO:0000166; GO:0004672; GO:0004674; GO:0005524; GO:0016301		TRUE	2.91823	0.000502648	0.00129789	V	10880837	10883399	2563	+	197.669	733.517	195.994	47.4724	93.5696	8.6095	9.55842	32.3404	10.2971	1.3138	2.5762	0.26383
WBGene00019595	K09H9.2.1; K09H9.2.2	dscc-1	protein_coding	protein_coding	WBGene00019595	0.436	1388	GO:0006260; GO:0007064; GO:0034088		GO:0000775; GO:0000785; GO:0005634; GO:0031390	TRUE	2.91782	5.83501e-19	7.76486e-18	I	3147996	3150349	2354	+	471.323	540.041	400.661	77.4007	48.7616	60.2665	18.5547	19.3843	17.1371	1.74389	1.09298	1.50353	1
WBGene00009343	F32H2.6.1	F32H2.6	protein_coding	protein_coding	WBGene00009343	0.3881	639		GO:0016746		TRUE	2.91732	0.0613811	0.0958255	I	8998532	8999564	1033	-	7.15794	10.423	6.93786	2.06402	0	1.07619	0.612086	0.812652	0.644575	0.101013	0	0.0583193
WBGene00021372	Y37E11AR.5a.1; Y37E11AR.5b.1	ugt-45	protein_coding	protein_coding	WBGene00021372	0.4472	1668		GO:0008194; GO:0015020; GO:0016740; GO:0016757	GO:0016020; GO:0016021; GO:0043231	TRUE	2.91679	1.47199e-10	9.60958e-10	IV	3748210	3751101	2892	-	329.816	299.661	345.158	63.9846	21.0861	43.0475	10.8044	8.9505	12.2849	1.19962	0.3933	0.89367	1
WBGene00008218	C50B6.2.1	nasp-2	protein_coding	protein_coding	WBGene00008218	0.4691	1925	GO:0006335; GO:0034080	GO:0042393	GO:0005634; GO:0005654	TRUE	2.90893	0.00014025	0.000403286	V	13310186	13312260	2075	-	549.51	478.806	542.887	107.329	6.58941	94.7045	15.598	12.392	16.7428	1.74362	0.106497	1.70359
WBGene00001119	C04C3.5a.1; C04C3.5b.1; C04C3.5c.1	dyf-3	protein_coding	protein_coding	WBGene00001119	0.5221	1203	GO:0006935; GO:0007635; GO:0010446; GO:0030030; GO:0060271	GO:0003674	GO:0005813; GO:0005929; GO:0030424; GO:0030425; GO:0030992; GO:0042995; GO:0043025	TRUE	2.90216	0.000292172	0.000790626	IV	3396581	3399123	2543	-	63.3202	98.3672	379.848	16.5121	40.8544	15.0666	2.87609	4.07378	18.7453	0.429242	1.05656	0.433686
WBGene00004339	C39E9.13.1	rfc-3	protein_coding	protein_coding	WBGene00004339	0.4337	1199	GO:0006260; GO:0006261; GO:0006281	GO:0003677; GO:0003689; GO:0005515	GO:0005634; GO:0005663	TRUE	2.89673	3.87859e-23	7.01794e-22	IV	13095762	13097065	1304	+	1671.1	2376.44	1814.25	273.482	311.02	203.399	76.157	98.7464	89.8312	7.13305	8.07035	5.8743	1
WBGene00020466	T12F5.1.1	sld-2	protein_coding	protein_coding	WBGene00020466	0.4	880				TRUE	2.89647	5.44831e-05	0.000169099	I	3741456	3742646	1191	+	84.2434	57.3264	38.1582	8.25607	3.95364	11.8381	5.23093	3.24553	2.57427	0.293397	0.139778	0.465826
WBGene00016381	C33H5.15a.1; C33H5.15b.1	sgo-1	protein_coding	protein_coding	WBGene00016381	0.3884	1060	GO:0007049; GO:0007059; GO:0051301		GO:0000775; GO:0005634; GO:0005694	TRUE	2.89541	9.29383e-11	6.22825e-10	IV	7794871	7796376	1506	-	316.05	413.011	336.486	56.7605	63.2583	23.6761	16.2921	19.4119	18.8456	1.67458	1.85667	0.773446	1
WBGene00001880	F45F2.13.1	his-6	protein_coding	protein_coding	WBGene00001880	0.5059	591		GO:0003677; GO:0046982	GO:0000786	TRUE	2.89314	8.17559e-11	5.51239e-10	V	8534387	8534977	591	-	499.818	960.217	382.673	75.8298	101.559	72.2956	46.2115	80.946	38.4406	4.01252	5.34629	4.23594	1
WBGene00001186	F55A8.1a.1; F55A8.1a.2; F55A8.1b.1	egl-18	protein_coding	protein_coding	WBGene00001186	0.486	1362	GO:0000122; GO:0001708; GO:0002119; GO:0006355; GO:0006357; GO:0009888; GO:0045165; GO:0045944; GO:0061025; GO:0110039	GO:0000978; GO:0000981; GO:0003700; GO:0008270; GO:0043565	GO:0005634	TRUE	2.89261	3.20006e-10	2.02582e-09	IV	1902323	1917841	15519	+	1178.31	569.356	976.503	117.649	69.8477	178.647	47.2723	20.8267	42.5643	2.70133	1.59551	4.54198	1
WBGene00013871	ZC374.1.1	gnrr-3	protein_coding	protein_coding	WBGene00013871	0.4327	1188	GO:0007186; GO:0007218	GO:0004930; GO:0008528	GO:0005887; GO:0016020; GO:0016021	FALSE	2.89186	0.328159		X	10049460	10052481	3022	+	0	14.3316	1.73446	0	0	2.15237	0	0.601024	0.0866758	0	0	0.0627375
WBGene00000629	D1007.2.1	col-52	protein_coding	protein_coding	WBGene00000629	0.4752	907	GO:0048856		GO:0005581	FALSE	2.89099	0.465529		I	4571214	4572787	1574	-	0	4.56006	0	0	0	0	0	0.250482	0	0	0	0
WBGene00003426	F36H12.7.1	msp-19	protein_coding	protein_coding	WBGene00003426	0.4858	457			GO:0005737; GO:0005856; GO:0031143; GO:0042995	FALSE	2.89099	0.465529		IV	5260554	5261010	457	+	0	4.8127	0	0	0	0	0	0.524669	0	0	0	0
WBGene00005908	F55B12.8.1	srx-17	protein_coding	protein_coding	WBGene00005908	0.336	756			GO:0016020; GO:0016021	FALSE	2.89099	0.465529		V	13841146	13842481	1336	+	0	4.56006	0	0	0	0	0	0.300512	0	0	0	0
WBGene00007458	C08F11.11.1; C08F11.11.2; C08F11.11.3	ule-4	protein_coding	protein_coding	WBGene00007458	0.3802	423			GO:0005576	FALSE	2.89099	0.465529		IV	13646735	13647658	924	-	0	4.56006	0	0	0	0	0	0.536705	0	0	0	0
WBGene00013840	ZC47.7.1	fbxa-151	protein_coding	protein_coding	WBGene00013840	0.4101	834	GO:0045087			FALSE	2.89099	0.465529		III	1265673	1266855	1183	-	0	4.56006	0	0	0	0	0	0.272407	0	0	0	0
WBGene00018545	F47C10.8.1	nhr-189	protein_coding	protein_coding	WBGene00018545	0.3908	1108	GO:0006355	GO:0003677; GO:0003700; GO:0008270; GO:0043565; GO:0046872	GO:0005634	FALSE	2.89099	0.465529		V	3858461	3860243	1783	-	0	4.56006	0	0	0	0	0	0.205042	0	0	0	0
WBGene00022096	Y69A2AR.25.1	Y69A2AR.25	protein_coding	protein_coding	WBGene00022096	0.4203	1035				FALSE	2.89099	0.465529		IV	2565820	2568367	2548	-	0	4.27497	0	0	0	0	0	0.205781	0	0	0	0
WBGene00044158	Y53C12A.8.1	Y53C12A.8	protein_coding	protein_coding	WBGene00044158	0.3804	970				FALSE	2.89099	0.465529		II	9698281	9700463	2183	-	0	4.56006	0	0	0	0	0	0.234213	0	0	0	0
WBGene00077514	F07B10.7a.1; F07B10.7b.1	F07B10.7	protein_coding	protein_coding	WBGene00077514	0.3473	837			GO:0016020; GO:0016021	FALSE	2.89099	0.465529		V	11259312	11260722	1411	-	0	4.56006	0	0	0	0	0	0.27143	0	0	0	0
WBGene00206390	F14F7.7.1	F14F7.7	protein_coding	protein_coding	WBGene00206390	0.3633	501				FALSE	2.89099	0.465529		III	13030920	13031858	939	+	0	4.56006	0	0	0	0	0	0.453467	0	0	0	0
WBGene00007258	C01H6.9.1	hasp-1	protein_coding	protein_coding	WBGene00007258	0.4007	2995	GO:0000278; GO:0016310; GO:0035556; GO:0072355	GO:0000166; GO:0001965; GO:0004674; GO:0004712; GO:0005524; GO:0016301; GO:0016740; GO:0072354; GO:0106310	GO:0005634; GO:0005737	TRUE	2.8897	1.8056e-11	1.30917e-10	I	7229433	7233121	3689	-	616.684	405.193	596.656	87.7208	38.2186	91.4759	11.251	6.7403	11.827	0.915947	0.397009	1.05763	1
WBGene00006571	Y75B8A.22.1; Y75B8A.22.2	tim-1	protein_coding	protein_coding	WBGene00006571	0.4598	4162	GO:0000076; GO:0006281; GO:0007049; GO:0007063; GO:0007064; GO:0009792; GO:0043111; GO:0048478; GO:0051177; GO:0051301; GO:0051321	GO:0003677	GO:0005634; GO:0031298	TRUE	2.88961	4.77793e-16	5.23242e-15	III	12240367	12250164	9798	-	673.95	799.31	672.972	129.001	60.6225	99.0092	8.84812	9.56812	9.59939	0.969297	0.453164	0.823757	1
WBGene00011200	R10E4.3.1	R10E4.3	protein_coding	protein_coding	WBGene00011200	0.4172	918			GO:0016020; GO:0016021	FALSE	2.88895	0.213437		III	4285861	4287472	1612	-	9.91099	0.651436	5.20339	2.06402	0	0	0.589929	0.0353544	0.336506	0.070313	0	0
WBGene00016339	C33C12.7.1	C33C12.7	protein_coding	protein_coding	WBGene00016339	0.4275	393				FALSE	2.88895	0.465853		II	2174586	2175289	704	-	0	1.30287	3.46893	0	0	0	0	0.165167	0.524025	0	0	0
WBGene00016825	C50E10.1.1	C50E10.1	protein_coding	protein_coding	WBGene00016825	0.4762	588				FALSE	2.88895	0.465853		II	12301077	12302429	1353	-	0	1.30287	3.46893	0	0	0	0	0.110392	0.350241	0	0	0
WBGene00018355	F42G2.6.1	ceh-86	protein_coding	protein_coding	WBGene00018355	0.4054	2336	GO:0006914	GO:0003677	GO:0005634	TRUE	2.88708	0.151962	0.209703	II	2426372	2429944	3573	-	0	20.846	19.0791	2.06402	0	3.22856	0	0.444593	0.48488	0.0276316	0	0.0478588
WBGene00016744	C48B6.8.1	bbs-9	protein_coding	protein_coding	WBGene00016744	0.3615	2235	GO:0015031; GO:0030030; GO:0060271		GO:0016020; GO:0034464; GO:0036064	TRUE	2.8802	0.000220966	0.000612289	I	6917750	6922955	5206	-	64.9721	140.71	553.294	42.3124	35.5828	24.7523	1.58845	3.13662	14.697	0.592045	0.49532	0.383499
WBGene00013586	Y80D3A.8.1	Y80D3A.8	protein_coding	protein_coding	WBGene00013586	0.3992	3828	GO:0006470; GO:0035335	GO:0004725	GO:0016020; GO:0016021	FALSE	2.87661	0.367826		V	18940641	18946905	6265	+	5.57053	0	3.46893	0	0	1.07619	0.0795152	0	0.0537988	0	0	0.00973512
WBGene00015541	C06E7.4a.1; C06E7.4b.1	C06E7.4	protein_coding	protein_coding	WBGene00015541	0.4394	1352				TRUE	2.87376	2.16374e-13	1.90356e-12	IV	5850826	5859976	9151	-	1112.78	635.151	1028.54	140.353	80.3908	157.123	44.9738	23.4053	45.164	3.24646	1.84992	4.02429	1
WBGene00006767	ZK897.1a.1; ZK897.1b.1; ZK897.1c.1; ZK897.1d.1; ZK897.1e.1; ZK897.1f.1; ZK897.1g.1; ZK897.1h.1; ZK897.1i.1; ZK897.1j.1; ZK897.1k.1; ZK897.1l.1; ZK897.1m.1; ZK897.1n.1; ZK897.1o.1; ZK897.1p.1; ZK897.1q.1; ZK897.1r.1; ZK897.1s.1	unc-31	protein_coding	protein_coding	WBGene00006767	0.4285	3547	GO:0001820; GO:0006887; GO:0006937; GO:0007419; GO:0007626; GO:0007635; GO:0015031; GO:0018991; GO:0030536; GO:0071244; GO:0090325; GO:1902075; GO:1903745; GO:1903998; GO:1905488; GO:1990504	GO:0005509; GO:0005546; GO:0008289; GO:0046872	GO:0016020; GO:0030054; GO:0030424; GO:0030659; GO:0031045; GO:0031410; GO:0043025; GO:0045202; GO:0098793	TRUE	2.86983	0.000501121	0.00129422	IV	12773862	12787513	13652	+	110.673	31.269	58.9718	7.22406	3.95365	16.1428	1.70492	0.439203	0.987034	0.0636921	0.0346785	0.157595
WBGene00019395	K04F10.2.1	K04F10.2	protein_coding	protein_coding	WBGene00019395	0.3634	1819	GO:0044458		GO:0005737; GO:0005856; GO:0042995; GO:0097546	TRUE	2.86545	0.000139333	0.000400933	I	6360844	6364172	3329	+	205.378	110.744	376.379	13.4161	65.8941	16.1428	6.16945	3.03321	12.284	0.230653	1.12703	0.307307
WBGene00006440	Y47G6A.28.1	tag-63	protein_coding	protein_coding	WBGene00006440	0.4287	2118				TRUE	2.86091	4.90815e-10	3.05449e-09	I	3439108	3449175	10068	+	332.018	204.551	173.446	31.9923	23.7219	41.9713	8.56567	4.8116	4.8617	0.472372	0.348455	0.686202	1
WBGene00010542	K03H1.7.1	K03H1.7	protein_coding	protein_coding	WBGene00010542	0.4045	665				TRUE	2.85849	6.95915e-05	0.000211974	III	9947405	9948172	768	+	84.228	61.6463	36.7757	9.08467	3.40367	11.5651	6.92087	4.61848	3.28313	0.427221	0.159239	0.602219
WBGene00020163	T02G5.3.1	T02G5.3	protein_coding	protein_coding	WBGene00020163	0.3528	1658				TRUE	2.85501	0.00018338	0.000515445	II	7094159	7099348	5190	+	53.9599	92.504	270.576	16.5121	30.3113	10.7619	1.77833	2.77965	9.68846	0.311447	0.568778	0.224765
WBGene00009115	F25F2.1a.1; F25F2.1b.1	F25F2.1	protein_coding	protein_coding	WBGene00009115	0.4218	1842	GO:0006468; GO:0007165; GO:0016310; GO:0018105	GO:0004672; GO:0004674; GO:0005524; GO:0016301	GO:0005634; GO:0005737	FALSE	2.85494	0.461601		III	4508855	4512162	3308	+	0.550611	0.651436	3.46893	0	0	0	0.0163336	0.0176196	0.111803	0	0	0
WBGene00008593	F08H9.5.1	clec-227	protein_coding	protein_coding	WBGene00008593	0.4069	1187		GO:0030246		FALSE	2.85102	0.471888		V	14472529	14474374	1846	+	4.40489	0	0	0	0	0	0.202773	0	0	0	0	0
WBGene00011606	T08D2.1.1	T08D2.1	protein_coding	protein_coding	WBGene00011606	0.4306	504	GO:0006886; GO:0006888; GO:0007030		GO:0005783; GO:0005793; GO:0005794; GO:0016020; GO:0016021; GO:0030134	FALSE	2.85102	0.471888		X	162529	163134	606	-	4.14434	0	0	0	0	0	0.449315	0	0	0	0	0
WBGene00012490	Y19D2B.2.1	Y19D2B.2	protein_coding	protein_coding	WBGene00012490	0.3912	501				FALSE	2.85102	0.471888		II	10923716	10924595	880	+	4.40489	0	0	0	0	0	0.480422	0	0	0	0	0
WBGene00019989	R09F10.8.1	R09F10.8	protein_coding	protein_coding	WBGene00019989	0.4353	1252				FALSE	2.85102	0.471888		X	8325099	8326451	1353	-	4.40489	0	0	0	0	0	0.192245	0	0	0	0	0
WBGene00020978	W03B1.9.1	W03B1.9	protein_coding	protein_coding	WBGene00020978	0.4465	1962				FALSE	2.85102	0.471888		IV	4352618	4356979	4362	-	4.38851	0	0	0	0	0	0.12222	0	0	0	0	0
WBGene00020066	R13F6.5.1	dhhc-5	protein_coding	protein_coding	WBGene00020066	0.4192	749	GO:0006612; GO:0018230	GO:0016409; GO:0016740; GO:0016746; GO:0019706	GO:0005783; GO:0005794; GO:0016020; GO:0016021	FALSE	2.85089	0.182752		III	6847390	6849055	1666	-	2.20244	8.46867	5.20339	0	0	2.15237	0.160675	0.56331	0.412433	0	0	0.0995088
WBGene00020201	T04A6.2.1	T04A6.2	protein_coding	protein_coding	WBGene00020201	0.3842	570			GO:0016020; GO:0016021	TRUE	2.85084	2.18949e-06	8.56785e-06	III	7614862	7615699	838	+	80.9398	54.7207	88.4577	6.19205	13.1788	11.8381	7.75912	4.78289	9.21319	0.339723	0.719324	0.719169
WBGene00009287	F31C3.5.1	psf-2	protein_coding	protein_coding	WBGene00009287	0.4454	595	GO:0000727; GO:0006260		GO:0000811; GO:0005634	TRUE	2.84866	0.000267263	0.000727933	I	15053025	15053670	646	+	56.1623	71.0066	39.8927	2.06402	11.8609	9.68568	5.15767	5.94559	3.98039	0.108483	0.62019	0.563688
WBGene00006104	F37B4.12.1	str-39	protein_coding	protein_coding	WBGene00006104	0.3556	990			GO:0016020; GO:0016021	FALSE	2.84791	0.271346		V	2877804	2879901	2098	-	1.10122	5.86293	1.73446	0	0	1.07619	0.0607806	0.295048	0.104011	0	0	0.0376425
WBGene00006056	F32B6.5.1	sss-1	protein_coding	protein_coding	WBGene00006056	0.412	949				FALSE	2.84787	0.271854		IV	9892739	9893779	1041	-	1.10122	5.86293	1.73446	1.03201	0	0	0.0634065	0.307795	0.108505	0.0340081	0	0
WBGene00001110	F38B7.5.1	duo-1	protein_coding	protein_coding	WBGene00001110	0.3947	2825	GO:0016579	GO:0004843		TRUE	2.84738	1.10301e-08	5.86223e-08	V	11554635	11558127	3493	+	393.687	181.099	305.266	59.8565	26.3576	35.5142	7.61479	3.19383	6.41518	0.66261	0.290276	0.43532
WBGene00018330	F42A6.9.1	elks-1	protein_coding	protein_coding	WBGene00018330	0.499	2858	GO:0007274; GO:0008104; GO:0048167; GO:0048790; GO:0060625	GO:0030165; GO:0098882	GO:0005604; GO:0005737; GO:0048786; GO:0048788; GO:0110165	TRUE	2.83971	5.51928e-35	2.05878e-33	IV	3342519	3350027	7509	-	1583.56	1486.58	1425.73	181.634	205.59	241.066	30.2759	25.9143	29.6158	1.98746	2.23801	2.92078	1
WBGene00000427	R09F10.9.1	ced-13	protein_coding	protein_coding	WBGene00000427	0.3714	412	GO:0042771; GO:0043065	GO:0051400		FALSE	2.83798	0.473973		X	8299119	8299654	536	-	2.75305	0	1.73446	0	0	0	0.365126	0	0.249929	0	0	0
WBGene00044087	C45H4.18a.1; C45H4.18b.1	C45H4.18	protein_coding	protein_coding	WBGene00044087	0.3973	750			GO:0016020; GO:0016021	FALSE	2.83798	0.473973		V	2175542	2177503	1962	+	2.75305	0	1.73446	0	0	0	0.200576	0	0.137295	0	0	0
WBGene00077696	F58E6.12.1	marc-1	protein_coding	protein_coding	WBGene00077696	0.3733	659	GO:0000209; GO:0016567	GO:0004842; GO:0008270	GO:0016020; GO:0016021	FALSE	2.83798	0.473973		V	9739702	9740894	1193	+	2.75305	0	1.73446	0	0	0	0.228273	0	0.156253	0	0	0
WBGene00013480	Y69H2.2.1	egas-3	protein_coding	protein_coding	WBGene00013480	0.4509	2941	GO:0006811; GO:0006814; GO:0035725	GO:0005272; GO:0005509; GO:0015280	GO:0005887; GO:0016020; GO:0016021	TRUE	2.83713	0.0373173	0.0620233	V	18628680	18636348	7669	-	14.8665	9.77155	22.548	1.03201	0	5.38094	0.27621	0.165532	0.455159	0.0109737	0	0.0633561
WBGene00011489	T05F1.2.1	T05F1.2	protein_coding	protein_coding	WBGene00011489	0.4132	1958	GO:0009790			TRUE	2.83454	3.72447e-09	2.09521e-08	I	9622522	9624724	2203	+	224.099	225.397	317.407	49.5364	17.1325	39.8189	6.25391	5.73521	9.62394	0.791183	0.272226	0.70421
WBGene00015819	C16A11.6.1	fbxc-44	protein_coding	protein_coding	WBGene00015819	0.397	985				FALSE	2.83301	0.175323		II	4236504	4237751	1248	-	3.30366	5.21149	6.93786	2.06402	0	0	0.183267	0.263596	0.418156	0.0655303	0	0
WBGene00012500	Y26D4A.2.1	hpo-2	protein_coding	protein_coding	WBGene00012500	0.432	1685				TRUE	2.8305	0.0245167	0.0426728	I	13066924	13069038	2115	+	111.774	64.4922	112.74	38.1843	0	2.15237	3.62465	1.90687	3.97217	0.70868	0	0.0442327
WBGene00011562	T07C4.10.1	sas-7	protein_coding	protein_coding	WBGene00011562	0.4808	3230				TRUE	2.82695	5.01326e-18	6.33081e-17	III	10321019	10325675	4657	+	1276.87	1982.32	1184.64	185.762	254.351	187.257	21.6007	30.5763	21.7737	1.79853	2.44993	2.00752	1
WBGene00017143	EEED8.15.1	EEED8.15	protein_coding	protein_coding	WBGene00017143	0.3737	1322				TRUE	2.82479	0.0121815	0.022924	II	5419233	5421093	1861	+	19.822	25.406	46.8305	5.16004	7.90729	0	0.819297	0.957456	2.10304	0.122064	0.186088	0
WBGene00006625	ZC581.6.1	try-7	protein_coding	protein_coding	WBGene00006625	0.3745	1199	GO:0006508	GO:0004252		FALSE	2.82415	0.47619		I	6640662	6642643	1982	-	1.10122	0	3.46893	0	0	0	0.0501858	0	0.171761	0	0	0
WBGene00013747	Y113G7A.10.1	spe-19	protein_coding	protein_coding	WBGene00013747	0.428	965	GO:0007286		GO:0016020; GO:0016021	FALSE	2.82415	0.47619		V	20040927	20047398	6472	-	1.10122	0	3.46893	0	0	0	0.0623552	0	0.213411	0	0	0
WBGene00219452	F21D9.11a.1; F21D9.11b	F21D9.11	protein_coding	protein_coding	WBGene00219452	0.3905	686				FALSE	2.82415	0.47619		V	19252181	19253054	874	+	1.10122	0	3.46893	0	0	0	0.0876516	0	0.299988	0	0	0
WBGene00001935	F55G1.10.1	his-61	protein_coding	protein_coding	WBGene00001935	0.477	522		GO:0003677; GO:0046982	GO:0000786	TRUE	2.81637	1.28054e-09	7.61729e-09	IV	7485733	7486254	522	-	407.028	530.377	268.826	31.9923	71.5026	68.876	42.6068	50.6206	30.5739	1.91664	4.26162	4.56902
WBGene00206392	F47D2.11.1	F47D2.11	protein_coding	protein_coding	WBGene00206392	0.3634	897			GO:0016020; GO:0016021	FALSE	2.81044	0.475296		V	4294156	4296020	1865	-	0	8.46867	0	0	0	1.07619	0	0.470367	0	0	0	0.0415452
WBGene00019908	R05H11.2.1; R05H11.2.2; R05H11.2.3	R05H11.2	protein_coding	protein_coding	WBGene00019908	0.4311	664				TRUE	2.80899	2.73183e-46	2.16457e-44	III	6798299	6800489	2191	+	3006.33	2876.09	2733.51	405.58	449.398	375.589	247.137	215.571	244.143	19.0816	21.0343	19.5665	1
WBGene00001372	R09B3.1a.1; R09B3.1a.2; R09B3.1b.1	exo-3	protein_coding	protein_coding	WBGene00001372	0.4814	887	GO:0002119; GO:0006281; GO:0006284; GO:0006974; GO:0009792; GO:0090305	GO:0003824; GO:0003906; GO:0004518; GO:0004519; GO:0004527; GO:0008081; GO:0008311; GO:0046872	GO:0005634	TRUE	2.80695	1.89451e-09	1.10048e-08	I	11907571	11909280	1710	-	678.903	1197.34	768.368	189.89	64.5762	122.685	41.8083	67.2296	51.41	6.69262	2.26425	4.78793
WBGene00008863	F15D4.6.1	F15D4.6	protein_coding	protein_coding	WBGene00008863	0.4189	518				TRUE	2.80692	0.0147238	0.0271229	II	13249189	13249895	707	+	115.628	51.4635	38.1582	23.7362	0	5.38094	12.1972	4.94975	4.37328	1.433	0	0.359711
WBGene00009180	F26H11.2a.1; F26H11.2b.1; F26H11.2c.1; F26H11.2d.1; F26H11.2e.1; F26H11.2f.1; F26H11.2f.2; F26H11.2g.1; F26H11.2h.1; F26H11.2i.1; F26H11.2j.1; F26H11.2j.2; F26H11.2k.1; F26H11.2l.1; F26H11.2m.1; F26H11.2n.1; F26H11.2o.1; F26H11.2p.1	nurf-1	protein_coding	protein_coding	WBGene00009180	0.471	3673	GO:0006325; GO:0006357; GO:0045944	GO:0000978; GO:0035064; GO:0046872	GO:0005634; GO:0016589	TRUE	2.80319	5.61418e-21	8.49696e-20	II	14390718	14407905	17188	+	155646	201585	171899	19237.7	33780	22792.6	2315.49	2734.32	2778.45	163.793	286.129	214.881	1
WBGene00020935	W02D3.10.1	fnci-1	protein_coding	protein_coding	WBGene00020935	0.3741	4670	GO:0006281	GO:0070182		TRUE	2.80314	6.22123e-33	1.94884e-31	I	6745991	6753031	7041	-	3338.35	4012.2	3394.35	529.421	426.994	582.217	39.0608	42.8035	43.1508	3.54527	2.84464	4.31712	1
WBGene00011097	R07B7.13a.1; R07B7.13b.1	nhr-206	protein_coding	protein_coding	WBGene00011097	0.3493	1250	GO:0006355; GO:0006357; GO:0030154; GO:0030522; GO:0042594; GO:0048856	GO:0000978; GO:0003677; GO:0003700; GO:0004879; GO:0008270; GO:0043565; GO:0046872	GO:0005634	TRUE	2.80296	2.1341e-11	1.53815e-10	V	12092006	12093862	1857	+	544.554	614.956	676.441	54.6965	138.378	71.0284	23.8044	24.5102	32.1269	1.3684	3.44412	1.96765	1
WBGene00017902	F28E10.4.1	F28E10.4	protein_coding	protein_coding	WBGene00017902	0.4495	1039				FALSE	2.80079	0.397489		IV	4566018	4567443	1426	-	0.550611	7.81724	0	0	0	1.07619	0.0289571	0.374845	0	0	0	0.0358672
WBGene00004855	R31.1a.1; R31.1b.1; R31.1c.1; R31.1d.1	sma-1	protein_coding	protein_coding	WBGene00004855	0.4353	12900	GO:0002064; GO:0002119; GO:0007154; GO:0010171; GO:0010172; GO:0023052; GO:0035150; GO:0040012; GO:0040018; GO:0045793; GO:0046622; GO:0050790; GO:0050896; GO:0051693; GO:0060465; GO:1905905	GO:0003779; GO:0005085; GO:0005543	GO:0005634; GO:0005737; GO:0005874; GO:0016324; GO:0043229	TRUE	2.79912	8.43504e-23	1.48631e-21	V	11899072	11916623	17552	+	7500.98	7307.14	7078.35	733.759	1304.7	1107.4	31.7727	28.2209	32.5755	1.77881	3.14662	2.97262	1
WBGene00011532	T06D10.2.1	chaf-1	protein_coding	protein_coding	WBGene00011532	0.3792	1775	GO:0006334		GO:0005634; GO:0033186	TRUE	2.79806	2.60105e-13	2.26364e-12	I	9077565	9080024	2460	-	458.659	437.765	383.316	70.1766	35.5828	77.4855	14.1194	12.2873	12.8206	1.2364	0.623684	1.51164	1
WBGene00012955	Y47H9C.12.1	Y47H9C.12	protein_coding	protein_coding	WBGene00012955	0.4183	263				FALSE	2.79764	0.139606		I	11896674	11896982	309	+	2.20244	7.81724	5.20339	1.03201	0	1.07619	0.457588	1.48085	1.17457	0.122714	0	0.141696
WBGene00009999	F53F8.2.1	srsx-35	protein_coding	protein_coding	WBGene00009999	0.4045	942	GO:0007186	GO:0004930	GO:0016020; GO:0016021	FALSE	2.79736	0.480499		V	20681420	20683014	1595	+	1.65183	2.60575	0	0	0	0	0.0958166	0.137814	0	0	0	0
WBGene00012965	Y48A6B.4.1	fipr-17	protein_coding	protein_coding	WBGene00012965	0.432	206				FALSE	2.79736	0.480499		III	11007415	11007620	206	-	1.65183	2.60575	0	0	0	0	0.438151	0.6302	0	0	0	0
WBGene00019312	K02E7.7.1	K02E7.7	protein_coding	protein_coding	WBGene00019312	0.3508	630				TRUE	2.79445	0.0980931	0.143552	II	1055024	1055760	737	+	14.842	7.62539	37.9542	0	0	8.55019	1.2873	0.603025	3.57659	0	0	0.46996
WBGene00000875	K08E3.6.1; K08E3.6.2	cyk-4	protein_coding	protein_coding	WBGene00000875	0.4774	2316	GO:0000070; GO:0000281; GO:0007165; GO:0035556; GO:0040038; GO:0043547; GO:0051256; GO:1990386	GO:0005096; GO:0005515	GO:0005886; GO:0051233; GO:0097149; GO:1990023	TRUE	2.79435	3.25957e-17	3.88935e-16	III	13768541	13771242	2702	-	1850.6	2403.15	1444.81	285.867	201.636	333.618	43.6617	51.6959	37.0357	3.86002	2.70865	4.98812	1
WBGene00010228	F58A4.5.1	clec-161	protein_coding	protein_coding	WBGene00010228	0.4025	2678		GO:0030246; GO:0038023	GO:0005576	FALSE	2.79171	0.478287		III	9603030	9608688	5659	-	0	0	8.67232	0	0	1.07619	0	0	0.192253	0	0	0.0139156
WBGene00000971	E04F6.7.1	dhs-7	protein_coding	protein_coding	WBGene00000971	0.3503	1299	GO:2000377	GO:0016491	GO:0005737	FALSE	2.79171	0.478287		II	7206990	7208460	1471	-	0	0	8.67232	1.03201	0	0	0	0	0.396347	0.024845	0	0
WBGene00010010	F53H4.5.1	gmeb-2	protein_coding	protein_coding	WBGene00010010	0.3979	2028		GO:0003677; GO:0046872		TRUE	2.78843	0.000124919	0.000362381	X	15879096	15885617	6522	+	408.003	743.94	241.09	106.297	13.1788	81.7902	10.9931	18.2761	7.05767	1.63915	0.202177	1.39656
WBGene00007866	C32H11.3.1	C32H11.3	protein_coding	protein_coding	WBGene00007866	0.3982	1208				FALSE	2.78646	0.289963		IV	12918611	12920393	1783	+	7.15794	0	15.6102	0	0	3.22856	0.323777	0	0.767167	0	0	0.0925481
WBGene00015691	C10H11.1.1	viln-1	protein_coding	protein_coding	WBGene00015691	0.4101	3163	GO:0007010; GO:0008154; GO:0051014; GO:0051016	GO:0003779; GO:0005546; GO:0051015	GO:0005737; GO:0015629	TRUE	2.78236	2.6501e-21	4.09785e-20	I	4747490	4759601	12112	+	1144.17	1765.39	1198.51	174.41	213.497	209.856	19.7659	27.8071	22.4954	1.72439	2.09998	2.29746	1
WBGene00045357	F13A7.14.1	F13A7.14	protein_coding	protein_coding	WBGene00045357	0.4081	1137				TRUE	2.78093	0.00392324	0.00831493	V	16401891	16405325	3435	+	86.9965	102.276	74.5819	15.4801	0	22.5999	4.18087	4.48151	3.89424	0.425774	0	0.688291
WBGene00003224	C09G4.5.1	mes-6	protein_coding	protein_coding	WBGene00003224	0.4046	1683	GO:0000122; GO:0010468; GO:0016571; GO:0070734	GO:0005515; GO:0031491	GO:0000786; GO:0005634; GO:0031519; GO:0035098	TRUE	2.779	6.39578e-41	3.37113e-39	IV	8511284	8513476	2193	+	4404.72	5620.83	4827.79	766.846	692.033	705.081	143.008	166.391	170.3	14.2491	12.7928	14.5071	1
WBGene00013825	Y116F11B.9a.1; Y116F11B.9b	Y116F11B.9	protein_coding	protein_coding	WBGene00013825	0.3903	1655		GO:0016740; GO:0016757	GO:0016020; GO:0016021	FALSE	2.7768	0.0819498		V	19855174	19867983	12810	-	7.15794	5.21149	10.4068	1.03201	0	2.15237	0.236328	0.156884	0.373308	0.0195007	0	0.0450345
WBGene00003623	F11C1.6a.1; F11C1.6a.2; F11C1.6b.1; F11C1.6b.2	nhr-25	protein_coding	protein_coding	WBGene00003623	0.4102	2432	GO:0006355; GO:0006357; GO:0009755; GO:0009888; GO:0018996; GO:0030522; GO:0045944; GO:0110039	GO:0000978; GO:0003677; GO:0003700; GO:0004879; GO:0005515; GO:0008270; GO:0043565; GO:0046872; GO:0070016	GO:0005634; GO:0090575	TRUE	2.77554	3.40723e-16	3.78606e-15	X	13008493	13013962	5470	+	2007.53	1148.48	1751.81	285.867	179.232	250.752	45.105	23.5274	42.7634	3.67591	2.29285	3.57031	1
WBGene00002251	B0457.1a.1; B0457.1b.1; B0457.1c.1	lat-1	protein_coding	protein_coding	WBGene00002251	0.423	2673	GO:0007165; GO:0007186; GO:0007189; GO:0009792; GO:0009952; GO:0019953; GO:0097264	GO:0004175; GO:0004888; GO:0004930; GO:0030246	GO:0005886; GO:0005887; GO:0016020; GO:0016021	TRUE	2.76999	3.78454e-38	1.71194e-36	II	8896841	8908666	11826	+	2481.05	2350.38	2334.59	335.403	311.02	403.57	50.718	43.8079	51.8514	3.92403	3.62003	5.22812	1
WBGene00011453	T04H1.8.1	ugt-56	protein_coding	protein_coding	WBGene00011453	0.3571	1686		GO:0008194; GO:0015020; GO:0016740; GO:0016757	GO:0016020; GO:0016021; GO:0043231	TRUE	2.76939	0.108027	0.156036	V	12258982	12261205	2224	+	6.60733	20.846	1.73446	1.03201	0	3.22856	0.214138	0.615996	0.0610741	0.0191422	0	0.0663097
WBGene00003847	F25D7.3a.1; F25D7.3b.1	blmp-1	protein_coding	protein_coding	WBGene00003847	0.4106	3049	GO:0000122; GO:0006357; GO:0007568; GO:0008340; GO:0010468; GO:0040035; GO:0043053; GO:0045165; GO:0045684; GO:0045944; GO:0110039; GO:1903355	GO:0000978; GO:0000987; GO:0003700; GO:0005515; GO:0042826; GO:0046872	GO:0005634; GO:0005737	TRUE	2.76913	9.90145e-19	1.30757e-17	I	10409302	10414707	5406	+	1867.67	1782.33	1233.2	255.938	179.232	280.885	33.471	29.1235	24.0119	2.62508	1.82887	3.19005	1
WBGene00018595	F48C1.2.1	fbxa-145	protein_coding	protein_coding	WBGene00018595	0.3757	1150			GO:0016020; GO:0016021	FALSE	2.7668	0.0675735		I	5319720	5321117	1398	+	9.36038	5.21149	15.6102	1.03201	0	3.22856	0.444755	0.225776	0.805859	0.0280641	0	0.0972158
WBGene00010475	K01F9.2.1	K01F9.2	protein_coding	protein_coding	WBGene00010475	0.3861	966				TRUE	2.76658	0.00841586	0.016477	III	8870099	8877128	7030	-	132.147	38.4348	97.13	18.5762	0	20.4476	7.47488	1.98226	5.96933	0.601373	0	0.732976
WBGene00017237	F08B4.5.1	pole-2	protein_coding	protein_coding	WBGene00017237	0.3849	1899	GO:0006260; GO:0006261; GO:0042276	GO:0003677	GO:0005634; GO:0008622	TRUE	2.76553	1.08471e-21	1.73025e-20	IV	8682239	8686610	4372	-	1625.95	2068.96	1623.46	320.955	197.682	262.59	46.7852	54.2802	50.7534	5.28547	3.23866	4.78827	1
WBGene00012241	W04A8.6a.1; W04A8.6b.1	W04A8.6	protein_coding	protein_coding	WBGene00012241	0.449	1603				TRUE	2.76551	0.0845024	0.126363	I	13854632	13859699	5068	+	17.6195	28.0118	24.2825	0	10.5431	0	0.600602	0.870604	0.899309	0	0.204624	0
WBGene00005410	ZK697.11a.1; ZK697.11b	srh-199	protein_coding	protein_coding	WBGene00005410	0.355	936			GO:0016020; GO:0016021	FALSE	2.76486	0.485756		V	1750001	1751549	1549	-	2.20244	1.95431	0	0	0	0	0.128506	0.103968	0	0	0	0
WBGene00077577	R02D5.9.1	R02D5.9	protein_coding	protein_coding	WBGene00077577	0.4539	282			GO:0016020; GO:0016021	FALSE	2.76486	0.485756		V	14509738	14511123	1386	-	2.20244	1.95431	0	0	0	0	0.426757	0.345269	0	0	0	0
WBGene00019372	K03H9.3.1	K03H9.3	protein_coding	protein_coding	WBGene00019372	0.3871	1488				TRUE	2.75843	1.50934e-08	7.89373e-08	II	6423112	6424925	1814	+	1089.11	444.931	1304.32	91.8488	179.232	148.514	39.9939	14.8972	52.0391	1.93035	3.74745	3.45613
WBGene00021155	Y4C6B.1.1	Y4C6B.1	protein_coding	protein_coding	WBGene00021155	0.4205	1548				TRUE	2.75674	7.0821e-05	0.000215395	IV	5354488	5356539	2052	+	145.912	193.477	218.542	46.4404	5.27153	30.1332	5.15045	6.22689	8.38135	0.938188	0.105947	0.674063
WBGene00009444	F35G12.11.1; F35G12.11.2	erh-2	protein_coding	protein_coding	WBGene00009444	0.393	536	GO:0007049; GO:0007059; GO:0031047; GO:0051301; GO:0051781; GO:0051984; GO:1990511	GO:0005515	GO:0005634; GO:0005737; GO:0048471	TRUE	2.75367	3.86027e-18	4.9106e-17	III	4593176	4593832	657	+	1081.95	1233.82	870.701	203.306	121.245	147.438	110.298	114.684	96.4392	11.8618	7.03757	9.52509	1
WBGene00001170	F23B12.9.1	egl-1	protein_coding	protein_coding	WBGene00001170	0.4075	557	GO:0006915; GO:0008637; GO:0030042; GO:0031334; GO:0032091; GO:0040034; GO:0043065; GO:0043068; GO:0050829; GO:1902742; GO:1904747; GO:1905808	GO:0005515	GO:0005739; GO:0005829; GO:0030054; GO:0043231; GO:0045202; GO:0098793	TRUE	2.74915	0.00010292	0.000302913	V	14431310	14432359	1050	-	125.539	233.866	202.932	44.3764	5.27153	33.3618	12.3154	20.9182	21.6294	2.4915	0.294445	2.07405
WBGene00016872	C52B11.3.1	dop-4	protein_coding	protein_coding	WBGene00016872	0.445	1719	GO:0001963; GO:0007165; GO:0007186; GO:0007187; GO:0007191; GO:0007268; GO:0098664	GO:0004930; GO:0004952; GO:0004989; GO:0004993; GO:0030594	GO:0005886; GO:0005887; GO:0016020; GO:0016021; GO:0030425; GO:0045211	TRUE	2.74872	0.00517911	0.0106598	X	1295278	1298823	3546	+	29.1824	13.0287	26.017	2.06402	2.63576	5.38094	0.92762	0.377607	0.898524	0.0375494	0.0477039	0.108395
WBGene00012441	Y15E3A.2.1	glb-28	protein_coding	protein_coding	WBGene00012441	0.4616	769	GO:0015671	GO:0005344; GO:0019825; GO:0020037		FALSE	2.74533	0.151657		X	15314874	15317223	2350	-	4.40489	1.95431	8.67232	1.03201	0	1.07619	0.312992	0.126614	0.669512	0.0419684	0	0.0484604
WBGene00003675	W05B5.3a.1; W05B5.3b.1; W05B5.3b.2	nhr-85	protein_coding	protein_coding	WBGene00003675	0.4649	1563	GO:0000122; GO:0006355; GO:0009755; GO:0030154; GO:0030522; GO:0045944	GO:0000978; GO:0003677; GO:0003700; GO:0004879; GO:0008270; GO:0043565; GO:0046872	GO:0005634	TRUE	2.74199	3.90865e-16	4.32736e-15	I	13055664	13062122	6459	-	643.664	594.424	510.189	58.8245	98.8411	104.39	22.5022	18.9474	19.3786	1.17697	1.96744	2.31274	1
WBGene00020100	R148.1a.1; R148.1b.1	mks-1	protein_coding	protein_coding	WBGene00020100	0.4128	1464				TRUE	2.73705	0.0444779	0.0725032	III	3186700	3192206	5507	+	12.664	11.0744	84.9887	4.12804	0	11.8381	0.472669	0.376872	3.44643	0.0881794	0	0.280004
WBGene00194710	C30B5.9.1	mks-2	protein_coding	protein_coding	WBGene00194710	0.3492	504	GO:1904491; GO:1905515		GO:0016020; GO:0016021; GO:0035869	TRUE	2.73682	0.0158683	0.0290329	II	6218687	6219511	825	-	19.2714	37.1319	43.3616	0	5.27153	9.68568	2.08933	3.67054	5.10768	0	0.325409	0.665465
WBGene00010974	R01H10.6.1	bbs-5	protein_coding	protein_coding	WBGene00010974	0.4648	1123	GO:0015031; GO:0030030; GO:0046907; GO:0060271	GO:0032266	GO:0005737; GO:0005815; GO:0005856; GO:0005886; GO:0005929; GO:0005930; GO:0016020; GO:0034464; GO:0036064; GO:0042995; GO:0060170; GO:0097546; GO:0097730	TRUE	2.73122	0.0177262	0.0320404	III	10258856	10261679	2824	-	75.4337	51.4635	329.548	6.19205	60.6226	2.15237	3.67038	2.28314	17.4216	0.172433	1.67949	0.0663687
WBGene00009899	F49E12.6.1	efl-3	protein_coding	protein_coding	WBGene00009899	0.4107	2184	GO:0006355; GO:0006357; GO:0010629	GO:0000978; GO:0000981; GO:0003677	GO:0005634; GO:0005667; GO:0090575	TRUE	2.72693	3.95557e-11	2.77187e-10	II	8412671	8416857	4187	+	868.313	694.431	962.627	94.9448	200.318	87.1712	21.7245	15.8413	26.1671	1.35951	2.85358	1.38212	1
WBGene00018845	F54H12.5.1	F54H12.5	protein_coding	protein_coding	WBGene00018845	0.3198	1235	GO:0008150; GO:0009790	GO:0003674	GO:0005575	TRUE	2.72675	2.41001e-06	9.38231e-06	III	7970263	7972161	1899	-	142.058	67.098	126.616	16.5121	23.7219	10.7619	6.28526	2.7068	6.08654	0.41812	0.597592	0.301749
WBGene00007273	C03C10.7.1	C03C10.7	protein_coding	protein_coding	WBGene00007273	0.4168	571				FALSE	2.72572	0.243833		III	4096045	4096915	871	+	3.30366	11.7259	0	1.03201	1.31788	0	0.316144	1.02311	0	0.0565213	0.0718064	0
WBGene00006532	F32H2.9.1	tba-6	protein_coding	protein_coding	WBGene00006532	0.4049	1504	GO:0000226; GO:0000278; GO:0007017	GO:0000166; GO:0003924; GO:0005200; GO:0005525	GO:0005737; GO:0005874	TRUE	2.72315	0.0152543	0.0280109	I	8994002	8998593	4592	+	91.952	109.441	362.503	52.6325	0	32.2856	3.34071	3.62533	14.3091	1.09439	0	0.743339
WBGene00014141	ZK899.2.1	ZK899.2	protein_coding	protein_coding	WBGene00014141	0.4328	1421			GO:0016020; GO:0016021	TRUE	2.72117	7.78399e-08	3.7402e-07	X	9450225	9451994	1770	-	85.3447	153.088	104.068	14.4481	17.1325	20.4476	3.28177	5.36734	4.34782	0.317967	0.375102	0.498279
WBGene00002073	F26B1.3.1	ima-2	protein_coding	protein_coding	WBGene00002073	0.4458	1808	GO:0006606; GO:0006607; GO:0007084; GO:0009792; GO:0015031; GO:0051983	GO:0005515; GO:0008139; GO:0061608	GO:0005634; GO:0005635; GO:0005643; GO:0005654; GO:0005737	TRUE	2.71896	4.83419e-28	1.15591e-26	I	6315233	6317267	2035	+	1737.73	1598.63	1283.5	244.586	250.398	207.704	52.5181	44.0516	42.1452	4.23056	4.30878	3.97807	1
WBGene00194680	Y17D7C.6a.1; Y17D7C.6b	Y17D7C.6	protein_coding	protein_coding	WBGene00194680	0.42	395				TRUE	2.71809	5.52856e-12	4.24194e-11	V	18709810	18711696	1887	+	171.24	239.077	287.92	34.0563	31.6292	39.8189	23.6583	30.1165	43.219	2.69287	2.48808	3.48633	1
WBGene00001432	B0511.1.1	fkb-7	protein_coding	protein_coding	WBGene00001432	0.3537	1439	GO:0000413	GO:0003755; GO:0016853		TRUE	2.71471	1.52294e-29	3.99625e-28	I	10667808	10671301	3494	+	4218.78	4803.04	4755.9	557.285	731.424	810.369	160.196	166.291	196.21	12.111	15.8136	19.5006	1
WBGene00005387	Y60A3A.5.1	srh-171	protein_coding	protein_coding	WBGene00005387	0.4306	936			GO:0016020; GO:0016021	FALSE	2.7138	0.162939		V	19965700	19972559	6860	+	3.30366	9.12011	8.67232	3.09603	0	0	0.192862	0.485442	0.550058	0.103441	0	0
WBGene00015242	B0524.3.1	B0524.3	protein_coding	protein_coding	WBGene00015242	0.4539	1692				FALSE	2.71362	0.48598		III	1887558	1889691	2134	+	1.10122	1.30287	1.73446	0	0	0	0.0355631	0.0383632	0.0608575	0	0	0
WBGene00009541	F38E11.4.1	cutl-17	protein_coding	protein_coding	WBGene00009541	0.3701	2988			GO:0016020; GO:0016021	TRUE	2.70801	3.00378e-07	1.34224e-06	IV	9449473	9457501	8029	-	189.961	227.351	447.492	25.8002	44.808	61.3427	3.47383	3.7908	8.89106	0.270027	0.46655	0.710899
WBGene00002018	Y46H3A.2.1	hsp-16.41	protein_coding	protein_coding	WBGene00002018	0.3469	640	GO:0009408; GO:0030968; GO:0036498; GO:0042026; GO:0050829	GO:0044183; GO:0051082	GO:0005634; GO:0005737	TRUE	2.70698	1.5782e-14	1.54046e-13	V	1805178	1805875	698	+	107008	119618	72792.1	10330.5	20408.3	15118.4	9136.11	9311.73	6752.33	504.785	992.088	817.996	1
WBGene00012941	Y47D3B.4.1	Y47D3B.4	protein_coding	protein_coding	WBGene00012941	0.3735	1700		GO:0016740; GO:0016757	GO:0016020; GO:0016021	TRUE	2.70663	2.20638e-10	1.42504e-09	III	11405361	11409425	4065	+	472.975	512.68	848.153	68.1126	76.4371	135.6	15.2025	15.0249	29.6193	1.25298	1.39887	2.76207	1
WBGene00019431	K06A5.3.1	K06A5.3	protein_coding	protein_coding	WBGene00019431	0.3898	567			GO:0005856	FALSE	2.69617	0.493698		I	6466752	6467515	764	+	0	7.81724	0	1.03201	0	0	0	0.686885	0	0.05692	0	0
WBGene00022730	ZK402.3.1	ZK402.3	protein_coding	protein_coding	WBGene00022730	0.4192	396				TRUE	2.69189	1.81669e-13	1.61228e-12	X	1402217	1402860	644	+	321.34	528.791	468.317	52.4859	83.1985	68.3441	44.3399	66.5276	70.2092	4.14488	6.53647	5.97629	1
WBGene00004312	K07A1.11.1	rba-1	protein_coding	protein_coding	WBGene00004312	0.414	1343	GO:0001708; GO:0006325; GO:0010468; GO:0045138; GO:0050767	GO:0005515; GO:0042393	GO:0005634; GO:0016581; GO:0035098	TRUE	2.69174	2.20109e-27	5.09233e-26	I	9616508	9618107	1600	-	2760.21	2975.11	3245.18	547.997	369.007	471.37	112.303	110.367	143.454	12.7605	8.54834	12.1538	1
WBGene00010785	K12D12.1.1	top-2	protein_coding	protein_coding	WBGene00010785	0.4669	4860	GO:0000070; GO:0000712; GO:0000819; GO:0006259; GO:0006265; GO:0007049; GO:0051301; GO:0051306; GO:0051321	GO:0000166; GO:0003677; GO:0003916; GO:0003918; GO:0005515; GO:0005524; GO:0016853; GO:0046872	GO:0005634; GO:0005654; GO:0005694; GO:0005737; GO:0005819; GO:0005856	TRUE	2.68687	5.85849e-21	8.84465e-20	II	11875145	11880588	5444	+	4738.55	5831.12	4571.7	859.442	565.446	925.208	53.2763	59.7763	55.8458	5.53025	3.61975	6.59217	1
WBGene00010329	F59D12.1.1	F59D12.1	protein_coding	protein_coding	WBGene00010329	0.4034	1641	GO:0007186	GO:0004930	GO:0005887; GO:0016020; GO:0016021	TRUE	2.68681	0.00643074	0.0129501	X	15666761	15672363	5603	+	93.0532	114.653	78.0509	26.8322	0	17.219	3.09848	3.48088	2.8237	0.511344	0	0.36335
WBGene00006940	Y53C12A.1.1	wee-1.3	protein_coding	protein_coding	WBGene00006940	0.4197	2404	GO:0001556; GO:0002119; GO:0006468; GO:0007049; GO:0007283; GO:0009792; GO:0016310; GO:0030154; GO:0045736; GO:0048477; GO:0051078; GO:0051321; GO:0060280; GO:0071901; GO:1904145	GO:0000166; GO:0004672; GO:0004674; GO:0004712; GO:0004861; GO:0005524; GO:0016301; GO:0016740; GO:0046872; GO:0106310	GO:0000139; GO:0000793; GO:0005634; GO:0005635; GO:0005737; GO:0005794; GO:0005886; GO:0016020; GO:0019898; GO:0097038	TRUE	2.68672	1.42025e-07	6.58922e-07	II	9713737	9716467	2731	-	409.654	242.334	223.746	69.1446	42.1722	24.7523	9.31127	5.0222	5.52548	0.899474	0.545777	0.356539
WBGene00017992	F32E10.5.1	F32E10.5	protein_coding	protein_coding	WBGene00017992	0.3926	1745				TRUE	2.68559	1.56158e-25	3.18168e-24	IV	7574355	7578381	4027	-	848.381	1063.31	849.608	145.889	125.736	157.932	26.5657	30.3583	28.905	2.61452	2.24175	3.134	1
WBGene00019536	K08D12.2.1	rpi-2	protein_coding	protein_coding	WBGene00019536	0.5175	1026	GO:0000902; GO:0006892; GO:0043547; GO:0097499	GO:0000166; GO:0005096; GO:0005525	GO:0005929; GO:1990075	TRUE	2.67978	0.208672	0.275004	IV	1711279	1714179	2901	+	0	7.1658	36.4237	0	1.31788	5.38094	0	0.347961	2.10759	0	0.0399625	0.181608
WBGene00001936	F55G1.3.1	his-62	protein_coding	protein_coding	WBGene00001936	0.5203	444		GO:0003677; GO:0046982	GO:0000786	TRUE	2.67969	3.05141e-13	2.63854e-12	IV	7486519	7486962	444	+	354.717	304.634	231.86	39.2163	57.9868	42.9119	43.6541	34.183	31.0021	2.76216	4.06321	3.34673	1
WBGene00014069	ZK678.3.1	ZK678.3	protein_coding	protein_coding	WBGene00014069	0.4187	492				FALSE	2.67859	0.139505		X	15748483	15749206	724	-	1.02328	10.6053	10.8391	1.83136	1.83854	0	0.113646	1.07392	1.30791	0.116406	0.11626	0
WBGene00022690	ZK250.7.1	math-49	protein_coding	protein_coding	WBGene00022690	0.3868	1272				FALSE	2.67758	0.414154		II	1953680	1955668	1989	-	2.75305	0	5.20339	1.03201	0	0	0.118264	0	0.242856	0.0253724	0	0
WBGene00304203	D1086.21.1	D1086.21	protein_coding	protein_coding	WBGene00304203	0.3813	619				FALSE	2.67651	0.139744		V	14064722	14066235	1514	+	6.05672	1.30287	13.8757	2.06402	0	1.07619	0.534653	0.104864	1.3308	0.104277	0	0.0602036
WBGene00007080	AH6.2.1	sfxn-1.1	protein_coding	protein_coding	WBGene00007080	0.4201	1045	GO:0006811; GO:0006865; GO:0055085; GO:0140300; GO:1990542	GO:0015075; GO:0022857; GO:0022889	GO:0005739; GO:0005743; GO:0016020; GO:0016021; GO:0031305	FALSE	2.67258	0.500847		II	9517567	9518876	1310	-	0	3.90862	0	0	0	0	0	0.186346	0	0	0	0
WBGene00008812	F14F7.5a.1; F14F7.5b.1	F14F7.5	protein_coding	protein_coding	WBGene00008812	0.4004	2775			GO:0016020; GO:0016021	FALSE	2.67258	0.500847		III	13032001	13036344	4344	+	0	3.90862	0	0	0	0	0	0.0701736	0	0	0	0
WBGene00017629	F20B6.5.1	F20B6.5	protein_coding	protein_coding	WBGene00017629	0.505	897				FALSE	2.67258	0.500847		X	4198791	4199929	1139	-	0	3.90862	0	0	0	0	0	0.217092	0	0	0	0
WBGene00021447	Y39A3CR.8a.1; Y39A3CR.8b.1	Y39A3CR.8	protein_coding	protein_coding	WBGene00021447	0.3892	746				FALSE	2.67258	0.500847		III	1881158	1883017	1860	-	0	3.90862	0	0	0	0	0	0.26086	0	0	0	0
WBGene00021570	Y45G12C.7.1	srd-73	protein_coding	protein_coding	WBGene00021570	0.4066	1023				FALSE	2.67258	0.500847		V	2527360	2529862	2503	+	0	4.03048	0	0	0	0	0	0.196288	0	0	0	0
WBGene00077563	Y39G10AR.25.1; Y39G10AR.25.2	peel-1	protein_coding	protein_coding	WBGene00077563	0.365	646			GO:0016020; GO:0016021	FALSE	2.67258	0.500847		I	2352835	2356238	3404	+	0	3.90862	0	0	0	0	0	0.301209	0	0	0	0
WBGene00194917	Y45F10B.59.1	Y45F10B.59	protein_coding	protein_coding	WBGene00194917	0.4378	201				FALSE	2.67258	0.500847		IV	13602674	13603264	591	+	0	3.90862	0	0	0	0	0	0.968815	0	0	0	0
WBGene00019144	H01M10.2.1	H01M10.2	protein_coding	protein_coding	WBGene00019144	0.4112	783				FALSE	2.67057	0.355123		X	2584539	2585739	1201	-	4.9555	0	8.67232	2.06402	0	0	0.345821	0	0.657541	0.0824359	0	0
WBGene00004371	Y42H9B.2.1; Y42H9B.2.2	rig-4	protein_coding	protein_coding	WBGene00004371	0.4078	7506	GO:0007155		GO:0016020; GO:0016021	TRUE	2.66482	2.34641e-10	1.51145e-09	IV	7991410	8004136	12727	-	3560.25	6195.81	3350.98	404.548	948.874	714.588	25.9177	41.1247	26.5041	1.68549	3.93299	3.29665	1
WBGene00021576	Y46B2A.1.1	fbxc-51	protein_coding	protein_coding	WBGene00021576	0.4507	1644				TRUE	2.66329	0.0255816	0.0443218	II	868814	871699	2886	+	25.8787	33.8747	29.4859	2.06402	0	11.8381	0.860134	1.02657	1.06478	0.0392624	0	0.249347
WBGene00017184	F02G3.1a.1; F02G3.1b.1; F02G3.1c.1	ncam-1	protein_coding	protein_coding	WBGene00017184	0.4227	3271	GO:0007155; GO:0007156; GO:0007411; GO:0048468; GO:0070593	GO:0098632	GO:0005886; GO:0016020; GO:0016021; GO:0030424	TRUE	2.66322	3.80045e-06	1.43217e-05	X	692978	703036	10059	+	2613.75	2106.09	3108.15	109.393	604.908	521.95	43.6626	32.0783	56.412	1.04586	5.75349	5.52553
WBGene00006644	F59G1.2.1	tsp-18	protein_coding	protein_coding	WBGene00006644	0.365	1463			GO:0005887; GO:0016020; GO:0016021	FALSE	2.66309	0.502412		II	5904552	5906308	1757	+	3.85428	0	0	0	0	0	0.143954	0	0	0	0	0
WBGene00012596	Y38E10A.18.1	nhr-234	protein_coding	protein_coding	WBGene00012596	0.4655	1074	GO:0006355	GO:0003677; GO:0003700; GO:0005515; GO:0008270; GO:0043565; GO:0046872	GO:0005634	FALSE	2.66309	0.502412		II	12636699	12638448	1750	+	3.85428	0	0	0	0	0	0.196094	0	0	0	0	0
WBGene00017542	F17E9.5.1	F17E9.5	protein_coding	protein_coding	WBGene00017542	0.4883	596		GO:0005515	GO:0016020; GO:0016021	FALSE	2.66309	0.502412		IV	8345818	8346546	729	+	3.85428	0	0	0	0	0	0.353364	0	0	0	0	0
WBGene00018241	F40G9.5.1	F40G9.5	protein_coding	protein_coding	WBGene00018241	0.3802	981			GO:0016020; GO:0016021	TRUE	2.66244	0.0355729	0.0593845	III	183231	184915	1685	+	12.1134	10.423	19.0791	3.09603	0	3.22856	0.674721	0.529342	1.15462	0.0986962	0	0.113963
WBGene00015310	C01G5.8a.1; C01G5.8b.1	fan-1	protein_coding	protein_coding	WBGene00015310	0.3836	2085	GO:0006281; GO:0006974; GO:0036297; GO:0090304; GO:0090305	GO:0003676; GO:0004518; GO:0004528; GO:0005515; GO:0008409; GO:0016787; GO:0016788; GO:0017108; GO:0046872; GO:0070336	GO:0005634	TRUE	2.66177	2.8099e-09	1.60228e-08	IV	6548818	6552511	3694	+	888.684	827.973	1156.89	198.146	68.5298	186.181	23.2898	19.7844	32.9408	2.97197	1.02258	3.09211
WBGene00007313	C04H5.2.1	clec-147	protein_coding	protein_coding	WBGene00007313	0.445	854		GO:0030246		TRUE	2.65431	0.138293	0.193281	II	14535923	14537579	1657	-	11.0122	7.81724	8.67232	0	0	4.30475	0.7046	0.456046	0.602874	0	0	0.174548
WBGene00255704	B0348.10.1	B0348.10	protein_coding	protein_coding	WBGene00255704	0.5152	165				TRUE	2.64809	0.187656	0.251654	V	8575	8739	165	-	13.2147	16.9373	0	1.03201	3.95364	0	4.3762	5.11417	0	0.195598	0.745481	0
WBGene00007310	C04G2.11.1	irld-21	protein_coding	protein_coding	WBGene00007310	0.3017	1455				FALSE	2.64671	0.424686		IV	10119460	10122305	2846	-	0	2.60575	5.20339	1.03201	0	0	0	0.0892242	0.212311	0.0221812	0	0
WBGene00012698	Y39B6A.40a.1; Y39B6A.40b.1; Y39B6A.40c.1; Y39B6A.40d.1; Y39B6A.40d.2	sws-1	protein_coding	protein_coding	WBGene00012698	0.4025	601		GO:0008270		TRUE	2.646	7.85222e-05	0.000236444	V	18979336	18981193	1858	-	86.4462	99.6699	78.051	22.7042	3.95364	15.0666	7.8517	8.2541	7.70229	1.18022	0.204462	0.867229
WBGene00008365	D1046.4.1	D1046.4	protein_coding	protein_coding	WBGene00008365	0.3656	1707	GO:0055085	GO:0022857	GO:0016020; GO:0016021	TRUE	2.6452	1.48291e-05	5.09993e-05	IV	8933997	8937400	3404	+	166.284	635.802	182.119	49.5364	61.9404	46.276	5.32284	18.5567	6.33389	0.90752	1.12892	0.938746
WBGene00007131	B0284.1.1	pals-26	protein_coding	protein_coding	WBGene00007131	0.4221	1663				TRUE	2.64492	6.65696e-09	3.64345e-08	III	4376503	4379200	2698	+	201.524	262.529	159.571	45.4084	32.947	21.5237	6.62154	7.86499	5.69653	0.853903	0.616378	0.448179
WBGene00006379	T23D8.9a.1; T23D8.9a.2; T23D8.9b.1; T23D8.9b.2; T23D8.9c.1	sys-1	protein_coding	protein_coding	WBGene00006379	0.3958	2454	GO:0007501; GO:0008406; GO:0008584; GO:0008585; GO:0009786; GO:0009792; GO:0009954; GO:0010085; GO:0035262; GO:0045892; GO:0045944; GO:0048337; GO:0048566	GO:0003713; GO:0005515; GO:0061629; GO:0097110	GO:0000242; GO:0005634; GO:0005737; GO:0005813	TRUE	2.64399	2.12119e-15	2.17925e-14	I	9980064	9984848	4785	-	707.535	1282.02	1011.19	134.161	180.55	165.733	15.7543	26.0277	24.4629	1.70969	2.289	2.33862	1
WBGene00003864	C09G9.6.1	oma-1	protein_coding	protein_coding	WBGene00003864	0.4409	1801	GO:0001555; GO:0001556; GO:0006417; GO:0017148; GO:0031648; GO:0040019; GO:0042661; GO:0042662; GO:0042664; GO:0043282; GO:0043406; GO:0045167; GO:0048601; GO:0051078; GO:0051151; GO:0051303; GO:0060280; GO:0060282; GO:0061031; GO:0071168; GO:1900195; GO:1903224; GO:1904145; GO:1904146; GO:1905516	GO:0000900; GO:0003723; GO:0003730; GO:0005515; GO:0035925; GO:0046872	GO:0005634; GO:0005737; GO:0005813; GO:0005829; GO:0036464; GO:0043186; GO:1990124	FALSE	2.64398	0.43547		IV	8888976	8890999	2024	+	0	5.86293	1.73446	1.03201	0	0	0	0.162186	0.0571743	0.0179199	0	0
WBGene00005517	F28D9.2a.1; F28D9.2b.1	sri-5	protein_coding	protein_coding	WBGene00005517	0.432	989			GO:0016020; GO:0016021	FALSE	2.64238	0.505837		I	11182817	11186137	3321	+	2.20244	0	1.73446	0	0	0	0.121623	0	0.104064	0	0	0
WBGene00012877	Y45F10C.1.1	Y45F10C.1	protein_coding	protein_coding	WBGene00012877	0.4138	1938				FALSE	2.64238	0.505837		IV	13656413	13659547	3135	-	2.20244	0	1.73446	0	0	0	0.0620978	0	0.0531326	0	0	0
WBGene00016328	C32E12.2.1	pde-5	protein_coding	protein_coding	WBGene00016328	0.401	2187	GO:0006935; GO:0007165; GO:0007602; GO:0007635; GO:0008340; GO:0010446; GO:0010628; GO:0010754; GO:0032528; GO:0042542	GO:0004114; GO:0004118; GO:0008081; GO:0016787; GO:0046872; GO:0047555		FALSE	2.64238	0.505837		I	5196078	5200102	4025	+	2.20244	0	1.73446	0	0	0	0.0550277	0	0.0470832	0	0	0
WBGene00001440	F40H3.4a.1; F40H3.4a.2; F40H3.4b.1; F40H3.4b.2	fkh-8	protein_coding	protein_coding	WBGene00001440	0.3877	1082	GO:0006355; GO:0006357; GO:0009653; GO:0030154	GO:0000978; GO:0000981; GO:0003677; GO:0003700; GO:0043565	GO:0005634	TRUE	2.63822	0.00852095	0.0166558	II	6189580	6191402	1823	-	45.7007	33.8747	81.5197	1.03201	19.7683	5.38094	2.30792	1.55977	4.47285	0.0298278	0.568414	0.172209
WBGene00001735	K02D7.6.1	grl-26	protein_coding	protein_coding	WBGene00001735	0.4318	704				FALSE	2.63712	0.506709		IV	321571	323022	1452	-	0.550611	3.25718	0	0	0	0	0.0427364	0.230506	0	0	0	0
WBGene00195182	C17G10.10.1	C17G10.10	protein_coding	protein_coding	WBGene00195182	0.3733	450				FALSE	2.63712	0.506709		II	5598453	5599374	922	-	0.550611	3.25718	0	0	0	0	0.0668587	0.360614	0	0	0	0
WBGene00013150	Y53F4B.3.1	pole-4	protein_coding	protein_coding	WBGene00013150	0.4619	617		GO:0005515; GO:0046982	GO:0005634; GO:0008622	TRUE	2.63466	0.00376173	0.00801045	II	14968633	14969354	722	-	100.762	98.3669	32.9548	16.5121	1.31788	19.3714	8.92352	7.94287	3.1709	0.836918	0.066453	1.08718
WBGene00006575	F13B10.1a.1; F13B10.1b.1; F13B10.1c.1; F13B10.1d.1; F13B10.1e.1; F13B10.1f.1; F13B10.1g.1; F13B10.1h.1; F13B10.1h.2	tir-1	protein_coding	protein_coding	WBGene00006575	0.4142	2892	GO:0002376; GO:0006796; GO:0007165; GO:0007399; GO:0008104; GO:0010628; GO:0010629; GO:0019677; GO:0030154; GO:0034128; GO:0034655; GO:0042427; GO:0042742; GO:0044249; GO:0044281; GO:0045087; GO:0045168; GO:0045944; GO:0048678; GO:0050829; GO:0050832; GO:0140367; GO:1901214; GO:1901216; GO:1901565; GO:1901576; GO:1902097	GO:0003953; GO:0005515; GO:0016787; GO:0016798; GO:0019901; GO:0031267; GO:0035591; GO:0042802; GO:0043539; GO:0050135; GO:0061809	GO:0005737; GO:0030424; GO:0030425; GO:0044297; GO:1904115	TRUE	2.634	1.74236e-13	1.55085e-12	III	3869591	3901466	31876	-	7895.21	11899.8	6384.56	987.632	1507.66	1722.98	149.173	205.001	131.064	10.6798	16.2191	20.6303	1
WBGene00015671	C10B5.3.1	C10B5.3	protein_coding	protein_coding	WBGene00015671	0.421	772				TRUE	2.63127	8.69192e-08	4.15342e-07	V	8583553	8584554	1002	-	175.094	158.299	116.209	27.8642	13.1788	31.2094	12.3931	10.2159	8.93659	1.12874	0.531107	1.39989
WBGene00003981	F18G5.2.1	pes-8	protein_coding	protein_coding	WBGene00003981	0.4431	1625			GO:0016020; GO:0016021	TRUE	2.63083	0.23125	0.299962	X	9251818	9255717	3900	+	59.466	720.489	65.9096	3.09603	0	133.447	1.99959	22.0896	2.40793	0.0595822	0	2.84369
WBGene00002992	F36H1.4a.1; F36H1.4b.1; F36H1.4b.2; F36H1.4c.1; F36H1.4d.1; F36H1.4d.2; F36H1.4e.1; F36H1.4f.1; F36H1.4f.2; F36H1.4g.1; F36H1.4h.1; F36H1.4h.2	lin-3	protein_coding	protein_coding	WBGene00002992	0.4048	1781	GO:0002119; GO:0007173; GO:0009791; GO:0018991; GO:0030431; GO:0030539; GO:0030728; GO:0031129; GO:0040025; GO:0040026; GO:0042659; GO:0060279	GO:0005154; GO:0008083	GO:0005615; GO:0005886; GO:0016020; GO:0016021	TRUE	2.62935	5.24082e-22	8.64415e-21	IV	11054308	11063613	9306	+	6394.79	4039.56	4245.97	757.495	799.955	815.749	196.195	113.001	141.534	13.3009	13.9741	15.8606	1
WBGene00000242	F20D12.3.1	bbs-2	protein_coding	protein_coding	WBGene00000242	0.35	2263	GO:0015031; GO:0030030; GO:0060271; GO:1905515		GO:0005737; GO:0005856; GO:0005929; GO:0016020; GO:0031514; GO:0034464; GO:0036064; GO:0042995; GO:0043005	TRUE	2.62853	0.00499497	0.0103229	IV	7934097	7937746	3650	+	75.9843	82.081	402.396	6.19205	61.9404	22.5999	1.8347	1.80706	10.5565	0.0855687	0.851555	0.345818
WBGene00020160	T02C5.3a.1; T02C5.3b.1	igcm-3	protein_coding	protein_coding	WBGene00020160	0.4496	2646	GO:0098609	GO:0050839	GO:0005887; GO:0005911; GO:0016020; GO:0016021	TRUE	2.62647	1.70887e-14	1.66266e-13	X	2698257	2705859	7603	-	1959.07	1097.67	2235.72	296.187	297.841	262.59	40.4563	20.6678	50.1623	3.50058	3.50202	3.43648	1
WBGene00017095	E02C12.10.1	E02C12.10	protein_coding	protein_coding	WBGene00017095	0.3469	1254				FALSE	2.62641	0.318815		V	9376812	9378404	1593	-	4.40489	1.49988	1.73446	0	0	1.40295	0.191939	0.0595899	0.082114	0	0	0.0387409
WBGene00015111	B0281.4.1	B0281.4	protein_coding	protein_coding	WBGene00015111	0.4555	696				FALSE	2.62401	0.302739		II	2297847	2298793	947	-	2.20244	1.95431	3.46893	1.03201	0	0	0.17291	0.139894	0.295893	0.0463702	0	0
WBGene00021101	W08F4.12a.1; W08F4.12b.1; W08F4.12c; W08F4.12d	W08F4.12	protein_coding	protein_coding	WBGene00021101	0.4774	688				TRUE	2.62314	0.0018564	0.00423188	II	582111	584403	2293	-	115.495	59.7849	34.7847	3.27471	19.7682	12.0297	9.16614	4.32615	2.99939	0.148742	0.893278	0.60503
WBGene00012064	T26H2.2a.1; T26H2.2b.1	fbxb-115	protein_coding	protein_coding	WBGene00012064	0.405	1028			GO:0016020; GO:0016021	TRUE	2.62028	0.134307	0.188341	V	19238421	19239849	1429	-	7.15794	10.423	36.4237	0	0	8.6095	0.38047	0.505141	2.10349	0	0	0.290008
WBGene00011297	R102.10.1	R102.10	protein_coding	protein_coding	WBGene00011297	0.4126	1098				FALSE	2.6199	0.509569		IV	10705463	10707313	1851	+	0.550611	0	3.46893	0	0	0	0.0274011	0	0.187561	0	0	0
WBGene00021807	Y53G8AM.7.1	Y53G8AM.7	protein_coding	protein_coding	WBGene00021807	0.4256	759				FALSE	2.61529	0.194729		III	3263682	3266608	2927	-	9.36038	1.95431	12.1412	0	3.95364	0	0.673872	0.128282	0.949666	0	0.162061	0
WBGene00018531	F47B3.7.1	F47B3.7	protein_coding	protein_coding	WBGene00018531	0.4279	1248	GO:0006470; GO:0035335	GO:0004725		TRUE	2.61235	0.172985	0.234837	I	3968118	3970474	2357	-	3.5357	6.70693	17.9245	0	0	4.15	0.154806	0.267746	0.85267	0	0	0.115149
WBGene00003882	F59E10.1.1	orc-2	protein_coding	protein_coding	WBGene00003882	0.3935	1916	GO:0006260	GO:0003688	GO:0000228; GO:0000808; GO:0005634; GO:0005664	TRUE	2.60491	1.90658e-23	3.50735e-22	II	10873931	10877934	4004	+	1293.38	1307.43	1306.05	269.354	185.821	186.18	36.8857	33.9968	40.4682	4.39636	3.01733	3.36484	1
WBGene00010617	K07A1.13.1	K07A1.13	protein_coding	protein_coding	WBGene00010617	0.3862	725			GO:0016020; GO:0016021	TRUE	2.60353	9.10928e-08	4.34942e-07	I	9583869	9584817	949	-	1679.36	1147.83	2599.96	389.067	141.013	361.599	126.57	78.8776	212.901	16.7823	6.05125	17.2709
WBGene00185002	K11H3.8a.1; K11H3.8b.1	K11H3.8	protein_coding	protein_coding	WBGene00185002	0.4014	948				FALSE	2.60304	0.176881		III	9835192	9838311	3120	+	2.75305	14.3316	8.67231	4.12804	0	0	0.1586	0.752785	0.542809	0.136104	0	0
WBGene00007117	B0240.2.1	spe-42	protein_coding	protein_coding	WBGene00007117	0.36	2325	GO:0007338		GO:0016020; GO:0016021	FALSE	2.60084	0.512744		V	11733733	11736968	3236	-	1.10122	2.60575	0	0	0	0	0.0258808	0.0558371	0	0	0	0
WBGene00044001	C09G4.4.1	C09G4.4	protein_coding	protein_coding	WBGene00044001	0.3769	605				TRUE	2.59764	2.05767e-20	3.00906e-19	IV	8513205	8513916	712	+	1281.44	1494.16	1081.53	221.819	168.544	246.268	115.736	123.043	106.129	11.4659	8.66724	14.0954	1
WBGene00019641	K10G6.4.1	K10G6.4	protein_coding	protein_coding	WBGene00019641	0.406	1389				TRUE	2.59515	0.0125345	0.0235065	II	3972820	3974968	2149	-	22.0244	23.4517	145.695	5.16004	21.0861	5.38094	0.866419	0.841174	6.22718	0.116176	0.472299	0.134147
WBGene00016671	C45G7.4.1	C45G7.4	protein_coding	protein_coding	WBGene00016671	0.467	1923	GO:0016567	GO:0046872; GO:0061630		TRUE	2.59384	7.37196e-05	0.000223147	IV	2432993	2436472	3480	+	167.386	99.0183	143.96	15.4801	43.4901	9.68568	4.75625	2.56537	4.4444	0.251745	0.703614	0.174412
WBGene00000422	F08F1.5.1	ced-8	protein_coding	protein_coding	WBGene00000422	0.3779	1572	GO:0006915; GO:0009792; GO:0012501; GO:0043652; GO:0070782; GO:0097194; GO:1902742	GO:0017128	GO:0005886; GO:0016020; GO:0016021	TRUE	2.59327	0.0331795	0.0558816	X	8414015	8416919	2905	-	15.4171	65.1436	36.4237	4.12804	0	15.0666	0.53589	2.06459	1.37557	0.0821213	0	0.331886
WBGene00015586	C08A9.6.1	lido-1	protein_coding	protein_coding	WBGene00015586	0.4047	1238			GO:0005634	TRUE	2.59203	6.64867e-06	2.40818e-05	X	17094288	17096537	2250	-	129.944	71.0066	112.74	9.28808	23.7219	19.3714	5.73537	2.85753	5.40639	0.234623	0.596144	0.541833
WBGene00003367	M106.1.1	mix-1	protein_coding	protein_coding	WBGene00003367	0.4099	4028	GO:0000070; GO:0007049; GO:0007076; GO:0009792; GO:0030261; GO:0042464; GO:0051276; GO:0051301; GO:0051321; GO:0110039	GO:0000166; GO:0003682; GO:0005515; GO:0005524; GO:0016887	GO:0000775; GO:0000785; GO:0000793; GO:0000796; GO:0005634; GO:0005694; GO:0046536	TRUE	2.58994	7.03039e-37	3.01164e-35	II	10824294	10841424	17131	+	14053.8	17253.9	15336.1	2861.76	2525.06	2360.08	190.647	213.409	226.035	22.2182	19.5032	20.2891	1
WBGene00019146	H02F09.3.1	H02F09.3	protein_coding	protein_coding	WBGene00019146	0.4765	3828			GO:0016020; GO:0016021	TRUE	2.58904	0.277589	0.350215	X	1568678	1572854	4177	+	12.1134	0	46.8305	0	0	9.68568	0.17291	0	0.726284	0	0	0.0876161
WBGene00010281	F58G11.3a.1; F58G11.3b	F58G11.3	protein_coding	protein_coding	WBGene00010281	0.446	2140				TRUE	2.58702	0.0106224	0.0202667	V	13669353	13671958	2606	-	36.3403	40.3891	32.9548	7.22406	0	10.7619	0.927898	0.940294	0.914228	0.105568	0	0.17414
WBGene00018446	F45C12.15.1; F45C12.15.2; F45C12.15.3	ceh-83	protein_coding	protein_coding	WBGene00018446	0.4459	1815	GO:0006357; GO:0048856	GO:0000978; GO:0000981; GO:0003677	GO:0005634	TRUE	2.58622	6.4146e-13	5.36883e-12	II	1733718	1736533	2816	-	665.691	616.259	520.339	82.5607	143.649	75.3331	20.0411	16.9161	17.02	1.42253	2.46235	1.43726	1
WBGene00021553	Y44E3B.2.1	tyr-5	protein_coding	protein_coding	WBGene00021553	0.4271	1578		GO:0016491		FALSE	2.58572	0.328813		I	3259871	3264254	4384	+	1.10122	1.30287	5.20339	0	0	1.07619	0.0381323	0.0411347	0.195762	0	0	0.023616
WBGene00302974	Y65B4BM.3.1	Y65B4BM.3	protein_coding	protein_coding	WBGene00302974	0.5081	1242				TRUE	2.58533	4.0469e-07	1.78208e-06	I	531725	533084	1360	+	276.957	199.904	142.226	29.9283	52.3009	21.5237	12.1847	8.01886	6.7984	0.753572	1.31012	0.600097
WBGene00194896	W02H5.11a.1; W02H5.11b.1	W02H5.11	protein_coding	protein_coding	WBGene00194896	0.4292	936			GO:0016020; GO:0016021	TRUE	2.58429	0.00430455	0.00904247	V	2631754	2638476	6723	-	75.4337	147.189	12.1412	10.3201	11.8609	17.3813	4.40132	7.83033	0.76967	0.34462	0.394035	0.642687
WBGene00002225	M01E11.6.1; M01E11.6.2	klp-15	protein_coding	protein_coding	WBGene00002225	0.4852	2108	GO:0007018; GO:0007059; GO:0090307	GO:0000166; GO:0003774; GO:0003777; GO:0005524; GO:0008017; GO:0008569; GO:0016887	GO:0005634; GO:0005815; GO:0005871; GO:0005874; GO:0072686	TRUE	2.58307	1.5884e-11	1.15653e-10	I	5577055	5579394	2340	-	1009.47	1550.81	958.413	176.806	274.809	136.197	26.1667	36.6524	26.9918	2.62295	4.05587	2.23729	1
WBGene00020859	T27C10.4.1	bath-25	protein_coding	protein_coding	WBGene00020859	0.3835	897				FALSE	2.5811	0.440296		I	10876209	10877695	1487	+	0	3.90862	3.46893	0	0	1.07619	0	0.217092	0.22959	0	0	0.0415452
WBGene00002229	Y43F4B.6.1	klp-19	protein_coding	protein_coding	WBGene00002229	0.479	3597	GO:0007017; GO:0007018; GO:0010032; GO:0051257	GO:0000166; GO:0003774; GO:0003777; GO:0005524; GO:0008017; GO:0016887	GO:0000794; GO:0005654; GO:0005694; GO:0005819; GO:0005871; GO:0005874	TRUE	2.58014	1.52876e-23	2.82088e-22	III	13302743	13307259	4517	-	6841.34	8602.22	5650.88	1070.19	1324.47	1134.3	103.926	119.147	93.2664	9.30436	11.4558	10.9198	1
WBGene00007247	C01G12.7.1	C01G12.7	protein_coding	protein_coding	WBGene00007247	0.4461	1966			GO:0016020; GO:0016021	FALSE	2.58011	0.447677		II	14588621	14591893	3273	-	5.50611	0	1.73446	0	0	1.07619	0.153034	0	0.0523758	0	0	0.0189553
WBGene00006938	F35H8.7.1	wee-1.1	protein_coding	protein_coding	WBGene00006938	0.3465	1616	GO:0006468; GO:0007049; GO:0016310; GO:0018108; GO:0030154; GO:0051301; GO:0051321	GO:0000166; GO:0004672; GO:0004674; GO:0004712; GO:0004713; GO:0005524; GO:0016301; GO:0016740; GO:0046872; GO:0106310	GO:0005634	TRUE	2.57875	0.116813	0.16678	II	9581756	9583548	1793	-	6.05672	9.12011	5.20339	0	1.31788	2.15237	0.204796	0.281172	0.191159	0	0.0253722	0.0461213
WBGene00022175	Y71H2AM.10.1	Y71H2AM.10	protein_coding	protein_coding	WBGene00022175	0.4222	3077			GO:0016020; GO:0016021	TRUE	2.57818	2.37138e-08	1.21557e-07	III	2707737	2716447	8711	-	1634.76	1887.21	1661.62	136.225	475.755	257.209	29.0304	30.5567	32.0592	1.38451	4.81038	2.89457
WBGene00194664	K09E9.7.1; K09E9.7.2	K09E9.7	protein_coding	protein_coding	WBGene00194664	0.4276	474				TRUE	2.57766	1.57832e-11	1.14988e-10	X	15640903	15642853	1951	+	937.14	555.675	1252.28	131.065	171.324	157.124	107.918	58.3443	156.681	8.63805	11.2333	11.4665	1
WBGene00020412	T10E9.2.1	T10E9.2	protein_coding	protein_coding	WBGene00020412	0.37	2330				TRUE	2.57711	1.49763e-20	2.20336e-19	I	6542090	6544966	2877	+	2079.11	2312.6	2299.9	480.916	349.239	290.571	48.758	49.4491	58.6006	6.45473	4.66326	4.31838	1
WBGene00020853	T27B7.7a.1; T27B7.7b	fbxa-137	protein_coding	protein_coding	WBGene00020853	0.392	701				TRUE	2.57595	4.67526e-13	3.97741e-12	V	2278826	2281387	2562	+	227.953	189.568	258.436	41.2804	39.5364	32.2856	17.7686	13.4729	21.8869	1.84158	1.7547	1.59484	1
WBGene00006592	R151.5a.1; R151.5b	dpy-31	protein_coding	protein_coding	WBGene00006592	0.4169	1844	GO:0006508; GO:0018996; GO:0042338	GO:0004222; GO:0008233; GO:0008237; GO:0008270; GO:0016787; GO:0046872	GO:0005576	TRUE	2.57541	3.14945e-12	2.47285e-11	III	7202661	7207664	5004	+	946.5	592.156	690.317	120.745	86.9802	165.733	28.0469	15.9988	22.2247	2.04773	1.46752	3.11224	1
WBGene00007801	C29E6.2a.1; C29E6.2b.1	trpa-1	protein_coding	protein_coding	WBGene00007801	0.3813	3725	GO:0006811; GO:0034220; GO:0050896; GO:0055085	GO:0005216	GO:0005886; GO:0016020; GO:0016021; GO:0043025; GO:0097730	TRUE	2.57404	2.16287e-09	1.248e-08	IV	11864532	11875738	11207	+	760.944	1018.84	778.774	70.1766	173.961	186.18	11.1623	13.6268	12.4118	0.589156	1.45294	1.73075
WBGene00019438	K06B9.1.1	cyp-25A6	protein_coding	protein_coding	WBGene00019438	0.3466	753		GO:0004497; GO:0005506; GO:0016705; GO:0020037	GO:0016020; GO:0016021	FALSE	2.57206	0.514107		IV	4197467	4198365	899	+	0	7.1658	0	0	0	1.44739	0	0.474115	0	0	0	0.0665602
WBGene00044763	ZK688.12.1	ZK688.12	protein_coding	protein_coding	WBGene00044763	0.3442	642				FALSE	2.56708	0.460731		III	7912698	7913600	903	-	0.550611	0	6.93786	1.03201	0	0	0.0468636	0	0.641563	0.0502705	0	0
WBGene00001882	F45F2.12.1	his-8	protein_coding	protein_coding	WBGene00001882	0.458	559		GO:0003677; GO:0046982	GO:0000786	TRUE	2.5665	4.15726e-12	3.22447e-11	V	8532540	8533098	559	-	623.495	741.96	397.348	84.7461	89.5543	123.564	60.9462	66.1275	42.1996	4.74103	4.98423	7.65427	1
WBGene00015797	C15F1.8.1	C15F1.8	protein_coding	protein_coding	WBGene00015797	0.3964	1216				TRUE	2.56526	0.0531959	0.0845318	II	6976031	6977790	1760	-	8.2177	22.5013	13.8757	2.22257	0	5.38094	0.369269	0.921907	0.67744	0.0571592	0	0.153232
WBGene00219314	C05B5.17.1	C05B5.17	protein_coding	protein_coding	WBGene00219314	0.3989	564			GO:0016020; GO:0016021	FALSE	2.56386	0.188143		III	9998542	9999335	794	-	0.550611	162.859	5.20339	0	27.6755	1.07619	0.0533447	14.3862	0.547718	0	1.52665	0.0660746
WBGene00011438	T04F3.3.1	T04F3.3	protein_coding	protein_coding	WBGene00011438	0.4021	1129	GO:0006470; GO:0035335	GO:0004725		FALSE	2.56371	0.518959		V	11758935	11760570	1636	+	1.65183	1.95431	0	0	0	0	0.0799461	0.0862408	0	0	0	0
WBGene00019858	R03H10.6.1	R03H10.6	protein_coding	protein_coding	WBGene00019858	0.3846	1880		GO:0003677; GO:0003690		TRUE	2.56211	0.000243332	0.000669067	II	4171294	4173875	2582	-	83.1422	116.607	58.9718	7.22406	27.6755	9.68568	2.41651	3.09016	1.86224	0.120168	0.457995	0.178401
WBGene00008556	F07D3.3.1	F07D3.3	protein_coding	protein_coding	WBGene00008556	0.3756	852		GO:0003676		FALSE	2.55179	0.344381		V	9460686	9462705	2020	-	0.550611	3.25718	3.46893	0	0	1.07619	0.0353127	0.190465	0.241716	0	0	0.0437395
WBGene00017132	EEED8.1.1; EEED8.1.2	tofu-6	protein_coding	protein_coding	WBGene00017132	0.429	1194	GO:0006260; GO:0007049; GO:0007059; GO:0009792; GO:0031047; GO:0040016; GO:0051301; GO:0051306; GO:0051781; GO:0051984; GO:1990511	GO:0003674; GO:0003676; GO:0003723; GO:0005515	GO:0005634; GO:0005737; GO:0048471	TRUE	2.5514	4.1603e-14	3.90065e-13	II	5421248	5422737	1490	+	349.087	450.794	324.345	69.1446	73.8014	49.5046	15.9755	18.8099	16.1269	1.811	1.92302	1.43571	1
WBGene00000659	K12D12.3.1	col-84	protein_coding	protein_coding	WBGene00000659	0.5449	1057	GO:0030198	GO:0005201; GO:0042302	GO:0005615; GO:0031012	TRUE	2.54498	0.020328	0.0361344	II	11868535	11869688	1154	+	8.80977	54.0692	31.2203	7.22406	7.90729	1.07619	0.455423	2.54852	1.75353	0.213733	0.232743	0.0352564
WBGene00018026	F35A5.4.1	F35A5.4	protein_coding	protein_coding	WBGene00018026	0.4591	1712				TRUE	2.5449	0.00265487	0.00585287	X	3789757	3792815	3059	-	51.2068	266.438	43.3616	17.5442	13.1788	31.2094	1.63437	7.75363	1.50366	0.320474	0.239495	0.631259
WBGene00007213	C01A2.1a.1; C01A2.1b.1; C01A2.1c.1	C01A2.1	protein_coding	protein_coding	WBGene00007213	0.3843	643			GO:0016020; GO:0016021	TRUE	2.5445	2.29312e-12	1.82411e-11	I	13409933	13411451	1519	-	557.769	633.197	461.367	81.5287	133.106	69.9522	47.3474	49.0082	42.5513	3.96088	6.43336	3.76308	1
WBGene00004984	ZC404.8.1; ZC404.8.2	spn-4	protein_coding	protein_coding	WBGene00004984	0.4242	1532	GO:0000381; GO:0007399	GO:0003676; GO:0003723; GO:0003729; GO:0005515	GO:0005634; GO:0005737; GO:0043186	TRUE	2.5434	5.93391e-05	0.000182952	V	6783187	6784922	1736	-	98.5593	114.002	62.4407	26.8322	10.5431	9.68568	3.51532	3.70737	2.41968	0.547725	0.214107	0.218926
WBGene00011600	T07G12.10.1; T07G12.10.2; T07G12.10.3; T07G12.10.4	zim-2	protein_coding	protein_coding	WBGene00011600	0.3773	2028	GO:0045132		GO:0000794	FALSE	2.54325	0.162284		IV	10555247	10558221	2975	+	0	30.9679	9.45505	1.03201	2.63577	3.22856	0	0.760776	0.276787	0.015914	0.0404354	0.0551272
WBGene00044744	F10G7.12.1	F10G7.12	protein_coding	protein_coding	WBGene00044744	0.3914	511				FALSE	2.54051	0.446343		II	4689777	4690484	708	+	1.10122	5.86293	0	1.03201	0	0	0.117755	0.57162	0	0.0631579	0	0
WBGene00010152	F56D5.9.1	F56D5.9	protein_coding	protein_coding	WBGene00010152	0.3433	3399			GO:0016020; GO:0016021	FALSE	2.53777	0.523323		IV	9418432	9422506	4075	-	0	1.95431	1.73446	0	0	0	0	0.0286455	0.0302945	0	0	0
WBGene00010249	F58D12.1.1	F58D12.1	protein_coding	protein_coding	WBGene00010249	0.4593	405			GO:0016020; GO:0016021	FALSE	2.53777	0.523323		V	14049574	14054663	5090	+	0	1.95431	1.73446	0	0	0	0	0.24041	0.254249	0	0	0
WBGene00015971	C18E3.2.1; C18E3.2.2	swsn-2.2	protein_coding	protein_coding	WBGene00015971	0.4408	1468	GO:0006325; GO:0006357	GO:0003712; GO:0061629	GO:0000793; GO:0005634; GO:0005635; GO:0005654; GO:0005694; GO:0016514	TRUE	2.53756	9.77336e-23	1.7097e-21	I	4210979	4212667	1689	+	758.742	929.597	849.887	130.033	135.742	171.114	28.2419	31.5488	34.3704	2.77008	2.87681	4.03631	1
WBGene00001947	W09H1.2.1	his-73	protein_coding	protein_coding	WBGene00001947	0.5127	355		GO:0003677; GO:0046982	GO:0000786	TRUE	2.53752	0.139736	0.195028	II	13183450	13183845	396	+	15.2858	13.4472	9.21791	0	0	6.45712	2.3528	1.8872	1.54154	0	0	0.629849
WBGene00007643	C17E4.3.1	marc-3	protein_coding	protein_coding	WBGene00007643	0.4212	1503	GO:0000209; GO:0016567	GO:0004842; GO:0008270; GO:0046872	GO:0016020; GO:0016021	TRUE	2.53663	0.000325363	0.000871686	I	9416704	9418884	2181	-	40.7452	80.7781	55.5028	5.16004	9.22517	16.1428	1.4813	2.67762	2.19233	0.107364	0.190958	0.371917
WBGene00022357	Y92C3B.1.1	kbp-4	protein_coding	protein_coding	WBGene00022357	0.4056	355		GO:0005515	GO:0000776; GO:0031262	TRUE	2.53585	0.0040199	0.00849454	III	1080901	1081300	400	+	24.2269	22.8003	19.0791	3.09603	5.27153	3.22856	3.72902	3.19982	3.19065	0.272735	0.461989	0.314924
WBGene00001892	K06C4.10.1	his-18	protein_coding	protein_coding	WBGene00001892	0.4789	451		GO:0003677; GO:0046982		TRUE	2.53208	4.82768e-07	2.10298e-06	V	8898195	8898645	451	+	627.994	826.171	262.527	66.6149	119.04	111.496	76.0859	91.2656	34.5578	4.61913	8.21181	8.5607
WBGene00001051	C09G4.3.1	cks-1	protein_coding	protein_coding	WBGene00001051	0.3882	693	GO:0007049; GO:0007346; GO:0009794; GO:0045737; GO:0050790; GO:0051301	GO:0016538; GO:0019901; GO:0042393; GO:0043130; GO:0061575	GO:0000307; GO:0005634; GO:0019005	TRUE	2.52771	4.37841e-06	1.63121e-05	IV	8513919	8514725	807	+	509.866	485.32	393.723	102.169	25.0398	113	40.202	34.8906	33.7293	4.61052	1.12414	5.64637
WBGene00219383	Y61B8A.6.1	Y61B8A.6	protein_coding	protein_coding	WBGene00219383	0.4135	341				FALSE	2.52568	0.525363		V	17251911	17252309	399	+	2.20244	1.30287	0	0	0	0	0.35292	0.190354	0	0	0	0
WBGene00012649	Y39A1A.10.1	Y39A1A.10	protein_coding	protein_coding	WBGene00012649	0.5238	357				TRUE	2.52313	0.0129777	0.0242566	III	10632728	10633084	357	+	23.1257	65.1436	12.1412	10.3201	3.95364	3.22856	3.53958	9.09112	2.01904	0.904024	0.34455	0.31316
WBGene00004976	K01A11.4a.1; K01A11.4b.1	spe-41	protein_coding	protein_coding	WBGene00004976	0.4311	2440	GO:0006816; GO:0006828; GO:0006874; GO:0007338; GO:0051480; GO:0070588	GO:0005262; GO:0015279; GO:0070679	GO:0005887; GO:0016020; GO:0016021; GO:0031260; GO:0031410; GO:0034703	TRUE	2.52166	0.0221471	0.0390319	III	3439023	3444207	5185	-	109.572	52.1149	43.3616	25.8002	0	9.68568	2.45377	1.06411	1.05503	0.330673	0	0.137457
WBGene00020663	T21H3.4a.1; T21H3.4b.1; T21H3.4c.1; T21H3.4c.2	cutl-22	protein_coding	protein_coding	WBGene00020663	0.3783	638			GO:0016020; GO:0016021	TRUE	2.52079	0.00265904	0.00586101	V	1141770	1146498	4729	+	38.5428	21.4974	24.2825	3.09603	5.27153	6.45712	3.30102	1.67872	2.25955	0.151757	0.257063	0.350464
WBGene00010061	F54E12.2.1; F54E12.2.2	F54E12.2	protein_coding	protein_coding	WBGene00010061	0.4218	3475		GO:0000166; GO:0005524		TRUE	2.52054	3.40137e-16	3.78301e-15	IV	11333079	11337184	4106	-	481.234	604.533	601.859	77.4007	94.8875	121.609	7.56705	8.6672	10.2823	0.696554	0.849527	1.21182	1
WBGene00013158	Y53F4B.11a.1; Y53F4B.11b.1	Y53F4B.11	protein_coding	protein_coding	WBGene00013158	0.4917	762		GO:0005515		FALSE	2.52024	0.319885		II	15010748	15013408	2661	+	0.550611	9.77156	1.73446	2.06402	0	0	0.0394576	0.638466	0.135044	0.0846522	0	0
WBGene00017122	E04F6.2.1	pcrg-1	protein_coding	protein_coding	WBGene00017122	0.3816	912	GO:0060548	GO:0030544; GO:0051087; GO:0051879		FALSE	2.51763	0.169226		II	7200611	7201880	1270	+	1.10122	19.5431	5.20339	0	1.31788	3.22856	0.0659789	1.06761	0.33872	0	0.0449578	0.122586
WBGene00007580	C14B1.9.1	C14B1.9	protein_coding	protein_coding	WBGene00007580	0.4028	1276				TRUE	2.51655	0.0151701	0.0278689	III	3725075	3726500	1426	-	15.9677	23.4517	29.4859	8.25607	1.31788	2.15237	0.683782	0.915667	1.37187	0.202343	0.0321328	0.0584107
WBGene00004038	T01E8.3.1	plc-3	protein_coding	protein_coding	WBGene00004038	0.4057	4427	GO:0006629; GO:0007165; GO:0009395; GO:0010634; GO:0016042; GO:0030431; GO:0035556	GO:0004435; GO:0008081; GO:0016787; GO:0046872		TRUE	2.51539	3.16175e-06	1.20762e-05	II	10222877	10229440	6564	+	529.137	704.203	561.966	104.233	36.9007	172.19	6.53107	7.92505	7.53616	0.736309	0.259327	1.34686
WBGene00001253	F52C12.5.1; F52C12.5.2	elt-6	protein_coding	protein_coding	WBGene00001253	0.477	1468	GO:0000122; GO:0006355; GO:0006357; GO:0009888; GO:0045165; GO:0045944	GO:0000977; GO:0000978; GO:0000981; GO:0003700; GO:0008270; GO:0043565	GO:0005634	TRUE	2.51497	3.35054e-10	2.11886e-09	IV	1917854	1921644	3791	+	682.207	403.239	886.312	102.169	98.8411	143.133	25.3931	13.6852	35.8434	2.17649	2.09476	3.37628	1
WBGene00044333	C01G12.13.1	C01G12.13	protein_coding	protein_coding	WBGene00044333	0.4219	839				FALSE	2.51314	0.465505		II	14576957	14578075	1119	+	0	5.21149	1.73446	0	0	1.07619	0	0.309466	0.122731	0	0	0.0444172
WBGene00164985	ZK1010.10.1; ZK1010.10.2	ZK1010.10	protein_coding	protein_coding	WBGene00164985	0.4686	646		GO:0046872		TRUE	2.51309	1.16767e-06	4.79365e-06	III	13002383	13005311	2929	+	138.754	119.864	123.147	29.9283	26.3576	10.7619	11.7274	9.23707	11.3085	1.4477	1.26841	0.576428
WBGene00044153	W04G3.11.1	W04G3.11	protein_coding	protein_coding	WBGene00044153	0.4092	391				TRUE	2.51167	0.0759639	0.115316	X	11089243	11090679	1437	+	10.4616	16.2859	10.4068	1.03201	0	5.38094	1.462	2.07515	1.58012	0.0825413	0	0.476548
WBGene00000301	T13F2.8a.1; T13F2.8b.1	cav-1	protein_coding	protein_coding	WBGene00000301	0.4401	830	GO:0007265; GO:0046662; GO:0051321; GO:0070836	GO:0060090	GO:0000139; GO:0005794; GO:0005886; GO:0005887; GO:0005901; GO:0005938; GO:0009898; GO:0016020; GO:0016021; GO:0030133; GO:0045121; GO:0048471; GO:0060473	FALSE	2.51143	0.201901		IV	9772510	9773470	961	+	1.10122	1.95431	17.3446	0	1.31788	2.15237	0.0724537	0.117238	1.23987	0	0.0493696	0.0897437
WBGene00011099	R07B7.15.1	nhr-208	protein_coding	protein_coding	WBGene00011099	0.3471	1285	GO:0006355; GO:0006357; GO:0030154; GO:0030522; GO:0042594; GO:0048856	GO:0000978; GO:0003677; GO:0003700; GO:0004879; GO:0008270; GO:0043565; GO:0046872	GO:0005634	TRUE	2.51076	3.50132e-05	0.00011271	V	12094374	12095947	1574	+	142.058	99.6698	176.915	24.7682	9.22517	38.7427	6.04069	3.86433	8.17357	0.602777	0.223354	1.04403
WBGene00304215	F17A2.16.1	F17A2.16	protein_coding	protein_coding	WBGene00304215	0.4314	969				FALSE	2.50957	0.190394		X	12308449	12309548	1100	+	5.01786	4.04771	2.78475	1.30237	0	1.33369	0.282957	0.208113	0.170613	0.0420317	0	0.0476602
WBGene00001893	K06C4.11.1	his-19	protein_coding	protein_coding	WBGene00001893	0.526	384		GO:0003677; GO:0046982	GO:0000786	TRUE	2.50658	3.07227e-05	0.000100067	V	8895765	8896148	384	+	67.2918	86.673	71.8233	6.77974	20.9711	11.5975	9.57539	11.2452	11.1041	0.552137	1.69907	1.04583
WBGene00001895	K06C4.3.1	his-21	protein_coding	protein_coding	WBGene00001895	0.526	384		GO:0003677; GO:0046982	GO:0000786	TRUE	2.50658	3.07227e-05	0.000100067	V	8891883	8892266	384	-	67.2918	86.673	71.8233	6.77974	20.9711	11.5975	9.57539	11.2452	11.1041	0.552137	1.69907	1.04583
WBGene00001925	F07B7.10.1	his-51	protein_coding	protein_coding	WBGene00001925	0.526	384		GO:0003677; GO:0046982	GO:0000786	TRUE	2.50658	3.07227e-05	0.000100067	V	8849788	8850171	384	-	67.2918	86.673	71.8233	6.77974	20.9711	11.5975	9.57539	11.2452	11.1041	0.552137	1.69907	1.04583
WBGene00001927	F07B7.3.1	his-53	protein_coding	protein_coding	WBGene00001927	0.526	384		GO:0003677; GO:0046982	GO:0000786	TRUE	2.50658	3.07227e-05	0.000100067	V	8853670	8854053	384	+	67.2918	86.673	71.8233	6.77974	20.9711	11.5975	9.57539	11.2452	11.1041	0.552137	1.69907	1.04583
WBGene00004163	Y39A3CR.7.1	pqn-82	protein_coding	protein_coding	WBGene00004163	0.4696	1367				TRUE	2.50441	0.00104747	0.00252806	III	1849047	1852902	3856	+	48.4537	24.7546	45.0961	6.19205	10.5431	4.30475	1.9368	0.902196	1.95848	0.141655	0.23995	0.109045
WBGene00004340	F31E3.3.1	rfc-4	protein_coding	protein_coding	WBGene00004340	0.3907	1157	GO:0006260; GO:0006261; GO:0006281	GO:0000166; GO:0003689; GO:0005515; GO:0005524; GO:0016887	GO:0005634; GO:0005663	TRUE	2.50171	9.30388e-10	5.59479e-09	III	6972210	6973717	1508	+	767.001	733.517	442.288	157.897	75.1193	109.771	36.2233	31.5857	22.6945	4.26782	2.01995	3.28534
WBGene00044421	D1007.18.1	D1007.18	protein_coding	protein_coding	WBGene00044421	0.3545	426				FALSE	2.50143	0.445737		I	4578695	4579740	1046	-	2.20244	4.56006	0	0	0	1.07619	0.282501	0.533303	0	0	0	0.087479
WBGene00022696	ZK328.7a.1; ZK328.7b.1	ift-139	protein_coding	protein_coding	WBGene00022696	0.3978	3702	GO:0030030; GO:0035721; GO:0061512		GO:0005737; GO:0005856; GO:0005929; GO:0030425; GO:0030991; GO:0042995	TRUE	2.49861	0.0203734	0.0361886	III	6032696	6039475	6780	-	63.3202	48.8577	249.762	2.06402	51.3974	10.7619	0.934612	0.657522	4.00535	0.0174358	0.431944	0.100665
WBGene00005076	F23F12.10.1	srb-11	protein_coding	protein_coding	WBGene00005076	0.3151	1041	GO:0007606	GO:0004888	GO:0016020; GO:0016021	FALSE	2.49756	0.530121		III	6491368	6492907	1540	-	0.550611	1.30287	1.73446	0	0	0	0.0289014	0.0623541	0.0989154	0	0	0
WBGene00010938	M163.6.1	M163.6	protein_coding	protein_coding	WBGene00010938	0.4744	567				FALSE	2.49756	0.530121		X	14462857	14464400	1544	+	0.550611	1.30287	1.73446	0	0	0	0.0530624	0.114481	0.181607	0	0	0
WBGene00016421	C34G6.5.1	cdc-7	protein_coding	protein_coding	WBGene00016421	0.3683	1458	GO:0006468; GO:0007165; GO:0016310; GO:0018105	GO:0000166; GO:0004672; GO:0004674; GO:0005524; GO:0016301	GO:0005634; GO:0005737	TRUE	2.4975	2.07164e-05	6.95692e-05	I	5872174	5874343	2170	+	149.766	147.225	98.8644	20.6402	39.5364	10.7619	5.61283	5.03079	4.02561	0.442711	0.843652	0.255597
WBGene00016387	C34B2.2.1	kbp-5	protein_coding	protein_coding	WBGene00016387	0.4011	561		GO:0005515	GO:0000776	TRUE	2.49744	7.5539e-08	3.63685e-07	I	10687363	10688068	706	+	112.875	101.624	90.1921	21.6722	18.4503	13.9904	10.9941	9.025	9.54454	1.20811	1.02321	0.863563
WBGene00015328	C02B10.3.1	C02B10.3	protein_coding	protein_coding	WBGene00015328	0.38	1437			GO:0016020; GO:0016021	TRUE	2.4971	1.81793e-09	1.05956e-08	IV	5092823	5103279	10457	-	434.982	262.529	249.763	43.3444	52.7153	72.1045	16.5402	9.10194	10.3186	0.94328	1.14131	1.73753
WBGene00007548	C13C4.4.1	C13C4.4	protein_coding	protein_coding	WBGene00007548	0.3974	1019	GO:0016311	GO:0004427; GO:0016791	GO:0005829	TRUE	2.49249	8.38062e-07	3.51673e-06	V	12109168	12110978	1811	-	175.094	170.676	176.915	15.4801	28.9934	48.4284	9.38908	8.34474	10.3072	0.475079	0.885214	1.6457
WBGene00010678	K08F4.3.1	K08F4.3	protein_coding	protein_coding	WBGene00010678	0.4183	796			GO:0005783; GO:0005789; GO:0016020; GO:0016021	TRUE	2.49061	5.86071e-11	4.02774e-10	IV	10129257	10130244	988	+	762.045	947.189	511.667	156.865	147.603	91.4759	52.311	59.2839	38.1613	6.16281	5.76905	3.97941	1
WBGene00010976	R02D5.1.1	R02D5.1	protein_coding	protein_coding	WBGene00010976	0.4431	1133		GO:0005515		TRUE	2.49021	2.61565e-12	2.07252e-11	V	14508249	14509655	1407	+	910.71	646.876	690.317	143.449	86.9802	168.961	43.9214	28.4449	36.1716	3.95943	2.38844	5.16396	1
WBGene00195147	F14E5.8.1; F14E5.8.2	F14E5.8	protein_coding	protein_coding	WBGene00195147	0.4072	471				TRUE	2.48366	0.000842708	0.0020714	II	8420098	8422054	1957	+	571.534	616.259	426.678	16.5122	69.8477	202.323	66.2347	65.1171	53.7239	1.09519	4.60886	14.859
WBGene00008848	F15B9.4.1	inft-2	protein_coding	protein_coding	WBGene00008848	0.4544	3752	GO:0030041	GO:0003779; GO:0008017	GO:0005737; GO:0005884	TRUE	2.4836	1.98575e-06	7.82105e-06	V	13002317	13006987	4671	+	134.349	277.512	208.136	21.6722	55.351	34.438	1.95658	3.68496	3.29331	0.180636	0.458972	0.317834
WBGene00000520	R07E5.8a.1; R07E5.8a.2; R07E5.8b.1; R07E5.8b.2; R07E5.8c.1; R07E5.8c.2; R07E5.8c.3	cku-80	protein_coding	protein_coding	WBGene00000520	0.3845	1809	GO:0000723; GO:0006281; GO:0006302; GO:0006303; GO:0006310; GO:0006974; GO:0032508; GO:0071480; GO:0071481	GO:0000166; GO:0003677; GO:0003678; GO:0003684; GO:0003690; GO:0004386; GO:0005524; GO:0016787; GO:0016887; GO:0042162	GO:0005634; GO:0043564	TRUE	2.48311	2.69465e-12	2.13094e-11	III	4419848	4423368	3521	+	339.727	331.581	449.226	50.5685	63.2583	86.0949	10.2616	9.13197	14.7426	0.87419	1.08793	1.64803	1
WBGene00021887	Y54G2A.22.1	fbxc-45	protein_coding	protein_coding	WBGene00021887	0.4307	1082				TRUE	2.47608	0.130018	0.183194	IV	2919826	2922251	2426	-	19.2714	17.5888	15.6102	9.28808	0	0	0.97322	0.809883	0.856505	0.26845	0	0
WBGene00019512	K08A2.2.1	K08A2.2	protein_coding	protein_coding	WBGene00019512	0.4318	1093				TRUE	2.47485	0.0402616	0.0663078	II	2991613	2994313	2701	+	9.91099	22.8003	27.7514	4.12804	0	6.45712	0.495476	1.03928	1.50735	0.11811	0	0.204571
WBGene00003986	K05B2.5a.1; K05B2.5a.2; K05B2.5a.3; K05B2.5b.1; K05B2.5c.1	mct-4	protein_coding	protein_coding	WBGene00003986	0.4096	2801	GO:0015718; GO:0055085	GO:0008028; GO:0022857	GO:0016020; GO:0016021	TRUE	2.47158	7.32842e-21	1.09682e-19	X	4921252	4929757	8506	-	2327.43	2228.57	1854.14	467.5	311.02	376.665	45.4035	39.6393	39.2988	5.21955	3.4546	4.65659	1
WBGene00015806	C16A3.1a.1; C16A3.1b.1; C16A3.1c.1	smrc-1	protein_coding	protein_coding	WBGene00015806	0.418	2235	GO:0006281; GO:0006325; GO:0006357; GO:0031297; GO:0048478	GO:0000166; GO:0004386; GO:0005524; GO:0016787; GO:0036310	GO:0005634; GO:0043596	TRUE	2.47146	9.32694e-11	6.24699e-10	III	6390946	6393843	2898	+	1177.76	1654	1469.09	343.659	147.603	283.037	28.7941	36.8698	39.023	4.80856	2.05466	4.38522	1
WBGene00000519	Y47D3A.4.1	cku-70	protein_coding	protein_coding	WBGene00000519	0.428	2112	GO:0000723; GO:0006281; GO:0006303; GO:0006310; GO:0006974; GO:0032508; GO:0071480; GO:0071481	GO:0000166; GO:0003677; GO:0003678; GO:0003684; GO:0003690; GO:0004386; GO:0005524; GO:0016787; GO:0042162	GO:0005634; GO:0043564	TRUE	2.47113	1.56876e-26	3.41438e-25	III	11154827	11168820	13994	+	1576.4	1502.21	1670.29	252.842	266.212	336.847	40.7847	35.4365	46.9512	3.74387	3.92154	5.52286	1
WBGene00015037	B0212.3.1	B0212.3	protein_coding	protein_coding	WBGene00015037	0.3915	2143				TRUE	2.47036	3.27856e-05	0.000106263	IV	3540136	3543603	3468	+	197.037	157.888	221.205	15.381	64.1735	24.5045	5.02401	3.67063	6.12804	0.224453	0.931658	0.395957
WBGene00021856	Y54F10BM.1.1	ppm-1.D	protein_coding	protein_coding	WBGene00021856	0.4252	2488	GO:0006470; GO:0016311	GO:0004721; GO:0016787; GO:0016791; GO:0046872; GO:0051019	GO:0005634; GO:0005829	TRUE	2.46568	1.34535e-06	5.46389e-06	III	2331572	2342184	10613	+	95.2557	127.03	117.944	15.4801	31.6292	15.0666	2.09202	2.54372	2.81432	0.194576	0.395513	0.209696
WBGene00018010	F33E11.2a.1; F33E11.2b.1	F33E11.2	protein_coding	protein_coding	WBGene00018010	0.4843	1018				FALSE	2.46385	0.114348		V	297949	300005	2057	+	5.50611	6.51436	12.1412	3.09603	0	1.07619	0.295544	0.318814	0.708051	0.095109	0	0.0366071
WBGene00016461	C35E7.9.1	C35E7.9	protein_coding	protein_coding	WBGene00016461	0.4068	1062			GO:0005856	FALSE	2.46372	0.127827		I	10806922	10808238	1317	+	3.85428	13.6802	6.93786	3.09603	1.31788	0	0.19831	0.641771	0.387838	0.0911686	0.0386078	0
WBGene00001330	Y57G11C.24a.1; Y57G11C.24a.2; Y57G11C.24a.3; Y57G11C.24d.1; Y57G11C.24d.2; Y57G11C.24d.3; Y57G11C.24d.4; Y57G11C.24d.5; Y57G11C.24d.6; Y57G11C.24d.7; Y57G11C.24d.8; Y57G11C.24d.9; Y57G11C.24e.1; Y57G11C.24g.1; Y57G11C.24h.1; Y57G11C.24i.1; Y57G11C.24j.1; Y57G11C.24j.2; Y57G11C.24j.3; Y57G11C.24k.1; Y57G11C.24k.2; Y57G11C.24k.3; Y57G11C.24k.4; Y57G11C.24k.5; Y57G11C.24k.6; Y57G11C.24k.7; Y57G11C.2…	eps-8	protein_coding	protein_coding	WBGene00001330	0.4706	2879	GO:0002119; GO:0007266; GO:0035023; GO:0045109; GO:0045185; GO:0048546; GO:0048598; GO:0048730; GO:0051016; GO:0051017	GO:0003779; GO:0005515; GO:0008092; GO:0051015	GO:0005737; GO:0005886; GO:0005903; GO:0030056; GO:0045177; GO:0110165	TRUE	2.46148	1.67497e-12	1.34585e-11	IV	14879490	14900652	21163	+	1018.63	894.425	992.113	173.378	112.02	241.066	19.333	15.478	20.4583	1.88329	1.21053	2.89948	1
WBGene00011754	T13F3.7.1	T13F3.7	protein_coding	protein_coding	WBGene00011754	0.4397	1053			GO:0016020; GO:0016021	FALSE	2.45898	0.209911		V	16272686	16275410	2725	-	4.9555	1.95431	5.20339	1.03201	0	1.07619	0.257149	0.0924652	0.293364	0.0306493	0	0.0353904
WBGene00000418	C35D10.9a.1; C35D10.9a.2; C35D10.9b.1; C35D10.9b.2	ced-4	protein_coding	protein_coding	WBGene00000418	0.3934	1909	GO:0006915; GO:0006919; GO:0008361; GO:0009792; GO:0010954; GO:0030042; GO:0030155; GO:0031647; GO:0040034; GO:0042981; GO:0043065; GO:0043066; GO:0043281; GO:0046716; GO:0048598; GO:0050829; GO:0097202; GO:1902742; GO:1904747; GO:1905808; GO:2001056	GO:0000166; GO:0000287; GO:0005515; GO:0005524; GO:0008656; GO:0016505; GO:0042802; GO:0043531; GO:0046872; GO:0051432; GO:0051434; GO:0061133; GO:0089720	GO:0005634; GO:0005737; GO:0005739; GO:0005829; GO:0008303; GO:0016020; GO:0032991; GO:0048471	TRUE	2.45866	1.4917e-14	1.45956e-13	III	4852313	4855177	2865	+	1263.1	1269	1462.15	331.275	176.596	217.389	36.1541	33.1184	45.4711	5.42685	2.87805	3.94329	1
WBGene00015622	C09B8.3.1	C09B8.3	protein_coding	protein_coding	WBGene00015622	0.3818	1425			GO:0005892; GO:0016020; GO:0016021	FALSE	2.45767	0.267738		X	6006969	6010633	3665	-	0	18.2402	5.20339	2.06402	0	2.15237	0	0.637718	0.216781	0.0452964	0	0.0523032
WBGene00018838	F54G2.2.1	F54G2.2	protein_coding	protein_coding	WBGene00018838	0.3988	3072				FALSE	2.45745	0.468099		X	2634664	2637800	3137	-	3.30366	0	3.46893	0	0	1.07619	0.0587625	0	0.0670383	0	0	0.0121309
WBGene00018114	F36H9.6.1	srt-41	protein_coding	protein_coding	WBGene00018114	0.4507	1034			GO:0016020; GO:0016021	FALSE	2.45624	0.537156		V	1799726	1803143	3418	-	1.10122	0.651436	1.73446	0	0	0	0.0581942	0.0313881	0.099585	0	0	0
WBGene00016488	C36C9.5.1	C36C9.5	protein_coding	protein_coding	WBGene00016488	0.4399	1455				TRUE	2.45617	0.0593108	0.0930174	X	1699788	1703938	4151	-	11.0122	8.46867	22.548	4.12804	0	3.22856	0.413559	0.289979	0.920015	0.0887249	0	0.0768372
WBGene00013857	ZC168.3a.1; ZC168.3b.1	orc-5	protein_coding	protein_coding	WBGene00013857	0.3916	834	GO:0006260; GO:0006270	GO:0003688	GO:0000808; GO:0005634; GO:0005664	TRUE	2.45482	5.02627e-10	3.12479e-09	IV	10732832	10734632	1801	-	267.597	246.243	274.046	67.0806	31.6292	44.1237	17.5324	14.71	19.5077	2.51533	1.1799	1.83202	1
WBGene00017028	D1044.2a.1; D1044.2b.1; D1044.2c.1	dex-1	protein_coding	protein_coding	WBGene00017028	0.4424	3424	GO:0003391; GO:0007160; GO:0007399	GO:0003674; GO:0005509	GO:0005576; GO:0016020; GO:0016021; GO:0030425; GO:0032590; GO:0042995	TRUE	2.45131	4.15568e-11	2.90036e-10	III	5526071	5535481	9411	+	981.19	769.998	1502.05	158.93	183.186	251.828	15.6583	11.2039	26.0435	1.45156	1.66449	2.5468	1
WBGene00018578	F47G3.3.1	F47G3.3	protein_coding	protein_coding	WBGene00018578	0.4042	1848				TRUE	2.45074	2.05123e-07	9.33798e-07	X	2375997	2379060	3064	+	371.662	267.089	256.701	82.5607	28.9934	51.657	10.9894	7.20058	8.24659	1.39713	0.488113	0.967949
WBGene00000492	F59C6.7a.1; F59C6.7b.1	che-13	protein_coding	protein_coding	WBGene00000492	0.3803	1202	GO:0007635; GO:0008104; GO:0035720; GO:0035721; GO:0042073; GO:0060271; GO:1905515	GO:0003674	GO:0005737; GO:0005794; GO:0005813; GO:0005856; GO:0005929; GO:0005930; GO:0030992; GO:0035869; GO:0036064; GO:0042995	TRUE	2.45026	0.00429138	0.00901948	I	10507000	10515506	8507	-	68.2757	76.8695	362.503	20.6402	59.3047	12.9142	3.10375	3.18613	17.9043	0.536999	1.535	0.37204
WBGene00002095	C17C3.19.1	ins-12	protein_coding	protein_coding	WBGene00002095	0.3626	273				FALSE	2.44677	0.538773		II	5554617	5555306	690	+	3.30366	0	0	0	0	0	0.66124	0	0	0	0	0
WBGene00005304	F09G2.7.1	srh-83	protein_coding	protein_coding	WBGene00005304	0.3503	1059			GO:0016020; GO:0016021	FALSE	2.44677	0.538773		V	7164510	7165895	1386	+	3.30366	0	0	0	0	0	0.170461	0	0	0	0	0
WBGene00007290	C04B4.2.1	C04B4.2	protein_coding	protein_coding	WBGene00007290	0.425	1814	GO:0010629		GO:0005737	FALSE	2.44677	0.538773		X	12283285	12285307	2023	+	3.30366	0	0	0	0	0	0.099514	0	0	0	0	0
WBGene00011710	T11F9.7.1	T11F9.7	protein_coding	protein_coding	WBGene00011710	0.4211	767				FALSE	2.44677	0.538773		V	11475938	11476906	969	+	3.30366	0	0	0	0	0	0.235356	0	0	0	0	0
WBGene00013528	Y73F8A.23.1	Y73F8A.23	protein_coding	protein_coding	WBGene00013528	0.3945	801				FALSE	2.44677	0.538773		IV	15442960	15444581	1622	-	3.30366	0	0	0	0	0	0.225366	0	0	0	0	0
WBGene00017112	E03H12.5.1	E03H12.5	protein_coding	protein_coding	WBGene00017112	0.4366	797				FALSE	2.44677	0.538773		IV	4977201	4978084	884	+	3.30366	0	0	0	0	0	0.226497	0	0	0	0	0
WBGene00020473	T13B5.6.1	lips-12	protein_coding	protein_coding	WBGene00020473	0.4183	875	GO:0016042	GO:0016298; GO:0016787		FALSE	2.44677	0.538773		II	1112189	1114226	2038	-	3.30366	0	0	0	0	0	0.206307	0	0	0	0	0
WBGene00021257	Y22D7AR.3.1	Y22D7AR.3	protein_coding	protein_coding	WBGene00021257	0.4293	198				FALSE	2.44677	0.538773		III	1665493	1665793	301	-	3.30366	0	0	0	0	0	0.911709	0	0	0	0	0
WBGene00043054	T21B4.15.1	T21B4.15	protein_coding	protein_coding	WBGene00043054	0.4494	850				FALSE	2.44677	0.538773		II	12490214	12491815	1602	+	3.30366	0	0	0	0	0	0.212375	0	0	0	0	0
WBGene00271774	R02F2.10.1	R02F2.10	protein_coding	protein_coding	WBGene00271774	0.5	402				FALSE	2.44677	0.538773		III	5478319	5479052	734	+	3.30366	0	0	0	0	0	0.449051	0	0	0	0	0
WBGene00001877	T10C6.12.1	his-3	protein_coding	protein_coding	WBGene00001877	0.4807	518	GO:0006281; GO:0006355	GO:0003677; GO:0046982	GO:0000786; GO:0005634; GO:0005694	TRUE	2.4403	2.49553e-08	1.27329e-07	V	16040771	16041288	518	+	334.329	515.011	272.58	43.2957	79.4832	85.5561	35.2671	49.5336	31.2401	2.61384	4.77385	5.71935
WBGene00012716	Y39E4B.5.1	Y39E4B.5	protein_coding	protein_coding	WBGene00012716	0.4461	1699	GO:0015749; GO:0055085	GO:0015149; GO:0022857	GO:0016020; GO:0016021	TRUE	2.43667	1.33383e-11	9.81786e-11	III	13169916	13173106	3191	+	214.738	188.917	202.932	29.9283	46.1259	36.5904	6.90624	5.53975	7.09099	0.550875	0.844645	0.74576	1
WBGene00001881	F45F2.4.1	his-7	protein_coding	protein_coding	WBGene00001881	0.4807	491		GO:0003677; GO:0046982	GO:0000786	TRUE	2.43651	1.18233e-05	4.11525e-05	V	8533379	8533869	491	+	134.651	157.377	138.821	10.089	34.0957	35.5442	14.9849	15.9689	16.785	0.642583	2.16044	2.50676
WBGene00009232	F28H6.3.1	nkat-1	protein_coding	protein_coding	WBGene00009232	0.4135	1417	GO:0009058; GO:0097052	GO:0003824; GO:0016212; GO:0030170	GO:0005737; GO:0005739	FALSE	2.43623	0.53693		X	14137997	14140070	2074	-	0	6.51436	0	0	1.31788	0	0	0.229042	0	0	0.0289354	0
WBGene00022544	ZC190.10a.1; ZC190.10b.1; ZC190.10c	ZC190.10	protein_coding	protein_coding	WBGene00022544	0.4553	262				FALSE	2.43335	0.359732		V	8692198	8696312	4115	-	2.20244	2.60575	1.73446	1.03201	0	0	0.458809	0.494934	0.392569	0.123041	0	0
WBGene00001193	C23H3.1a.1; C23H3.1b.1	egl-26	protein_coding	protein_coding	WBGene00001193	0.4134	1302	GO:0000902; GO:0002119; GO:0009792; GO:0018991; GO:0040025; GO:0040026	GO:0016740; GO:0016746	GO:0005886; GO:0016020; GO:0016324; GO:0098592	TRUE	2.43242	2.9161e-19	3.97212e-18	II	69654	71279	1626	+	369.46	377.833	362.503	62.9525	68.5298	74.2569	15.5054	14.4578	16.5291	1.51205	1.63754	1.97493	1
WBGene00011328	T01D3.3a.1; T01D3.3b.1; T01D3.3b.2	T01D3.3	protein_coding	protein_coding	WBGene00011328	0.4293	3091	GO:0006801; GO:0010466; GO:0010951	GO:0004867; GO:0030414; GO:0046872	GO:0005576	TRUE	2.43116	7.71712e-05	0.000232549	V	13704929	13711085	6157	+	1494.36	1440.32	6545.86	414.867	635.219	707.055	26.4169	23.2153	125.724	4.19735	6.39363	7.92099
WBGene00019115	F59E11.10a.1; F59E11.10b.1	nhr-195	protein_coding	protein_coding	WBGene00019115	0.3375	1064	GO:0006355	GO:0003677; GO:0003700; GO:0008270; GO:0043565; GO:0046872	GO:0005634	TRUE	2.42518	2.08587e-06	8.18349e-06	V	8970744	8972364	1621	-	179.499	146.573	261.903	18.5762	43.4901	47.3523	9.2182	6.8632	14.6133	0.545984	1.27166	1.54108
WBGene00020492	T13G4.5.1	T13G4.5	protein_coding	protein_coding	WBGene00020492	0.4466	768				FALSE	2.42069	0.486797		X	1195108	1198481	3374	-	0.550611	5.86293	0	1.03201	0	0	0.039175	0.380336	0	0.042023	0	0
WBGene00010031	F54B11.8.1	F54B11.8	protein_coding	protein_coding	WBGene00010031	0.3824	591				TRUE	2.41835	5.19893e-09	2.88584e-08	X	13602200	13603918	1719	-	440.489	242.986	454.43	80.4967	81.7087	50.5808	40.7261	20.4836	45.6487	4.25947	4.30134	2.96363
WBGene00008010	C38D9.2.1; C38D9.2.2	C38D9.2	protein_coding	protein_coding	WBGene00008010	0.4618	1604				TRUE	2.41652	0.0191625	0.0343142	V	17567513	17571603	4091	+	98.6023	115.984	57.4479	22.7042	0	28.0096	3.35899	3.60254	2.12627	0.442656	0	0.604683
WBGene00000082	C02B4.1.1	adt-1	protein_coding	protein_coding	WBGene00000082	0.4544	4802	GO:0006508; GO:0030198	GO:0004222; GO:0008233; GO:0008237; GO:0016787; GO:0046872	GO:0005576; GO:0031012	TRUE	2.41636	0.0216392	0.0382018	X	12678832	12689279	10448	+	109.572	196.082	90.1921	33.0243	0	40.8951	1.24681	2.03437	1.11505	0.215068	0	0.2949
WBGene00003562	F09G8.4.1	ncr-2	protein_coding	protein_coding	WBGene00003562	0.3995	3942	GO:0006869; GO:0030301; GO:0040024; GO:0040025; GO:0042632		GO:0016020; GO:0016021	TRUE	2.41581	0.00214408	0.00481613	III	8258345	8265805	7461	+	20.3726	44.9491	76.3164	9.28808	10.5431	6.45712	0.282394	0.568091	1.14935	0.0736842	0.0832095	0.0567215
WBGene00000708	M199.5a.1; M199.5b.1	col-135	protein_coding	protein_coding	WBGene00000708	0.502	1943	GO:0030198; GO:0048856	GO:0005201	GO:0005581; GO:0005615; GO:0031012	FALSE	2.41488	0.544239		IV	15129666	15131797	2132	-	0	3.25718	0	0	0	0	0	0.0835185	0	0	0	0
WBGene00002085	ZK75.2.1	ins-2	protein_coding	protein_coding	WBGene00002085	0.3413	545	GO:0007165; GO:1905910	GO:0005179	GO:0005576	FALSE	2.41488	0.544239		II	5988526	5989394	869	+	0	3.25718	0	0	0	0	0	0.297755	0	0	0	0
WBGene00005065	T21H8.4.1	sra-39	protein_coding	protein_coding	WBGene00005065	0.3901	1128	GO:0050907; GO:0050911	GO:0004984	GO:0016020; GO:0016021	FALSE	2.41488	0.544239		X	13901064	13903428	2365	-	0	3.25718	0	0	0	0	0	0.143862	0	0	0	0
WBGene00005931	T06E6.3.1	fbxa-199	protein_coding	protein_coding	WBGene00005931	0.3651	819			GO:0016020; GO:0016021	FALSE	2.41488	0.544239		V	15397385	15398828	1444	-	0	3.25718	0	0	0	0	0	0.19814	0	0	0	0
WBGene00006179	C09H5.9.1	str-130	protein_coding	protein_coding	WBGene00006179	0.3552	1067	GO:0007186; GO:0042048; GO:0050911	GO:0038022	GO:0005887; GO:0016020; GO:0016021	FALSE	2.41488	0.544239		V	8089319	8090695	1377	-	0	3.25718	0	0	0	0	0	0.152087	0	0	0	0
WBGene00008552	F07B10.6.1	srsx-31	protein_coding	protein_coding	WBGene00008552	0.3474	927	GO:0007186	GO:0004930	GO:0016020; GO:0016021	FALSE	2.41488	0.544239		V	11254013	11255080	1068	-	0	3.25718	0	0	0	0	0	0.175056	0	0	0	0
WBGene00009548	F38H4.4.1	F38H4.4	protein_coding	protein_coding	WBGene00009548	0.4094	1678	GO:0006470; GO:0035335	GO:0004725		FALSE	2.41488	0.544239		IV	11848232	11850309	2078	+	0	3.25718	0	0	0	0	0	0.0967083	0	0	0	0
WBGene00009861	F49B2.1.1	fbxb-8	protein_coding	protein_coding	WBGene00009861	0.4366	939				FALSE	2.41488	0.544239		I	14298755	14299763	1009	+	0	3.25718	0	0	0	0	0	0.172818	0	0	0	0
WBGene00013052	Y50E8A.9a.1; Y50E8A.9b.1; Y50E8A.9c.1	scrm-7	protein_coding	protein_coding	WBGene00013052	0.4339	655	GO:0017121	GO:0017128	GO:0005886	FALSE	2.41488	0.544239		V	14778336	14779714	1379	-	0	3.25718	0	0	0	0	0	0.247637	0	0	0	0
WBGene00018359	F42G8.8.1	F42G8.8	protein_coding	protein_coding	WBGene00018359	0.412	1221	GO:0006470	GO:0004722; GO:0016787	GO:0005634; GO:0005737	FALSE	2.41488	0.544239		IV	8119090	8121340	2251	+	0	3.25718	0	0	0	0	0	0.132905	0	0	0	0
WBGene00022312	Y77E11A.9.1	clec-171	protein_coding	protein_coding	WBGene00022312	0.4478	891				FALSE	2.41488	0.544239		IV	1425482	1426887	1406	-	0	3.2896	0	0	0	0	0	0.183941	0	0	0	0
WBGene00045475	T07A5.7.1	T07A5.7	protein_coding	protein_coding	WBGene00045475	0.4418	1263	GO:0006486			FALSE	2.41488	0.544239		III	10306756	10311100	4345	-	0	3.25718	0	0	0	0	0	0.128485	0	0	0	0
WBGene00194654	M05B5.7.1	M05B5.7	protein_coding	protein_coding	WBGene00194654	0.3827	243			GO:0016020; GO:0016021	FALSE	2.41488	0.544239		I	7175539	7176434	896	-	0	3.25718	0	0	0	0	0	0.667804	0	0	0	0
WBGene00194783	K03B8.14.1	K03B8.14	protein_coding	protein_coding	WBGene00194783	0.3839	336				FALSE	2.41488	0.544239		V	11390516	11390925	410	+	0	3.25718	0	0	0	0	0	0.482966	0	0	0	0
WBGene00195048	K08D10.13.1	K08D10.13	protein_coding	protein_coding	WBGene00195048	0.4342	228				FALSE	2.41488	0.544239		IV	4170776	4171569	794	-	0	3.25718	0	0	0	0	0	0.711739	0	0	0	0
WBGene00018544	F47C10.7a.1; F47C10.7b.1	nhr-188	protein_coding	protein_coding	WBGene00018544	0.39	1000	GO:0006355	GO:0003677; GO:0003700; GO:0008270; GO:0043565; GO:0046872	GO:0005634	FALSE	2.41372	0.544439		V	3856329	3857861	1533	-	1.65183	0	1.73446	0	0	0	0.0902592	0	0.102971	0	0	0
WBGene00020494	T13G4.7.1	T13G4.7	protein_coding	protein_coding	WBGene00020494	0.5405	666				FALSE	2.41372	0.544439		X	1202606	1203763	1158	-	1.65183	0	1.73446	0	0	0	0.135524	0	0.154611	0	0	0
WBGene00021245	Y22D7AL.6a.1; Y22D7AL.6b.1	Y22D7AL.6	protein_coding	protein_coding	WBGene00021245	0.4274	551				TRUE	2.41325	6.33647e-15	6.3276e-14	III	1604955	1606850	1896	+	1369.37	1026.01	1033.74	159.961	217.45	266.894	135.798	92.7713	111.38	9.07879	12.2781	16.7731	1
WBGene00001879	F45F2.3.1	his-5	protein_coding	protein_coding	WBGene00001879	0.4671	486		GO:0003677; GO:0046982		TRUE	2.4094	8.45382e-05	0.000253301	V	8535177	8535662	486	+	623.996	1033.18	242.429	67.6255	193.964	97.0529	70.157	105.914	29.6141	4.3515	12.4168	6.91509
WBGene00021406	Y38C1AB.4.1	frm-5.2	protein_coding	protein_coding	WBGene00021406	0.5112	4059				TRUE	2.40754	0.0300758	0.0512379	IV	695	14926	14232	+	162.53	251.034	278.728	0	79.3091	51.8897	2.18797	3.08125	4.07672	0	0.607893	0.442677
WBGene00010362	H04D03.1.1	enu-3.1	protein_coding	protein_coding	WBGene00010362	0.4362	1309	GO:0048675; GO:0048846		GO:0016020; GO:0016021; GO:0043025	TRUE	2.40456	2.61104e-09	1.49663e-08	III	10436609	10438089	1481	+	2102.89	1766.31	1148.58	463.57	221.43	262.598	87.7815	67.2266	52.092	11.0749	5.26285	6.94669
WBGene00002694	C10H11.9.1	let-502	protein_coding	protein_coding	WBGene00002694	0.4242	4366	GO:0000281; GO:0002119; GO:0006468; GO:0007266; GO:0008360; GO:0009792; GO:0010172; GO:0016310; GO:0018107; GO:0030154; GO:0030866; GO:0031032; GO:0035556; GO:0048477; GO:0048598; GO:0060465; GO:1901888; GO:1905905	GO:0000166; GO:0004672; GO:0004674; GO:0004712; GO:0005524; GO:0016301; GO:0016740; GO:0046872; GO:0072518; GO:0106310	GO:0005634; GO:0005737; GO:0005856; GO:0005912; GO:0032154; GO:0043292	TRUE	2.40149	1.70377e-11	1.23724e-10	I	4738171	4744321	6151	-	2291.64	1965.38	1932.19	418.996	230.629	520.875	28.6806	22.4273	26.2734	3.00117	1.64344	4.13119	1
WBGene00021285	Y24D9A.7.1	Y24D9A.7	protein_coding	protein_coding	WBGene00021285	0.5085	234			GO:0016020; GO:0016021	FALSE	2.40106	0.475435		IV	4404938	4405171	234	-	1.10122	5.21149	0	0	1.31788	0	0.257149	1.10958	0	0	0.17522	0
WBGene00016163	C27D9.1.1	C27D9.1	protein_coding	protein_coding	WBGene00016163	0.4323	1899	GO:0006486; GO:0036065	GO:0008417; GO:0046920	GO:0016020	FALSE	2.40049	0.479603		II	4753413	4755595	2183	+	1.10122	5.21149	0	0	0	1.07619	0.0316866	0.136726	0	0	0	0.019624
WBGene00016933	C54G7.1.1	C54G7.1	protein_coding	protein_coding	WBGene00016933	0.4036	783				FALSE	2.40038	0.480379		X	5543951	5545529	1579	+	1.10122	5.21149	0	1.03201	0	0	0.076849	0.331599	0	0.041218	0	0
WBGene00219372	F01E11.17.1	F01E11.17	protein_coding	protein_coding	WBGene00219372	0.3925	930				TRUE	2.39792	0.0122545	0.0230506	X	6980784	6983132	2349	+	12.1134	19.5431	46.8305	4.12804	3.95364	6.45712	0.711721	1.04695	2.98948	0.138811	0.132263	0.240426
WBGene00017737	F23C8.8.1	F23C8.8	protein_coding	protein_coding	WBGene00017737	0.4487	1023	GO:0006468; GO:0016310; GO:0035556	GO:0004672; GO:0004674; GO:0005524; GO:0016301	GO:0005634	TRUE	2.39678	0.0245819	0.0427495	I	2429675	2432601	2927	-	10.4616	26.7089	32.9548	3.09603	1.31788	8.6095	0.558789	1.30075	1.91246	0.0946442	0.0400796	0.291426
WBGene00001912	K03A1.6.1	his-38	protein_coding	protein_coding	WBGene00001912	0.4516	496	GO:0045944	GO:0003677; GO:0046982		TRUE	2.39608	0.000472485	0.0012247	X	7309413	7309908	496	-	110.018	217.871	50.5584	16.5121	35.8078	20.4476	12.1201	21.8842	6.05147	1.04109	2.24605	1.42753
WBGene00008972	F20C5.7.1	F20C5.7	protein_coding	protein_coding	WBGene00008972	0.338	991	GO:0030206; GO:1902884	GO:0047756	GO:0016020; GO:0016021	FALSE	2.391	0.128677		IV	8744411	8745691	1281	-	18.7208	3.90862	5.20339	3.09603	0	2.15237	1.03223	0.1965	0.311718	0.0977003	0	0.075209
WBGene00015748	C14A11.2.1	C14A11.2	protein_coding	protein_coding	WBGene00015748	0.3994	939				TRUE	2.39085	0.0295901	0.0504815	X	2803112	2804830	1719	+	25.8787	35.1776	22.548	10.3201	0	5.38094	1.50592	1.86644	1.42558	0.343703	0	0.198435
WBGene00000496	T25G3.2.1; T25G3.2.2	chs-1	protein_coding	protein_coding	WBGene00000496	0.417	4214	GO:0006031; GO:0006038; GO:0030703; GO:1904778	GO:0004100; GO:0016740; GO:0016757; GO:0016758	GO:0005886; GO:0005938; GO:0016020; GO:0016021; GO:0030428; GO:0071944	TRUE	2.39024	0.0222611	0.039185	I	7554855	7559916	5062	+	105.717	57.9778	126.616	22.7042	0	32.2856	1.37081	0.685458	1.78379	0.168491	0	0.265302
WBGene00009231	F28H6.2a.1; F28H6.2b	ceh-89	protein_coding	protein_coding	WBGene00009231	0.3486	1331	GO:0006357; GO:0030154	GO:0003677	GO:0005634	TRUE	2.38881	4.17195e-11	2.91004e-10	X	14141946	14144889	2944	+	171.24	180.448	163.04	27.8642	32.947	37.6665	7.02996	6.7544	7.27217	0.654687	0.770125	0.979948	1
WBGene00012297	W06D4.3.1	W06D4.3	protein_coding	protein_coding	WBGene00012297	0.3737	875			GO:0005737	TRUE	2.38754	0.0581346	0.0914212	I	9058852	9060473	1622	+	30.2836	41.6919	12.1412	3.09603	0	12.9142	1.89115	2.37387	0.823767	0.110653	0	0.511077
WBGene00194734	T04A6.4.1	T04A6.4	protein_coding	protein_coding	WBGene00194734	0.4858	564				FALSE	2.38691	0.43307		III	7608570	7609268	699	-	0	2.60575	8.67232	2.06402	0	0	0	0.230179	0.912863	0.114446	0	0
WBGene00009886	F49E2.2a.1; F49E2.2b.1; F49E2.2c.1	F49E2.2	protein_coding	protein_coding	WBGene00009886	0.42	1915				TRUE	2.38384	6.77053e-09	3.69893e-08	X	9567296	9573723	6428	+	2026.25	1733.47	2008.51	184.729	523.199	398.189	57.8162	45.0985	62.2665	3.0167	8.50005	7.20023
WBGene00015320	C02B8.1.1; C02B8.1.2	C02B8.1	protein_coding	protein_coding	WBGene00015320	0.4324	651				FALSE	2.3824	0.310705		X	8147710	8148588	879	+	6.60733	1.30287	3.46893	0	0	2.15238	0.554588	0.099709	0.316347	0	0	0.114489
WBGene00008561	F07H5.10.1	F07H5.10	protein_coding	protein_coding	WBGene00008561	0.404	1198	GO:0000956; GO:0016070; GO:0090305; GO:0110155	GO:0000166; GO:0003723; GO:0004518; GO:0016787; GO:0034353; GO:0046872	GO:0005634; GO:0005829	TRUE	2.3802	1.16508e-07	5.49584e-07	II	8807133	8808582	1450	-	105.717	88.5954	102.333	16.5121	22.404	18.2952	4.82186	3.68441	5.07119	0.431034	0.581824	0.528817
WBGene00001976	T05A7.4.1; T05A7.4.2	hmg-11	protein_coding	protein_coding	WBGene00001976	0.4823	568		GO:0003677		TRUE	2.37694	1.48004e-25	3.03082e-24	II	4672798	4673746	949	+	885.933	1087.9	934.876	187.825	180.55	191.561	85.2271	95.4231	97.7136	10.3412	9.88946	11.6784	1
WBGene00001967	F31A3.2.1	hlh-28	protein_coding	protein_coding	WBGene00001967	0.3944	720	GO:0006357; GO:0009952; GO:0050767	GO:0000978; GO:0000981; GO:0046983	GO:0005634	FALSE	2.37676	0.550809		X	17551057	17551877	821	+	0	0	2.79854	0	0	0	0	0	0.230753	0	0	0
WBGene00003424	F26G1.7.1	msp-3	protein_coding	protein_coding	WBGene00003424	0.5044	456			GO:0005737; GO:0005856; GO:0031143; GO:0042995	FALSE	2.37676	0.550809		II	4785861	4786316	456	-	0	0	2.61337	0	0	0	0	0	0.34024	0	0	0
WBGene00003667	T15D6.6.1	nhr-77	protein_coding	protein_coding	WBGene00003667	0.3479	1141	GO:0006355	GO:0003677; GO:0003700; GO:0008270; GO:0043565; GO:0046872	GO:0005634	FALSE	2.37676	0.550809		I	12384277	12385731	1455	-	0	0	3.46893	0	0	0	0	0	0.180492	0	0	0
WBGene00005188	T07H8.5.1	srg-31	protein_coding	protein_coding	WBGene00005188	0.3376	939	GO:0007606	GO:0004888	GO:0016020; GO:0016021	FALSE	2.37676	0.550809		V	6951550	6953897	2348	-	0	0	3.46893	0	0	0	0	0	0.21932	0	0	0
WBGene00005290	T21B4.7.1	srh-69	protein_coding	protein_coding	WBGene00005290	0.3586	1001			GO:0016020; GO:0016021	FALSE	2.37676	0.550809		II	12513618	12514715	1098	-	0	0	3.46893	0	0	0	0	0	0.205736	0	0	0
WBGene00005344	F37B4.1.1	srh-127	protein_coding	protein_coding	WBGene00005344	0.3976	996			GO:0016020; GO:0016021	FALSE	2.37676	0.550809		V	2893276	2895584	2309	+	0	0	3.46893	0	0	0	0	0	0.206769	0	0	0
WBGene00005441	F07C4.14.1	srh-234	protein_coding	protein_coding	WBGene00005441	0.391	1005	GO:0007186	GO:0004930	GO:0005887; GO:0005929; GO:0016020; GO:0016021	FALSE	2.37676	0.550809		V	7650242	7651857	1616	-	0	0	3.46893	0	0	0	0	0	0.204917	0	0	0
WBGene00006153	T10H4.2.1	str-96	protein_coding	protein_coding	WBGene00006153	0.4176	1092	GO:0007186; GO:0042048; GO:0050911	GO:0038022	GO:0005887; GO:0016020; GO:0016021	FALSE	2.37676	0.550809		V	15292490	15293965	1476	-	0	0	3.46893	0	0	0	0	0	0.188591	0	0	0
WBGene00006435	F25G6.5a.1; F25G6.5b.1	stdh-4	protein_coding	protein_coding	WBGene00006435	0.3444	906	GO:0006629; GO:0006694; GO:0030497	GO:0016491	GO:0005783; GO:0016020; GO:0016021	FALSE	2.37676	0.550809		V	8549289	8551165	1877	+	0	0	3.46893	0	0	0	0	0	0.227309	0	0	0
WBGene00007326	C05C9.2.1	C05C9.2	protein_coding	protein_coding	WBGene00007326	0.4034	776				FALSE	2.37676	0.550809		X	11153065	11157643	4579	+	0	0	3.46893	0	0	0	0	0	0.265389	0	0	0
WBGene00008158	C47F8.2.1	nhr-165	protein_coding	protein_coding	WBGene00008158	0.4206	1089	GO:0006355	GO:0003677; GO:0003700; GO:0008270; GO:0043565; GO:0046872	GO:0005634	FALSE	2.37676	0.550809		I	12331085	12333413	2329	+	0	0	3.46893	0	0	0	0	0	0.189111	0	0	0
WBGene00008293	C54C8.5.1	glct-5	protein_coding	protein_coding	WBGene00008293	0.4536	915	GO:0005975; GO:0006486; GO:0050650	GO:0015018; GO:0016740; GO:0046872	GO:0000139; GO:0005794; GO:0016020; GO:0016021	FALSE	2.37676	0.550809		I	12453389	12454764	1376	+	0	0	3.46893	0	0	0	0	0	0.225073	0	0	0
WBGene00008381	D1081.3.1	D1081.3	protein_coding	protein_coding	WBGene00008381	0.3572	2259				FALSE	2.37676	0.550809		I	8463356	8469309	5954	-	0	0	3.46893	0	0	0	0	0	0.091165	0	0	0
WBGene00008786	F14B6.5.1	oac-16	protein_coding	protein_coding	WBGene00008786	0.4047	2019	GO:0009103; GO:0033692	GO:0016747	GO:0016020; GO:0016021	FALSE	2.37676	0.550809		I	12239160	12241808	2649	+	0	0	3.46893	0	0	0	0	0	0.102002	0	0	0
WBGene00010119	F55G7.1.1	F55G7.1	protein_coding	protein_coding	WBGene00010119	0.4339	1240				FALSE	2.37676	0.550809		X	11924461	11927032	2572	+	0	0	3.46893	0	0	0	0	0	0.166082	0	0	0
WBGene00010298	F59A1.12.1	F59A1.12	protein_coding	protein_coding	WBGene00010298	0.3889	972			GO:0016020; GO:0016021	FALSE	2.37676	0.550809		V	17666075	17667776	1702	-	0	0	3.46893	0	0	0	0	0	0.211874	0	0	0
WBGene00011403	T03F7.6.1	T03F7.6	protein_coding	protein_coding	WBGene00011403	0.3344	951			GO:0016020; GO:0016021	FALSE	2.37676	0.550809		V	11294693	11296562	1870	+	0	0	3.46893	0	0	0	0	0	0.216553	0	0	0
WBGene00012681	Y39B6A.22.1	asp-15	protein_coding	protein_coding	WBGene00012681	0.4885	1173	GO:0006508; GO:0008219	GO:0004190	GO:0005764	FALSE	2.37676	0.550809		V	19043215	19044853	1639	-	0	0	3.46893	0	0	0	0	0	0.175568	0	0	0
WBGene00012837	Y43F8C.16.1	Y43F8C.16	protein_coding	protein_coding	WBGene00012837	0.4608	1122				FALSE	2.37676	0.550809		V	19714213	19715519	1307	-	0	0	3.46893	0	0	0	0	0	0.183549	0	0	0
WBGene00013298	Y57G11B.6.1	Y57G11B.6	protein_coding	protein_coding	WBGene00013298	0.4388	417				FALSE	2.37676	0.550809		IV	14553598	14554883	1286	-	0	0	3.46893	0	0	0	0	0	0.493865	0	0	0
WBGene00013974	ZK455.3.1	npr-9	protein_coding	protein_coding	WBGene00013974	0.4247	1335	GO:0007165; GO:0007186; GO:0060756	GO:0004930	GO:0005886; GO:0005887; GO:0016020; GO:0016021	FALSE	2.37676	0.550809		X	11328591	11332072	3482	+	0	0	3.46893	0	0	0	0	0	0.154264	0	0	0
WBGene00014700	C37A5.6.1	C37A5.6	protein_coding	protein_coding	WBGene00014700	0.4962	264	GO:0045087			FALSE	2.37676	0.550809		I	14150731	14151041	311	-	0	0	2.94089	0	0	0	0	0	0.661338	0	0	0
WBGene00015244	B0524.5.1	B0524.5	protein_coding	protein_coding	WBGene00015244	0.4446	569				FALSE	2.37676	0.550809		III	1891383	1893842	2460	-	0	0	3.46893	0	0	0	0	0	0.361936	0	0	0
WBGene00015381	C03B1.13.1	C03B1.13	protein_coding	protein_coding	WBGene00015381	0.3876	1584	GO:0015749; GO:0055085	GO:0015149; GO:0022857	GO:0016020; GO:0016021	FALSE	2.37676	0.550809		X	6335279	6338035	2757	-	0	0	3.46893	0	0	0	0	0	0.130014	0	0	0
WBGene00015394	C03G6.6.1	C03G6.6	protein_coding	protein_coding	WBGene00015394	0.3474	924			GO:0016020; GO:0016021	FALSE	2.37676	0.550809		V	7357451	7358882	1432	+	0	0	3.46893	0	0	0	0	0	0.222881	0	0	0
WBGene00016776	C49D10.8.1	oac-11	protein_coding	protein_coding	WBGene00016776	0.4002	1989	GO:0009103; GO:0033692	GO:0016747	GO:0016020; GO:0016021	FALSE	2.37676	0.550809		II	3858142	3860926	2785	-	0	0	3.46893	0	0	0	0	0	0.10354	0	0	0
WBGene00016980	C56G2.5.1	C56G2.5	protein_coding	protein_coding	WBGene00016980	0.4119	2236	GO:0006468; GO:0016310; GO:0018105; GO:0035556	GO:0000166; GO:0004672; GO:0004674; GO:0005524; GO:0016301; GO:0016740		FALSE	2.37676	0.550809		III	6321176	6324239	3064	-	0	0	3.46893	0	0	0	0	0	0.0921028	0	0	0
WBGene00017413	F13A2.4.1	F13A2.4	protein_coding	protein_coding	WBGene00017413	0.4755	551		GO:0005515		FALSE	2.37676	0.550809		V	4398635	4400218	1584	-	0	0	3.46893	0	0	0	0	0	0.37376	0	0	0
WBGene00017590	F19B10.11.1	F19B10.11	protein_coding	protein_coding	WBGene00017590	0.4954	1518				FALSE	2.37676	0.550809		II	3651256	3654276	3021	+	0	0	3.46893	0	0	0	0	0	0.135667	0	0	0
WBGene00018352	F42G2.3.1	fbxc-20	protein_coding	protein_coding	WBGene00018352	0.3805	1222		GO:0005515		FALSE	2.37676	0.550809		II	2419472	2420794	1323	+	0	0	3.46893	0	0	0	0	0	0.168528	0	0	0
WBGene00019341	K02F6.7.1	K02F6.7	protein_coding	protein_coding	WBGene00019341	0.4437	1679				FALSE	2.37676	0.550809		II	2525220	2529255	4036	-	0	0	3.46893	0	0	0	0	0	0.122657	0	0	0
WBGene00019834	R02F2.5.1	R02F2.5	protein_coding	protein_coding	WBGene00019834	0.4908	758		GO:0005515		FALSE	2.37676	0.550809		III	5479318	5480278	961	+	0	0	3.46893	0	0	0	0	0	0.271691	0	0	0
WBGene00019891	R05F9.7.1	R05F9.7	protein_coding	protein_coding	WBGene00019891	0.3371	1074	GO:0007606		GO:0016020; GO:0016021	FALSE	2.37676	0.550809		II	4886276	4888211	1936	+	0	0	3.46893	0	0	0	0	0	0.191752	0	0	0
WBGene00020203	T04B8.1.1	T04B8.1	protein_coding	protein_coding	WBGene00020203	0.3769	804				FALSE	2.37676	0.550809		II	634284	637303	3020	+	0	0	3.46893	0	0	0	0	0	0.256147	0	0	0
WBGene00021878	Y54G2A.13.1	Y54G2A.13	protein_coding	protein_coding	WBGene00021878	0.4481	1928			GO:0016020; GO:0016021	FALSE	2.37676	0.550809		IV	2814568	2819733	5166	-	0	0	3.46893	0	0	0	0	0	0.106816	0	0	0
WBGene00023410	F47F6.9a.1; F47F6.9b.1	clpr-2	protein_coding	protein_coding	WBGene00023410	0.3965	1318	GO:0006508	GO:0004198		FALSE	2.37676	0.550809		II	1259365	1262998	3634	+	0	0	3.46893	0	0	0	0	0	0.156253	0	0	0
WBGene00044287	F21H12.7.1	F21H12.7	protein_coding	protein_coding	WBGene00044287	0.3776	760				FALSE	2.37676	0.550809		II	6091820	6092789	970	+	0	0	3.46893	0	0	0	0	0	0.270976	0	0	0
WBGene00044299	C42D8.9.1	C42D8.9	protein_coding	protein_coding	WBGene00044299	0.4815	731				FALSE	2.37676	0.550809		X	5106260	5107039	780	-	0	0	3.46893	0	0	0	0	0	0.281726	0	0	0
WBGene00194787	T16G1.13.1	T16G1.13	protein_coding	protein_coding	WBGene00194787	0.4083	289				FALSE	2.37676	0.550809		V	12949907	12950246	340	+	0	0	3.46893	0	0	0	0	0	0.712601	0	0	0
WBGene00303425	R02E12.12.1	R02E12.12	protein_coding	protein_coding	WBGene00303425	0.4196	684		GO:0046872		FALSE	2.37676	0.550809		X	4003532	4005066	1535	+	0	0	3.46893	0	0	0	0	0	0.301084	0	0	0
WBGene00009312	F32B4.1.1	F32B4.1	protein_coding	protein_coding	WBGene00009312	0.4159	1248			GO:0016020; GO:0016021	FALSE	2.3766	0.322454		I	11510066	11512769	2704	+	4.40489	6.51436	0	1.03201	0	1.07619	0.192862	0.260058	0	0.0258603	0	0.0298606
WBGene00010784	K11H3.7.1	twk-48	protein_coding	protein_coding	WBGene00010784	0.3675	1309	GO:0006811; GO:0006813; GO:0030322; GO:0071805	GO:0005267; GO:0022841	GO:0005887; GO:0016020; GO:0016021	FALSE	2.37595	0.124303		III	9860730	9863302	2573	+	6.60733	5.86293	17.3446	0	1.31788	4.30475	0.275811	0.223146	0.786638	0	0.0313228	0.113876
WBGene00003380	C10A4.8.1	mnm-2	protein_coding	protein_coding	WBGene00003380	0.4087	920	GO:0006357; GO:0007399; GO:1902669	GO:0000978; GO:0003700; GO:0046872	GO:0005634	TRUE	2.37518	0.00228088	0.00510168	X	7422641	7424881	2241	-	223.548	182.402	300.062	77.4007	5.27153	52.7332	13.2773	9.8777	19.363	2.63101	0.178267	1.98482
WBGene00013579	Y79H2A.2a.1; Y79H2A.2b.1	Y79H2A.2	protein_coding	protein_coding	WBGene00013579	0.3758	575			GO:0016020; GO:0016021	TRUE	2.37506	0.138291	0.193281	III	12028969	12030769	1801	-	7.70855	21.4974	3.46893	5.16004	0	1.07619	0.732538	1.86265	0.35816	0.280641	0	0.0648105
WBGene00022452	Y110A2AR.1.1	Y110A2AR.1	protein_coding	protein_coding	WBGene00022452	0.4792	1083			GO:0016020; GO:0016021	TRUE	2.37363	0.00110134	0.00264334	II	2919710	2920904	1195	+	92.5026	129.636	78.0509	23.7362	30.3113	4.30475	4.66714	5.96362	4.27857	0.685406	0.870761	0.13764
WBGene00010676	K08F4.1.1; K08F4.1.2; K08F4.1.3; K08F4.1.4	ctf-18	protein_coding	protein_coding	WBGene00010676	0.3939	2719		GO:0003677; GO:0005524; GO:0016887	GO:0005634	TRUE	2.37311	8.91862e-36	3.48775e-34	IV	10122120	10126675	4556	-	3695.7	4211.54	4190.46	720.342	801.272	813.597	74.27	77.1694	91.496	8.28503	9.16841	10.3616	1
WBGene00019615	K10B4.3.1	K10B4.3	protein_coding	protein_coding	WBGene00019615	0.4118	2669	GO:0009966	GO:0010314	GO:0005886; GO:0016020	TRUE	2.37281	2.72038e-09	1.55636e-08	II	114429	121222	6794	-	807.746	375.879	626.141	106.297	97.5232	145.285	16.5368	7.01638	13.9275	1.24548	1.1368	1.88494
WBGene00017714	F22F1.2.1	F22F1.2	protein_coding	protein_coding	WBGene00017714	0.4619	1011	GO:0006468; GO:0007165; GO:0016310; GO:0018105	GO:0000166; GO:0004672; GO:0004674; GO:0005524; GO:0016301	GO:0005634; GO:0005737	TRUE	2.37158	0.0271107	0.0466983	X	8149563	8150716	1154	-	12.1134	11.0744	19.0791	2.06402	3.95364	2.15237	0.654699	0.545737	1.12036	0.063845	0.121666	0.0737212
WBGene00020867	T27F7.2a.1; T27F7.2b.1; T27F7.2b.2; T27F7.2c.1; T27F7.2c.2	shc-2	protein_coding	protein_coding	WBGene00020867	0.4249	2052				TRUE	2.37112	1.81865e-11	1.31784e-10	II	4969186	4988934	19749	+	920.073	1230.56	1951.28	278.642	250.398	262.589	24.5002	29.8772	56.4535	4.24653	3.79643	4.43124	1
WBGene00012937	Y47D3A.31.1	Y47D3A.31	protein_coding	protein_coding	WBGene00012937	0.4605	734				FALSE	2.36898	0.499707		III	11156511	11157244	734	-	0	4.56006	1.73446	0	0	1.07619	0	0.309519	0.140287	0	0	0.0507712
WBGene00077703	K08E5.5.1	K08E5.5	protein_coding	protein_coding	WBGene00077703	0.3529	391				TRUE	2.36607	0.0147352	0.0271399	III	10159027	10160482	1456	-	22.0244	39.0862	45.0961	1.03201	6.58941	12.9142	3.07789	4.98035	6.84717	0.0825413	0.524316	1.14372
WBGene00022731	ZK402.5.1	ZK402.5	protein_coding	protein_coding	WBGene00022731	0.4217	1551				TRUE	2.36319	3.78562e-06	1.42703e-05	X	1398824	1400751	1928	-	192.962	329.821	159.492	25.1953	57.756	50.7771	6.79805	10.5945	6.10487	0.50801	1.15853	1.13366
WBGene00011275	R53.6.1; R53.6.2	psf-1	protein_coding	protein_coding	WBGene00011275	0.436	675	GO:0006260; GO:1902983		GO:0000811; GO:0005634	TRUE	2.3608	0.00513194	0.0105735	II	9968659	9969631	973	+	72.6806	103.578	32.9548	18.5762	2.63576	19.3714	5.87921	7.63937	2.89629	0.859994	0.121396	0.993026
WBGene00017290	F09E5.12.1	F09E5.12	protein_coding	protein_coding	WBGene00017290	0.4601	941				TRUE	2.35524	0.000180178	0.000507739	II	5367942	5369102	1161	-	56.7129	93.8069	55.5028	7.22406	18.4503	15.0666	3.2932	4.96659	3.50167	0.24008	0.610011	0.554436
WBGene00007158	B0379.6.1	B0379.6	protein_coding	protein_coding	WBGene00007158	0.4469	405				FALSE	2.35314	0.170638		I	10097317	10097777	461	+	3.30366	6.51436	6.93786	2.06402	0	1.07619	0.445724	0.801365	1.017	0.159376	0	0.0920149
WBGene00020919	W01C8.3.1	set-19	protein_coding	protein_coding	WBGene00020919	0.408	3998				TRUE	2.35112	4.38635e-16	4.82976e-15	X	5675246	5680225	4980	-	3094.98	4108.61	3238.24	865.855	651.034	529.484	42.3001	51.1995	48.0857	6.77279	5.06622	4.58602	1
WBGene00001129	C27H5.7a.1; C27H5.7b.1	dyf-13	protein_coding	protein_coding	WBGene00001129	0.3695	1797	GO:0015031; GO:0035720; GO:0035735	GO:0120170	GO:0005929; GO:0030992; GO:0036064; GO:0042995; GO:0097546	TRUE	2.34975	0.00295594	0.00645324	II	7168817	7171355	2539	-	43.4982	85.3382	218.542	11.3521	39.5364	17.219	1.32266	2.36597	7.22	0.197557	0.684499	0.331807
WBGene00012352	W09C5.5.1	dkf-1	protein_coding	protein_coding	WBGene00012352	0.4317	2314	GO:0002253; GO:0006468; GO:0008340; GO:0010628; GO:0016310; GO:0018105; GO:0035556; GO:0042307; GO:0050830; GO:0089700	GO:0000166; GO:0004672; GO:0004674; GO:0004697; GO:0004698; GO:0004712; GO:0005524; GO:0016301; GO:0016740; GO:0046872; GO:0106310	GO:0005737; GO:0005886; GO:0005938; GO:0016020; GO:0030424; GO:0030425; GO:0043025	TRUE	2.34955	1.88928e-12	1.5158e-11	I	13640297	13648405	8109	-	1203.08	976.503	1186.37	143.449	238.537	278.732	28.4092	21.0244	30.4374	1.93865	3.20712	4.17109	1
WBGene00013443	Y66D12A.17.1	such-1	protein_coding	protein_coding	WBGene00013443	0.447	2483	GO:0007049; GO:0016567; GO:0031145; GO:0045842; GO:0051301; GO:0051321; GO:0070979		GO:0005680	TRUE	2.34951	2.23821e-06	8.75283e-06	III	11512860	11523759	10900	-	273.654	263.18	213.339	57.7925	68.5298	21.5237	6.02213	5.28068	5.10085	0.72788	0.85867	0.30017
WBGene00015975	C18E3.6a.1; C18E3.6a.2; C18E3.6b.1; C18E3.6b.2; C18E3.6b.3; C18E3.6b.4; C18E3.6c	cas-2	protein_coding	protein_coding	WBGene00015975	0.4171	1389	GO:0000902; GO:0007010; GO:0019933; GO:0030833; GO:0045761	GO:0000774; GO:0003779; GO:0008179	GO:0005737	TRUE	2.34749	7.23372e-12	5.4912e-11	I	4190142	4193129	2988	+	482.335	641.665	593.09	81.5287	150.239	106.543	18.9746	23.0155	25.3494	1.83558	3.36513	2.65611	1
WBGene00021270	Y23H5A.3.1	pid-3	protein_coding	protein_coding	WBGene00021270	0.4753	1054	GO:0007049; GO:0007059; GO:0031047; GO:0051301; GO:0051781; GO:0051984; GO:1990511	GO:0005515	GO:0005634; GO:0005737; GO:0048471	TRUE	2.34644	2.45344e-05	8.1488e-05	I	2620654	2621859	1206	+	213.086	189.568	315.672	72.2406	18.4503	49.5046	11.0469	8.96062	17.7806	2.14341	0.544612	1.62641
WBGene00303398	F46H5.11.1	F46H5.11	protein_coding	protein_coding	WBGene00303398	0.4032	1183				TRUE	2.34087	0.219167	0.286434	X	7269667	7272067	2401	-	2.75305	9.12011	41.6271	10.3201	0	0	0.127161	0.384086	2.08901	0.272812	0	0
WBGene00021756	Y50D7A.8.1	Y50D7A.8	protein_coding	protein_coding	WBGene00021756	0.4754	1790				TRUE	2.33892	1.97195e-05	6.64053e-05	III	335956	343241	7286	-	129.944	182.402	183.853	47.4724	13.1788	36.5904	3.9667	5.07681	6.09772	0.829379	0.229059	0.707847
WBGene00005638	T28H11.2.1	srm-1	protein_coding	protein_coding	WBGene00005638	0.3464	996			GO:0016020; GO:0016021	FALSE	2.33886	0.505756		IV	5012549	5014604	2056	+	4.40489	0	1.73446	1.03201	0	0	0.241658	0	0.103384	0.0324033	0	0
WBGene00019828	R02E12.4.1	R02E12.4	protein_coding	protein_coding	WBGene00019828	0.4297	1480	GO:0060271; GO:0060294		GO:0005929; GO:0015630; GO:0031514; GO:0042995	FALSE	2.33586	0.225819		X	4005314	4007634	2321	+	0	9.12011	13.8757	2.06402	1.31788	1.07619	0	0.30701	0.556599	0.0436131	0.0277037	0.0251798
WBGene00000463	C28A5.4a.1; C28A5.4b.1	ceh-43	protein_coding	protein_coding	WBGene00000463	0.4143	1042	GO:0006357; GO:0007155; GO:0009792	GO:0000978; GO:0000981; GO:0003677; GO:0003700	GO:0005634	TRUE	2.33578	3.36566e-05	0.000108768	III	4446637	4449943	3307	-	191.062	197.386	412.802	35.0883	88.2981	35.5142	10.0192	9.43759	23.5193	1.05308	2.63637	1.18021
WBGene00001530	R134.1.1	gcy-3	protein_coding	protein_coding	WBGene00001530	0.3929	3423	GO:0006182; GO:0006468; GO:0007165; GO:0007168; GO:0009190; GO:0035556	GO:0000166; GO:0001653; GO:0004383; GO:0004672; GO:0005524; GO:0005525; GO:0016829	GO:0005886; GO:0016020; GO:0016021	FALSE	2.33375	0.429507		II	9502757	9507281	4525	-	2.75305	0	10.4068	0	2.63576	0	0.0439474	0	0.180492	0	0.0239565	0
WBGene00010989	R03D7.2.1	R03D7.2	protein_coding	protein_coding	WBGene00010989	0.5191	1907	GO:0032508	GO:0043139		TRUE	2.33361	0.00358962	0.00767991	II	10932741	10935140	2400	-	50.1056	115.956	29.4859	20.6402	11.8609	6.45712	1.43569	3.02939	0.917937	0.338476	0.193505	0.11725
WBGene00004873	Y47D3A.26a.1; Y47D3A.26b.1; Y47D3A.26c.1	smc-3	protein_coding	protein_coding	WBGene00004873	0.4225	3135	GO:0006281; GO:0006974; GO:0007049; GO:0007064; GO:0051276; GO:0051301	GO:0003690; GO:0005524; GO:0016887; GO:0061775	GO:0000785; GO:0005634; GO:0005694; GO:0008278; GO:0034990	TRUE	2.33196	2.69398e-33	8.75579e-32	III	11290911	11306145	15235	+	2263.56	2087.2	1921.79	418.996	416.451	411.103	39.453	33.1696	36.3929	4.17962	4.13284	4.54087	1
WBGene00003883	T27B1.1.1	osm-1	protein_coding	protein_coding	WBGene00003883	0.4344	5368	GO:0042073; GO:0043053; GO:0060271; GO:1905515	GO:0003674	GO:0005929; GO:0005930; GO:0030992; GO:0035869; GO:0036064; GO:0042995; GO:0097730	TRUE	2.33057	2.59063e-05	8.55288e-05	X	16541330	16551211	9882	+	200.422	370.667	527.277	34.0563	101.477	82.8664	2.04014	3.44021	5.83144	0.198404	0.588136	0.534554
WBGene00010363	H04D03.2a.1; H04D03.2b.1	H04D03.2	protein_coding	protein_coding	WBGene00010363	0.4672	1200	GO:0010468; GO:0097240	GO:0003682; GO:0035064	GO:0000793; GO:0005637	FALSE	2.33041	0.308393		III	10439339	10442405	3067	-	1.65183	12.3773	1.73446	3.09603	0	0	0.075216	0.513877	0.0858091	0.0806842	0	0
WBGene00012721	Y39E4B.13.1	Y39E4B.13	protein_coding	protein_coding	WBGene00012721	0.4438	516			GO:0016020; GO:0016021	FALSE	2.32936	0.55903		III	13091112	13093659	2548	+	1.10122	1.95431	0	0	0	0	0.116614	0.188694	0	0	0	0
WBGene00044247	F36H2.4.1	F36H2.4	protein_coding	protein_coding	WBGene00044247	0.3278	482			GO:0016020; GO:0016021	FALSE	2.32936	0.55903		I	9249542	9250488	947	-	1.10122	1.95431	0	0	0	0	0.12484	0.202004	0	0	0	0
WBGene00235263	Y66H1A.8a.1; Y66H1A.8b.1	Y66H1A.8	protein_coding	protein_coding	WBGene00235263	0.406	115				FALSE	2.32936	0.55903		IV	451118	454916	3799	-	1.10122	1.95431	0	0	0	0	0.520977	0.842995	0	0	0	0
WBGene00001878	T10C6.11.1	his-4	protein_coding	protein_coding	WBGene00001878	0.4712	520	GO:0006334	GO:0003677; GO:0044877; GO:0046982	GO:0000786; GO:0005634; GO:0005694	TRUE	2.32923	3.65194e-10	2.29987e-09	V	16040029	16040548	520	-	865.252	866.586	539.861	111.402	204.811	137.53	90.9211	83.0275	61.635	6.6997	12.2538	9.15842	1
WBGene00016993	CD4.8.1	CD4.8	protein_coding	protein_coding	WBGene00016993	0.4227	1907				TRUE	2.32825	2.1432e-07	9.73474e-07	V	5599145	5601329	2185	-	116.607	211.09	190.581	27.0672	42.2953	34.622	3.34118	5.51481	5.93306	0.443872	0.690025	0.628677
WBGene00017186	F07B7.2.1	F07B7.2	protein_coding	protein_coding	WBGene00017186	0.5247	951				TRUE	2.32777	0.0767437	0.116383	V	8870259	8872003	1745	+	19.822	12.3773	9.53955	6.70806	0	2.15237	1.13892	0.648423	0.59552	0.220588	0	0.0783723
WBGene00021107	W09B7.2.1	W09B7.2	protein_coding	protein_coding	WBGene00021107	0.5247	951				TRUE	2.32777	0.0767437	0.116383	V	8828165	8829909	1745	+	19.822	12.3773	9.53955	6.70806	0	2.15237	1.13892	0.648423	0.59552	0.220588	0	0.0783723
WBGene00077546	C01A2.9.1	C01A2.9	protein_coding	protein_coding	WBGene00077546	0.3919	273			GO:0016020; GO:0016021	FALSE	2.32492	0.397522		I	13376876	13377347	472	+	1.10122	3.25718	1.73446	1.03201	0	0	0.220413	0.594419	0.377183	0.118219	0	0
WBGene00001950	T24B8.6.1	hlh-3	protein_coding	protein_coding	WBGene00001950	0.3736	819	GO:0006357; GO:0006915; GO:0007399; GO:0030154; GO:0030182; GO:0032094; GO:0042427; GO:0043068; GO:0045944; GO:0046662; GO:0048841	GO:0000977; GO:0000978; GO:0000981; GO:0003677; GO:0003700; GO:0043565; GO:0046982; GO:0046983	GO:0005634; GO:0090575	TRUE	2.32299	0.00824991	0.0161965	II	9086608	9087917	1310	+	17.0689	20.1945	55.5028	5.16004	6.58941	6.45712	1.1388	1.22847	4.02328	0.197031	0.250314	0.273011
WBGene00012005	T24H10.7a.1; T24H10.7b.1; T24H10.7c.1; T24H10.7d.1; T24H10.7e.1; T24H10.7f.1; T24H10.7g.1; T24H10.7h.1; T24H10.7i.1	jun-1	protein_coding	protein_coding	WBGene00012005	0.3945	1029	GO:0006355; GO:0006357; GO:0008340; GO:0009636; GO:0010628; GO:0033120; GO:0042127; GO:0042594; GO:0051726	GO:0000978; GO:0000981; GO:0003677; GO:0003700; GO:0005515; GO:0008134; GO:0043565; GO:0061629	GO:0005634; GO:0005667	TRUE	2.32282	5.75256e-23	1.02406e-21	II	9113219	9132213	18995	+	19323.3	20745.6	14139.9	3709.68	3540.89	3584.28	1026.1	1004.44	815.792	112.742	107.058	120.618	1
WBGene00010934	M162.8.1	fbxa-118	protein_coding	protein_coding	WBGene00010934	0.3887	939				FALSE	2.32151	0.508328		V	19776080	19777174	1095	-	1.10122	0	5.20339	1.03201	0	0	0.0640818	0	0.32898	0.0343703	0	0
WBGene00016436	C35B1.7.1	C35B1.7	protein_coding	protein_coding	WBGene00016436	0.4273	440				FALSE	2.32151	0.508328		IV	4109067	4110471	1405	+	1.10122	0	5.20339	1.03201	0	0	0.136756	0	0.702074	0.0733492	0	0
WBGene00004093	C18E3.7b.1; C18E3.7c.1; C18E3.7c.2; C18E3.7c.3; C18E3.7d.1; C18E3.7d.2	ppw-1	protein_coding	protein_coding	WBGene00004093	0.4505	2453	GO:0035194	GO:0003676; GO:0003723; GO:0003727; GO:0035198		TRUE	2.31986	2.72094e-13	2.36459e-12	I	4185197	4189956	4760	+	1171	1642.77	1462.2	201.636	305.402	349.789	26.0846	33.3651	35.3882	2.57061	3.87345	4.93781	1
WBGene00007966	C36A4.5.1	maph-1.3	protein_coding	protein_coding	WBGene00007966	0.5388	2704	GO:0000226; GO:0007409; GO:0016358; GO:0031114	GO:0003779; GO:0008017	GO:0005829; GO:0005874; GO:0005875; GO:0030425; GO:0043025; GO:0045202	TRUE	2.31706	6.44966e-07	2.74444e-06	III	3844893	3848341	3449	+	213.495	329.013	207.327	75.3935	32.3515	41.8276	4.31426	6.06205	4.55197	0.871951	0.372229	0.535651
WBGene00006444	C33B4.3a.1; C33B4.3b.1; C33B4.3c.1	shn-1	protein_coding	protein_coding	WBGene00006444	0.465	3669	GO:0007622; GO:0030421	GO:0005515; GO:0030160; GO:0035255	GO:0014069; GO:0030054; GO:0031143; GO:0031410; GO:0042995; GO:0043197; GO:0045202; GO:0045211	TRUE	2.31542	2.95954e-10	1.88141e-09	II	11384594	11390862	6269	-	2544.92	1781.03	2064.01	251.81	532.424	500.427	37.9011	24.1844	33.3975	2.1463	4.51475	4.72301	1
WBGene00000417	C48D1.2a.1; C48D1.2b.1	ced-3	protein_coding	protein_coding	WBGene00000417	0.4458	1650	GO:0006508; GO:0006915; GO:0006919; GO:0009792; GO:0010954; GO:0012501; GO:0016540; GO:0030042; GO:0030155; GO:0030163; GO:0031647; GO:0040012; GO:0040028; GO:0040034; GO:0042659; GO:0042981; GO:0043525; GO:0046716; GO:0050807; GO:0050829; GO:0097190; GO:0097194; GO:0097202; GO:1901046; GO:1902742; GO:1904747; GO:1905803; GO:1905808; GO:1905845	GO:0004175; GO:0004197; GO:0005515; GO:0008233; GO:0008234; GO:0008656; GO:0016787; GO:0042802; GO:0097153; GO:0097199; GO:0097200	GO:0005634; GO:0005737; GO:0005739; GO:0008303; GO:0016020; GO:0030054; GO:0031965; GO:0043025; GO:0043204; GO:0045202; GO:0048471; GO:0098793	TRUE	2.31133	0.00449754	0.00940063	IV	13198372	13204133	5762	-	148.665	84.6867	126.616	38.1843	2.63576	31.2094	4.92322	2.55708	4.55568	0.723713	0.0496988	0.654979
WBGene00010077	F55A11.4a.1; F55A11.4a.2; F55A11.4b	F55A11.4	protein_coding	protein_coding	WBGene00010077	0.3992	1877	GO:0055085	GO:0005509	GO:0005739; GO:0005743; GO:0016020; GO:0016021	TRUE	2.30823	0.000333801	0.000892124	V	11770456	11773495	3040	+	319.354	117.259	279.249	40.2483	84.3444	20.4475	9.29681	3.1124	8.83235	0.670577	1.39803	0.377226
WBGene00004051	F20C5.1a.1; F20C5.1b.1; F20C5.1c.1; F20C5.1d.1; F20C5.1e.1; F20C5.1f.1; F20C5.1g.1; F20C5.1h.1; F20C5.1i.1	parg-1	protein_coding	protein_coding	WBGene00004051	0.3957	2562	GO:0005975; GO:0006282; GO:0006974; GO:0009225; GO:0010332; GO:0031056; GO:1990966	GO:0004649; GO:0016787	GO:0005634; GO:0005737; GO:0043005	TRUE	2.305	4.60306e-12	3.55206e-11	IV	8746252	8752676	6425	+	710.288	666.42	678.174	168.218	88.298	158.2	15.1489	12.9593	15.7149	2.05332	1.07225	2.13822	1
WBGene00077699	C45B11.8.1	C45B11.8	protein_coding	protein_coding	WBGene00077699	0.3648	381			GO:0016020; GO:0016021	FALSE	2.30466	0.16815		V	11040773	11041371	599	+	4.9555	3.25718	13.8757	1.03201	0	3.22856	0.710702	0.425923	2.16212	0.0847078	0	0.293433
WBGene00009553	F39B2.1.1	hinf-1	protein_coding	protein_coding	WBGene00009553	0.4134	2153	GO:0006357; GO:0048856	GO:0000978; GO:0000981		TRUE	2.30281	1.85019e-14	1.79439e-13	I	14791040	14794371	3332	+	2914.93	4146.39	2424.78	664.614	715.61	543.475	73.9793	95.9489	66.8617	9.65362	10.3408	8.74099	1
WBGene00018467	F45E1.7a.1; F45E1.7a.2; F45E1.7b.1	sdpn-1	protein_coding	protein_coding	WBGene00018467	0.405	1787	GO:0007010; GO:0030100; GO:0032456; GO:0097320	GO:0005543	GO:0005737; GO:0005768; GO:0005769; GO:0005886; GO:0055037; GO:0055038	TRUE	2.30127	1.33899e-05	4.63259e-05	X	7988931	7998229	9299	-	299.532	278.815	258.435	22.7042	90.9338	57.038	9.15892	7.7733	8.58571	0.397326	1.58316	1.10526
WBGene00202514	T09F5.20a.1; T09F5.20b.1	T09F5.20	protein_coding	protein_coding	WBGene00202514	0.337	300			GO:0016020; GO:0016021	FALSE	2.30068	0.192672		V	15146387	15146861	475	-	14.3159	5.86293	1.73446	0	1.31788	3.22856	2.60749	0.973659	0.343236	0	0.136672	0.372661
WBGene00022033	Y65B4BL.1.1	Y65B4BL.1	protein_coding	protein_coding	WBGene00022033	0.4792	361				FALSE	2.29986	0.335553		I	530969	531998	1030	+	6.05672	5.29848	0	0	1.7322	1.07619	0.91676	0.731236	0	0	0.149284	0.10323
WBGene00012888	Y45F10D.9.1	sas-6	protein_coding	protein_coding	WBGene00012888	0.4077	1555	GO:0007049; GO:0007099; GO:0008104; GO:0051726	GO:0005515; GO:0019904; GO:0042802	GO:0005737; GO:0005813; GO:0005814; GO:0005856	TRUE	2.29957	3.09348e-11	2.18928e-10	IV	13786945	13788727	1783	-	211.435	265.786	190.791	48.5044	42.1722	45.1999	7.4297	8.5156	7.28411	0.975474	0.84376	1.00654	1
WBGene00001857	F59A7.4.1	hil-6	protein_coding	protein_coding	WBGene00001857	0.5221	611	GO:0006334; GO:0030261; GO:0045910	GO:0003677; GO:0003690; GO:0031492	GO:0000786; GO:0005634; GO:0005694	TRUE	2.29932	0.0435753	0.0711849	V	2030619	2031475	857	-	8.80977	14.9838	26.017	2.06402	1.31788	6.45712	0.78786	1.22179	2.52793	0.105642	0.0671055	0.365951
WBGene00006635	C25G6.2.1; C25G6.2.2	tsp-9	protein_coding	protein_coding	WBGene00006635	0.4192	924			GO:0005887; GO:0016020; GO:0016021	TRUE	2.29913	3.08303e-06	1.17963e-05	X	1245984	1247892	1909	+	312.747	431.251	345.158	59.8565	38.2186	122.685	18.4947	23.2526	22.1766	2.02584	1.28684	4.59776
WBGene00009035	F22B3.4.1; F22B3.4.2	gfat-2	protein_coding	protein_coding	WBGene00009035	0.4646	2388	GO:0006002; GO:0006047; GO:0006487; GO:0006541; GO:1901135	GO:0004360; GO:0016740; GO:0097367		TRUE	2.29842	0.026797	0.0462171	IV	11410228	11413001	2774	+	9.91102	31.269	34.6893	5.16004	1.31788	8.6095	0.226782	0.652368	0.862403	0.0675747	0.0171698	0.124844
WBGene00044917	F40F8.12.1	F40F8.12	protein_coding	protein_coding	WBGene00044917	0.4306	353			GO:0016020; GO:0016021	TRUE	2.29806	0.184632	0.24801	II	11130275	11130698	424	+	9.91099	11.7259	1.73446	1.03201	3.95364	0	1.53415	1.65494	0.291702	0.0914268	0.348455	0
WBGene00003980	F09C3.1.1	pes-7	protein_coding	protein_coding	WBGene00003980	0.4838	4277	GO:0007165; GO:0032956; GO:0043087	GO:0005096; GO:0005516; GO:0051015	GO:0005737	TRUE	2.29525	3.18181e-16	3.54206e-15	I	14263301	14271321	8021	+	1769.11	1581.04	1678.96	245.618	378.232	401.418	22.6017	18.4169	23.3051	1.79592	2.75133	3.25	1
WBGene00018830	F54E7.8.1; F54E7.8.2	ska-3	protein_coding	protein_coding	WBGene00018830	0.3969	923				TRUE	2.29078	2.09422e-07	9.52297e-07	III	5677953	5679038	1086	-	202.074	224.094	156.102	53.6644	40.8543	24.7523	11.9564	12.0895	10.0351	1.81725	1.37634	0.92812
WBGene00003442	C34F11.6.1	msp-49	protein_coding	protein_coding	WBGene00003442	0.4902	461			GO:0005737; GO:0005856; GO:0031143; GO:0042995	FALSE	2.28957	0.51275		II	5194332	5194792	461	+	0	2.54697	3.46893	1.14455	0	0	0	0.275256	0.446728	0.0776423	0	0
WBGene00007125	B0250.8.1	B0250.8	protein_coding	protein_coding	WBGene00007125	0.3873	692				FALSE	2.28623	0.562701		V	20469703	20470485	783	-	0	5.86293	0	0	0	1.07619	0	0.422106	0	0	0	0.0538527
WBGene00016947	C55B7.11.1; C55B7.11.2	C55B7.11	protein_coding	protein_coding	WBGene00016947	0.3763	1332				FALSE	2.28608	0.16134		I	6511612	6513843	2232	-	4.9555	12.3773	3.46893	2.06402	0	2.15237	0.203286	0.46295	0.154611	0.048459	0	0.055955
WBGene00000212	ZK455.4.1	asm-2	protein_coding	protein_coding	WBGene00000212	0.403	1933	GO:0006629; GO:0006665; GO:0006685; GO:0008152; GO:0046513	GO:0004767; GO:0008081; GO:0016787; GO:0016798; GO:0046872; GO:0061750	GO:0005576; GO:0005615; GO:0005764	TRUE	2.28522	0.180859	0.243888	X	11321079	11324251	3173	-	11.5628	16.9373	13.8757	0	0	8.6095	0.326857	0.436543	0.42616	0	0	0.154231
WBGene00016350	C33E10.10.1	C33E10.10	protein_coding	protein_coding	WBGene00016350	0.4583	408			GO:0016020	FALSE	2.28481	0.566806		X	17301374	17301923	550	-	1.65183	1.30287	0	0.220715	0	0	0.221224	0.159095	0	0.0169175	0	0
WBGene00021349	Y37E3.5a.1; Y37E3.5b.1; Y37E3.5c.1; Y37E3.5d.1	arl-13	protein_coding	protein_coding	WBGene00021349	0.4605	846	GO:0007606; GO:0042073; GO:0044458; GO:0060271; GO:0097500; GO:1905515	GO:0000166; GO:0003924; GO:0005525	GO:0005886; GO:0005929; GO:0016020; GO:0031528; GO:0042995; GO:0060170; GO:0097543; GO:0097730	TRUE	2.28296	0.000358919	0.000953161	I	2065727	2069049	3323	+	56.713	69.7037	150.898	26.8322	13.1788	16.1428	3.66084	4.10244	10.583	0.991276	0.484365	0.660355
WBGene00006496	C14A11.3a.1; C14A11.3b.1; C14A11.3c.1	cgef-1	protein_coding	protein_coding	WBGene00006496	0.4339	2521	GO:0008104; GO:0043547	GO:0005085	GO:0005654; GO:0005737; GO:0005938	TRUE	2.28147	2.15978e-09	1.24681e-08	X	2772042	2799247	27206	+	3110.95	5386.73	2716.17	582.053	1013.45	712.436	67.4288	106.455	63.9637	7.22029	12.507	9.78585
WBGene00016836	C50F2.2.1	C50F2.2	protein_coding	protein_coding	WBGene00016836	0.448	3205				TRUE	2.28072	1.09407e-16	1.2668e-15	I	3881816	3888313	6498	+	1285.68	1863.11	1349.41	353.979	295.205	276.58	21.9194	28.9617	24.9957	3.45394	2.86563	2.98826	1
WBGene00010263	F58G1.1.1	wago-4	protein_coding	protein_coding	WBGene00010263	0.4737	3369	GO:0031047; GO:0031048; GO:0035194; GO:0060966	GO:0003676; GO:0003723; GO:0003727; GO:0035198	GO:0005737; GO:0048471	TRUE	2.27378	1.12227e-08	5.95157e-08	II	12919551	12923377	3827	+	387.63	315.947	251.497	89.7848	46.1259	61.3427	6.28698	4.67225	4.43181	0.833425	0.425958	0.630503
WBGene00003111	Y71G12B.20a.1; Y71G12B.20b.1; Y71G12B.20c.1; Y71G12B.20d.1	mab-20	protein_coding	protein_coding	WBGene00003111	0.4517	1696	GO:0001755; GO:0007411; GO:0007413; GO:0010172; GO:0016331; GO:0030155; GO:0030334; GO:0030335; GO:0032956; GO:0045138; GO:0048843; GO:0050919; GO:0071526; GO:0090597; GO:1902667	GO:0030215; GO:0045499	GO:0005576; GO:0005615; GO:0009986	TRUE	2.27341	1.27797e-24	2.47886e-23	I	1644588	1651394	6807	-	6939.9	9137.06	7314.23	1477.84	1763.33	1598.14	223.59	268.407	256.031	27.25	32.3467	32.6297	1
WBGene00013727	Y111B2A.1.1	Y111B2A.1	protein_coding	protein_coding	WBGene00013727	0.4167	1291	GO:0006468; GO:0016310	GO:0000166; GO:0004672; GO:0004674; GO:0005524; GO:0016301	GO:0005634	TRUE	2.27293	0.0381687	0.0632648	III	12492793	12495640	2848	-	20.3726	7.1658	26.017	5.16004	1.31788	4.30475	0.862275	0.276536	1.19641	0.124995	0.0317595	0.115464
WBGene00044423	F53F10.8.1; F53F10.8.2	F53F10.8	protein_coding	protein_coding	WBGene00044423	0.3693	711			GO:0016020; GO:0016021	TRUE	2.27163	1.14723e-09	6.84445e-09	I	3828239	3829308	1070	+	151.418	180.448	149.164	38.1843	28.9934	32.2856	11.6286	12.6354	12.4462	1.67832	1.26779	1.5713
WBGene00019348	K02H11.4.1	K02H11.4	protein_coding	protein_coding	WBGene00019348	0.398	1515		GO:0016740; GO:0016757	GO:0016020; GO:0016021	FALSE	2.2705	0.387566		V	1528824	1531259	2436	-	0	18.2402	6.93786	5.16004	0	0	0	0.599834	0.27187	0.106514	0	0
WBGene00021814	Y53G8AR.7a.1; Y53G8AR.7b.1	Y53G8AR.7	protein_coding	protein_coding	WBGene00021814	0.4134	952	GO:0006810; GO:0055085	GO:0022857	GO:0016020; GO:0016021	TRUE	2.27007	0.0403736	0.0664831	III	3282308	3290215	7908	+	49.0043	10.423	31.2203	2.06402	2.63576	13.9904	2.81122	0.545181	1.94591	0.0677662	0.0860923	0.508618
WBGene00004337	C54G10.2a.1; C54G10.2b	rfc-1	protein_coding	protein_coding	WBGene00004337	0.4208	2648	GO:0006260; GO:0006281	GO:0000166; GO:0003677; GO:0003689; GO:0005524; GO:0016887	GO:0005634; GO:0005663	TRUE	2.27	1.14893e-13	1.04255e-12	V	14642739	14645979	3241	-	5336.52	4910.53	6955.2	1536.66	894.842	1133.23	110.12	92.3897	155.934	18.1478	10.5136	14.8192	1
WBGene00016538	C39F7.1a.1; C39F7.1b.1; C39F7.1c.1	C39F7.1	protein_coding	protein_coding	WBGene00016538	0.4885	819			GO:0016020; GO:0016021	TRUE	2.26953	0.046096	0.0747507	V	1260465	1262616	2152	+	89.7494	126.379	166.509	6.19205	72.4835	1.07619	5.98788	7.68783	12.0698	0.236437	2.75346	0.0455019
WBGene00004953	F32H2.3.1; F32H2.3.2	spd-2	protein_coding	protein_coding	WBGene00004953	0.4264	2633	GO:0000226; GO:0007049; GO:0007098; GO:0007099; GO:0008104; GO:0009792; GO:0040025; GO:0051298; GO:0071539; GO:0090222; GO:0090307	GO:0005515; GO:0019901	GO:0000242; GO:0005737; GO:0005813; GO:0005814; GO:0005815; GO:0005856	TRUE	2.26809	5.61736e-30	1.49669e-28	I	8966985	8970158	3174	-	4628.98	5313.12	4710.8	1126.95	981.822	933.054	96.0639	100.534	106.217	13.3851	11.6013	12.271	1
WBGene00006540	F58A4.8.1	tbg-1	protein_coding	protein_coding	WBGene00006540	0.4169	1480	GO:0000070; GO:0000212; GO:0000226; GO:0000278; GO:0007017; GO:0007020; GO:0007052; GO:0009794; GO:0016048; GO:0031122; GO:0051661; GO:1903436	GO:0000166; GO:0003924; GO:0005200; GO:0005525	GO:0000930; GO:0005634; GO:0005737; GO:0005813; GO:0005815; GO:0005819; GO:0005856; GO:0005874; GO:0005912; GO:0030054; GO:0030056	TRUE	2.26626	6.70307e-34	2.27623e-32	III	9626532	9629154	2623	-	3705.61	3887.12	3654.52	710.022	843.444	785.617	136.812	130.852	146.594	15.0029	17.7304	18.3812	1
WBGene00013710	Y106G6G.1.1	Y106G6G.1	protein_coding	protein_coding	WBGene00013710	0.4365	1196				FALSE	2.2658	0.170342		I	10328984	10330370	1387	+	5.50611	22.1488	3.46893	5.16004	1.31788	0	0.251559	0.922642	0.172192	0.134923	0.0342822	0
WBGene00013844	ZC47.13a.1; ZC47.13b	fbxa-50	protein_coding	protein_coding	WBGene00013844	0.3486	920				FALSE	2.26344	0.273084		III	1287299	1288523	1225	-	3.30366	5.21149	6.93786	3.09603	0	0	0.196109	0.282067	0.447456	0.105183	0	0
WBGene00044771	T23E7.5.1	tmem-218	protein_coding	protein_coding	WBGene00044771	0.378	381	GO:1905515		GO:0016020; GO:0016021; GO:0035869	TRUE	2.26303	0.0974185	0.14272	X	17650178	17651594	1417	+	8.25916	10.423	27.7514	3.09603	6.58941	0	1.1845	1.36295	4.32424	0.254123	0.538077	0
WBGene00018957	F56C11.5a.1; F56C11.5a.2; F56C11.5b.1	F56C11.5	protein_coding	protein_coding	WBGene00018957	0.4282	1041			GO:0016020; GO:0016021	TRUE	2.26206	4.40705e-19	5.92971e-18	I	178538	182161	3624	+	457.558	513.983	447.492	102.169	101.477	92.5521	24.0171	24.5987	25.5202	3.06925	3.03277	3.07866	1
WBGene00012813	Y43F8B.2a.1; Y43F8B.2b.1; Y43F8B.2c.1; Y43F8B.2c.2; Y43F8B.2d.1; Y43F8B.2e.1; Y43F8B.2e.2; Y43F8B.2f.1; Y43F8B.2f.2; Y43F8B.2f.3	Y43F8B.2	protein_coding	protein_coding	WBGene00012813	0.4266	1010	GO:0045087; GO:0050790; GO:0060828	GO:0005515; GO:0019207; GO:0051018	GO:0005737; GO:0055120	TRUE	2.26193	4.81536e-16	5.26865e-15	V	19519925	19533110	13186	-	22233.7	30904.8	19793.7	4377.78	5962.1	4867.59	1202.86	1524.46	1163.47	135.549	183.654	166.885	1
WBGene00020629	T20F5.7.1	T20F5.7	protein_coding	protein_coding	WBGene00020629	0.4158	1294	GO:0016567	GO:0046872; GO:0061630		TRUE	2.26127	9.88715e-07	4.10486e-06	I	3925434	3927887	2454	-	433.881	276.86	317.407	112.489	55.351	46.276	18.3215	10.6596	14.5623	2.71857	1.33081	1.23836
WBGene00019314	K02E7.10.1	K02E7.10	protein_coding	protein_coding	WBGene00019314	0.4244	900	GO:0006508; GO:0051603	GO:0004197; GO:0008234	GO:0005615; GO:0005764; GO:0016020; GO:0016021	FALSE	2.26104	0.125576		II	1065566	1066998	1433	-	3.85428	23.4517	8.67232	3.09603	0	4.30475	0.234005	1.29821	0.572061	0.107579	0	0.165627
WBGene00045481	M153.5.1	M153.5	protein_coding	protein_coding	WBGene00045481	0.4231	702				FALSE	2.25932	0.197463		X	12144114	12145940	1827	+	3.30366	159.602	12.1412	1.03201	0	35.5142	0.257149	11.327	1.02678	0.0459739	0	1.75182
WBGene00012373	W09H1.3.1	W09H1.3	protein_coding	protein_coding	WBGene00012373	0.4956	343			GO:0005615	TRUE	2.25655	0.0463798	0.0750957	II	13184429	13185023	595	+	9.68948	19.8265	7.83521	2.32018	4.36904	2.31816	1.54359	2.87982	1.35614	0.21154	0.396292	0.234032
WBGene00017236	F08B4.4.1	nlp-60	protein_coding	protein_coding	WBGene00017236	0.3355	453	GO:0007218		GO:0016020; GO:0016021	FALSE	2.25428	0.413376		IV	8678695	8679325	631	-	2.75305	1.30287	1.73446	0	0	1.07619	0.332079	0.14329	0.227309	0	0	0.082265
WBGene00013405	Y63D3A.4.1	tdpt-1	protein_coding	protein_coding	WBGene00013405	0.4499	1307	GO:0006281; GO:0006302; GO:0006974; GO:0090305	GO:0003697; GO:0003824; GO:0004518; GO:0016787; GO:0042802; GO:0046872; GO:0070260	GO:0005634; GO:0005737; GO:0016605	TRUE	2.25362	3.61235e-06	1.36638e-05	I	14097492	14101090	3599	-	99.6605	134.847	84.9887	23.7362	27.6755	16.1428	4.16652	5.1402	3.86042	0.567938	0.658784	0.42769
WBGene00012976	Y48A6C.3.1	sup-35	protein_coding	protein_coding	WBGene00012976	0.403	1263		GO:0008017	GO:0005634; GO:0005737; GO:0005739; GO:0005876; GO:0097431	TRUE	2.24028	4.72702e-06	1.75193e-05	III	11116994	11119222	2229	-	148.114	117.259	78.0509	21.6722	30.3113	21.5237	6.40795	4.62546	3.6688	0.536617	0.746662	0.59012
WBGene00044032	T21B4.17.1	ceh-99	protein_coding	protein_coding	WBGene00044032	0.4331	1734	GO:0006357; GO:0007417; GO:0030182	GO:0000978; GO:0000981; GO:0003677	GO:0005634	TRUE	2.23947	0.0679046	0.104584	II	12520004	12524478	4475	+	4.41721	15.6446	24.2825	1.03785	3.96066	4.30475	0.139195	0.4495	0.831368	0.0187176	0.0710626	0.0859655
WBGene00005929	C03A7.5.1	srx-38	protein_coding	protein_coding	WBGene00005929	0.3571	885			GO:0016020; GO:0016021	FALSE	2.23902	0.57485		V	5154057	5155516	1460	-	0	1.30287	1.73446	0	0	0	0	0.0733453	0.116351	0	0	0
WBGene00009150	F26D2.12a.1; F26D2.12b.1; F26D2.12c.1	clec-234	protein_coding	protein_coding	WBGene00009150	0.4973	683		GO:0030246		FALSE	2.23902	0.57485		V	16432009	16433572	1564	-	0	1.30287	1.73446	0	0	0	0	0.0950375	0.150763	0	0	0
WBGene00019722	M02A10.1.1	M02A10.1	protein_coding	protein_coding	WBGene00019722	0.4326	393			GO:0016020; GO:0016021	FALSE	2.23902	0.57485		X	706817	707540	724	+	0	1.30287	1.73446	0	0	0	0	0.165167	0.262012	0	0	0
WBGene00001696	F46H5.6.1	grd-7	protein_coding	protein_coding	WBGene00001696	0.494	1251	GO:0007154	GO:0005102; GO:0005515	GO:0005576	FALSE	2.2377	0.341358		X	7267989	7269479	1491	-	18.1702	0	1.73446	2.06402	0	2.15237	0.793646	0	0.0823109	0.0515966	0	0.059578
WBGene00009162	F26E4.7a.1; F26E4.7b.1	F26E4.7	protein_coding	protein_coding	WBGene00009162	0.3725	2262	GO:0007155; GO:0030198	GO:0005201; GO:0050839	GO:0005615; GO:0031012	TRUE	2.23619	0.0013546	0.00318436	I	9774165	9779541	5377	+	344.132	1716.54	294.86	112.489	160.782	227.075	8.313	37.8071	7.73877	1.55519	2.2114	3.47619
WBGene00018153	F37C12.10.1	F37C12.10	protein_coding	protein_coding	WBGene00018153	0.3728	507				TRUE	2.236	0.0399939	0.0659206	III	7187841	7188430	590	-	15.4171	9.12011	17.3446	4.12804	1.31788	3.22856	1.66158	0.896201	2.03098	0.254625	0.0808708	0.220509
WBGene00002226	C41G7.2.1; C41G7.2.2	klp-16	protein_coding	protein_coding	WBGene00002226	0.4885	2032	GO:0007018; GO:0007059; GO:0090307	GO:0000166; GO:0003774; GO:0003777; GO:0005524; GO:0008017; GO:0016887	GO:0005634; GO:0005815; GO:0005871; GO:0005874; GO:0043025; GO:0072686	TRUE	2.23558	2.24157e-30	6.10665e-29	I	9512428	9514755	2328	+	1538.2	1692.04	1527.07	352.614	326.145	331.944	41.3633	41.4859	44.6155	5.42677	4.99355	5.65675	1
WBGene00021541	Y42H9B.3.1	Y42H9B.3	protein_coding	protein_coding	WBGene00021541	0.3799	1153				TRUE	2.23467	0.0320833	0.0542388	IV	8011031	8012430	1400	-	26.9799	26.0575	20.8136	1.03201	11.8609	3.22856	1.27861	1.12594	1.07168	0.027991	0.320046	0.0969628
WBGene00005647	C03G6.19.1	srp-6	protein_coding	protein_coding	WBGene00005647	0.3849	1307	GO:0006508; GO:0010466; GO:0010951	GO:0004867; GO:0005515; GO:0008233; GO:0030414	GO:0005615	TRUE	2.23242	1.01739e-10	6.79177e-10	V	7384232	7386173	1942	-	2198.04	1697.64	2912.16	372.555	434.901	640.331	91.8936	64.7119	132.279	8.91415	10.3523	16.965	1
WBGene00015011	B0041.8.1; B0041.8.2	B0041.8	protein_coding	protein_coding	WBGene00015011	0.3944	828				TRUE	2.23182	3.85891e-18	4.9106e-17	I	4647280	4648275	996	+	1656.24	1495.05	2017.19	425.188	359.781	314.247	109.299	89.9576	144.632	16.0589	13.5186	13.1422	1
WBGene00002994	T09A5.10.1; T09A5.10.2	lin-5	protein_coding	protein_coding	WBGene00002994	0.453	2646	GO:0000003; GO:0000022; GO:0007049; GO:0007399; GO:0008406; GO:0032880; GO:0040001; GO:0040011; GO:0051296; GO:0051301	GO:0005515; GO:0070840	GO:0000775; GO:0000776; GO:0000793; GO:0000922; GO:0005694; GO:0005737; GO:0005815; GO:0005819; GO:0005828; GO:0005856; GO:0005938; GO:0051233	TRUE	2.23137	1.63429e-24	3.14485e-23	II	7860574	7863563	2990	+	5895.94	5557.41	6008.18	1148.63	1473.4	1097.71	121.756	104.64	134.804	13.5755	17.3242	14.3656	1
WBGene00015230	B0511.4.1	tag-344	protein_coding	protein_coding	WBGene00015230	0.415	1188	GO:0006468; GO:0016310; GO:0035556	GO:0000166; GO:0004672; GO:0004674; GO:0005524; GO:0016301		FALSE	2.2312	0.566712		I	10644245	10645617	1373	+	0	0	10.4068	0	0	2.15237	0	0	0.520055	0	0	0.0627375
WBGene00012195	W02A11.5.1; W02A11.5.2	bath-34	protein_coding	protein_coding	WBGene00012195	0.3882	1238				TRUE	2.2311	0.00459423	0.00958291	I	12749890	12752087	2198	+	27.5305	190.219	86.7232	16.5121	30.3113	18.2952	1.21512	7.65504	4.15876	0.417107	0.761739	0.511731
WBGene00007595	C15A7.2.1	C15A7.2	protein_coding	protein_coding	WBGene00007595	0.3988	1700	GO:0007186; GO:0019236		GO:0016020; GO:0016021	TRUE	2.23049	0.0414356	0.0679918	X	12070743	12073863	3121	-	42.397	20.846	52.0339	13.4161	0	10.7619	1.36274	0.610923	1.81713	0.246799	0	0.219212
WBGene00010839	M03C11.2.1; M03C11.2.2	chl-1	protein_coding	protein_coding	WBGene00010839	0.4474	2616	GO:0006139; GO:0006281; GO:0006974; GO:0008284; GO:0032508; GO:0034085	GO:0000166; GO:0003676; GO:0003677; GO:0003678; GO:0004386; GO:0005524; GO:0016787; GO:0016818; GO:0016887	GO:0005634	TRUE	2.22637	2.26899e-12	1.80611e-11	III	10399174	10405240	6067	-	310.353	365.885	253.867	63.2541	69.8477	66.7235	6.48253	6.9682	5.76125	0.756164	0.830688	0.883216	1
WBGene00008450	E01G6.2.1	E01G6.2	protein_coding	protein_coding	WBGene00008450	0.3962	1045				TRUE	2.22581	8.70463e-16	9.25668e-15	X	12256644	12258971	2328	+	1691.48	1330.23	1134.34	250.778	321.563	317.475	88.4454	63.4198	64.443	7.50479	9.57355	10.5201	1
WBGene00000239	C05D2.4a.1; C05D2.4b.1	bas-1	protein_coding	protein_coding	WBGene00000239	0.4382	1670	GO:0006520; GO:0006584; GO:0006585; GO:0007606; GO:0018991; GO:0019752; GO:0031987; GO:0034607; GO:0042416; GO:0042427	GO:0003824; GO:0004058; GO:0016829; GO:0016830; GO:0016831; GO:0030170; GO:0036468	GO:0005737	TRUE	2.22525	0.0493975	0.0793173	III	5612274	5614700	2427	+	8.80977	21.4974	26.017	8.25607	1.31788	2.15237	0.288253	0.641332	0.924888	0.154604	0.0245518	0.04463
WBGene00010423	H36L18.1.1	zmp-5	protein_coding	protein_coding	WBGene00010423	0.4195	1323	GO:0006508; GO:0030198; GO:0030574	GO:0004222; GO:0008233; GO:0008237; GO:0008270; GO:0016787; GO:0046872	GO:0005615; GO:0016020; GO:0016021; GO:0031012	TRUE	2.22402	0.000239539	0.000659534	X	12647117	12651487	4371	+	246.123	1052.72	470.04	68.1126	139.695	171.114	10.1652	39.6431	21.0923	1.61002	3.28508	4.47869
WBGene00004960	Y66D12A.20.1	spe-6	protein_coding	protein_coding	WBGene00004960	0.4707	1211	GO:0006468; GO:0007165; GO:0007283; GO:0016310; GO:0018105; GO:0030154; GO:0032880; GO:0048515; GO:0051308	GO:0000166; GO:0004672; GO:0004674; GO:0004712; GO:0005524; GO:0016301; GO:0016740; GO:0106310	GO:0005634; GO:0005737	TRUE	2.22336	0.000189336	0.000530465	III	11505535	11508919	3385	+	83.6928	99.0183	91.9266	9.28808	32.947	17.219	3.77633	4.07366	4.50657	0.239854	0.846438	0.492367
WBGene00011155	R09B3.2.1	rbm-3.1	protein_coding	protein_coding	WBGene00011155	0.4807	466	GO:0098789	GO:0003676; GO:0003723; GO:0003729	GO:0005847	TRUE	2.22154	1.43847e-07	6.67121e-07	I	11909366	11910104	739	-	809.948	1183.66	593.187	258.002	119.927	176.495	94.9723	126.548	75.5709	17.3142	8.00673	13.1151
WBGene00195241	Y113G7B.27a.1; Y113G7B.27b.1	Y113G7B.27	protein_coding	protein_coding	WBGene00195241	0.3564	225				TRUE	2.2191	0.00971299	0.0187203	V	20192830	20193349	520	+	29.1824	18.8917	45.0961	7.22406	2.63576	9.68568	7.08702	4.18313	11.8989	1.00407	0.364458	1.49064
WBGene00001365	Y105E8A.22.1	exc-4	protein_coding	protein_coding	WBGene00001365	0.3295	2109	GO:0002064; GO:0006811; GO:0006821; GO:0034220; GO:0034765; GO:0035150	GO:0005244; GO:0005254	GO:0005737; GO:0005764; GO:0005887; GO:0016020; GO:0016021; GO:0016324; GO:0034707; GO:0043296	TRUE	2.21833	1.97847e-05	6.65881e-05	I	14511431	14518719	7289	-	109.572	132.242	60.7062	22.7042	22.404	20.4476	2.83888	3.12396	1.70886	0.336662	0.3305	0.33573
WBGene00020378	T09B4.4.1	T09B4.4	protein_coding	protein_coding	WBGene00020378	0.3462	546	GO:0050790	GO:0005509; GO:0030234		TRUE	2.21757	0.000669663	0.001685	I	6167940	6168642	703	+	115.628	299.661	135.288	17.5442	34.2649	66.7236	11.5717	27.3433	14.7101	1.00486	1.95245	4.23168
WBGene00007225	C01G6.3.1; C01G6.3.2	C01G6.3	protein_coding	protein_coding	WBGene00007225	0.4189	1282				TRUE	2.21716	0.268134	0.339984	II	9269888	9271267	1380	+	9.36039	18.8917	1.73446	0	0	6.45712	0.398962	0.734168	0.0803205	0	0	0.174412
WBGene00019947	R08C7.3.1; R08C7.3.2; R08C7.3.3	htz-1	protein_coding	protein_coding	WBGene00019947	0.4363	864	GO:0009996; GO:0045892	GO:0003677; GO:0046982	GO:0000785; GO:0000786; GO:0000793; GO:0005634; GO:0005694	TRUE	2.21286	1.31121e-13	1.17834e-12	IV	4445990	4446997	1008	+	1199.78	1375.83	953.955	302.379	195.047	263.665	75.8512	79.3076	65.5258	10.9409	7.02098	10.5637	1
WBGene00020628	T20F5.6.1	T20F5.6	protein_coding	protein_coding	WBGene00020628	0.4448	2817	GO:0016567	GO:0046872; GO:0061630		TRUE	2.21148	7.47283e-23	1.32253e-21	I	3920177	3925162	4986	-	2973.85	3109.31	2880.94	597.533	568.007	769.474	57.6843	54.9908	60.7152	6.63346	6.27321	9.45872	1
WBGene00003687	H27C11.1a.1; H27C11.1b.1; H27C11.1b.2; H27C11.1b.3	nhr-97	protein_coding	protein_coding	WBGene00003687	0.3871	2052	GO:0006355	GO:0003677; GO:0003700; GO:0008270; GO:0043565; GO:0046872	GO:0005634	TRUE	2.21082	2.91299e-09	1.65717e-08	IV	9757648	9764494	6847	+	3511.24	2046.17	2128.19	408.676	494.205	757.636	93.4994	49.6795	61.5718	6.22825	7.49295	12.7852
WBGene00021435	Y39A3A.4.1	Y39A3A.4	protein_coding	protein_coding	WBGene00021435	0.4378	996	GO:0006470; GO:0035335	GO:0004725		FALSE	2.20846	0.534059		III	2073009	2076520	3512	-	0	3.90862	1.73446	0	1.31788	0	0	0.195514	0.103384	0	0.0411661	0
WBGene00018425	F44E7.3.1	F44E7.3	protein_coding	protein_coding	WBGene00018425	0.3717	374				FALSE	2.20839	0.161986		V	5771945	5772497	553	+	3.85428	16.9373	8.67232	5.16004	0	1.07619	0.563114	2.25625	1.37662	0.431466	0	0.0996418
WBGene00019101	F59B1.10.1	F59B1.10	protein_coding	protein_coding	WBGene00019101	0.3988	1354				TRUE	2.20822	0.101643	0.148067	V	3644745	3647954	3210	-	22.575	72.3094	8.67232	5.16004	0	17.219	0.911036	2.66066	0.380247	0.119179	0	0.440367
WBGene00011326	T01D3.1a.1; T01D3.1b.1	T01D3.1	protein_coding	protein_coding	WBGene00011326	0.4075	5677	GO:0008045	GO:0005509	GO:0016020	TRUE	2.20578	0.000324949	0.000870961	V	13689892	13703330	13439	+	150.317	251.455	659.096	51.6004	101.477	76.4093	1.44682	2.20676	6.89253	0.284249	0.556124	0.466072
WBGene00011508	T05H10.3.1	T05H10.3	protein_coding	protein_coding	WBGene00011508	0.4199	624				TRUE	2.20463	0.176964	0.239328	II	8049049	8050564	1516	-	3.85428	7.81724	43.3616	10.3201	1.31788	0	0.337508	0.62414	4.12544	0.517206	0.0657075	0
WBGene00006981	C09C7.1.1	zig-4	protein_coding	protein_coding	WBGene00006981	0.4027	1038	GO:0007155; GO:0007411; GO:0048666		GO:0005576; GO:0005886	TRUE	2.20006	4.07163e-06	1.52488e-05	X	7925434	7926594	1161	+	2402.31	3046.12	1165.56	734.79	333.424	371.285	126.461	146.205	66.6632	22.1376	9.99362	12.3861
WBGene00045382	T05E12.8.1; T05E12.8.2	T05E12.8	protein_coding	protein_coding	WBGene00045382	0.464	349			GO:0016020; GO:0016021	TRUE	2.19801	0.0165479	0.0301081	V	17068627	17069533	907	+	27.5305	16.2859	50.2994	3.09603	5.27153	11.8381	4.30421	2.32155	8.54407	0.277027	0.469259	1.17289
WBGene00018526	F47B3.2.1	F47B3.2	protein_coding	protein_coding	WBGene00018526	0.4402	418	GO:0006470; GO:0035335	GO:0004725		FALSE	2.19762	0.436172		I	3970374	3971302	929	+	1.41979	0.458858	2.88906	0	0	1.23093	0.185599	0.054691	0.410327	0	0	0.101973
WBGene00013156	Y53F4B.9.1	Y53F4B.9	protein_coding	protein_coding	WBGene00013156	0.5015	3667		GO:0003677	GO:0005634	TRUE	2.19608	1.15006e-12	9.42035e-12	II	15004869	15010416	5548	-	1015.33	914.617	695.52	195.05	147.603	230.304	15.1293	12.4263	11.2602	1.66341	1.2523	2.17478	1
WBGene00007115	B0198.2a.1; B0198.2b.1	B0198.2	protein_coding	protein_coding	WBGene00007115	0.4283	1230			GO:0016020; GO:0016021	TRUE	2.19429	6.18219e-07	2.64083e-06	X	12028711	12031498	2788	+	149.215	117.91	126.616	19.6082	36.9007	30.1332	6.62879	4.77594	6.11128	0.498536	0.933367	0.848333
WBGene00010447	K01A6.5a.1; K01A6.5b	K01A6.5	protein_coding	protein_coding	WBGene00010447	0.42	681				TRUE	2.19423	0.0802101	0.120793	IV	11742706	11743789	1084	+	12.664	13.0287	24.2825	3.09603	0	7.53331	1.01613	0.953165	2.11688	0.142175	0	0.383058
WBGene00001612	C06E1.4.1	glr-1	protein_coding	protein_coding	WBGene00001612	0.3875	2986	GO:0001966; GO:0006811; GO:0006972; GO:0007614; GO:0007631; GO:0008306; GO:0008344; GO:0009612; GO:0010035; GO:0034220; GO:0035235; GO:0035249; GO:0043056; GO:0043058; GO:0046959; GO:0050913; GO:1905850; GO:1905852	GO:0004970; GO:0004971; GO:0005216; GO:0005515; GO:0015276; GO:0019899; GO:0038023	GO:0005768; GO:0005783; GO:0005886; GO:0008328; GO:0009986; GO:0014069; GO:0016020; GO:0016021; GO:0030054; GO:0030425; GO:0032589; GO:0042995; GO:0043005; GO:0043025; GO:0043204; GO:0045202; GO:0045211; GO:0055037; GO:0097038	TRUE	2.1931	1.94212e-05	6.55198e-05	III	8584186	8588642	4457	-	220.795	294.449	109.271	31.9923	52.7153	52.7332	4.0404	4.91286	2.17253	0.335058	0.54925	0.611533
WBGene00015956	C18B2.5a.1; C18B2.5b.1	C18B2.5	protein_coding	protein_coding	WBGene00015956	0.4527	2274	GO:0017157; GO:0034613; GO:0061640	GO:0003924; GO:0060090	GO:0005940; GO:0008021; GO:0015630; GO:0031105; GO:0032153	TRUE	2.19272	0.0196122	0.0350211	X	3606668	3611092	4425	-	129.394	1485.93	107.537	57.7925	139.695	179.724	3.10919	32.5552	2.80747	0.794778	1.91123	2.73678
WBGene00000440	D1007.1.1	ceh-17	protein_coding	protein_coding	WBGene00000440	0.417	717	GO:0006357; GO:0007399; GO:0007411; GO:0030516; GO:0045944; GO:0048666	GO:0000977; GO:0000981; GO:0001228; GO:0003677; GO:0003700; GO:0005515	GO:0005634	FALSE	2.19184	0.583192		I	4568962	4570027	1066	-	2.75305	0	0	0	0	0	0.209808	0	0	0	0	0
WBGene00000821	Y47H9C.6a.1; Y47H9C.6b	csp-3	protein_coding	protein_coding	WBGene00000821	0.4146	833	GO:0006508; GO:0006915; GO:0006919; GO:0040019; GO:0043066; GO:0043525; GO:0090326; GO:0097190; GO:0097194; GO:1901046; GO:1904746; GO:1904747; GO:1990001	GO:0004197; GO:0005515; GO:0008234; GO:0035375; GO:0043027; GO:0089720; GO:0097153; GO:0097199; GO:0097200	GO:0005737	FALSE	2.19184	0.583192		I	11888501	11890558	2058	-	2.75305	0	0	0	0	0	0.180482	0	0	0	0	0
WBGene00008090	C44C10.10.1	C44C10.10	protein_coding	protein_coding	WBGene00008090	0.4167	384			GO:0016020; GO:0016021	FALSE	2.19184	0.583192		X	11690314	11690789	476	+	2.75305	0	0	0	0	0	0.39175	0	0	0	0	0
WBGene00011249	R11G10.2.1	R11G10.2	protein_coding	protein_coding	WBGene00011249	0.3943	1628	GO:0008150	GO:0003674; GO:0008430	GO:0005575	FALSE	2.19184	0.583192		V	13511905	13515215	3311	-	2.75305	0	0	0	0	0	0.0924029	0	0	0	0	0
WBGene00011313	T01B7.8.1	T01B7.8	protein_coding	protein_coding	WBGene00011313	0.4434	636				FALSE	2.19184	0.583192		II	8736726	8737556	831	-	2.75305	0	0	0	0	0	0.236528	0	0	0	0	0
WBGene00011693	T10G3.2.1	T10G3.2	protein_coding	protein_coding	WBGene00011693	0.3895	1086	GO:0007606		GO:0016020; GO:0016021	FALSE	2.19184	0.583192		V	13477384	13479858	2475	-	2.75305	0	0	0	0	0	0.138519	0	0	0	0	0
WBGene00012617	Y38H6C.4.1	Y38H6C.4	protein_coding	protein_coding	WBGene00012617	0.4619	223				FALSE	2.19184	0.583192		V	20504875	20505097	223	-	2.75305	0	0	0	0	0	0.674583	0	0	0	0	0
WBGene00013393	Y62H9A.5.1	Y62H9A.5	protein_coding	protein_coding	WBGene00013393	0.4364	582				FALSE	2.19184	0.583192		X	11882144	11882917	774	-	2.75305	0	0	0	0	0	0.258474	0	0	0	0	0
WBGene00013472	Y68A4B.3.1	Y68A4B.3	protein_coding	protein_coding	WBGene00013472	0.4379	660				FALSE	2.19184	0.583192		V	17241708	17242652	945	-	2.75305	0	0	0	0	0	0.227927	0	0	0	0	0
WBGene00015305	C01G5.3.1	C01G5.3	protein_coding	protein_coding	WBGene00015305	0.4016	1225				FALSE	2.19184	0.583192		IV	6536179	6537671	1493	+	2.75305	0	0	0	0	0	0.122802	0	0	0	0	0
WBGene00015601	C08E3.9.1	fbxa-166	protein_coding	protein_coding	WBGene00015601	0.3953	1179		GO:0005515		FALSE	2.19184	0.583192		II	1616912	1619004	2093	-	2.75305	0	0	0	0	0	0.127593	0	0	0	0	0
WBGene00016954	C55C3.4.1	C55C3.4	protein_coding	protein_coding	WBGene00016954	0.4625	1388	GO:0006468; GO:0007169; GO:0016310; GO:0018108; GO:0030154; GO:0045087	GO:0000166; GO:0004672; GO:0004712; GO:0004713; GO:0004715; GO:0005102; GO:0005524; GO:0016301; GO:0016740	GO:0031234	FALSE	2.19184	0.583192		IV	5676212	5678144	1933	-	2.75305	0	0	0	0	0	0.10838	0	0	0	0	0
WBGene00017188	F07B7.7.1	F07B7.7	protein_coding	protein_coding	WBGene00017188	0.4833	1047				FALSE	2.19184	0.583192		V	8835611	8836710	1100	+	2.75305	0	0	0	0	0	0.143679	0	0	0	0	0
WBGene00017912	F29A7.2.1	fbxb-107	protein_coding	protein_coding	WBGene00017912	0.4188	924				FALSE	2.19184	0.583192		II	2758625	2761856	3232	+	2.75305	0	0	0	0	0	0.162805	0	0	0	0	0
WBGene00020072	R13H9.6.1	R13H9.6	protein_coding	protein_coding	WBGene00020072	0.447	1237	GO:0006468; GO:0007165; GO:0016310; GO:0018105	GO:0000166; GO:0004672; GO:0004674; GO:0005524; GO:0016301	GO:0005634; GO:0005737	FALSE	2.19184	0.583192		IV	5067320	5068652	1333	-	2.5213	0	0	0	0	0	0.111373	0	0	0	0	0
WBGene00022145	Y71G12B.5a.1; Y71G12B.5b	Y71G12B.5	protein_coding	protein_coding	WBGene00022145	0.4298	3411				FALSE	2.19184	0.583192		I	1799717	1806986	7270	+	2.75305	0	0	0	0	0	0.044102	0	0	0	0	0
WBGene00022189	Y71H2AR.2.1	Y71H2AR.2	protein_coding	protein_coding	WBGene00022189	0.4056	1038	GO:0006508; GO:0051603	GO:0004197; GO:0008234	GO:0005615; GO:0005764; GO:0016020; GO:0016021	FALSE	2.19184	0.583192		III	2838763	2840927	2165	-	2.75305	0	0	0	0	0	0.144925	0	0	0	0	0
WBGene00235254	F49D11.14.1	F49D11.14	protein_coding	protein_coding	WBGene00235254	0.4534	322			GO:0016020; GO:0016021	FALSE	2.19184	0.583192		I	10936329	10936705	377	-	2.75305	0	0	0	0	0	0.46718	0	0	0	0	0
WBGene00015105	B0280.10a.1; B0280.10b.1; B0280.10c.1	pot-1	protein_coding	protein_coding	WBGene00015105	0.3604	939	GO:0000723; GO:1904357	GO:0003677; GO:0043047; GO:0061730	GO:0000781; GO:0005634; GO:0005635; GO:0005694	TRUE	2.19127	7.38265e-05	0.000223415	III	7131880	7133678	1799	-	122.786	173.282	135.288	28.8962	14.4967	50.5808	7.14284	9.191	8.55076	0.96206	0.480162	1.86469
[truncated: 18,828 more rows]
