# Supplementary material for: Prolonging somatic cell proliferation through constitutive hox gene expression in C. elegans
Source: Nat Commun. 2023 Oct 27;14:6850. doi: 10.1038/s41467-023-42644-1 (PMC10611754; doi:10.1038/s41467-023-42644-1)
Supplement: Supplementary file 6 — Supplementary Data 3 [file 41467_2023_42644_MOESM6_ESM.xlsx]

## Sheet: Sheet1
Table S3. List of oligonucleotides used.
	Primers for pSH5 (lin-39::zf-1::gfp::LoxP::SEC::LoxP3xFlag)
OSH9	CGACGGCCAGTCGCCGGCAATAGTCTCTGAGAATGCTTTACCC
OSH10	GTTTTGTATTCTGTGTGCTTGAATTGgTTaAAgAGTGGGAACCGGAATGGACCGAATG
OSH11	GCACACAGAATACAAAACGCGAC
OSH12	CTGAGGCTCCCGATGCTCCCCTCGGAACTCTCAGCTCATCTTG
OSH13	CAAGGATGACGATGACAAGAGATAGTTACTTGCCATTTTATATTTTGAG
OSH14	CATGTTATCGATTTCCTAGTTGGCGAAATAAATTGCAGCCAC
	Primers for pSH12 (hs-16p>zif-1::unc 54 3’UTR)
OSH73	GATAATCGTGAACTAACTCAC
OSH74	GTGAGTTAGTTCACGATTATCTAATAAAACTATGTCCAAAC
OSH75	GATAAATATTCAACAATAATAGGTCCAATTACTCTTCAACATC
OSH76	GTTGAAGAGTAATTGGACCTATTATTGTTGAATATTTATCGTGCAC
	Primers for pSH10 backbone (egl-17p> lin-39(gDNA)::gfp:: unc 54 3’UTR)
OSH87	CTGCAGGTCGACTCTAGAGATTGCTCCGAGTTCGAGCACTTGG
OSH88	GTGCTCGAACTCGGAGCAATCTCTAGAGTCGACCTGCAGGCATG
OSH89	GGTGCCCGAAATGTGAGCTTCCTCATCGGATCCATGACCACATC
OSH90	GTCATGGATCCGATGAGGAAGCTCACATTTCGGGCACCTGAAAAATC
	Primers for pSH32 (pbx-ACELp> lin-39(cDNA)+intron1::gfp:: unc 54 3’UTR)
OSH201	GTACCAGAGCTCACCTAGGAAAATTCAAAAACGGCCAACCCCC
OSH202	gatctTCCTCATCGGATCCATGACCACATC
OSH203	GTGGTCATGGATCCGATGAGGAagatctTTGGCGTACGCTTTCTGGTTATG
OSH204	CAGAAAGCGTACGCCAAagCACCTGTGTATTTTATGCTGG
OSH205	CATGGATCCGATGAGGAagAATCAATGCCTGAAAGTTAAAAATTAC
	Primers for pSH33 (ACELp> lin-39(cDNA)+intron1::gfp:: unc 54 3’UTR)
OSH223	GTACCAGAGCTCACCTAGGagCACCTGTGTATTTTATGCTGG
OSH224	ctCCTAGGTGAGCTCTGGTACCC
	Primers for pSH34 (pbx-ACELp>mab-5::gfp:: unc 54 3’UTR)
OSH231	GGATCCGATGAGGAagAATCAATG
OSH232	CCAGCGGTACCAGTCAACTTCTGG
OSH235	GATTctTCCTCATCGGATCCATGAGCATGTATCCTGGATGGAC
OSH236	GTTGACTGGTACCGCTGGAGAAGAATGTTGTTCATTTTGCTC
	Primers for pSH35 (pbx-ACELp>egl-5::gfp:: unc 54 3’UTR)
OSH231	GGATCCGATGAGGAagAATCAATG
OSH232	CCAGCGGTACCAGTCAACTTCTGG
OSH233	GATTctTCCTCATCGGATCCATGAACACTTCGACGAGTGCATTC
OSH234	GTTGACTGGTACCGCTGGCGGTGGACACAACGGGTATTGATATG
	Primers for pSH36 (pbx-ACELp>ceh-13::gfp:: unc 54 3’UTR)
OSH231	GGATCCGATGAGGAagAATCAATG
OSH232	CCAGCGGTACCAGTCAACTTCTGG
OSH237	GATTctTCCTCATCGGATCCATGAGCTCCACTGAATGTTATGG
OSH238	GTTGACTGGTACCGCTGGCTTGAAGTTTTTGACATCTTCT
	Primers for pSH40 (short pbx-ACELp> lin-39(cDNA)+intron1::gfp:: unc 54 3’UTR)
OSH262	GTACCAGAGCTCACCTAGGGGCCAACCCCCGGTGCGACTCTGATTAATCACTGTCTCCTCCCCCGTCACCCagCACCTGTGTATTTTATGCTGGTTTTTTC
OSH263	GGGTGACGGGGGAGGAGACAGTGATTAATCAGAGTCGCACCGGGGGTTGGCCCCTAGGTGAGCTCTGGTACCCTCTAG
	Primers for pSH42 (egl-17p> nls::gfp:: unc 54 3’UTR)
OSH269	CATGACTGCTCCAAAGAAGAAGCGTAAGGTACCGGTAGAAAAAAGTAAAGGAGAAGAACTTTTCACTGG
OSH270	GCCCGAAATGTGAGCTTCCTCATCGGATCCATGACTGCTCCAAAGAAGAAGCGTAAGGTACCGGTAGAAAAAAG
	Primers for pSH41 (pbx-ACELp> nls::gfp:: unc 54 3’UTR)
OSH269	CATGACTGCTCCAAAGAAGAAGCGTAAGGTACCGGTAGAAAAAAGTAAAGGAGAAGAACTTTTCACTGG
OSH271	CTTTTTTCTACCGGTACCTTACGCTTCTTCTTTGGAGCAGTCATGGATCCGATGAGGAagAATCAATGCC
	Primers for pSH51 (pbx-hlh-8p> lin-39(cDNA)+intron1::mCherry:: unc 54 3’UTR)
OSH308	CATGGATCCGATGAGGAagCTGTGAAAATCATATTTGAAATCG
OSH309	CAGAAAGCGTACGCCAAagCAAACATAGCATCTTACTTACTCG
	Primers for pSH55 (pbx-hlh-8p> nls::mCherry:: unc 54 3’UTR)
OSH327	CTTCTTTGGAGCAGTCATGGATCCGATGAGGAagCTGTGAAAATC
OSH328	CATGACTGCTCCAAAGAAGAAGCGTAAGGTACCGGTAGAAAAAATGGTCTCAAAGGGTGAAGAAGATAAC
OSH329	CATTTTTTCTACCGGTACCTTACGCTTCTTCTTTGGAGCAGTCATGGATCCGATGAGGAagCTGTGAAAATC
OSH330	GTAAGGTACCGGTAGAAAAAATGGTCTCAAAGGGTGAAGAAGATAAC
	Primers for pSH25 (egl-17p> lin-39(cDNA)+intron1::gfp:: unc 54 3’UTR)
OSH183	GTACCAGAGCTCACCTAGGATTGCTCCGAGTTCGAGCACTTGG
OSH184	CCTAGGTGAGCTCTGGTACCCTCTAG
OSH89	GGTGCCCGAAATGTGAGCTTCCTCATCGGATCCATGACCACATC
OSH90	GTCATGGATCCGATGAGGAAGCTCACATTTCGGGCACCTGAAAAATC
OSH191	CAGTCACTATGCTATAATCCATC
OSH192	GATGGATTATAGCATAGTGACTGAAAAAATGTTTATAATTAC
	Primers for pSH23 (egl-17p> lin-39(cDNA)+intron1::gfp:: unc 54 3’UTR)
OSH183	GTACCAGAGCTCACCTAGGATTGCTCCGAGTTCGAGCACTTGG
OSH184	CCTAGGTGAGCTCTGGTACCCTCTAG
OSH89	GGTGCCCGAAATGTGAGCTTCCTCATCGGATCCATGACCACATC
OSH90	GTCATGGATCCGATGAGGAAGCTCACATTTCGGGCACCTGAAAAATC
OSH61	GTTGACTGGTAGCGCTGGGAATTGATTGAAAAGTGGGAACCGG
OSH98	CCCACTTTTCAATCAATTCCCAGCGCTACCAGTCAACTTCTGG
	Primers for pSH39 (pbx-ACELp> lin-39(cDNA)+intron1::mCherry:: unc 54 3’UTR)
OSH191	CAGTCACTATGCTATAATCCATC
OSH192	GATGGATTATAGCATAGTGACTGAAAAAATGTTTATAATTAC
OSH98	CCCACTTTTCAATCAATTCCCAGCGCTACCAGTCAACTTCTGG
OSH197	CACCCTTTGAGACCATCAAGCCTGCTTTTTTGTACAAACTTG
OSH198	GATGGTCTCAAAGGGTGAAGAAG
OSH199	GTTCTACTTATACAATTCATCCATGC
OSH200	GATGAATTGTATAAGTAGAACATTTTCAGGAGGACCCTTGGC
