# Supplementary material for: Prolonging somatic cell proliferation through constitutive hox gene expression in C. elegans
Source: Nat Commun. 2023 Oct 27;14:6850. doi: 10.1038/s41467-023-42644-1 (PMC10611754; doi:10.1038/s41467-023-42644-1)
Supplement: Supplementary file 7 — Supplementary Data 4 [file 41467_2023_42644_MOESM7_ESM.xlsx]

## Sheet: Sheet1
Table S4. List of plasmids used.
pSH3	sgRNAATTGATTGAAAAGTGGGAAC targeting C-terminus of lin-39
pSH5	repair template for (lin-39::zf-1::gfp::LoxP::SEC::LoxP3xFlag)
pSH10	pCFJ151 backbone (egl-17p> lin-39(gDNA)::gfp:: unc 54 3’UTR)
pSH12	pSA120 backbone (hsp-16p>zif-1::unc 54 3’UTR)
pSH23	pCFJ151 backbone (egl-17p> lin-39(cDNA)::gfp:: unc 54 3’UTR)
pSH25	pCFJ151 backbone (egl-17p> lin-39(cDNA)+intron1::gfp:: unc 54 3’UTR)
pSH32	pCFJ151 backbone (pbx-ACELp> lin-39(cDNA)+intron1::gfp:: unc 54 3’UTR)
pSH33	pCFJ151 backbone (ACELp> lin-39(cDNA)+intron1::gfp:: unc 54 3’UTR)
pSH34	pCFJ151 backbone (pbx-ACELp> mab-5::gfp:: unc 54 3’UTR)
pSH35	pCFJ151 backbone (pbx-ACELp> egl-5::gfp::unc 54 3’UTR)
pSH36	pCFJ151 backbone (pbx-ACELp> ceh-13::gfp:: unc 54 3’UTR)
pSH39	pCFJ151 backbone (pbx-ACELp> lin-39(cDNA)+intron1::mCherry:: unc 54 3’UTR)
pSH40	pCFJ151 backbone (short-ACELp> lin-39(cDNA)+intron1::gfp:: unc 54 3’UTR)
pSH41	pCFJ151 backbone (pbx-ACELp> nls::gfp:: unc 54 3’UTR)
pSH42	pCFJ151 backbone (egl-17p> nls::gfp:: unc 54 3’UTR)
pSH51	pCFJ151 backbone (pbx-hlh-8p> lin-39(cDNA)+intron1::mCherry:: unc 54 3’UTR)
pSH55	pCFJ151 backbone (pbx-hlh-8p> nls::mCherry:: unc 54 3’UTR)
